# Supplementary material for: Fucosylation Enhances CD34⁺ Hematopoietic Stem Cell Homing and Longevity via E-Selectin–Mediated Adhesion and Signaling
Source: Research Square preprint supplement (doi:10.21203/rs.3.rs-7961408/v1), 2025-11-26
Supplement: Supplementary file 1 [file 9c04a12f365dc4a90956fbc8.pdf]

Full blot images

## Figure 1(B)

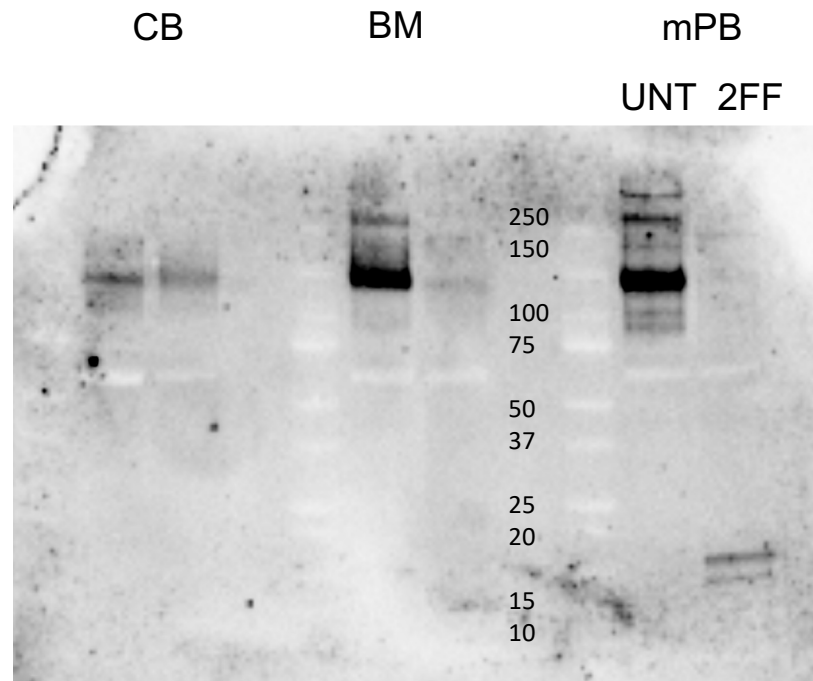

HECA-452 blot

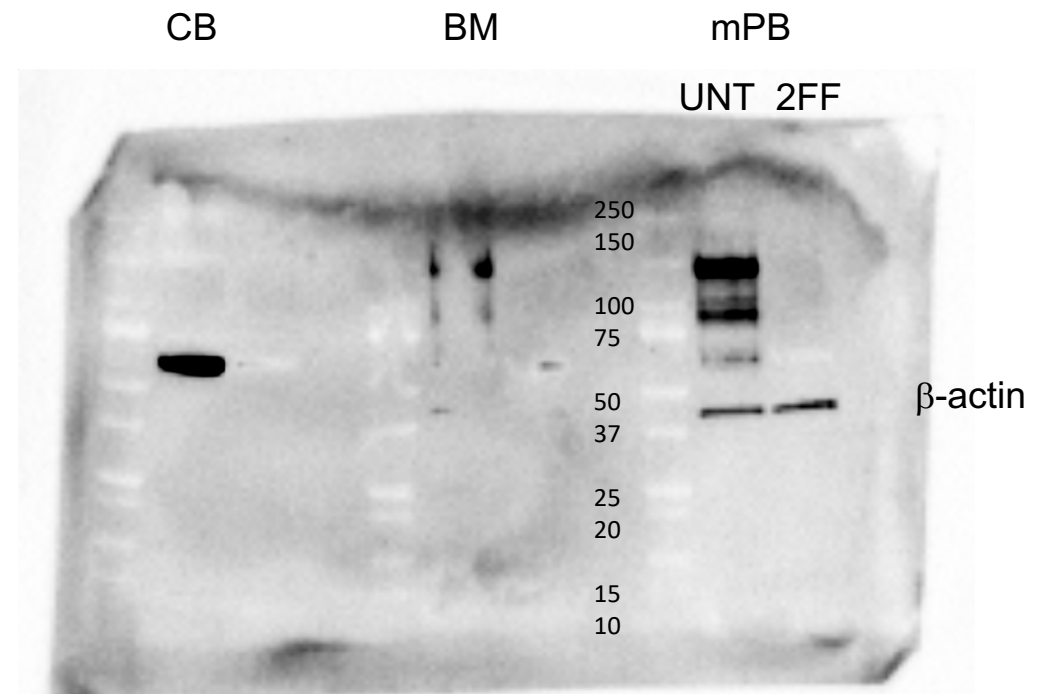

E-selectin blot

Figure 1B: Western blot analysis of HECA-452 (left) and E-selectin (right) in untreated (UNT) and 2FF-treated human mPB-CD34<sup>+</sup> cells for whole cell lysate.  $\beta$ -actin was used as loading control in the blot on the right.

**Note:** only mPB data were used for the manuscript. CB: cord blood; BM: bone marrow; mPB: mobilized peripheral blood

# Figure 1(D) CD43

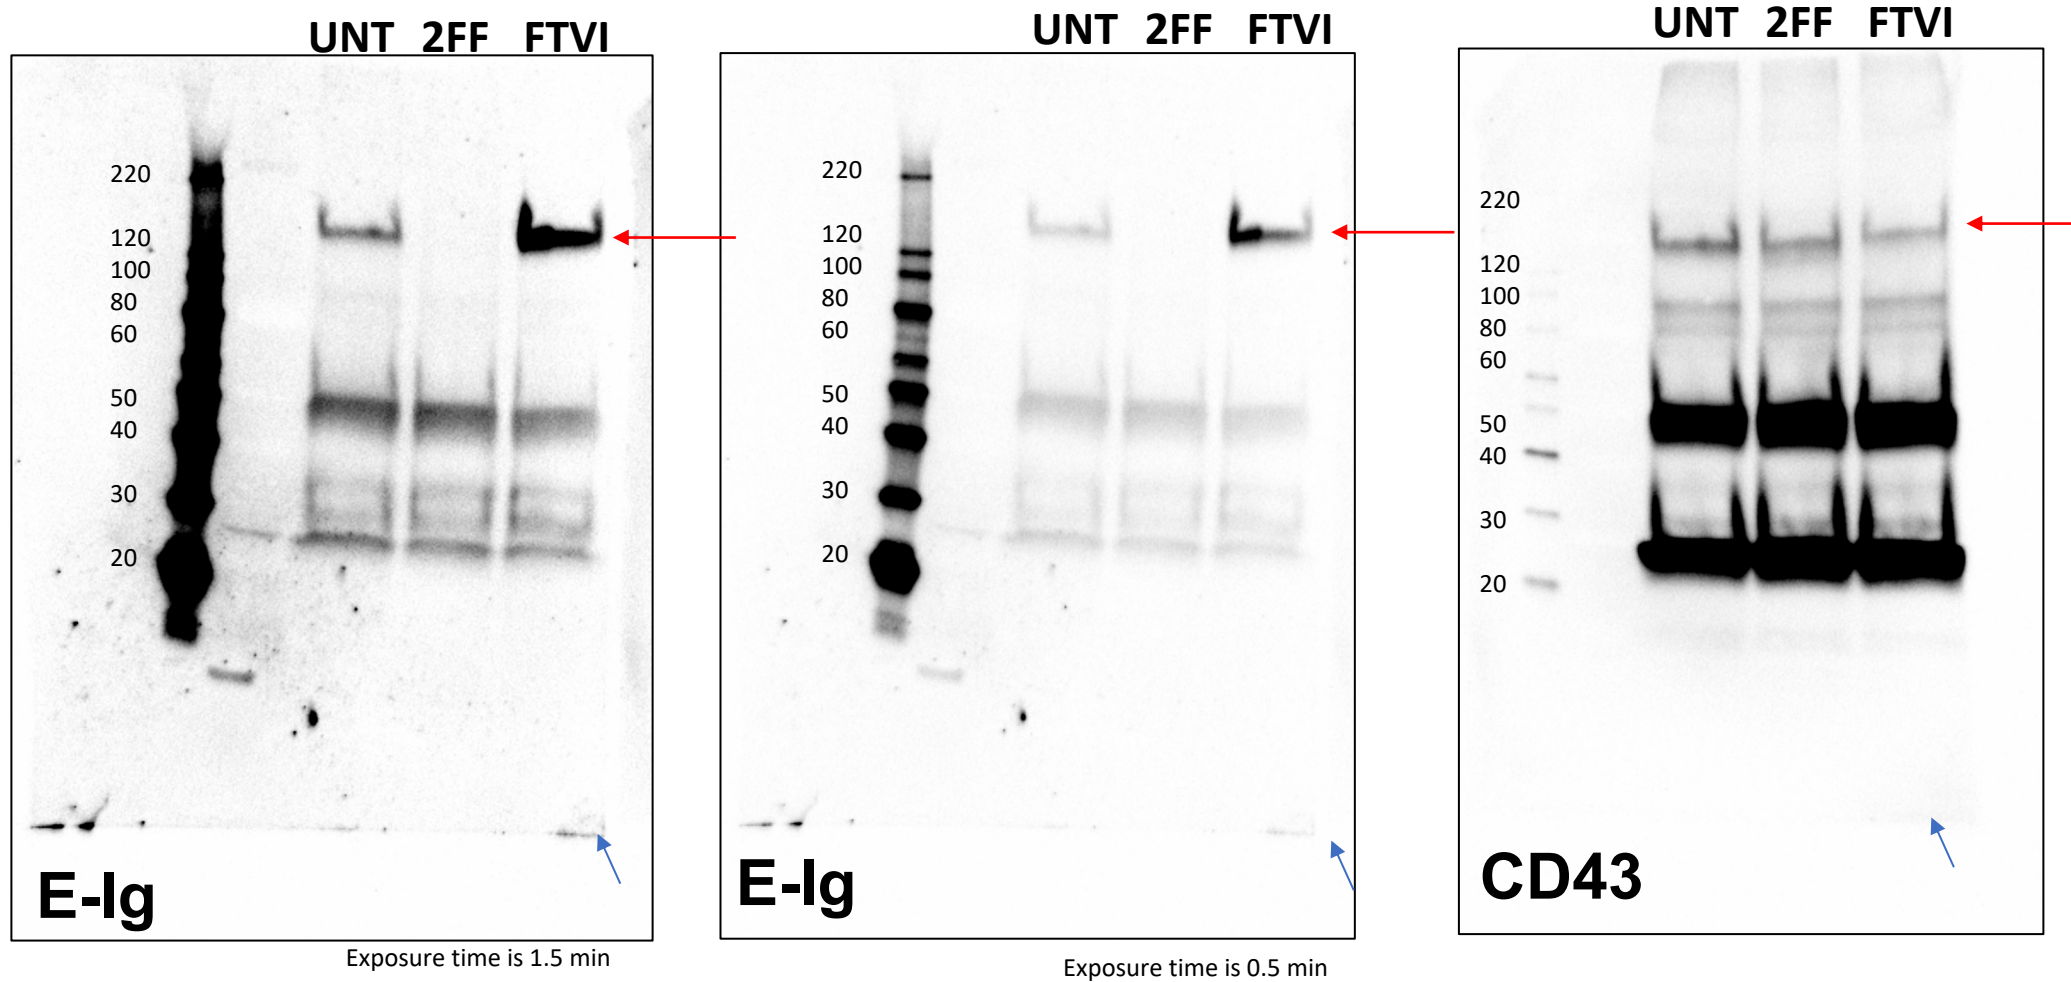

Figure 1D: Endogenous CD43 was immunoprecipitated from untreated (UNT), 2FF-treated, and FTVI-treated mPB-CD34+ cells. The immunoprecipitated proteins were prepared for western blot analysis and blotted for E-selectin (E-Ig; left and middle) with different exposure times or blotted directly for CD43 (right). The bands at ~25 and 50 kDa correspond to the precipitating antibody light and heavy chains. The blue arrows indicate the edge of the blots. The red arrow indicates the protein of interest.

## Figure 1(D) CD44

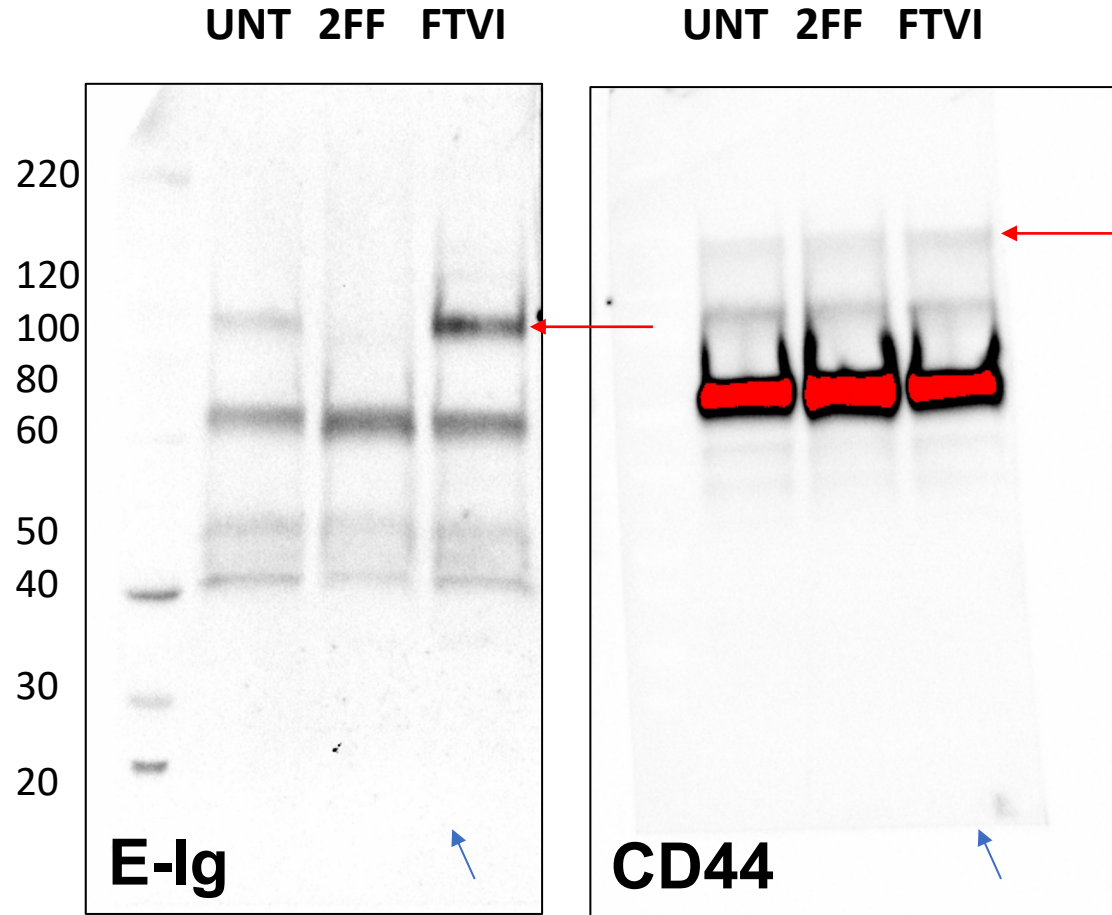

Figure 1D: Endogenous CD44 was immunoprecipitated from untreated (UNT), 2FF-treated, and FTVI-treated mPB-CD34+ cells. The immunoprecipitated proteins were prepared for western blot analysis and blotted for E-selectin (E-Ig; left ) or for CD44 protein (right). The bands at ~25 and 50 kDa correspond to the precipitating antibody light and heavy chains. The blue arrows indicate the edge of the blots. The red arrow indicates the protein of interest.

# Figure 1(D) CD162

UNT 2FF FTVI

UNT 2FF FTVI

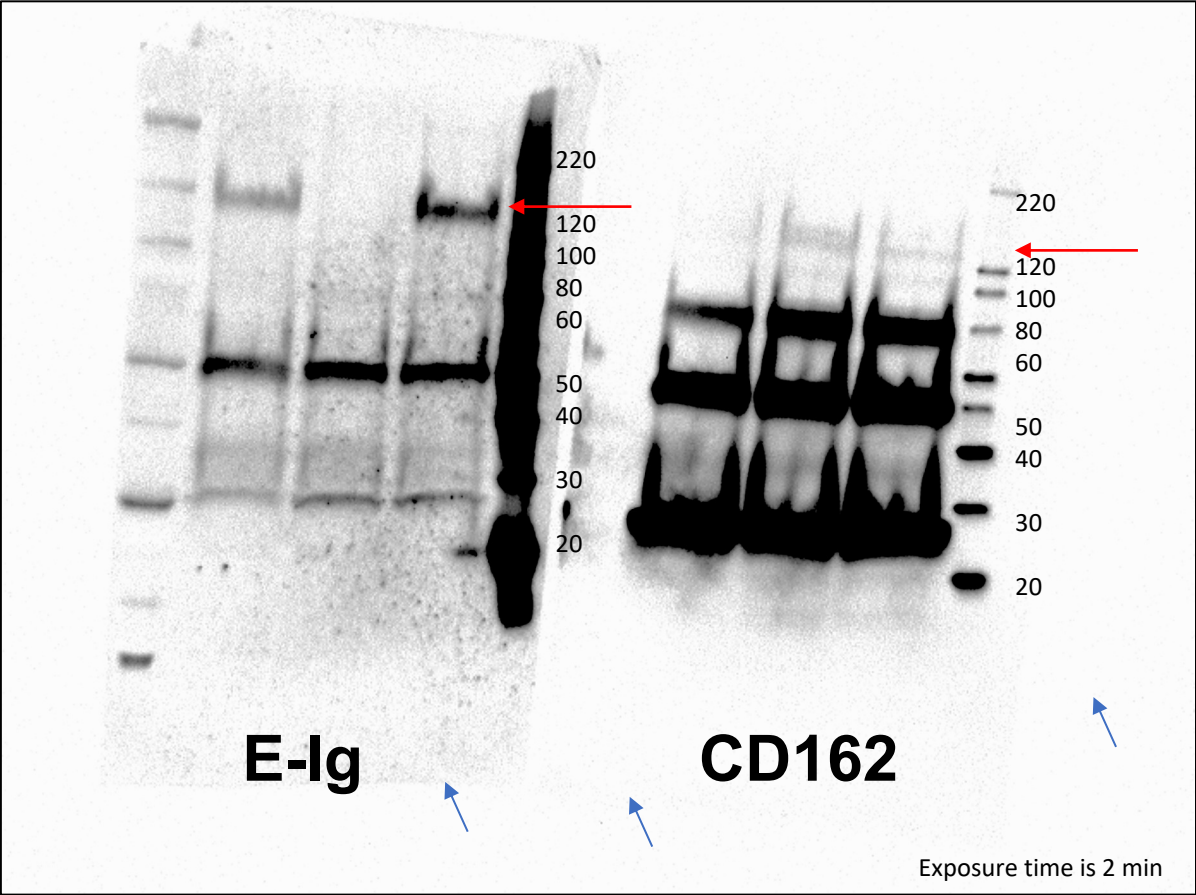

UNT 2FF FTVI

UNT 2FF FTVI

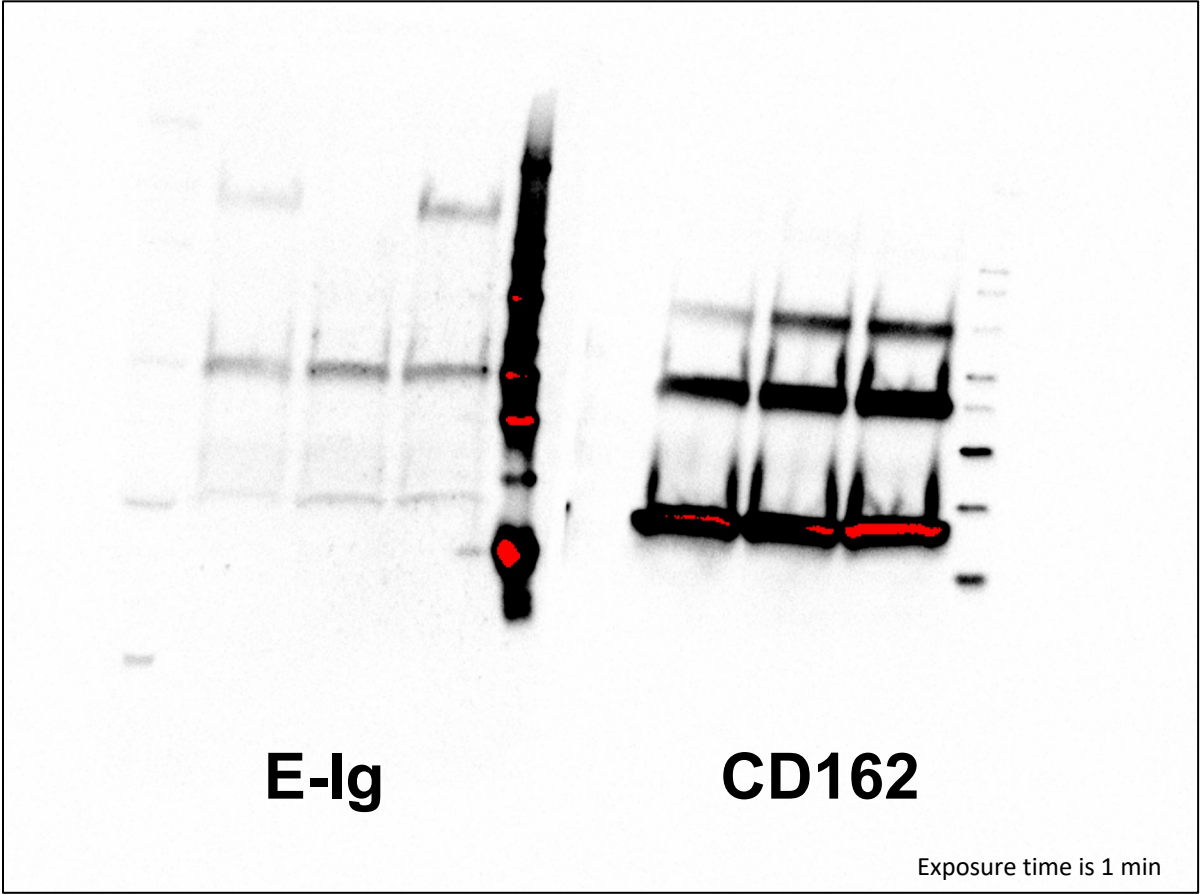

Figure 1D: Endogenous CD162 was immunoprecipitated from untreated (UNT), 2FF-treated, and FTVI-treated mPB-CD34+ cells. The immunoprecipitated proteins were prepared for western blot analysis and blotted for E-selectin (E-Ig) or for CD162 protein. The same blot is shown on the right and left with two different exposure times. The bands at ~25 and 50 kDa correspond to the precipitating antibody light and heavy chains. The blue arrows indicate the edge of the blots. The red arrow indicates the protein of interest.



# Figure S5(D)

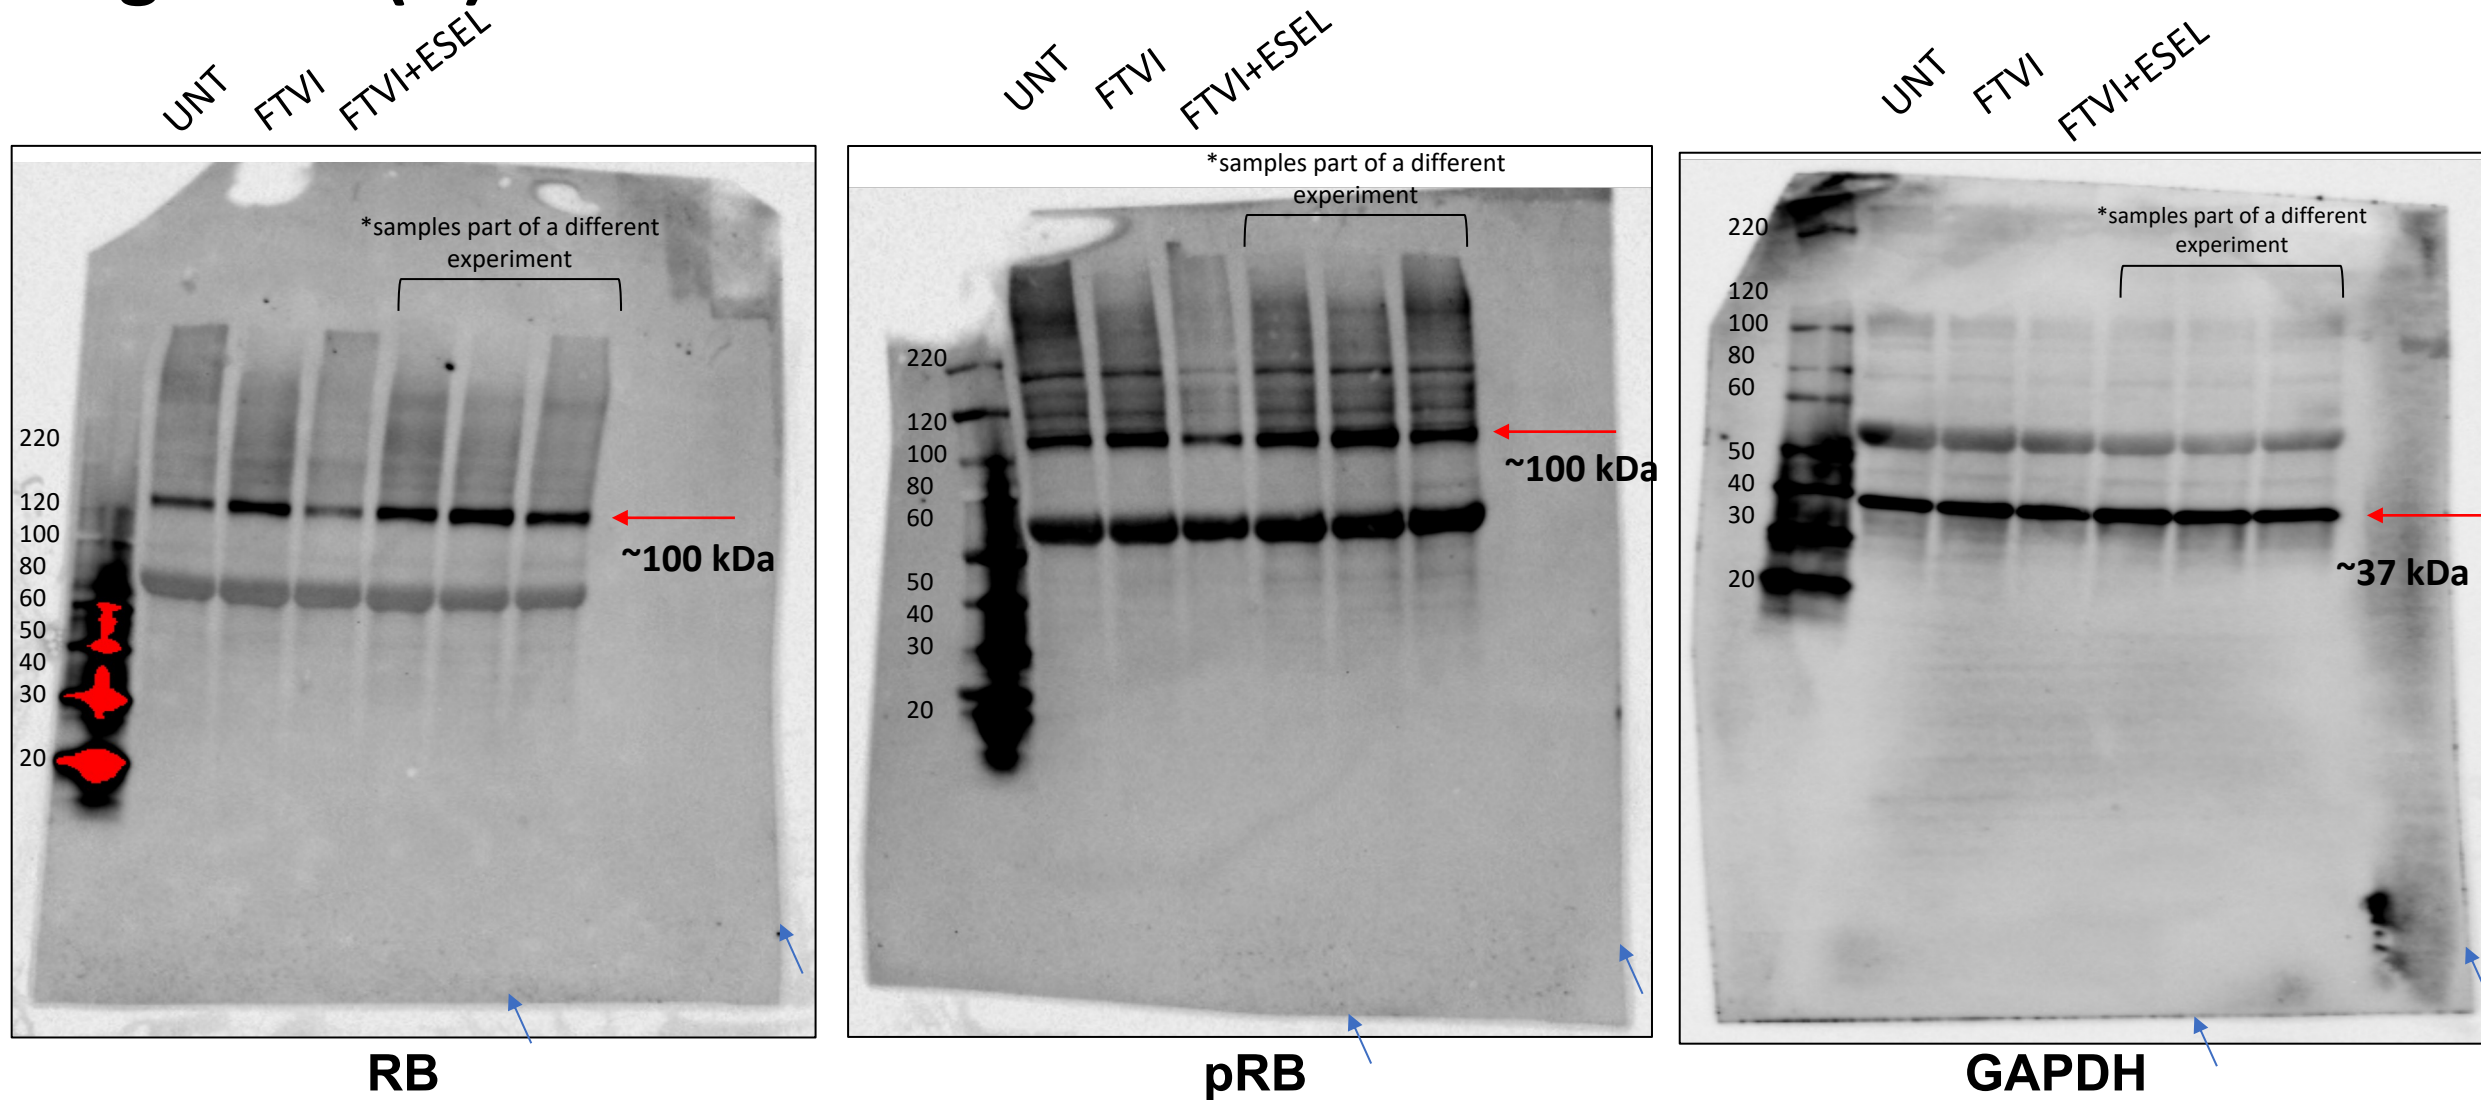

Figure S5D: Western blot analysis for retinoblastoma (RB; left) and phospho-RB (middle) and loading control GAPDH (right) in untreated (UNT), FTVI-treated and FTVI+E-selectin (ESEL) treated human mPB-CD34<sup>+</sup> cells for whole cell lysate. Note: only the first three lanes were used in the current manuscript. The blue arrows indicate the edge of the blots. The red arrow indicates the protein of interest.
