# Supplementary material for: Fucosylation Enhances CD34⁺ Hematopoietic Stem Cell Homing and Longevity via E-Selectin–Mediated Adhesion and Signaling
Source: Research Square preprint supplement (doi:10.21203/rs.3.rs-7961408/v1), 2025-11-26
Supplement: Supplementary file 1 [file a8a45c4b30390afcc7130e22.xlsx]

## Sheet: Sheet1
gene_id	gene	cluster	avg_log2FC	p_val	p_val_adj	pct.1	pct.2
ENSG00000145708	CRHBP	0	0.839661	0	0	0.835	0.391
ENSG00000226777	FAM30A	0	0.761571	3.29e-253	8.62e-249	0.981	0.751
ENSG00000169756	LIMS1	0	0.843339	1.51e-252	3.96e-248	0.983	0.785
ENSG00000180530	NRIP1	0	0.771987	2.02e-246	5.28e-242	0.983	0.767
ENSG00000169442	CD52	0	0.726988	3.34e-246	8.75e-242	0.978	0.707
ENSG00000133112	TPT1	0	0.767054	4.35e-242	1.14e-237	0.995	0.874
ENSG00000171848	RRM2	0	-0.971593	1.34e-237	3.52e-233	0.104	0.581
ENSG00000101200	AVP	0	1.01744	7.23e-229	1.9e-224	0.94	0.616
ENSG00000164116	GUCY1A1	0	0.553237	1.72e-223	4.52e-219	0.905	0.598
ENSG00000171476	HOPX	0	0.497789	1.46e-221	3.83e-217	0.903	0.54
ENSG00000089685	BIRC5	0	-0.547377	4.19e-213	1.1e-208	0.065	0.519
ENSG00000157110	RBPMS	0	0.450471	1.03e-211	2.7e-207	0.851	0.499
ENSG00000185532	PRKG1	0	0.627405	6.19e-209	1.62e-204	0.9	0.547
ENSG00000188580	NKAIN2	0	0.881248	1.27e-208	3.32e-204	0.973	0.762
ENSG00000166803	PCLAF	0	-0.845916	1.37e-201	3.59e-197	0.481	0.73
ENSG00000148773	MKI67	0	-0.758611	7.95e-200	2.08e-195	0.124	0.549
ENSG00000101057	MYBL2	0	-0.370414	4.88e-194	1.28e-189	0.092	0.522
ENSG00000109475	RPL34	0	0.592921	2.73e-191	7.15e-187	0.995	0.885
ENSG00000229425	AJ009632.2	0	0.454265	1.55e-187	4.07e-183	0.738	0.376
ENSG00000133019	CHRM3	0	0.611076	4.38e-184	1.15e-179	0.959	0.696
ENSG00000171502	COL24A1	0	0.566972	4.91e-178	1.29e-173	0.771	0.446
ENSG00000234741	GAS5	0	0.566371	5.98e-176	1.57e-171	0.984	0.796
ENSG00000167900	TK1	0	-0.341378	4.96e-175	1.3e-170	0.087	0.494
ENSG00000128040	SPINK2	0	0.48481	1.01e-174	2.64e-170	0.943	0.611
ENSG00000204287	HLA-DRA	0	0.637991	2.32e-171	6.07e-167	0.978	0.74
ENSG00000152518	ZFP36L2	0	0.615615	4.01e-168	1.05e-163	0.974	0.744
ENSG00000134324	LPIN1	0	0.326326	4.67e-168	1.22e-163	0.846	0.561
ENSG00000152253	SPC25	0	-0.409912	6.83e-168	1.79e-163	0.102	0.494
ENSG00000125691	RPL23	0	0.596377	3.72e-167	9.73e-163	0.99	0.83
ENSG00000156535	CD109	0	0.45452	1.04e-166	2.72e-162	0.896	0.635
ENSG00000141293	SKAP1	0	0.416633	1.63e-166	4.27e-162	0.75	0.415
ENSG00000081189	MEF2C	0	0.450243	5.01e-166	1.31e-161	0.948	0.698
ENSG00000109452	INPP4B	0	0.522747	3.49e-162	9.14e-158	0.958	0.687
ENSG00000071082	RPL31	0	0.518912	1.95e-161	5.12e-157	0.989	0.807
ENSG00000121211	MND1	0	-0.360288	5.49e-160	1.44e-155	0.151	0.542
ENSG00000196126	HLA-DRB1	0	0.606802	5.53e-160	1.45e-155	0.967	0.737
ENSG00000198589	LRBA	0	0.552977	5.71e-159	1.5e-154	0.989	0.833
ENSG00000066279	ASPM	0	-0.560195	8.45e-157	2.21e-152	0.11	0.484
ENSG00000245910	SNHG6	0	0.499901	5.47e-156	1.43e-151	0.988	0.804
ENSG00000131747	TOP2A	0	-0.839778	1.31e-155	3.43e-151	0.258	0.591
ENSG00000198034	RPS4X	0	0.604454	4.7e-154	1.23e-149	0.993	0.862
ENSG00000046889	PREX2	0	0.276943	2.08e-153	5.45e-149	0.544	0.226
ENSG00000163682	RPL9	0	0.519819	2.01e-152	5.27e-148	0.995	0.854
ENSG00000142534	RPS11	0	0.557458	1.21e-146	3.16e-142	0.99	0.853
ENSG00000163808	KIF15	0	-0.403295	4.75e-145	1.24e-140	0.127	0.488
ENSG00000122406	RPL5	0	0.520972	5.36e-145	1.4e-140	0.993	0.88
ENSG00000196531	NACA	0	0.537416	8.87e-145	2.32e-140	0.99	0.841
ENSG00000171843	MLLT3	0	0.459642	1.8e-144	4.71e-140	0.874	0.619
ENSG00000174059	CD34	0	0.417414	2.38e-143	6.25e-139	0.939	0.679
ENSG00000223865	HLA-DPB1	0	0.457916	2.68e-143	7.02e-139	0.95	0.725
ENSG00000138326	RPS24	0	0.519658	1.75e-142	4.59e-138	0.995	0.895
ENSG00000257176	AC009318.1	0	0.397001	1.86e-142	4.87e-138	0.705	0.417
ENSG00000167526	RPL13	0	0.567852	1.03e-140	2.7e-136	0.996	0.911
ENSG00000139734	DIAPH3	0	-0.62236	3.93e-140	1.03e-135	0.257	0.58
ENSG00000166441	RPL27A	0	0.554006	1.1e-139	2.88e-135	0.991	0.851
ENSG00000090889	KIF4A	0	-0.295924	8.13e-139	2.13e-134	0.048	0.397
ENSG00000019582	CD74	0	0.495989	1.47e-137	3.84e-133	0.982	0.788
ENSG00000142541	RPL13A	0	0.5902	1.72e-137	4.51e-133	0.992	0.868
ENSG00000137804	NUSAP1	0	-0.602068	3.96e-137	1.04e-132	0.323	0.611
ENSG00000156482	RPL30	0	0.550821	3.68e-136	9.63e-132	0.994	0.854
ENSG00000165966	PDZRN4	0	0.628722	1.04e-134	2.72e-130	0.586	0.287
ENSG00000109805	NCAPG	0	-0.277158	2.62e-134	6.86e-130	0.074	0.419
ENSG00000169908	TM4SF1	0	0.288872	5.15e-134	1.35e-129	0.493	0.209
ENSG00000137154	RPS6	0	0.507588	3.87e-133	1.01e-128	0.994	0.889
ENSG00000117724	CENPF	0	-0.784488	6.04e-133	1.58e-128	0.337	0.617
ENSG00000085276	MECOM	0	0.391982	8.98e-133	2.35e-128	0.706	0.429
ENSG00000135535	CD164	0	0.333439	1.5e-131	3.94e-127	0.869	0.623
ENSG00000122026	RPL21	0	0.489268	1.03e-130	2.71e-126	0.996	0.885
ENSG00000075218	GTSE1	0	-0.346047	1.15e-130	3.01e-126	0.07	0.405
ENSG00000231389	HLA-DPA1	0	0.458473	2.05e-129	5.38e-125	0.939	0.69
ENSG00000170312	CDK1	0	-0.286307	4.27e-129	1.12e-124	0.078	0.409
ENSG00000170891	CYTL1	0	0.348422	1.96e-128	5.13e-124	0.808	0.53
ENSG00000186185	KIF18B	0	-0.319336	6.93e-128	1.82e-123	0.054	0.382
ENSG00000130303	BST2	0	0.341741	2.61e-127	6.85e-123	0.858	0.586
ENSG00000164104	HMGB2	0	-0.899462	2.8e-125	7.33e-121	0.736	0.746
ENSG00000197956	S100A6	0	0.503098	5.98e-125	1.57e-120	0.978	0.737
ENSG00000142676	RPL11	0	0.514374	8.45e-125	2.21e-120	0.997	0.878
ENSG00000115306	SPTBN1	0	0.317517	1.22e-124	3.19e-120	0.827	0.567
ENSG00000112306	RPS12	0	0.534286	1.51e-124	3.96e-120	0.996	0.907
ENSG00000127955	GNAI1	0	0.254472	3.08e-124	8.07e-120	0.75	0.469
ENSG00000111145	ELK3	0	0.259879	2.05e-123	5.38e-119	0.809	0.544
ENSG00000198918	RPL39	0	0.486612	2.75e-123	7.2e-119	0.995	0.873
ENSG00000156508	EEF1A1	0	0.497234	5.95e-123	1.56e-118	0.997	0.925
ENSG00000142937	RPS8	0	0.503314	6.24e-123	1.63e-118	0.996	0.893
ENSG00000138722	MMRN1	0	0.255379	3.78e-121	9.9e-117	0.644	0.374
ENSG00000100316	RPL3	0	0.540313	5.39e-121	1.41e-116	0.995	0.883
ENSG00000185345	PRKN	0	0.343256	5.83e-121	1.53e-116	0.728	0.444
ENSG00000184357	HIST1H1B	0	-0.59547	1.06e-120	2.77e-116	0.048	0.356
ENSG00000008988	RPS20	0	0.509156	1.86e-118	4.87e-114	0.99	0.823
ENSG00000145425	RPS3A	0	0.505113	1.17e-117	3.07e-113	0.996	0.879
ENSG00000126787	DLGAP5	0	-0.26619	1.21e-117	3.17e-113	0.035	0.338
ENSG00000069667	RORA	0	0.3399	7.26e-117	1.9e-112	0.444	0.179
ENSG00000136205	TNS3	0	0.265772	1.8e-116	4.72e-112	0.837	0.574
ENSG00000161970	RPL26	0	0.513891	9.22e-116	2.42e-111	0.994	0.869
ENSG00000175063	UBE2C	0	-0.381434	3.6e-115	9.42e-111	0.112	0.425
ENSG00000197959	DNM3	0	0.252278	1.43e-114	3.74e-110	0.548	0.269
ENSG00000174099	MSRB3	0	0.36242	2.34e-114	6.13e-110	0.951	0.753
ENSG00000154188	ANGPT1	0	0.445708	3.3e-113	8.63e-109	0.941	0.697
ENSG00000163565	IFI16	0	0.278382	4.91e-113	1.29e-108	0.894	0.627
ENSG00000265681	RPL17	0	0.494557	4.93e-113	1.29e-108	0.991	0.859
ENSG00000231500	RPS18	0	0.511554	9.02e-113	2.36e-108	0.995	0.898
ENSG00000117450	PRDX1	0	0.483333	4.76e-112	1.25e-107	0.983	0.772
ENSG00000173482	PTPRM	0	0.269883	5.94e-112	1.56e-107	0.705	0.424
ENSG00000179344	HLA-DQB1	0	0.278003	2.13e-111	5.59e-107	0.841	0.602
ENSG00000251562	MALAT1	0	0.413067	3.64e-110	9.53e-106	1	0.981
ENSG00000197958	RPL12	0	0.477545	4.42e-110	1.16e-105	0.995	0.891
ENSG00000104894	CD37	0	0.260966	7.37e-108	1.93e-103	0.884	0.646
ENSG00000142945	KIF2C	0	-0.265466	9.58e-108	2.51e-103	0.086	0.386
ENSG00000198755	RPL10A	0	0.475096	2.15e-107	5.62e-103	0.988	0.839
ENSG00000120833	SOCS2	0	0.258647	2.61e-107	6.84e-103	0.74	0.499
ENSG00000143947	RPS27A	0	0.471513	1.51e-106	3.97e-102	0.995	0.877
ENSG00000196730	DAPK1	0	0.282498	1.48e-105	3.88e-101	0.886	0.651
ENSG00000286522	HIST1H3B	0	-0.253051	3.09e-105	8.1e-101	0.026	0.3
ENSG00000215386	MIR99AHG	0	0.298569	2.03e-104	5.33e-100	0.713	0.444
ENSG00000276368	HIST1H2AJ	0	-0.3235	9.95e-104	2.61e-99	0.038	0.314
ENSG00000139318	DUSP6	0	0.27764	1.33e-103	3.48e-99	0.619	0.372
ENSG00000164032	H2AFZ	0	-0.8963	1.34e-103	3.51e-99	0.935	0.779
ENSG00000105373	NOP53	0	0.363583	1.78e-103	4.65e-99	0.98	0.777
ENSG00000142669	SH3BGRL3	0	0.428973	2.63e-103	6.9e-99	0.99	0.788
ENSG00000182899	RPL35A	0	0.463431	8.19e-103	2.15e-98	0.995	0.849
ENSG00000080986	NDC80	0	-0.272633	2.13e-102	5.57e-98	0.116	0.411
ENSG00000204592	HLA-E	0	0.294443	2.78e-101	7.29e-97	0.922	0.695
ENSG00000137812	KNL1	0	-0.326148	7.01e-101	1.84e-96	0.189	0.482
ENSG00000179399	GPC5	0	0.436452	6.61e-100	1.73e-95	0.58	0.32
ENSG00000136156	ITM2B	0	0.287749	2.12e-99	5.57e-95	0.918	0.675
ENSG00000144746	ARL6IP5	0	0.257739	3.88e-99	1.02e-94	0.858	0.631
ENSG00000188243	COMMD6	0	0.328897	1.39e-98	3.63e-94	0.958	0.727
ENSG00000133789	SWAP70	0	0.258904	8.91e-98	2.33e-93	0.841	0.631
ENSG00000142875	PRKACB	0	0.311943	1.07e-97	2.8e-93	0.933	0.732
ENSG00000227598	Z94721.1	0	-0.402445	1.42e-97	3.72e-93	0.229	0.516
ENSG00000159335	PTMS	0	0.268178	1.79e-97	4.69e-93	0.891	0.63
ENSG00000102908	NFAT5	0	0.265731	4.96e-97	1.3e-92	0.889	0.666
ENSG00000136280	CCM2	0	0.275332	6.54e-97	1.71e-92	0.899	0.702
ENSG00000175061	SNHG29	0	0.45166	8.86e-97	2.32e-92	0.99	0.845
ENSG00000189403	HMGB1	0	-0.637909	1.72e-96	4.51e-92	0.995	0.887
ENSG00000135404	CD63	0	0.368442	1.05e-95	2.76e-91	0.981	0.731
ENSG00000269893	SNHG8	0	0.336963	1.99e-95	5.22e-91	0.988	0.779
ENSG00000176890	TYMS	0	-0.599242	2.31e-95	6.04e-91	0.701	0.729
ENSG00000170889	RPS9	0	0.460443	3.13e-95	8.2e-91	0.994	0.859
ENSG00000143995	MEIS1	0	0.260664	3.19e-95	8.35e-91	0.815	0.569
ENSG00000196154	S100A4	0	0.516901	1.73e-94	4.52e-90	0.918	0.688
ENSG00000051341	POLQ	0	-0.489677	1.77e-94	4.65e-90	0.296	0.563
ENSG00000197756	RPL37A	0	0.438894	2.83e-94	7.41e-90	0.996	0.871
ENSG00000114391	RPL24	0	0.418998	8.92e-94	2.34e-89	0.993	0.838
ENSG00000164587	RPS14	0	0.462885	1.8e-93	4.72e-89	0.993	0.873
ENSG00000165304	MELK	0	-0.266048	4.73e-93	1.24e-88	0.13	0.411
ENSG00000157554	ERG	0	0.2864	3.36e-92	8.79e-88	0.931	0.711
ENSG00000100526	CDKN3	0	-0.299639	3.4e-92	8.9e-88	0.205	0.482
ENSG00000241343	RPL36A	0	0.421332	4.63e-92	1.21e-87	0.991	0.849
ENSG00000187147	RNF220	0	0.327014	6.14e-92	1.61e-87	0.98	0.831
ENSG00000198795	ZNF521	0	0.270797	1.85e-91	4.84e-87	0.892	0.667
ENSG00000116251	RPL22	0	0.386854	3.36e-91	8.8e-87	0.993	0.858
ENSG00000186468	RPS23	0	0.454273	3.62e-90	9.49e-86	0.995	0.884
ENSG00000144713	RPL32	0	0.434469	4.75e-90	1.25e-85	0.993	0.887
ENSG00000122966	CIT	0	-0.350505	5.94e-90	1.56e-85	0.204	0.483
ENSG00000138669	PRKG2	0	0.259356	5.94e-90	1.56e-85	0.646	0.394
ENSG00000105372	RPS19	0	0.452339	1.22e-89	3.19e-85	0.996	0.893
ENSG00000177694	NAALADL2	0	0.336955	4.48e-89	1.17e-84	0.881	0.657
ENSG00000147403	RPL10	0	0.4689	1.24e-88	3.26e-84	0.993	0.856
ENSG00000128322	IGLL1	0	-0.442723	2.44e-88	6.39e-84	0.1	0.361
ENSG00000147604	RPL7	0	0.434358	2.5e-88	6.55e-84	0.988	0.825
ENSG00000104408	EIF3E	0	0.314567	3.22e-88	8.45e-84	0.987	0.807
ENSG00000076662	ICAM3	0	0.262357	3.9e-88	1.02e-83	0.868	0.641
ENSG00000196782	MAML3	0	0.331419	8.42e-88	2.21e-83	0.955	0.76
ENSG00000275896	PRSS2	0	0.276405	1.32e-87	3.47e-83	0.37	0.153
ENSG00000153201	RANBP2	0	0.262422	1.53e-87	4.02e-83	0.898	0.706
ENSG00000183166	CALN1	0	0.307872	1.78e-87	4.67e-83	0.956	0.759
ENSG00000177954	RPS27	0	0.388817	2.38e-87	6.22e-83	0.994	0.87
ENSG00000134215	VAV3	0	0.27389	5.25e-87	1.38e-82	0.965	0.781
ENSG00000137818	RPLP1	0	0.43728	1.45e-86	3.81e-82	0.999	0.917
ENSG00000145687	SSBP2	0	0.31627	3.41e-86	8.93e-82	0.969	0.79
ENSG00000183742	MACC1	0	0.259855	1.16e-85	3.04e-81	0.683	0.453
ENSG00000140988	RPS2	0	0.461593	2.09e-85	5.48e-81	0.996	0.894
ENSG00000149273	RPS3	0	0.447204	2.41e-85	6.31e-81	0.995	0.865
ENSG00000177410	ZFAS1	0	0.347382	1.47e-84	3.84e-80	0.994	0.848
ENSG00000089009	RPL6	0	0.382155	8.66e-84	2.27e-79	0.992	0.86
ENSG00000184305	CCSER1	0	0.29229	7.88e-83	2.06e-78	0.882	0.673
ENSG00000233723	LINC01122	0	0.276837	1.88e-82	4.92e-78	0.766	0.51
ENSG00000114942	EEF1B2	0	0.409519	4.78e-82	1.25e-77	0.992	0.834
ENSG00000089157	RPLP0	0	0.41161	6.38e-82	1.67e-77	0.995	0.87
ENSG00000135655	USP15	0	0.296854	1.47e-81	3.84e-77	0.955	0.789
ENSG00000138160	KIF11	0	-0.313298	2.31e-81	6.06e-77	0.24	0.492
ENSG00000171863	RPS7	0	0.414134	8.53e-81	2.23e-76	0.995	0.858
ENSG00000108107	RPL28	0	0.398417	3.93e-79	1.03e-74	0.994	0.893
ENSG00000254772	EEF1G	0	0.401934	1.09e-78	2.85e-74	0.992	0.831
ENSG00000198830	HMGN2	0	-0.642844	1.21e-78	3.18e-74	0.975	0.825
ENSG00000123349	PFDN5	0	0.346904	2.65e-78	6.93e-74	0.988	0.796
ENSG00000119866	BCL11A	0	0.268298	4.27e-78	1.12e-73	0.851	0.637
ENSG00000156802	ATAD2	0	-0.514091	9.56e-78	2.5e-73	0.575	0.705
ENSG00000148303	RPL7A	0	0.42564	2.92e-77	7.66e-73	0.993	0.853
ENSG00000163191	S100A11	0	0.259757	1.02e-74	2.67e-70	0.92	0.693
ENSG00000134419	RPS15A	0	0.411664	1.25e-74	3.28e-70	0.992	0.855
ENSG00000174748	RPL15	0	0.406979	1.16e-73	3.03e-69	0.993	0.843
ENSG00000128951	DUT	0	-0.601105	1.38e-73	3.62e-69	0.899	0.785
ENSG00000063177	RPL18	0	0.40894	1.99e-72	5.22e-68	0.99	0.842
ENSG00000117632	STMN1	0	-0.534806	1.37e-70	3.6e-66	0.913	0.779
ENSG00000118193	KIF14	0	-0.258595	3.55e-70	9.29e-66	0.15	0.39
ENSG00000104043	ATP8B4	0	-0.502238	9.19e-70	2.41e-65	0.108	0.338
ENSG00000203760	CENPW	0	-0.27053	4.98e-69	1.3e-64	0.411	0.59
ENSG00000144554	FANCD2	0	-0.331569	1.38e-68	3.61e-64	0.282	0.519
ENSG00000145592	RPL37	0	0.375283	1.68e-67	4.4e-63	0.995	0.883
ENSG00000118181	RPS25	0	0.352574	2.03e-67	5.32e-63	0.991	0.841
ENSG00000197061	HIST1H4C	0	-1.99258	2.59e-67	6.78e-63	0.93	0.76
ENSG00000182774	RPS17	0	0.362358	3.18e-67	8.34e-63	0.993	0.84
ENSG00000156970	BUB1B	0	-0.312535	6.98e-67	1.83e-62	0.27	0.496
ENSG00000088325	TPX2	0	-0.425346	2.26e-66	5.91e-62	0.377	0.553
ENSG00000197409	HIST1H3D	0	-0.274005	1.23e-65	3.21e-61	0.084	0.302
ENSG00000151725	CENPU	0	-0.311809	2.05e-65	5.38e-61	0.475	0.638
ENSG00000196683	TOMM7	0	0.286971	2.83e-65	7.42e-61	0.974	0.768
ENSG00000138778	CENPE	0	-0.388353	1.24e-64	3.24e-60	0.193	0.416
ENSG00000166710	B2M	0	0.293483	3.45e-63	9.04e-59	0.993	0.82
ENSG00000231131	LNCAROD	0	0.310505	7.23e-63	1.89e-58	0.52	0.322
ENSG00000168028	RPSA	0	0.365279	9.34e-63	2.45e-58	0.991	0.845
ENSG00000198901	PRC1	0	-0.280077	1.19e-61	3.13e-57	0.277	0.492
ENSG00000255302	EID1	0	0.256737	3.96e-61	1.04e-56	0.968	0.737
ENSG00000105640	RPL18A	0	0.362067	8.54e-61	2.24e-56	0.995	0.89
ENSG00000213741	RPS29	0	0.321384	7.9e-60	2.07e-55	0.995	0.876
ENSG00000257261	AC008014.1	0	0.254933	3.64e-59	9.53e-55	0.735	0.553
ENSG00000157654	PALM2-AKAP2	0	-0.268384	9.56e-58	2.5e-53	0.121	0.33
ENSG00000140525	FANCI	0	-0.454036	3.1e-57	8.13e-53	0.569	0.682
ENSG00000229855	AC008568.1	0	0.260958	3.8e-56	9.95e-52	0.788	0.595
ENSG00000092841	MYL6	0	0.285828	3.24e-55	8.49e-51	0.984	0.777
ENSG00000164611	PTTG1	0	-0.398766	1.07e-54	2.81e-50	0.445	0.588
ENSG00000198242	RPL23A	0	0.327516	1.14e-54	3e-50	0.992	0.842
ENSG00000083845	RPS5	0	0.330088	1.9e-54	4.96e-50	0.99	0.845
ENSG00000173207	CKS1B	0	-0.324273	3.62e-54	9.49e-50	0.483	0.609
ENSG00000134057	CCNB1	0	-0.258699	3.77e-54	9.87e-50	0.164	0.367
ENSG00000048740	CELF2	0	0.254609	5.03e-54	1.32e-49	0.995	0.893
ENSG00000108298	RPL19	0	0.353908	5.63e-54	1.47e-49	0.993	0.866
ENSG00000233927	RPS28	0	0.343502	1.04e-53	2.72e-49	0.993	0.861
ENSG00000124614	RPS10	0	0.327659	7.04e-53	1.85e-48	0.992	0.818
ENSG00000115268	RPS15	0	0.336396	8.92e-53	2.34e-48	0.993	0.848
ENSG00000228716	DHFR	0	-0.270385	8.15e-52	2.14e-47	0.458	0.61
ENSG00000110700	RPS13	0	0.321534	4.93e-51	1.29e-46	0.99	0.84
ENSG00000174444	RPL4	0	0.308136	1.56e-50	4.08e-46	0.99	0.833
ENSG00000172809	RPL38	0	0.280717	3.91e-49	1.02e-44	0.991	0.845
ENSG00000152601	MBNL1	0	0.253921	7.79e-49	2.04e-44	0.993	0.882
ENSG00000131469	RPL27	0	0.308735	1.38e-48	3.6e-44	0.991	0.83
ENSG00000106462	EZH2	0	-0.335613	7e-45	1.83e-40	0.524	0.657
ENSG00000162244	RPL29	0	0.313383	3.02e-43	7.91e-39	0.996	0.856
ENSG00000092853	CLSPN	0	-0.331838	2.87e-42	7.52e-38	0.522	0.647
ENSG00000129824	RPS4Y1	0	0.259136	3.84e-42	1.01e-37	0.973	0.805
ENSG00000284906	ARHGAP11B	0	-0.309491	1.96e-40	5.14e-36	0.295	0.464
ENSG00000149806	FAU	0	0.296031	1.35e-39	3.53e-35	0.99	0.824
ENSG00000108106	UBE2S	0	-0.371133	1.39e-38	3.63e-34	0.549	0.624
ENSG00000145741	BTF3	0	0.254064	1.49e-38	3.91e-34	0.99	0.795
ENSG00000123975	CKS2	0	-0.345894	8.83e-37	2.31e-32	0.52	0.597
ENSG00000139618	BRCA2	0	-0.280784	3.5e-36	9.18e-32	0.411	0.569
ENSG00000204628	RACK1	0	0.274557	6.65e-36	1.74e-31	0.991	0.853
ENSG00000012048	BRCA1	0	-0.315422	9.97e-35	2.61e-30	0.544	0.648
ENSG00000123416	TUBA1B	0	-0.452567	1.57e-34	4.12e-30	0.979	0.821
ENSG00000105486	LIG1	0	-0.284316	1.89e-34	4.95e-30	0.48	0.612
ENSG00000146918	NCAPG2	0	-0.270733	8.37e-32	2.19e-27	0.44	0.57
ENSG00000013810	TACC3	0	-0.279066	3.02e-31	7.9e-27	0.518	0.615
ENSG00000138182	KIF20B	0	-0.260967	1.97e-30	5.17e-26	0.469	0.585
ENSG00000069275	NUCKS1	0	-0.304779	2.04e-30	5.34e-26	0.971	0.847
ENSG00000161016	RPL8	0	0.250507	2.96e-30	7.74e-26	0.993	0.844
ENSG00000105193	RPS16	0	0.251449	4.85e-29	1.27e-24	0.991	0.835
ENSG00000120802	TMPO	0	-0.306407	3.11e-28	8.14e-24	0.727	0.704
ENSG00000229989	MIR181A1HG	0	-0.302968	1.22e-25	3.2e-21	0.403	0.548
ENSG00000113810	SMC4	0	-0.312957	4.04e-25	1.06e-20	0.726	0.706
ENSG00000005381	MPO	0	-0.334965	1.59e-24	4.15e-20	0.033	0.125
ENSG00000171858	RPS21	0	0.261161	3.57e-24	9.36e-20	0.997	0.877
ENSG00000168298	HIST1H1E	0	-0.274463	7.06e-23	1.85e-18	0.314	0.431
ENSG00000196230	TUBB	0	-0.315834	7.65e-22	2e-17	0.954	0.783
ENSG00000099901	RANBP1	0	-0.29859	7.66e-22	2.01e-17	0.864	0.734
ENSG00000109685	NSD2	0	-0.422379	8.24e-21	2.16e-16	0.733	0.734
ENSG00000130816	DNMT1	0	-0.322541	2.19e-20	5.74e-16	0.806	0.789
ENSG00000101361	NOP56	0	-0.255232	1.39e-17	3.64e-13	0.86	0.773
ENSG00000109906	ZBTB16	0	-0.273452	1.26e-16	3.31e-12	0.356	0.457
ENSG00000187837	HIST1H1C	0	-0.341947	1.65e-16	4.33e-12	0.36	0.444
ENSG00000136492	BRIP1	0	-0.324522	8.74e-14	2.29e-09	0.573	0.628
ENSG00000188229	TUBB4B	0	-0.312973	1.2e-13	3.15e-09	0.834	0.715
ENSG00000196684	HSH2D	0	-0.268565	1.47e-13	3.86e-09	0.469	0.543
ENSG00000198786	MT-ND5	0	-0.512188	2.06e-13	5.39e-09	0.981	0.875
ENSG00000171791	BCL2	0	-0.35395	7.61e-13	1.99e-08	0.565	0.623
ENSG00000176208	ATAD5	0	-0.264908	8.01e-13	2.1e-08	0.618	0.65
ENSG00000164687	FABP5	0	-0.273762	1.53e-11	4e-07	0.903	0.74
ENSG00000187741	FANCA	0	-0.329265	2.69e-09	7.05e-05	0.521	0.576
ENSG00000075420	FNDC3B	0	-0.534446	4.47e-08	0.00117028	0.726	0.683
ENSG00000198899	MT-ATP6	0	-0.652591	1.29e-07	0.003388	0.998	0.953
ENSG00000169045	HNRNPH1	0	-0.259732	6.52e-07	0.0170796	0.832	0.782
ENSG00000198840	MT-ND3	0	-0.766624	8.67e-07	0.0227116	0.997	0.948
ENSG00000143476	DTL	1	0.398959	5.05e-220	1.32e-215	0.919	0.478
ENSG00000065328	MCM10	1	0.309787	7.39e-219	1.94e-214	0.844	0.374
ENSG00000228716	DHFR	1	0.421149	2.26e-212	5.91e-208	0.933	0.508
ENSG00000128951	DUT	1	0.625358	7.78e-194	2.04e-189	0.995	0.771
ENSG00000112118	MCM3	1	0.470321	1.33e-192	3.49e-188	0.965	0.636
ENSG00000132646	PCNA	1	0.396933	3.7e-177	9.7e-173	0.951	0.573
ENSG00000092853	CLSPN	1	0.36969	1.27e-174	3.32e-170	0.95	0.555
ENSG00000131153	GINS2	1	0.279027	9.02e-174	2.36e-169	0.847	0.431
ENSG00000091651	ORC6	1	0.258188	1.18e-171	3.09e-167	0.83	0.41
ENSG00000104738	MCM4	1	0.345026	1.92e-162	5.02e-158	0.946	0.569
ENSG00000116062	MSH6	1	0.314581	1.5e-153	3.93e-149	0.93	0.558
ENSG00000119969	HELLS	1	0.348005	6.95e-146	1.82e-141	0.967	0.67
ENSG00000267374	MIR924HG	1	0.522883	3.26e-132	8.53e-128	0.958	0.657
ENSG00000136492	BRIP1	1	0.250589	4.42e-130	1.16e-125	0.935	0.553
ENSG00000283674	AC068587.4	1	0.350901	3.5e-127	9.17e-123	0.961	0.657
ENSG00000128040	SPINK2	1	0.395969	2.83e-126	7.4e-122	0.959	0.624
ENSG00000213160	KLHL23	1	0.260988	5.22e-126	1.37e-121	0.912	0.564
ENSG00000117450	PRDX1	1	0.558846	7.22e-123	1.89e-118	0.996	0.78
ENSG00000176890	TYMS	1	0.39055	7.7e-119	2.02e-114	0.983	0.672
ENSG00000076003	MCM6	1	0.263345	4.8e-118	1.26e-113	0.89	0.568
ENSG00000140905	GCSH	1	0.278383	4.6e-113	1.21e-108	0.95	0.614
ENSG00000159199	ATP5MC1	1	0.414232	1.51e-112	3.94e-108	0.989	0.735
ENSG00000162607	USP1	1	0.268723	9.05e-112	2.37e-107	0.941	0.618
ENSG00000170891	CYTL1	1	0.267787	1.18e-110	3.1e-106	0.879	0.53
ENSG00000144381	HSPD1	1	0.426139	3.27e-108	8.55e-104	0.994	0.812
ENSG00000204764	RANBP17	1	0.285791	7.66e-108	2.01e-103	0.916	0.57
ENSG00000115053	NCL	1	0.441597	1.32e-104	3.45e-100	0.998	0.879
ENSG00000115541	HSPE1	1	0.394025	1.86e-104	4.88e-100	0.99	0.74
ENSG00000101200	AVP	1	0.456001	3.8e-104	9.96e-100	0.961	0.628
ENSG00000197451	HNRNPAB	1	0.401761	6.01e-104	1.58e-99	0.99	0.757
ENSG00000135446	CDK4	1	0.285878	3.59e-102	9.41e-98	0.958	0.645
ENSG00000253729	PRKDC	1	0.377995	2.69e-101	7.04e-97	0.999	0.849
ENSG00000006625	GGCT	1	0.303573	5.4e-100	1.42e-95	0.97	0.688
ENSG00000166803	PCLAF	1	0.309496	1.6e-98	4.2e-94	0.965	0.622
ENSG00000111716	LDHB	1	0.407508	1.57e-96	4.11e-92	0.997	0.813
ENSG00000164687	FABP5	1	0.371915	1.95e-94	5.11e-90	0.99	0.731
ENSG00000035928	RFC1	1	0.251148	2.1e-94	5.49e-90	0.953	0.704
ENSG00000179958	DCTPP1	1	0.254606	3.2e-93	8.39e-89	0.948	0.635
ENSG00000123131	PRDX4	1	0.281902	5.05e-93	1.32e-88	0.95	0.637
ENSG00000169442	CD52	1	0.350598	6.48e-93	1.7e-88	0.984	0.719
ENSG00000181163	NPM1	1	0.418312	6.94e-93	1.82e-88	1	0.878
ENSG00000108424	KPNB1	1	0.356643	2.42e-92	6.33e-88	0.986	0.787
ENSG00000187109	NAP1L1	1	0.386575	2.02e-91	5.28e-87	0.999	0.857
ENSG00000175768	TOMM5	1	0.308633	3.73e-91	9.77e-87	0.98	0.713
ENSG00000008394	MGST1	1	0.266928	4.93e-91	1.29e-86	0.938	0.624
ENSG00000185532	PRKG1	1	0.260772	2.16e-90	5.66e-86	0.917	0.561
ENSG00000171723	GPHN	1	0.282619	7.09e-90	1.86e-85	0.965	0.685
ENSG00000243678	NME2	1	0.452472	2.29e-89	6e-85	0.997	0.819
ENSG00000105185	PDCD5	1	0.29235	2.82e-87	7.38e-83	0.975	0.708
ENSG00000128050	PAICS	1	0.266697	3.54e-87	9.28e-83	0.957	0.689
ENSG00000180817	PPA1	1	0.289271	4.94e-87	1.29e-82	0.976	0.704
ENSG00000115875	SRSF7	1	0.333826	9.15e-87	2.4e-82	0.983	0.763
ENSG00000217555	CKLF	1	0.280666	1.6e-86	4.19e-82	0.967	0.69
ENSG00000228065	LINC01515	1	0.265026	5.03e-86	1.32e-81	0.932	0.627
ENSG00000124795	DEK	1	0.333992	3.92e-84	1.03e-79	0.997	0.821
ENSG00000099901	RANBP1	1	0.311205	6.51e-84	1.71e-79	0.984	0.717
ENSG00000089220	PEBP1	1	0.378837	7.77e-84	2.04e-79	0.995	0.776
ENSG00000204472	AIF1	1	0.359725	1.57e-83	4.12e-79	0.992	0.748
ENSG00000134333	LDHA	1	0.354145	5.79e-82	1.52e-77	0.997	0.767
ENSG00000226777	FAM30A	1	0.354921	4.19e-81	1.1e-76	0.983	0.762
ENSG00000115241	PPM1G	1	0.291898	1.28e-80	3.35e-76	0.99	0.739
ENSG00000183166	CALN1	1	0.275299	2.03e-79	5.33e-75	0.983	0.764
ENSG00000136732	GYPC	1	0.280071	4.49e-79	1.18e-74	0.964	0.689
ENSG00000051523	CYBA	1	0.356086	7.92e-79	2.07e-74	0.988	0.813
ENSG00000174059	CD34	1	0.265504	1.26e-78	3.29e-74	0.962	0.687
ENSG00000096384	HSP90AB1	1	0.391465	1.21e-77	3.17e-73	0.999	0.875
ENSG00000170515	PA2G4	1	0.308561	1.22e-77	3.19e-73	0.992	0.793
ENSG00000186153	WWOX	1	0.320068	2.34e-77	6.12e-73	0.995	0.825
ENSG00000184990	SIVA1	1	0.255284	2.8e-77	7.33e-73	0.973	0.68
ENSG00000224877	NDUFAF8	1	0.263961	4.69e-77	1.23e-72	0.958	0.68
ENSG00000108561	C1QBP	1	0.316085	7.51e-77	1.97e-72	0.985	0.746
ENSG00000239672	NME1	1	0.295743	6.34e-75	1.66e-70	0.984	0.719
ENSG00000103202	NME4	1	0.25626	2.28e-74	5.98e-70	0.969	0.684
ENSG00000065978	YBX1	1	0.369567	3.48e-74	9.13e-70	0.997	0.857
ENSG00000132780	NASP	1	0.291266	4.5e-74	1.18e-69	0.989	0.823
ENSG00000116649	SRM	1	0.267682	1.19e-72	3.11e-68	0.975	0.711
ENSG00000143799	PARP1	1	0.264399	1.34e-72	3.52e-68	0.975	0.717
ENSG00000142864	SERBP1	1	0.308744	1.59e-72	4.15e-68	0.997	0.836
ENSG00000161547	SRSF2	1	0.287541	2.95e-72	7.73e-68	0.984	0.731
ENSG00000166226	CCT2	1	0.277293	7.64e-72	2e-67	0.981	0.744
ENSG00000213585	VDAC1	1	0.283829	3.06e-71	8e-67	0.98	0.748
ENSG00000074800	ENO1	1	0.354468	1.37e-70	3.58e-66	0.999	0.86
ENSG00000109971	HSPA8	1	0.31488	6.71e-69	1.76e-64	0.992	0.77
ENSG00000196230	TUBB	1	0.293658	8.59e-69	2.25e-64	0.997	0.783
ENSG00000079246	XRCC5	1	0.306354	1.43e-68	3.74e-64	0.996	0.832
ENSG00000136810	TXN	1	0.318978	3.96e-68	1.04e-63	0.992	0.79
ENSG00000092201	SUPT16H	1	0.255639	1.69e-67	4.43e-63	0.976	0.745
ENSG00000154518	ATP5MC3	1	0.306583	3.67e-67	9.63e-63	0.989	0.746
ENSG00000106153	CHCHD2	1	0.335073	4.04e-67	1.06e-62	0.994	0.796
ENSG00000240972	MIF	1	0.364266	6.21e-67	1.63e-62	0.996	0.816
ENSG00000084207	GSTP1	1	0.333557	3.87e-66	1.01e-61	0.996	0.798
ENSG00000090266	NDUFB2	1	0.266547	4.92e-66	1.29e-61	0.983	0.739
ENSG00000145912	NHP2	1	0.25619	3.24e-65	8.49e-61	0.979	0.719
ENSG00000080824	HSP90AA1	1	0.30794	5.31e-65	1.39e-60	0.995	0.852
ENSG00000114942	EEF1B2	1	0.378974	6.06e-65	1.59e-60	1	0.84
ENSG00000146731	CCT6A	1	0.250999	4.13e-63	1.08e-58	0.976	0.745
ENSG00000169567	HINT1	1	0.34538	8.6e-63	2.25e-58	0.997	0.814
ENSG00000173457	PPP1R14B	1	0.289085	2.85e-61	7.48e-57	0.992	0.749
ENSG00000123416	TUBA1B	1	0.322353	9.71e-60	2.54e-55	0.999	0.825
ENSG00000113648	H2AFY	1	0.328461	5.33e-59	1.4e-54	0.993	0.85
ENSG00000182004	SNRPE	1	0.280395	6.48e-59	1.7e-54	0.988	0.77
ENSG00000164405	UQCRQ	1	0.259782	1.81e-58	4.74e-54	0.989	0.742
ENSG00000145494	NDUFS6	1	0.258427	2.96e-58	7.76e-54	0.982	0.76
ENSG00000119335	SET	1	0.286145	1.61e-57	4.21e-53	0.998	0.813
ENSG00000185760	KCNQ5	1	0.25561	5.95e-57	1.56e-52	0.99	0.801
ENSG00000182774	RPS17	1	0.351252	2.85e-56	7.47e-52	0.997	0.847
ENSG00000187514	PTMA	1	0.324621	3.33e-56	8.72e-52	1	0.914
ENSG00000132341	RAN	1	0.276343	4.96e-54	1.3e-49	0.993	0.768
ENSG00000161970	RPL26	1	0.369741	1.02e-53	2.67e-49	1	0.874
ENSG00000127184	COX7C	1	0.310938	1.88e-53	4.93e-49	0.996	0.794
ENSG00000180879	SSR4	1	0.256219	4.97e-53	1.3e-48	0.992	0.752
ENSG00000171863	RPS7	1	0.358857	1.79e-52	4.7e-48	1	0.863
ENSG00000167088	SNRPD1	1	0.254451	3.05e-52	7.98e-48	0.992	0.782
ENSG00000138326	RPS24	1	0.332949	1.93e-49	5.05e-45	1	0.899
ENSG00000173660	UQCRH	1	0.265094	3.86e-49	1.01e-44	0.995	0.808
ENSG00000143549	TPM3	1	0.263032	9.17e-48	2.4e-43	0.997	0.827
ENSG00000100316	RPL3	1	0.341373	3.86e-47	1.01e-42	1	0.887
ENSG00000198034	RPS4X	1	0.336843	1.24e-46	3.25e-42	1	0.867
ENSG00000122406	RPL5	1	0.325885	2.16e-46	5.65e-42	1	0.884
ENSG00000231500	RPS18	1	0.350919	2.26e-46	5.91e-42	1	0.902
ENSG00000005022	SLC25A5	1	0.265615	6.04e-46	1.58e-41	0.997	0.764
ENSG00000171858	RPS21	1	0.333077	3.12e-45	8.17e-41	1	0.882
ENSG00000164919	COX6C	1	0.263049	5.45e-45	1.43e-40	0.992	0.788
ENSG00000145425	RPS3A	1	0.323955	2.89e-44	7.58e-40	1	0.884
ENSG00000147604	RPL7	1	0.316088	6.55e-44	1.72e-39	0.998	0.831
ENSG00000145741	BTF3	1	0.284823	2.2e-43	5.76e-39	0.996	0.803
ENSG00000265681	RPL17	1	0.321267	7.82e-43	2.05e-38	1	0.864
ENSG00000164587	RPS14	1	0.332071	1.24e-42	3.24e-38	1	0.878
ENSG00000112306	RPS12	1	0.33263	1.6e-42	4.2e-38	1	0.911
ENSG00000166441	RPL27A	1	0.314421	2.25e-42	5.9e-38	0.999	0.856
ENSG00000186468	RPS23	1	0.329985	3.51e-41	9.19e-37	1	0.889
ENSG00000148303	RPL7A	1	0.331744	1.23e-40	3.22e-36	1	0.859
ENSG00000142937	RPS8	1	0.319765	3.26e-40	8.55e-36	1	0.898
ENSG00000137154	RPS6	1	0.308667	9.33e-40	2.44e-35	1	0.893
ENSG00000174444	RPL4	1	0.293559	1.62e-39	4.25e-35	0.998	0.839
ENSG00000140988	RPS2	1	0.33249	1.96e-39	5.14e-35	1	0.898
ENSG00000254772	EEF1G	1	0.284613	3.17e-39	8.32e-35	1	0.838
ENSG00000175061	SNHG29	1	0.288452	5.5e-39	1.44e-34	0.997	0.851
ENSG00000133112	TPT1	1	0.26974	7.13e-39	1.87e-34	1	0.879
ENSG00000149273	RPS3	1	0.319587	7.73e-39	2.02e-34	1	0.87
ENSG00000197061	HIST1H4C	1	-0.776047	1.09e-38	2.86e-34	0.994	0.756
ENSG00000142676	RPL11	1	0.311084	1.86e-38	4.88e-34	1	0.883
ENSG00000162244	RPL29	1	0.31134	1.91e-38	5e-34	0.999	0.862
ENSG00000109475	RPL34	1	0.286649	9.16e-38	2.4e-33	1	0.89
ENSG00000156482	RPL30	1	0.303077	3.83e-37	1e-32	1	0.86
ENSG00000089157	RPLP0	1	0.294567	5.9e-37	1.54e-32	0.999	0.875
ENSG00000125691	RPL23	1	0.27795	1.41e-36	3.69e-32	0.998	0.836
ENSG00000122026	RPL21	1	0.290033	2.82e-36	7.38e-32	1	0.89
ENSG00000114391	RPL24	1	0.295147	6.58e-36	1.72e-31	0.998	0.845
ENSG00000188846	RPL14	1	0.287236	8.41e-36	2.2e-31	1	0.868
ENSG00000105372	RPS19	1	0.304906	8.73e-36	2.29e-31	1	0.897
ENSG00000130255	RPL36	1	0.292783	1.53e-35	4.01e-31	1	0.876
ENSG00000182899	RPL35A	1	0.295374	1.91e-35	5.01e-31	0.998	0.855
ENSG00000131469	RPL27	1	0.279244	5.61e-35	1.47e-30	0.998	0.837
ENSG00000105193	RPS16	1	0.288331	1.26e-34	3.3e-30	0.999	0.841
ENSG00000198755	RPL10A	1	0.28316	1.67e-34	4.36e-30	1	0.844
ENSG00000105640	RPL18A	1	0.287152	1.72e-34	4.49e-30	1	0.894
ENSG00000142541	RPL13A	1	0.279335	1.95e-34	5.11e-30	1	0.872
ENSG00000170889	RPS9	1	0.286411	1.97e-34	5.16e-30	0.999	0.865
ENSG00000116251	RPL22	1	0.266774	2.36e-34	6.18e-30	0.999	0.863
ENSG00000168028	RPSA	1	0.28301	3.19e-34	8.35e-30	1	0.851
ENSG00000198918	RPL39	1	0.303167	3.81e-34	9.99e-30	0.999	0.879
ENSG00000136942	RPL35	1	0.274497	4.08e-34	1.07e-29	0.998	0.879
ENSG00000163682	RPL9	1	0.283237	1.42e-33	3.73e-29	1	0.86
ENSG00000083845	RPS5	1	0.272101	3.33e-33	8.73e-29	0.999	0.85
ENSG00000167526	RPL13	1	0.284172	3.62e-33	9.49e-29	1	0.914
ENSG00000144713	RPL32	1	0.283785	8.52e-33	2.23e-28	1	0.891
ENSG00000197756	RPL37A	1	0.300709	4.97e-32	1.3e-27	0.999	0.876
ENSG00000147403	RPL10	1	0.288299	1.43e-31	3.74e-27	0.999	0.861
ENSG00000134419	RPS15A	1	0.282469	6.77e-31	1.77e-26	1	0.86
ENSG00000156508	EEF1A1	1	0.278692	7.61e-31	1.99e-26	1	0.928
ENSG00000063177	RPL18	1	0.279761	3.41e-30	8.93e-26	0.999	0.847
ENSG00000196531	NACA	1	0.251408	8.37e-30	2.19e-25	0.999	0.846
ENSG00000145592	RPL37	1	0.284577	2.43e-29	6.36e-25	1	0.887
ENSG00000108298	RPL19	1	0.273321	4.4e-28	1.15e-23	0.999	0.871
ENSG00000241343	RPL36A	1	0.252421	1e-27	2.63e-23	1	0.854
ENSG00000110700	RPS13	1	0.262483	9.32e-27	2.44e-22	1	0.845
ENSG00000137818	RPLP1	1	0.266841	1.07e-26	2.8e-22	1	0.92
ENSG00000143947	RPS27A	1	0.269128	1.29e-26	3.38e-22	1	0.882
ENSG00000115268	RPS15	1	0.251479	2.39e-26	6.26e-22	0.999	0.853
ENSG00000118181	RPS25	1	0.254187	5.21e-26	1.36e-21	0.998	0.847
ENSG00000124614	RPS10	1	0.257135	1.23e-25	3.21e-21	0.997	0.826
ENSG00000233927	RPS28	1	0.26868	3.14e-25	8.22e-21	1	0.866
ENSG00000197958	RPL12	1	0.25424	3.78e-25	9.91e-21	1	0.895
ENSG00000174748	RPL15	1	0.252237	9.39e-25	2.46e-20	1	0.849
ENSG00000198727	MT-CYB	1	-0.849551	4.91e-13	1.29e-08	0.999	0.92
ENSG00000125257	ABCC4	1	-0.252917	2.28e-12	5.98e-08	0.848	0.622
ENSG00000150347	ARID5B	1	-0.297816	3.45e-09	9.04e-05	0.434	0.46
ENSG00000175265	GOLGA8A	1	-0.278128	6.42e-09	0.000168074	0.636	0.473
ENSG00000174501	ANKRD36C	1	-0.343271	2.28e-07	0.00598462	0.794	0.61
ENSG00000075420	FNDC3B	1	-0.347874	4.96e-07	0.0129802	0.868	0.657
ENSG00000066279	ASPM	1	-0.269313	1.03e-06	0.0270136	0.558	0.377
ENSG00000197061	HIST1H4C	2	2.22428	0	0	0.992	0.766
ENSG00000131747	TOP2A	2	1.08711	0	0	0.99	0.451
ENSG00000184357	HIST1H1B	2	1.08607	0	0	0.915	0.198
ENSG00000148773	MKI67	2	0.954409	0	0	0.987	0.382
ENSG00000137804	NUSAP1	2	0.730778	0	0	0.988	0.486
ENSG00000089685	BIRC5	2	0.61031	0	0	0.972	0.343
ENSG00000175063	UBE2C	2	0.575218	0	0	0.917	0.277
ENSG00000276368	HIST1H2AJ	2	0.562533	0	0	0.882	0.162
ENSG00000286522	HIST1H3B	2	0.494917	0	0	0.847	0.152
ENSG00000197409	HIST1H3D	2	0.467998	0	0	0.761	0.181
ENSG00000080986	NDC80	2	0.422081	0	0	0.909	0.265
ENSG00000170312	CDK1	2	0.417068	0	0	0.897	0.256
ENSG00000178999	AURKB	2	0.353103	0	0	0.864	0.196
ENSG00000184661	CDCA2	2	0.305965	0	0	0.752	0.179
ENSG00000274997	HIST1H2AH	2	0.262115	0	0	0.66	0.133
ENSG00000187837	HIST1H1C	2	0.639563	7.49e-302	1.96e-297	0.913	0.353
ENSG00000186185	KIF18B	2	0.288427	1.48e-301	3.88e-297	0.843	0.234
ENSG00000137807	KIF23	2	0.275079	2.39e-301	6.27e-297	0.746	0.181
ENSG00000126787	DLGAP5	2	0.393877	7.99e-301	2.09e-296	0.778	0.2
ENSG00000088325	TPX2	2	0.672886	1.08e-299	2.83e-295	0.966	0.449
ENSG00000090889	KIF4A	2	0.314852	5.88e-295	1.54e-290	0.843	0.246
ENSG00000138160	KIF11	2	0.449535	1.13e-290	2.96e-286	0.933	0.365
ENSG00000145386	CCNA2	2	0.294524	4.97e-289	1.3e-284	0.777	0.208
ENSG00000152253	SPC25	2	0.417022	2.18e-287	5.72e-283	0.926	0.335
ENSG00000124610	HIST1H1A	2	0.275932	6.76e-285	1.77e-280	0.579	0.108
ENSG00000066279	ASPM	2	0.598329	5.27e-284	1.38e-279	0.915	0.33
ENSG00000075218	GTSE1	2	0.34926	2.19e-283	5.74e-279	0.847	0.259
ENSG00000134690	CDCA8	2	0.349434	6.66e-283	1.74e-278	0.82	0.249
ENSG00000011426	ANLN	2	0.289454	1.93e-282	5.06e-278	0.796	0.22
ENSG00000168298	HIST1H1E	2	0.520783	1.48e-279	3.87e-275	0.881	0.335
ENSG00000169607	CKAP2L	2	0.255025	9.9e-279	2.59e-274	0.726	0.185
ENSG00000117724	CENPF	2	0.887751	2.66e-277	6.98e-273	0.987	0.495
ENSG00000109805	NCAPG	2	0.309256	4.97e-277	1.3e-272	0.866	0.269
ENSG00000072571	HMMR	2	0.361227	1.47e-266	3.84e-262	0.678	0.161
ENSG00000196787	HIST1H2AG	2	0.270703	3.39e-265	8.87e-261	0.638	0.148
ENSG00000184260	HIST2H2AC	2	0.556885	7.73e-260	2.02e-255	0.829	0.287
ENSG00000111206	FOXM1	2	0.275248	2.44e-255	6.38e-251	0.832	0.269
ENSG00000142945	KIF2C	2	0.267345	1.1e-254	2.88e-250	0.82	0.249
ENSG00000163808	KIF15	2	0.334262	4.29e-245	1.12e-240	0.902	0.34
ENSG00000137812	KNL1	2	0.352377	1.06e-244	2.78e-240	0.894	0.35
ENSG00000164104	HMGB2	2	0.832959	1.37e-243	3.58e-239	0.996	0.706
ENSG00000198826	ARHGAP11A	2	0.319707	2.82e-243	7.39e-239	0.848	0.309
ENSG00000188486	H2AFX	2	0.336464	7.99e-240	2.09e-235	0.891	0.342
ENSG00000165480	SKA3	2	0.261289	4.8e-239	1.26e-234	0.843	0.29
ENSG00000068489	PRR11	2	0.266054	8.64e-233	2.26e-228	0.748	0.224
ENSG00000118193	KIF14	2	0.29132	1.08e-232	2.83e-228	0.812	0.269
ENSG00000196230	TUBB	2	0.78722	2.78e-231	7.28e-227	0.999	0.791
ENSG00000138778	CENPE	2	0.405583	2.16e-229	5.66e-225	0.836	0.3
ENSG00000124575	HIST1H1D	2	0.912397	8.68e-227	2.27e-222	0.901	0.442
ENSG00000146670	CDCA5	2	0.256328	1.27e-219	3.32e-215	0.818	0.285
ENSG00000010292	NCAPD2	2	0.292581	5.26e-218	1.38e-213	0.87	0.35
ENSG00000156970	BUB1B	2	0.315959	6.5e-218	1.7e-213	0.895	0.382
ENSG00000167900	TK1	2	0.3457	2.98e-214	7.81e-210	0.876	0.34
ENSG00000198901	PRC1	2	0.317891	3.55e-212	9.3e-208	0.889	0.381
ENSG00000100526	CDKN3	2	0.389529	4.41e-212	1.15e-207	0.874	0.357
ENSG00000171848	RRM2	2	0.368093	4.92e-210	1.29e-205	0.958	0.41
ENSG00000165304	MELK	2	0.26047	1.87e-207	4.89e-203	0.81	0.284
ENSG00000123975	CKS2	2	0.503227	2.04e-204	5.34e-200	0.964	0.523
ENSG00000284906	ARHGAP11B	2	0.354845	3.58e-203	9.37e-199	0.867	0.363
ENSG00000113810	SMC4	2	0.516783	1.49e-198	3.91e-194	0.987	0.668
ENSG00000189403	HMGB1	2	0.692325	1.61e-198	4.22e-194	1	0.896
ENSG00000139734	DIAPH3	2	0.429463	4.62e-194	1.21e-189	0.953	0.447
ENSG00000101057	MYBL2	2	0.300056	2.49e-193	6.53e-189	0.894	0.363
ENSG00000136108	CKAP2	2	0.364986	1.67e-187	4.36e-183	0.928	0.476
ENSG00000176890	TYMS	2	0.656782	1.81e-187	4.74e-183	0.991	0.683
ENSG00000198830	HMGN2	2	0.695598	4.99e-187	1.31e-182	1	0.834
ENSG00000122966	CIT	2	0.261064	7.54e-185	1.97e-180	0.861	0.359
ENSG00000173207	CKS1B	2	0.406444	2.13e-183	5.57e-179	0.965	0.525
ENSG00000166803	PCLAF	2	0.61788	8.58e-181	2.25e-176	0.987	0.632
ENSG00000121211	MND1	2	0.284945	1.4e-179	3.67e-175	0.909	0.394
ENSG00000164032	H2AFZ	2	0.755881	1.75e-175	4.59e-171	0.994	0.784
ENSG00000111247	RAD51AP1	2	0.289755	2.86e-175	7.49e-171	0.909	0.413
ENSG00000013810	TACC3	2	0.300723	8.19e-173	2.15e-168	0.951	0.541
ENSG00000117632	STMN1	2	0.608027	2.66e-171	6.97e-167	0.998	0.778
ENSG00000227598	Z94721.1	2	0.258809	3.14e-170	8.23e-166	0.895	0.391
ENSG00000120802	TMPO	2	0.453927	6.58e-158	1.72e-153	0.988	0.667
ENSG00000203760	CENPW	2	0.31887	1.56e-157	4.09e-153	0.947	0.494
ENSG00000188229	TUBB4B	2	0.553712	9.8e-155	2.57e-150	0.992	0.702
ENSG00000134057	CCNB1	2	0.31456	9.22e-153	2.42e-148	0.706	0.267
ENSG00000182481	KPNA2	2	0.350201	1.44e-150	3.76e-146	0.839	0.41
ENSG00000229140	CCDC26	2	0.271168	3.61e-147	9.47e-143	0.638	0.222
ENSG00000069275	NUCKS1	2	0.531241	1.57e-145	4.12e-141	1	0.853
ENSG00000108106	UBE2S	2	0.369411	1.46e-142	3.83e-138	0.952	0.557
ENSG00000123416	TUBA1B	2	0.667265	3.08e-138	8.08e-134	0.998	0.832
ENSG00000143401	ANP32E	2	0.327278	1.1e-136	2.89e-132	0.958	0.586
ENSG00000138182	KIF20B	2	0.335887	1.46e-132	3.82e-128	0.91	0.509
ENSG00000168393	DTYMK	2	0.267026	1.77e-131	4.64e-127	0.937	0.515
ENSG00000164109	MAD2L1	2	0.26234	1.5e-129	3.94e-125	0.898	0.455
ENSG00000167325	RRM1	2	0.341994	8.42e-126	2.21e-121	0.956	0.587
ENSG00000228716	DHFR	2	0.329647	7.95e-125	2.08e-120	0.929	0.526
ENSG00000164611	PTTG1	2	0.315215	1.77e-123	4.63e-119	0.926	0.503
ENSG00000170540	ARL6IP1	2	0.443433	3.78e-123	9.91e-119	0.937	0.577
ENSG00000136824	SMC2	2	0.293348	2.58e-121	6.76e-117	0.96	0.591
ENSG00000128951	DUT	2	0.526138	3.91e-116	1.02e-111	0.997	0.78
ENSG00000092621	PHGDH	2	0.308272	1.27e-108	3.32e-104	0.958	0.591
ENSG00000156802	ATAD2	2	0.340448	9.42e-108	2.47e-103	0.962	0.635
ENSG00000164754	RAD21	2	0.296033	1.1e-101	2.89e-97	0.96	0.644
ENSG00000184990	SIVA1	2	0.362878	7.01e-98	1.84e-93	0.977	0.69
ENSG00000129534	MIS18BP1	2	0.284772	1.34e-95	3.51e-91	0.973	0.707
ENSG00000136938	ANP32B	2	0.401483	4.12e-95	1.08e-90	1	0.854
ENSG00000167553	TUBA1C	2	0.368893	4.22e-92	1.11e-87	0.982	0.703
ENSG00000143933	CALM2	2	0.39524	3.62e-88	9.48e-84	0.997	0.812
ENSG00000189159	JPT1	2	0.263681	6.82e-88	1.79e-83	0.925	0.582
ENSG00000105968	H2AFV	2	0.269253	2.91e-84	7.61e-80	0.984	0.724
ENSG00000130520	LSM4	2	0.264986	7.88e-82	2.07e-77	0.969	0.655
ENSG00000132646	PCNA	2	0.311247	2.03e-81	5.32e-77	0.928	0.592
ENSG00000124795	DEK	2	0.346677	1.95e-74	5.1e-70	0.995	0.828
ENSG00000099901	RANBP1	2	0.342048	2.55e-73	6.67e-69	0.99	0.726
ENSG00000108055	SMC3	2	0.262242	1.1e-71	2.88e-67	0.97	0.701
ENSG00000100219	XBP1	2	0.277825	2.47e-71	6.47e-67	0.971	0.665
ENSG00000183011	NAA38	2	0.280232	1.28e-70	3.34e-66	0.986	0.72
ENSG00000143977	SNRPG	2	0.308809	1.93e-70	5.06e-66	0.994	0.772
ENSG00000119335	SET	2	0.373604	3.1e-68	8.12e-64	0.998	0.821
ENSG00000143799	PARP1	2	0.272034	5.51e-62	1.44e-57	0.983	0.726
ENSG00000111639	MRPL51	2	0.273838	7.58e-61	1.99e-56	0.984	0.718
ENSG00000115241	PPM1G	2	0.28454	5.24e-60	1.37e-55	0.986	0.75
ENSG00000213145	CRIP1	2	0.276506	1.6e-58	4.2e-54	0.956	0.643
ENSG00000167460	TPM4	2	0.254029	8.68e-58	2.27e-53	0.99	0.754
ENSG00000176340	COX8A	2	0.250294	1.82e-57	4.76e-53	0.992	0.745
ENSG00000197451	HNRNPAB	2	0.318013	9.09e-56	2.38e-51	0.987	0.767
ENSG00000188612	SUMO2	2	0.292163	7e-55	1.83e-50	0.989	0.801
ENSG00000187514	PTMA	2	0.359648	1.76e-54	4.61e-50	1	0.917
ENSG00000070081	NUCB2	2	0.258536	6.49e-51	1.7e-46	0.996	0.778
ENSG00000196262	PPIA	2	0.276154	2.82e-49	7.38e-45	0.997	0.836
ENSG00000125835	SNRPB	2	0.278224	1.79e-48	4.69e-44	0.996	0.78
ENSG00000051523	CYBA	2	0.314149	1.83e-48	4.79e-44	0.996	0.819
ENSG00000110958	PTGES3	2	0.252044	2.22e-48	5.82e-44	0.992	0.812
ENSG00000164687	FABP5	2	0.269006	1.69e-46	4.42e-42	0.989	0.741
ENSG00000111775	COX6A1	2	0.250629	2.32e-46	6.08e-42	0.994	0.755
ENSG00000170515	PA2G4	2	0.267038	2.74e-46	7.18e-42	0.995	0.801
ENSG00000005022	SLC25A5	2	0.303331	1.09e-45	2.85e-41	0.992	0.774
ENSG00000108424	KPNB1	2	0.272806	3.57e-43	9.36e-39	0.989	0.794
ENSG00000080824	HSP90AA1	2	0.305422	1.72e-41	4.51e-37	0.998	0.857
ENSG00000167088	SNRPD1	2	0.250835	2.26e-41	5.93e-37	0.996	0.79
ENSG00000115053	NCL	2	0.28774	2.71e-41	7.09e-37	0.998	0.884
ENSG00000132341	RAN	2	0.263655	2.66e-40	6.97e-36	0.997	0.776
ENSG00000111640	GAPDH	2	0.27783	2.73e-35	7.15e-31	1	0.89
ENSG00000240972	MIF	2	0.280431	1.05e-33	2.76e-29	0.998	0.823
ENSG00000074800	ENO1	2	0.267007	1.49e-33	3.9e-29	0.999	0.865
ENSG00000065978	YBX1	2	0.27206	3.12e-32	8.16e-28	0.999	0.863
ENSG00000172757	CFL1	2	0.250234	8.72e-30	2.29e-25	0.999	0.81
ENSG00000163041	H3F3A	2	0.268779	9.27e-27	2.43e-22	0.999	0.827
ENSG00000108306	FBXL20	2	-0.330468	4.29e-15	1.12e-10	0.527	0.53
ENSG00000198695	MT-ND6	2	-0.470356	2.41e-14	6.31e-10	0.838	0.59
ENSG00000198589	LRBA	2	-0.434956	2.28e-11	5.98e-07	0.991	0.846
ENSG00000197956	S100A6	2	-0.601023	1.38e-08	0.000361625	0.967	0.76
ENSG00000198712	MT-CO2	2	-0.77988	6.5e-07	0.0170257	1	0.969
ENSG00000198886	MT-ND4	2	-0.303521	1.7e-06	0.0445479	0.999	0.932
ENSG00000125995	ROMO1	3	-0.815342	0	0	0.024	0.847
ENSG00000203907	OOEP	3	-0.817372	0	0	0.03	0.858
ENSG00000065518	NDUFB4	3	-0.860181	0	0	0.019	0.841
ENSG00000118680	MYL12B	3	-0.917209	0	0	0.044	0.879
ENSG00000126756	UXT	3	-0.931036	0	0	0.044	0.88
ENSG00000188243	COMMD6	3	-0.950018	0	0	0.034	0.869
ENSG00000134825	TMEM258	3	-0.95608	0	0	0.035	0.868
ENSG00000147123	NDUFB11	3	-0.95713	0	0	0.032	0.861
ENSG00000128524	ATP6V1F	3	-0.971553	0	0	0.027	0.864
ENSG00000228474	OST4	3	-0.979316	0	0	0.035	0.875
ENSG00000125534	PPDPF	3	-1.00108	0	0	0.032	0.867
ENSG00000169230	PRELID1	3	-1.00785	0	0	0.027	0.855
ENSG00000176340	COX8A	3	-1.01266	0	0	0.041	0.872
ENSG00000171159	C9orf16	3	-1.01798	0	0	0.041	0.874
ENSG00000127922	SEM1	3	-1.02624	0	0	0.057	0.896
ENSG00000090266	NDUFB2	3	-1.03873	0	0	0.041	0.874
ENSG00000214736	TOMM6	3	-1.09464	0	0	0.039	0.875
ENSG00000008018	PSMB1	3	-1.09957	0	0	0.047	0.885
ENSG00000241468	ATP5MF	3	-1.12218	0	0	0.047	0.885
ENSG00000103363	ELOB	3	-1.13368	0	0	0.049	0.894
ENSG00000177700	POLR2L	3	-1.14311	0	0	0.039	0.876
ENSG00000135940	COX5B	3	-1.15646	0	0	0.051	0.885
ENSG00000111775	COX6A1	3	-1.15659	0	0	0.046	0.881
ENSG00000143977	SNRPG	3	-1.16194	0	0	0.059	0.896
ENSG00000159199	ATP5MC1	3	-1.17644	0	0	0.042	0.871
ENSG00000104904	OAZ1	3	-1.18358	0	0	0.069	0.909
ENSG00000184076	UQCR10	3	-1.1858	0	0	0.035	0.883
ENSG00000127540	UQCR11	3	-1.19477	0	0	0.056	0.899
ENSG00000198258	UBL5	3	-1.20985	0	0	0.037	0.889
ENSG00000131174	COX7B	3	-1.21328	0	0	0.046	0.886
ENSG00000173915	ATP5MD	3	-1.22063	0	0	0.056	0.894
ENSG00000156467	UQCRB	3	-1.236	0	0	0.035	0.899
ENSG00000164405	UQCRQ	3	-1.25213	0	0	0.04	0.878
ENSG00000126267	COX6B1	3	-1.32452	0	0	0.056	0.904
ENSG00000196683	TOMM7	3	-1.33977	0	0	0.06	0.906
ENSG00000170315	UBB	3	-1.34394	0	0	0.072	0.901
ENSG00000112695	COX7A2	3	-1.37896	0	0	0.046	0.901
ENSG00000140264	SERF2	3	-1.39762	0	0	0.071	0.915
ENSG00000164919	COX6C	3	-1.4282	0	0	0.085	0.916
ENSG00000165502	RPL36AL	3	-1.4718	0	0	0.087	0.913
ENSG00000204472	AIF1	3	-1.47198	0	0	0.046	0.883
ENSG00000167283	ATP5MG	3	-1.49272	0	0	0.101	0.923
ENSG00000005022	SLC25A5	3	-1.4948	0	0	0.062	0.897
ENSG00000140319	SRP14	3	-1.49822	0	0	0.091	0.92
ENSG00000189043	NDUFA4	3	-1.53403	0	0	0.062	0.906
ENSG00000232112	TMA7	3	-1.58413	0	0	0.092	0.929
ENSG00000169100	SLC25A6	3	-1.59192	0	0	0.092	0.918
ENSG00000204287	HLA-DRA	3	-1.59698	0	0	0.055	0.882
ENSG00000196262	PPIA	3	-1.59794	0	0	0.168	0.945
ENSG00000197956	S100A6	3	-1.62591	0	0	0.046	0.881
ENSG00000102317	RBM3	3	-1.64329	0	0	0.136	0.931
ENSG00000131143	COX4I1	3	-1.64517	0	0	0.057	0.917
ENSG00000084207	GSTP1	3	-1.6629	0	0	0.112	0.923
ENSG00000136810	TXN	3	-1.7365	0	0	0.097	0.916
ENSG00000106153	CHCHD2	3	-1.77542	0	0	0.081	0.924
ENSG00000172757	CFL1	3	-1.78226	0	0	0.11	0.927
ENSG00000071082	RPL31	3	-1.81828	0	0	0.155	0.933
ENSG00000124172	ATP5F1E	3	-1.83968	0	0	0.117	0.929
ENSG00000127184	COX7C	3	-1.84864	0	0	0.089	0.922
ENSG00000169567	HINT1	3	-1.88698	0	0	0.147	0.933
ENSG00000254772	EEF1G	3	-1.89074	0	0	0.213	0.948
ENSG00000145741	BTF3	3	-1.89917	0	0	0.126	0.926
ENSG00000174444	RPL4	3	-1.91178	0	0	0.196	0.951
ENSG00000184009	ACTG1	3	-1.91529	0	0	0.175	0.937
ENSG00000173812	EIF1	3	-1.91572	0	0	0.108	0.932
ENSG00000166710	B2M	3	-1.9292	0	0	0.209	0.938
ENSG00000163041	H3F3A	3	-1.96207	0	0	0.143	0.94
ENSG00000203875	SNHG5	3	-1.98177	0	0	0.128	0.939
ENSG00000034510	TMSB10	3	-1.98428	0	0	0.12	0.932
ENSG00000221983	UBA52	3	-2.00329	0	0	0.182	0.944
ENSG00000205542	TMSB4X	3	-2.01184	0	0	0.188	0.943
ENSG00000240972	MIF	3	-2.08437	0	0	0.158	0.933
ENSG00000182774	RPS17	3	-2.08538	0	0	0.236	0.953
ENSG00000142541	RPL13A	3	-2.08681	0	0	0.339	0.964
ENSG00000142669	SH3BGRL3	3	-2.10474	0	0	0.086	0.924
ENSG00000187514	PTMA	3	-2.1125	0	0	0.519	0.98
ENSG00000172809	RPL38	3	-2.12156	0	0	0.239	0.956
ENSG00000142534	RPS11	3	-2.12803	0	0	0.283	0.958
ENSG00000008988	RPS20	3	-2.13236	0	0	0.18	0.944
ENSG00000175061	SNHG29	3	-2.15092	0	0	0.268	0.952
ENSG00000116251	RPL22	3	-2.15668	0	0	0.307	0.959
ENSG00000147604	RPL7	3	-2.2258	0	0	0.197	0.943
ENSG00000243678	NME2	3	-2.25184	0	0	0.161	0.936
ENSG00000204628	RACK1	3	-2.25819	0	0	0.267	0.96
ENSG00000177600	RPLP2	3	-2.26265	0	0	0.388	0.968
ENSG00000196531	NACA	3	-2.27721	0	0	0.214	0.955
ENSG00000125691	RPL23	3	-2.29475	0	0	0.202	0.947
ENSG00000131469	RPL27	3	-2.34002	0	0	0.201	0.948
ENSG00000167996	FTH1	3	-2.34709	0	0	0.142	0.938
ENSG00000161016	RPL8	3	-2.35066	0	0	0.252	0.954
ENSG00000111640	GAPDH	3	-2.35492	0	0	0.414	0.967
ENSG00000168028	RPSA	3	-2.36065	0	0	0.244	0.956
ENSG00000198242	RPL23A	3	-2.39314	0	0	0.234	0.954
ENSG00000166441	RPL27A	3	-2.4131	0	0	0.273	0.957
ENSG00000188846	RPL14	3	-2.43878	0	0	0.305	0.964
ENSG00000114942	EEF1B2	3	-2.47715	0	0	0.217	0.95
ENSG00000124614	RPS10	3	-2.48116	0	0	0.162	0.942
ENSG00000136942	RPL35	3	-2.4978	0	0	0.352	0.968
ENSG00000118181	RPS25	3	-2.50472	0	0	0.246	0.952
ENSG00000197728	RPS26	3	-2.53174	0	0	0.204	0.949
ENSG00000241343	RPL36A	3	-2.55541	0	0	0.271	0.956
ENSG00000198755	RPL10A	3	-2.56366	0	0	0.234	0.951
ENSG00000089009	RPL6	3	-2.56921	0	0	0.314	0.96
ENSG00000105193	RPS16	3	-2.5869	0	0	0.208	0.952
ENSG00000122406	RPL5	3	-2.5892	0	0	0.382	0.97
ENSG00000114391	RPL24	3	-2.60256	0	0	0.213	0.954
ENSG00000105640	RPL18A	3	-2.63111	0	0	0.43	0.973
ENSG00000130255	RPL36	3	-2.63824	0	0	0.349	0.966
ENSG00000089157	RPLP0	3	-2.65146	0	0	0.335	0.967
ENSG00000170889	RPS9	3	-2.67713	0	0	0.291	0.963
ENSG00000156508	EEF1A1	3	-2.71079	0	0	0.6	0.983
ENSG00000083845	RPS5	3	-2.71579	0	0	0.228	0.957
ENSG00000108107	RPL28	3	-2.72042	0	0	0.454	0.973
ENSG00000163682	RPL9	3	-2.73251	0	0	0.284	0.96
ENSG00000087086	FTL	3	-2.73437	0	0	0.208	0.945
ENSG00000138326	RPS24	3	-2.73785	0	0	0.453	0.975
ENSG00000122026	RPL21	3	-2.74248	0	0	0.41	0.972
ENSG00000197958	RPL12	3	-2.75904	0	0	0.449	0.972
ENSG00000149806	FAU	3	-2.78612	0	0	0.158	0.947
ENSG00000171863	RPS7	3	-2.80093	0	0	0.303	0.96
ENSG00000265681	RPL17	3	-2.80693	0	0	0.304	0.961
ENSG00000174748	RPL15	3	-2.81553	0	0	0.247	0.954
ENSG00000171858	RPS21	3	-2.81767	0	0	0.354	0.971
ENSG00000100316	RPL3	3	-2.81899	0	0	0.405	0.97
ENSG00000182899	RPL35A	3	-2.83203	0	0	0.279	0.955
ENSG00000162244	RPL29	3	-2.83781	0	0	0.291	0.96
ENSG00000137154	RPS6	3	-2.84994	0	0	0.419	0.974
ENSG00000110700	RPS13	3	-2.85461	0	0	0.234	0.952
ENSG00000063177	RPL18	3	-2.85525	0	0	0.253	0.951
ENSG00000145592	RPL37	3	-2.86433	0	0	0.413	0.969
ENSG00000115268	RPS15	3	-2.86613	0	0	0.254	0.957
ENSG00000167526	RPL13	3	-2.87069	0	0	0.554	0.976
ENSG00000145425	RPS3A	3	-2.87572	0	0	0.406	0.966
ENSG00000134419	RPS15A	3	-2.89227	0	0	0.3	0.958
ENSG00000213741	RPS29	3	-2.90726	0	0	0.363	0.969
ENSG00000144713	RPL32	3	-2.90987	0	0	0.439	0.969
ENSG00000233927	RPS28	3	-2.95101	0	0	0.313	0.961
ENSG00000109475	RPL34	3	-2.95497	0	0	0.401	0.973
ENSG00000108298	RPL19	3	-2.95768	0	0	0.334	0.964
ENSG00000105372	RPS19	3	-2.96044	0	0	0.434	0.975
ENSG00000198918	RPL39	3	-2.97065	0	0	0.357	0.968
ENSG00000197756	RPL37A	3	-2.98162	0	0	0.325	0.969
ENSG00000149273	RPS3	3	-2.99475	0	0	0.33	0.963
ENSG00000143947	RPS27A	3	-3.00731	0	0	0.397	0.966
ENSG00000177954	RPS27	3	-3.0308	0	0	0.35	0.965
ENSG00000133112	TPT1	3	-3.04406	0	0	0.372	0.966
ENSG00000148303	RPL7A	3	-3.05254	0	0	0.296	0.957
ENSG00000198034	RPS4X	3	-3.07289	0	0	0.317	0.962
ENSG00000156482	RPL30	3	-3.08139	0	0	0.291	0.959
ENSG00000142937	RPS8	3	-3.09651	0	0	0.451	0.973
ENSG00000164587	RPS14	3	-3.11751	0	0	0.367	0.966
ENSG00000142676	RPL11	3	-3.16258	0	0	0.353	0.973
ENSG00000229117	RPL41	3	-3.17161	0	0	0.43	0.969
ENSG00000147403	RPL10	3	-3.19754	0	0	0.293	0.959
ENSG00000140988	RPS2	3	-3.21419	0	0	0.453	0.974
ENSG00000161970	RPL26	3	-3.21481	0	0	0.344	0.965
ENSG00000186468	RPS23	3	-3.30003	0	0	0.42	0.969
ENSG00000137818	RPLP1	3	-3.31295	0	0	0.546	0.983
ENSG00000112306	RPS12	3	-3.32566	0	0	0.517	0.977
ENSG00000231500	RPS18	3	-3.43488	0	0	0.485	0.973
ENSG00000269893	SNHG8	3	-1.39708	9.5e-308	2.49e-303	0.089	0.916
ENSG00000132475	H3F3B	3	-1.41257	1.03e-307	2.7e-303	0.081	0.915
ENSG00000148834	GSTO1	3	-1.09646	1.08e-307	2.84e-303	0.047	0.871
ENSG00000125356	NDUFA1	3	-0.893795	1.57e-307	4.12e-303	0.041	0.869
ENSG00000173457	PPP1R14B	3	-1.21662	5.14e-307	1.35e-302	0.055	0.882
ENSG00000177410	ZFAS1	3	-1.68543	7.03e-307	1.84e-302	0.218	0.962
ENSG00000100632	ERH	3	-0.94489	1.6e-306	4.2e-302	0.05	0.877
ENSG00000089220	PEBP1	3	-1.35429	3.29e-306	8.63e-302	0.092	0.904
ENSG00000092841	MYL6	3	-1.37698	1.14e-305	2.99e-301	0.091	0.912
ENSG00000130770	ATP5IF1	3	-1.04222	2.11e-305	5.53e-301	0.047	0.873
ENSG00000075624	ACTB	3	-1.90089	2.17e-305	5.67e-301	0.262	0.944
ENSG00000115541	HSPE1	3	-1.21845	3.8e-305	9.96e-301	0.054	0.875
ENSG00000132341	RAN	3	-1.41062	3.99e-305	1.05e-300	0.081	0.897
ENSG00000101182	PSMA7	3	-1.29968	1.11e-304	2.91e-300	0.08	0.903
ENSG00000186010	NDUFA13	3	-1.22795	1.28e-304	3.34e-300	0.086	0.908
ENSG00000183648	NDUFB1	3	-0.865906	4.65e-304	1.22e-299	0.044	0.868
ENSG00000176731	RBIS	3	-0.9029	5.61e-304	1.47e-299	0.042	0.868
ENSG00000174021	GNG5	3	-0.943042	6.96e-304	1.82e-299	0.042	0.874
ENSG00000108518	PFN1	3	-1.63473	2.84e-303	7.45e-299	0.131	0.923
ENSG00000211450	SELENOH	3	-1.08894	3.77e-303	9.88e-299	0.064	0.891
ENSG00000154518	ATP5MC3	3	-1.2308	4.21e-303	1.1e-298	0.054	0.88
ENSG00000099977	DDT	3	-0.78359	4.91e-303	1.29e-298	0.014	0.821
ENSG00000106803	SEC61B	3	-1.07692	1.21e-302	3.18e-298	0.057	0.885
ENSG00000123349	PFDN5	3	-1.45138	3.19e-301	8.35e-297	0.121	0.926
ENSG00000163191	S100A11	3	-1.00798	5.31e-301	1.39e-296	0.024	0.831
ENSG00000111639	MRPL51	3	-0.931649	7.02e-301	1.84e-296	0.031	0.845
ENSG00000132432	SEC61G	3	-0.954563	9.39e-301	2.46e-296	0.042	0.861
ENSG00000088986	DYNLL1	3	-1.10046	1.04e-300	2.73e-296	0.046	0.861
ENSG00000117450	PRDX1	3	-1.80407	1.22e-300	3.2e-296	0.116	0.905
ENSG00000169442	CD52	3	-1.35781	1.79e-300	4.69e-296	0.047	0.854
ENSG00000245910	SNHG6	3	-1.57653	2.25e-300	5.88e-296	0.146	0.931
ENSG00000132963	POMP	3	-0.929495	2.38e-300	6.23e-296	0.049	0.873
ENSG00000172428	COPS9	3	-0.844365	5.59e-300	1.47e-295	0.032	0.847
ENSG00000101608	MYL12A	3	-0.780514	6.08e-300	1.59e-295	0.015	0.818
ENSG00000169020	ATP5ME	3	-1.0373	6.37e-300	1.67e-295	0.062	0.894
ENSG00000213719	CLIC1	3	-1.36392	6.49e-300	1.7e-295	0.102	0.913
ENSG00000092010	PSME1	3	-0.935072	6.69e-298	1.75e-293	0.055	0.885
ENSG00000154723	ATP5PF	3	-1.09066	6e-297	1.57e-292	0.064	0.888
ENSG00000179271	GADD45GIP1	3	-0.87047	6.27e-297	1.64e-292	0.04	0.853
ENSG00000075415	SLC25A3	3	-1.47176	3.27e-296	8.56e-292	0.125	0.928
ENSG00000111348	ARHGDIB	3	-1.28912	6.01e-296	1.58e-291	0.11	0.916
ENSG00000169976	SF3B5	3	-0.879122	7.52e-296	1.97e-291	0.036	0.846
ENSG00000170296	GABARAP	3	-0.772272	7.82e-296	2.05e-291	0.04	0.856
ENSG00000125743	SNRPD2	3	-1.09217	2.73e-295	7.15e-291	0.071	0.897
ENSG00000166136	NDUFB8	3	-0.897172	4.5e-295	1.18e-290	0.047	0.862
ENSG00000255302	EID1	3	-0.974554	6.26e-295	1.64e-290	0.06	0.877
ENSG00000185201	IFITM2	3	-0.893715	2.5e-294	6.54e-290	0.037	0.848
ENSG00000175390	EIF3F	3	-0.892073	3.79e-294	9.93e-290	0.061	0.884
ENSG00000168653	NDUFS5	3	-1.26238	6.26e-294	1.64e-289	0.089	0.905
ENSG00000130332	LSM7	3	-1.22799	1.31e-293	3.43e-289	0.089	0.904
ENSG00000156411	ATP5MPL	3	-1.11486	4.03e-293	1.05e-288	0.076	0.895
ENSG00000106588	PSMA2	3	-0.83007	4.51e-293	1.18e-288	0.042	0.853
ENSG00000219200	RNASEK	3	-0.826044	6.61e-293	1.73e-288	0.039	0.848
ENSG00000099795	NDUFB7	3	-0.867828	1.15e-292	3.02e-288	0.049	0.863
ENSG00000137309	HMGA1	3	-1.03624	2.03e-292	5.32e-288	0.064	0.88
ENSG00000114902	SPCS1	3	-0.837099	3.85e-292	1.01e-287	0.034	0.835
ENSG00000100300	TSPO	3	-0.792268	1.34e-291	3.51e-287	0.025	0.822
ENSG00000140990	NDUFB10	3	-0.860006	3.16e-291	8.28e-287	0.036	0.839
ENSG00000109390	NDUFC1	3	-0.729187	3.58e-291	9.38e-287	0.035	0.841
ENSG00000173436	MICOS10	3	-0.937732	3.96e-291	1.04e-286	0.046	0.856
ENSG00000164687	FABP5	3	-1.27492	4.32e-291	1.13e-286	0.061	0.864
ENSG00000115128	SF3B6	3	-0.762978	5.4e-291	1.41e-286	0.036	0.844
ENSG00000117592	PRDX6	3	-0.861558	6.8e-291	1.78e-286	0.051	0.866
ENSG00000231389	HLA-DPA1	3	-1.02152	8.33e-291	2.18e-286	0.032	0.832
ENSG00000065978	YBX1	3	-1.58946	1.39e-290	3.63e-286	0.279	0.957
ENSG00000182004	SNRPE	3	-1.20591	1.66e-290	4.35e-286	0.094	0.897
ENSG00000111716	LDHB	3	-1.48217	1.81e-290	4.74e-286	0.171	0.929
ENSG00000183011	NAA38	3	-0.837614	3.23e-290	8.47e-286	0.04	0.846
ENSG00000178127	NDUFV2	3	-0.890998	4.13e-290	1.08e-285	0.074	0.893
ENSG00000116288	PARK7	3	-1.07313	5.31e-290	1.39e-285	0.084	0.898
ENSG00000151366	NDUFC2	3	-0.813031	1.67e-289	4.37e-285	0.044	0.85
ENSG00000166913	YWHAB	3	-1.06157	1.79e-289	4.69e-285	0.075	0.889
ENSG00000178741	COX5A	3	-1.08409	6.82e-289	1.79e-284	0.084	0.898
ENSG00000125835	SNRPB	3	-1.1505	1.02e-288	2.67e-284	0.086	0.901
ENSG00000175550	DRAP1	3	-0.843802	1.61e-288	4.22e-284	0.047	0.854
ENSG00000118640	VAMP8	3	-1.05125	2.05e-288	5.38e-284	0.07	0.885
ENSG00000132507	EIF5A	3	-1.11421	2.42e-288	6.34e-284	0.077	0.886
ENSG00000174886	NDUFA11	3	-0.888829	2.8e-288	7.33e-284	0.056	0.867
ENSG00000196154	S100A4	3	-1.30748	3.07e-288	8.04e-284	0.034	0.825
ENSG00000164032	H2AFZ	3	-1.72797	4.86e-287	1.27e-282	0.125	0.899
ENSG00000174917	MICOS13	3	-0.700528	1.3e-286	3.4e-282	0.035	0.835
ENSG00000198931	APRT	3	-0.930079	2.26e-286	5.92e-282	0.055	0.867
ENSG00000158710	TAGLN2	3	-1.14857	2.52e-286	6.59e-282	0.086	0.901
ENSG00000111669	TPI1	3	-1.18095	3.83e-286	1e-281	0.082	0.89
ENSG00000135404	CD63	3	-1.21935	6.75e-286	1.77e-281	0.072	0.873
ENSG00000111786	SRSF9	3	-0.843582	2.63e-285	6.88e-281	0.057	0.871
ENSG00000173660	UQCRH	3	-1.3638	6.69e-285	1.75e-280	0.146	0.927
ENSG00000123416	TUBA1B	3	-1.82765	8.17e-285	2.14e-280	0.224	0.934
ENSG00000226950	DANCR	3	-0.832834	9.31e-285	2.44e-280	0.039	0.833
ENSG00000241837	ATP5PO	3	-0.799769	1.16e-284	3.03e-280	0.05	0.855
ENSG00000175768	TOMM5	3	-0.888417	1.65e-284	4.33e-280	0.05	0.848
ENSG00000229833	PET100	3	-0.617972	1.75e-284	4.59e-280	0.025	0.814
ENSG00000204264	PSMB8	3	-0.695562	3.96e-284	1.04e-279	0.031	0.82
ENSG00000129562	DAD1	3	-0.758212	5e-284	1.31e-279	0.022	0.807
ENSG00000134333	LDHA	3	-1.24127	5.3e-284	1.39e-279	0.099	0.895
ENSG00000145337	PYURF	3	-0.693316	6.05e-284	1.58e-279	0.017	0.798
ENSG00000042753	AP2S1	3	-0.734308	1.26e-283	3.29e-279	0.035	0.831
ENSG00000108561	C1QBP	3	-1.06577	1.43e-283	3.75e-279	0.074	0.877
ENSG00000147684	NDUFB9	3	-0.687451	2.6e-283	6.82e-279	0.034	0.826
ENSG00000087302	RTRAF	3	-0.77038	3.44e-283	9.01e-279	0.049	0.853
ENSG00000181163	NPM1	3	-1.54795	4.06e-283	1.06e-278	0.365	0.966
ENSG00000188186	LAMTOR4	3	-0.711377	4.47e-283	1.17e-278	0.042	0.836
ENSG00000167468	GPX4	3	-1.03769	8.74e-283	2.29e-278	0.081	0.892
ENSG00000197061	HIST1H4C	3	-2.59386	9.6e-283	2.51e-278	0.1	0.884
ENSG00000099800	TIMM13	3	-0.852034	1.18e-282	3.08e-278	0.044	0.838
ENSG00000166794	PPIB	3	-0.950411	1.98e-282	5.18e-278	0.059	0.862
ENSG00000186395	KRT10	3	-0.654903	4.83e-282	1.26e-277	0.024	0.809
ENSG00000145912	NHP2	3	-0.896233	2.13e-281	5.58e-277	0.055	0.852
ENSG00000100911	PSME2	3	-0.763716	3.71e-281	9.73e-277	0.041	0.834
ENSG00000198668	CALM1	3	-0.884988	4.31e-281	1.13e-276	0.05	0.854
ENSG00000150779	TIMM8B	3	-0.69574	4.57e-281	1.2e-276	0.029	0.814
ENSG00000100380	ST13	3	-0.754243	7.78e-281	2.04e-276	0.062	0.875
ENSG00000155115	GTF3C6	3	-0.72271	8.19e-281	2.15e-276	0.03	0.816
ENSG00000096384	HSP90AB1	3	-1.53604	9.55e-281	2.5e-276	0.377	0.962
ENSG00000143222	UFC1	3	-0.651413	9.75e-281	2.55e-276	0.027	0.812
ENSG00000152082	MZT2B	3	-1.22181	2.4e-280	6.29e-276	0.116	0.909
ENSG00000170860	LSM3	3	-0.705255	2.71e-280	7.1e-276	0.031	0.818
ENSG00000145494	NDUFS6	3	-0.979273	3.81e-280	9.97e-276	0.082	0.888
ENSG00000135486	HNRNPA1	3	-1.45434	1.33e-279	3.48e-275	0.241	0.948
ENSG00000214253	FIS1	3	-0.781211	2.41e-279	6.32e-275	0.051	0.849
ENSG00000150459	SAP18	3	-0.707342	3.61e-279	9.45e-275	0.049	0.849
ENSG00000099624	ATP5F1D	3	-0.996904	5.64e-279	1.48e-274	0.086	0.895
ENSG00000119705	SLIRP	3	-1.03988	6.25e-279	1.64e-274	0.085	0.892
ENSG00000182117	NOP10	3	-0.666771	9.38e-279	2.46e-274	0.019	0.795
ENSG00000173141	MRPL57	3	-0.777734	9.65e-279	2.53e-274	0.047	0.842
ENSG00000234745	HLA-B	3	-1.10212	1.31e-278	3.42e-274	0.082	0.89
ENSG00000125870	SNRPB2	3	-0.630299	2.99e-278	7.82e-274	0.032	0.817
ENSG00000135390	ATP5MC2	3	-1.38612	3.64e-278	9.52e-274	0.175	0.941
ENSG00000142507	PSMB6	3	-0.65505	3.92e-278	1.03e-273	0.022	0.797
ENSG00000111832	RWDD1	3	-0.687121	7.5e-278	1.96e-273	0.031	0.812
ENSG00000054148	PHPT1	3	-0.762777	1.24e-277	3.24e-273	0.029	0.805
ENSG00000106355	LSM5	3	-0.723528	1.66e-277	4.35e-273	0.036	0.824
ENSG00000174547	MRPL11	3	-0.644262	2.77e-277	7.25e-273	0.015	0.784
ENSG00000120742	SERP1	3	-0.612595	5.1e-277	1.34e-272	0.035	0.823
ENSG00000175334	BANF1	3	-0.689901	6.68e-277	1.75e-272	0.026	0.805
ENSG00000107223	EDF1	3	-0.840286	7.43e-277	1.95e-272	0.071	0.88
ENSG00000184990	SIVA1	3	-0.790458	7.93e-277	2.08e-272	0.036	0.816
ENSG00000196126	HLA-DRB1	3	-1.29449	8.66e-277	2.27e-272	0.08	0.874
ENSG00000129559	NEDD8	3	-0.875689	1.16e-276	3.03e-272	0.074	0.873
ENSG00000184752	NDUFA12	3	-0.681108	3.24e-276	8.5e-272	0.039	0.824
ENSG00000172115	CYCS	3	-0.771283	3.34e-276	8.75e-272	0.031	0.807
ENSG00000139343	SNRPF	3	-1.05493	4.73e-276	1.24e-271	0.094	0.898
ENSG00000113387	SUB1	3	-0.899561	7.05e-276	1.85e-271	0.09	0.896
ENSG00000105185	PDCD5	3	-0.832087	1.14e-275	2.98e-271	0.052	0.841
ENSG00000163584	RPL22L1	3	-0.960945	1.27e-275	3.32e-271	0.067	0.864
ENSG00000204392	LSM2	3	-0.670228	5.01e-275	1.31e-270	0.039	0.822
ENSG00000180879	SSR4	3	-1.00185	5.52e-274	1.45e-269	0.086	0.882
ENSG00000167085	PHB	3	-0.66569	9.24e-274	2.42e-269	0.029	0.802
ENSG00000099341	PSMD8	3	-0.754343	2.03e-273	5.33e-269	0.051	0.844
ENSG00000141552	ANAPC11	3	-0.652522	1.36e-272	3.56e-268	0.024	0.792
ENSG00000234741	GAS5	3	-1.23792	4.42e-272	1.16e-267	0.131	0.924
ENSG00000173113	TRMT112	3	-0.586573	5.9e-272	1.54e-267	0.011	0.77
ENSG00000155368	DBI	3	-0.669707	1.56e-271	4.08e-267	0.021	0.785
ENSG00000169021	UQCRFS1	3	-0.653838	1.59e-271	4.16e-267	0.037	0.818
ENSG00000163634	THOC7	3	-0.640453	1.74e-271	4.56e-267	0.04	0.818
ENSG00000110651	CD81	3	-0.749697	1.81e-271	4.74e-267	0.035	0.811
ENSG00000131495	NDUFA2	3	-0.594802	4.98e-271	1.31e-266	0.022	0.788
ENSG00000142168	SOD1	3	-0.662393	6.18e-271	1.62e-266	0.049	0.834
ENSG00000026025	VIM	3	-1.70375	9.4e-271	2.46e-266	0.237	0.944
ENSG00000149357	LAMTOR1	3	-0.599585	9.48e-271	2.48e-266	0.025	0.793
ENSG00000167863	ATP5PD	3	-0.630257	2.67e-270	7e-266	0.04	0.82
ENSG00000178982	EIF3K	3	-1.08087	3.82e-270	1e-265	0.118	0.917
ENSG00000162704	ARPC5	3	-0.70057	1.04e-269	2.72e-265	0.05	0.835
ENSG00000224877	NDUFAF8	3	-0.72973	2.91e-269	7.62e-265	0.039	0.814
ENSG00000239672	NME1	3	-0.930719	3.17e-269	8.31e-265	0.065	0.852
ENSG00000205581	HMGN1	3	-1.09965	1.15e-268	3.02e-264	0.123	0.915
ENSG00000163479	SSR2	3	-0.723313	1.67e-268	4.37e-264	0.062	0.852
ENSG00000146701	MDH2	3	-0.685975	2.28e-268	5.97e-264	0.042	0.817
ENSG00000163463	KRTCAP2	3	-0.724117	2.96e-268	7.77e-264	0.064	0.852
ENSG00000114125	RNF7	3	-0.57564	8.36e-268	2.19e-263	0.02	0.777
ENSG00000129235	TXNDC17	3	-0.683146	1.08e-267	2.84e-263	0.037	0.808
ENSG00000182512	GLRX5	3	-0.622229	1.38e-267	3.62e-263	0.026	0.789
ENSG00000185088	RPS27L	3	-0.720791	1.46e-267	3.83e-263	0.044	0.823
ENSG00000119335	SET	3	-1.22898	1.8e-267	4.7e-263	0.182	0.928
ENSG00000087191	PSMC5	3	-0.613416	1.87e-267	4.91e-263	0.04	0.814
ENSG00000134248	LAMTOR5	3	-0.614691	2.18e-267	5.72e-263	0.034	0.804
ENSG00000120533	ENY2	3	-0.633158	3.2e-267	8.39e-263	0.051	0.835
ENSG00000188612	SUMO2	3	-1.0715	5.09e-267	1.33e-262	0.121	0.915
ENSG00000111843	TMEM14C	3	-0.562254	6.19e-267	1.62e-262	0.015	0.769
ENSG00000225921	NOL7	3	-0.766839	4.64e-266	1.21e-261	0.067	0.859
ENSG00000104979	C19orf53	3	-0.570322	8.89e-266	2.33e-261	0.019	0.775
ENSG00000136888	ATP6V1G1	3	-0.569859	9.42e-266	2.47e-261	0.039	0.812
ENSG00000114353	GNAI2	3	-0.749285	1.24e-265	3.26e-261	0.071	0.863
ENSG00000183172	SMDT1	3	-0.544749	1.94e-265	5.08e-261	0.014	0.763
ENSG00000126432	PRDX5	3	-0.582662	2.65e-265	6.93e-261	0.019	0.773
ENSG00000004779	NDUFAB1	3	-0.735418	3.86e-265	1.01e-260	0.055	0.836
ENSG00000265241	RBM8A	3	-0.715933	4.87e-265	1.27e-260	0.071	0.862
ENSG00000205981	DNAJC19	3	-0.559132	5.33e-265	1.4e-260	0.012	0.762
ENSG00000196230	TUBB	3	-1.23464	8.12e-265	2.13e-260	0.141	0.905
ENSG00000106268	NUDT1	3	-0.648	9.32e-265	2.44e-260	0.026	0.783
ENSG00000161203	AP2M1	3	-0.589082	9.5e-265	2.49e-260	0.032	0.8
ENSG00000100216	TOMM22	3	-0.588215	1.15e-264	3e-260	0.017	0.768
ENSG00000167553	TUBA1C	3	-0.74	1.26e-264	3.29e-260	0.052	0.827
ENSG00000118418	HMGN3	3	-0.611923	1.44e-264	3.78e-260	0.049	0.828
ENSG00000105258	POLR2I	3	-0.603321	1.59e-264	4.18e-260	0.025	0.784
ENSG00000062582	MRPS24	3	-0.578618	2.45e-264	6.42e-260	0.015	0.764
ENSG00000143543	JTB	3	-0.681748	3.31e-264	8.67e-260	0.052	0.829
ENSG00000184983	NDUFA6	3	-0.612837	4.14e-264	1.09e-259	0.027	0.787
ENSG00000140307	GTF2A2	3	-0.566326	1.34e-263	3.51e-259	0.034	0.798
ENSG00000258289	CHURC1	3	-0.592934	2.06e-263	5.39e-259	0.059	0.844
ENSG00000139168	ZCRB1	3	-0.622551	6.08e-263	1.59e-258	0.05	0.829
ENSG00000143774	GUK1	3	-0.619265	7.15e-263	1.87e-258	0.047	0.822
ENSG00000099901	RANBP1	3	-0.981463	1.81e-262	4.73e-258	0.07	0.849
ENSG00000167088	SNRPD1	3	-1.05376	2.89e-262	7.57e-258	0.123	0.905
ENSG00000182154	MRPL41	3	-0.63058	2.99e-262	7.83e-258	0.011	0.754
ENSG00000204525	HLA-C	3	-0.71753	3.5e-262	9.17e-258	0.059	0.837
ENSG00000005075	POLR2J	3	-0.575651	4.71e-262	1.24e-257	0.021	0.77
ENSG00000082153	BZW1	3	-0.704407	4.76e-262	1.25e-257	0.067	0.853
ENSG00000142227	EMP3	3	-0.864663	5.08e-262	1.33e-257	0.072	0.856
ENSG00000075142	SRI	3	-0.565972	6.3e-262	1.65e-257	0.031	0.789
ENSG00000106211	HSPB1	3	-0.733435	6.76e-262	1.77e-257	0.044	0.812
ENSG00000163319	MRPS18C	3	-0.60117	1.6e-261	4.18e-257	0.029	0.785
ENSG00000187051	RPS19BP1	3	-0.58338	1.75e-261	4.59e-257	0.019	0.767
ENSG00000172590	MRPL52	3	-0.700951	4.41e-261	1.16e-256	0.054	0.833
ENSG00000130522	JUND	3	-0.635146	4.76e-261	1.25e-256	0.039	0.805
ENSG00000137876	RSL24D1	3	-0.720403	5.42e-261	1.42e-256	0.079	0.871
ENSG00000198856	OSTC	3	-0.633186	6.32e-261	1.66e-256	0.057	0.833
ENSG00000213465	ARL2	3	-0.602659	6.34e-261	1.66e-256	0.045	0.814
ENSG00000150991	UBC	3	-0.803033	8.68e-261	2.27e-256	0.071	0.852
ENSG00000124562	SNRPC	3	-0.581594	1.35e-260	3.54e-256	0.035	0.793
ENSG00000203667	COX20	3	-0.558352	1.93e-260	5.06e-256	0.031	0.785
ENSG00000111328	CDK2AP1	3	-0.583634	4.03e-260	1.06e-255	0.03	0.784
ENSG00000106400	ZNHIT1	3	-0.557653	5.23e-260	1.37e-255	0.046	0.82
ENSG00000224032	EPB41L4A-AS1	3	-0.571684	6.69e-260	1.75e-255	0.04	0.802
ENSG00000165629	ATP5F1C	3	-0.727168	6.72e-260	1.76e-255	0.077	0.863
ENSG00000115944	COX7A2L	3	-0.574251	1.53e-259	4e-255	0.054	0.825
ENSG00000135446	CDK4	3	-0.653777	3.37e-259	8.82e-255	0.03	0.782
ENSG00000106028	SSBP1	3	-0.958556	3.7e-259	9.68e-255	0.123	0.915
ENSG00000134809	TIMM10	3	-0.622333	1.13e-258	2.95e-254	0.016	0.756
ENSG00000232712	KIZ-AS1	3	-0.522001	1.18e-258	3.1e-254	0.022	0.769
ENSG00000105583	WDR83OS	3	-0.538743	1.31e-258	3.44e-254	0.027	0.78
ENSG00000123131	PRDX4	3	-0.645992	1.4e-258	3.68e-254	0.027	0.774
ENSG00000112514	CUTA	3	-0.604772	2.7e-258	7.06e-254	0.027	0.779
ENSG00000129824	RPS4Y1	3	-1.08859	3.33e-258	8.74e-254	0.145	0.928
ENSG00000115758	ODC1	3	-0.731956	3.36e-258	8.8e-254	0.042	0.799
ENSG00000105887	MTPN	3	-0.60654	4.36e-258	1.14e-253	0.055	0.828
ENSG00000143198	MGST3	3	-0.568971	6.17e-258	1.62e-253	0.031	0.787
ENSG00000204592	HLA-E	3	-0.63905	7.17e-258	1.88e-253	0.059	0.829
ENSG00000130725	UBE2M	3	-0.562634	1.06e-257	2.78e-253	0.022	0.768
ENSG00000126457	PRMT1	3	-0.735058	3.47e-257	9.08e-253	0.061	0.829
ENSG00000113558	SKP1	3	-0.730892	4.51e-257	1.18e-252	0.09	0.888
ENSG00000074800	ENO1	3	-1.39762	7.85e-257	2.05e-252	0.319	0.954
ENSG00000180817	PPA1	3	-0.687274	8.07e-257	2.11e-252	0.062	0.837
ENSG00000175756	AURKAIP1	3	-0.562676	9.46e-257	2.48e-252	0.045	0.809
ENSG00000165283	STOML2	3	-0.587803	1.23e-256	3.23e-252	0.037	0.794
ENSG00000126698	DNAJC8	3	-0.702087	1.35e-256	3.54e-252	0.086	0.874
ENSG00000175602	CCDC85B	3	-0.677611	1.37e-256	3.58e-252	0.044	0.804
ENSG00000105379	ETFB	3	-0.562469	2.59e-256	6.79e-252	0.049	0.816
ENSG00000130520	LSM4	3	-0.619017	3.95e-256	1.03e-251	0.031	0.781
ENSG00000196976	LAGE3	3	-0.590401	4.71e-256	1.23e-251	0.017	0.757
ENSG00000143727	ACP1	3	-0.488487	7.01e-256	1.84e-251	0.032	0.784
ENSG00000125868	DSTN	3	-0.556114	7.37e-256	1.93e-251	0.027	0.776
ENSG00000215021	PHB2	3	-0.654784	2.32e-255	6.08e-251	0.052	0.818
ENSG00000100567	PSMA3	3	-0.572293	9.44e-255	2.47e-250	0.062	0.84
ENSG00000181029	TRAPPC5	3	-0.595532	2.95e-254	7.73e-250	0.035	0.784
ENSG00000100028	SNRPD3	3	-0.543799	3.42e-254	8.96e-250	0.04	0.793
ENSG00000103202	NME4	3	-0.729185	4.3e-254	1.13e-249	0.055	0.817
ENSG00000021355	SERPINB1	3	-1.23706	4.38e-254	1.15e-249	0.148	0.907
ENSG00000169564	PCBP1	3	-0.548021	5.52e-254	1.45e-249	0.031	0.781
ENSG00000213585	VDAC1	3	-0.838814	6.08e-254	1.59e-249	0.091	0.875
ENSG00000188229	TUBB4B	3	-0.835067	1.21e-253	3.17e-249	0.064	0.826
ENSG00000164346	NSA2	3	-0.738991	2.25e-253	5.89e-249	0.102	0.895
ENSG00000173726	TOMM20	3	-0.776271	2.84e-253	7.45e-249	0.089	0.867
ENSG00000139684	ESD	3	-0.565285	4.7e-253	1.23e-248	0.05	0.808
ENSG00000089327	FXYD5	3	-0.754233	5.12e-253	1.34e-248	0.092	0.878
ENSG00000150316	CWC15	3	-0.509778	1.19e-252	3.12e-248	0.037	0.788
ENSG00000178449	COX14	3	-0.520959	2.02e-252	5.3e-248	0.009	0.733
ENSG00000197345	MRPL21	3	-0.560144	3.34e-252	8.75e-248	0.035	0.783
ENSG00000102144	PGK1	3	-0.691922	3.37e-252	8.82e-248	0.085	0.869
ENSG00000161547	SRSF2	3	-0.813657	5.22e-252	1.37e-247	0.086	0.861
ENSG00000143256	PFDN2	3	-0.619944	6.15e-252	1.61e-247	0.057	0.822
ENSG00000131236	CAP1	3	-0.51241	7.12e-252	1.87e-247	0.036	0.786
ENSG00000230989	HSBP1	3	-0.512958	2.08e-251	5.44e-247	0.029	0.769
ENSG00000136156	ITM2B	3	-0.575729	2.9e-251	7.6e-247	0.051	0.811
ENSG00000110955	ATP5F1B	3	-0.786932	4.1e-251	1.07e-246	0.094	0.871
ENSG00000160932	LY6E	3	-0.592921	5.22e-251	1.37e-246	0.032	0.774
ENSG00000277791	PSMB3	3	-0.651556	5.57e-251	1.46e-246	0.08	0.858
ENSG00000254999	BRK1	3	-0.575489	7.76e-251	2.03e-246	0.055	0.819
ENSG00000171314	PGAM1	3	-0.559404	1.12e-250	2.92e-246	0.031	0.772
ENSG00000162385	MAGOH	3	-0.501684	1.96e-250	5.13e-246	0.04	0.788
ENSG00000118363	SPCS2	3	-0.606397	2.45e-250	6.42e-246	0.062	0.83
ENSG00000186184	POLR1D	3	-0.536636	3.44e-250	9e-246	0.056	0.819
ENSG00000138495	COX17	3	-0.530786	4.73e-250	1.24e-245	0.014	0.739
ENSG00000117691	NENF	3	-0.49009	6.51e-250	1.7e-245	0.027	0.765
ENSG00000119013	NDUFB3	3	-0.509512	1.65e-249	4.32e-245	0.022	0.753
ENSG00000102007	PLP2	3	-0.635969	2.1e-249	5.51e-245	0.027	0.761
ENSG00000105889	STEAP1B	3	-0.464514	1.78e-248	4.66e-244	0.027	0.763
ENSG00000105404	RABAC1	3	-0.523551	6.54e-248	1.71e-243	0.039	0.783
ENSG00000213145	CRIP1	3	-0.920161	8.11e-248	2.12e-243	0.034	0.767
ENSG00000166681	BEX3	3	-0.519312	1.15e-247	3.02e-243	0.026	0.76
ENSG00000232388	SMIM26	3	-0.471428	1.67e-247	4.38e-243	0.015	0.738
ENSG00000006625	GGCT	3	-0.65621	2.62e-247	6.87e-243	0.062	0.82
ENSG00000128040	SPINK2	3	-0.825115	2.88e-247	7.54e-243	0.032	0.762
ENSG00000166689	PLEKHA7	3	-0.468377	3.73e-247	9.77e-243	0.037	0.781
ENSG00000146066	HIGD2A	3	-0.506785	4.34e-247	1.14e-242	0.02	0.745
ENSG00000126247	CAPNS1	3	-0.477406	1.04e-246	2.72e-242	0.026	0.757
ENSG00000160213	CSTB	3	-0.562503	1.97e-246	5.17e-242	0.017	0.74
ENSG00000106399	RPA3	3	-0.567117	2.14e-246	5.61e-242	0.02	0.745
ENSG00000198830	HMGN2	3	-1.45142	2.95e-246	7.74e-242	0.228	0.936
ENSG00000122034	GTF3A	3	-0.603247	5.12e-246	1.34e-241	0.066	0.828
ENSG00000182196	ARL6IP4	3	-0.804564	5.26e-246	1.38e-241	0.116	0.894
ENSG00000165678	GHITM	3	-0.485333	1.08e-245	2.84e-241	0.039	0.779
ENSG00000136238	RAC1	3	-0.672269	1.56e-245	4.09e-241	0.092	0.872
ENSG00000137288	UQCC2	3	-0.510703	2.07e-245	5.44e-241	0.034	0.768
ENSG00000205352	PRR13	3	-0.514806	2.13e-245	5.57e-241	0.03	0.761
ENSG00000143621	ILF2	3	-0.635963	3.49e-245	9.13e-241	0.072	0.834
ENSG00000123144	TRIR	3	-0.626648	1.83e-244	4.8e-240	0.082	0.857
ENSG00000215845	TSTD1	3	-0.488927	2.75e-244	7.21e-240	0.01	0.722
ENSG00000165637	VDAC2	3	-0.54085	4.48e-244	1.17e-239	0.061	0.82
ENSG00000133134	BEX2	3	-0.522308	1.19e-243	3.11e-239	0.017	0.736
ENSG00000100097	LGALS1	3	-1.05843	1.26e-243	3.3e-239	0.034	0.757
ENSG00000177733	HNRNPA0	3	-0.491951	1.71e-243	4.48e-239	0.019	0.736
ENSG00000242485	MRPL20	3	-0.628748	1.73e-243	4.54e-239	0.09	0.861
ENSG00000243449	C4orf48	3	-0.529433	1.78e-243	4.67e-239	0.03	0.758
ENSG00000112081	SRSF3	3	-0.980377	1.86e-243	4.87e-239	0.146	0.912
ENSG00000088832	FKBP1A	3	-0.524787	4.87e-243	1.28e-238	0.065	0.822
ENSG00000135441	BLOC1S1	3	-0.447196	5.5e-243	1.44e-238	0.022	0.744
ENSG00000128626	MRPS12	3	-0.513844	1.07e-242	2.81e-238	0.017	0.733
ENSG00000164096	C4orf3	3	-0.482053	1.11e-242	2.9e-238	0.011	0.72
ENSG00000130755	GMFG	3	-0.815476	1.42e-242	3.73e-238	0.122	0.899
ENSG00000116161	CACYBP	3	-0.500501	1.92e-242	5.02e-238	0.037	0.771
ENSG00000204435	CSNK2B	3	-0.523575	1.95e-242	5.11e-238	0.03	0.757
ENSG00000178035	IMPDH2	3	-0.640247	2.14e-242	5.62e-238	0.082	0.847
ENSG00000041357	PSMA4	3	-0.630667	2.33e-242	6.11e-238	0.074	0.838
ENSG00000159335	PTMS	3	-0.577231	3.94e-242	1.03e-237	0.036	0.766
ENSG00000197451	HNRNPAB	3	-0.964654	6.21e-242	1.63e-237	0.123	0.881
ENSG00000146386	ABRACL	3	-0.572453	9.54e-242	2.5e-237	0.055	0.8
ENSG00000051620	HEBP2	3	-0.471458	2.25e-241	5.89e-237	0.041	0.779
ENSG00000019582	CD74	3	-1.31463	2.51e-241	6.58e-237	0.182	0.91
ENSG00000135624	CCT7	3	-0.499907	3.95e-241	1.04e-236	0.05	0.791
ENSG00000178980	SELENOW	3	-0.492028	4.06e-241	1.06e-236	0.03	0.755
ENSG00000173674	EIF1AX	3	-0.671546	9.82e-241	2.57e-236	0.085	0.853
ENSG00000170906	NDUFA3	3	-0.461975	9.9e-241	2.59e-236	0.021	0.738
ENSG00000116586	LAMTOR2	3	-0.515091	1e-240	2.62e-236	0.02	0.734
ENSG00000117410	ATP6V0B	3	-0.556982	3.06e-240	8.01e-236	0.054	0.796
ENSG00000035141	FAM136A	3	-0.550817	3.64e-240	9.54e-236	0.036	0.765
ENSG00000217555	CKLF	3	-0.629867	8.38e-240	2.19e-235	0.07	0.821
ENSG00000171222	SCAND1	3	-0.503677	8.39e-240	2.2e-235	0.03	0.753
ENSG00000112335	SNX3	3	-0.441895	9.23e-240	2.42e-235	0.049	0.79
ENSG00000130811	EIF3G	3	-0.416249	1.13e-239	2.95e-235	0.065	0.819
ENSG00000133983	COX16	3	-0.450426	1.53e-239	4e-235	0.042	0.779
ENSG00000181924	COA4	3	-0.494173	2.48e-239	6.48e-235	0.019	0.732
ENSG00000070831	CDC42	3	-0.466054	3.95e-239	1.04e-234	0.086	0.857
ENSG00000267855	NDUFA7	3	-0.495448	4.05e-239	1.06e-234	0.025	0.744
ENSG00000105373	NOP53	3	-0.763283	2.98e-238	7.81e-234	0.126	0.907
ENSG00000110717	NDUFS8	3	-0.555059	3.01e-238	7.88e-234	0.066	0.819
ENSG00000120963	ZNF706	3	-0.433161	5.01e-238	1.31e-233	0.051	0.791
ENSG00000143742	SRP9	3	-0.548978	2.01e-237	5.26e-233	0.089	0.856
ENSG00000105202	FBL	3	-0.629186	4.23e-237	1.11e-232	0.092	0.86
ENSG00000170043	TRAPPC1	3	-0.420641	4.32e-237	1.13e-232	0.017	0.724
ENSG00000152234	ATP5F1A	3	-0.639821	5.38e-237	1.41e-232	0.102	0.869
ENSG00000106245	BUD31	3	-0.499045	5.89e-237	1.54e-232	0.017	0.722
ENSG00000138385	SSB	3	-0.653164	6.15e-237	1.61e-232	0.092	0.854
ENSG00000105677	TMEM147	3	-0.506219	1.26e-236	3.31e-232	0.015	0.718
ENSG00000144034	TPRKB	3	-0.448967	2.42e-236	6.33e-232	0.019	0.727
ENSG00000143549	TPM3	3	-1.09373	2.79e-236	7.3e-232	0.204	0.938
ENSG00000165916	PSMC3	3	-0.450052	4.15e-236	1.09e-231	0.052	0.789
ENSG00000128534	LSM8	3	-0.442688	4.6e-236	1.21e-231	0.051	0.789
ENSG00000114956	DGUOK	3	-0.48424	4.95e-236	1.3e-231	0.049	0.782
ENSG00000229267	SNHG31	3	-0.454628	7.95e-236	2.08e-231	0.014	0.715
ENSG00000130748	TMEM160	3	-0.534593	9.36e-236	2.45e-231	0.065	0.811
ENSG00000091527	CDV3	3	-0.503118	1.5e-235	3.93e-231	0.069	0.82
ENSG00000130724	CHMP2A	3	-0.428055	5.79e-235	1.52e-230	0.021	0.727
ENSG00000156261	CCT8	3	-0.551173	6.04e-235	1.58e-230	0.079	0.833
ENSG00000198168	SVIP	3	-0.466566	9.02e-235	2.36e-230	0.064	0.812
ENSG00000198692	EIF1AY	3	-0.468127	1.36e-234	3.55e-230	0.024	0.733
ENSG00000071994	PDCD2	3	-0.449642	6.62e-234	1.73e-229	0.017	0.719
ENSG00000109971	HSPA8	3	-1.11547	8.5e-234	2.23e-229	0.153	0.89
ENSG00000243147	MRPL33	3	-0.451904	8.59e-234	2.25e-229	0.017	0.719
ENSG00000172922	RNASEH2C	3	-0.459736	8.63e-234	2.26e-229	0.02	0.723
ENSG00000184007	PTP4A2	3	-0.510892	1.32e-233	3.45e-229	0.07	0.819
ENSG00000172500	FIBP	3	-0.457183	2.42e-233	6.33e-229	0.027	0.739
ENSG00000086061	DNAJA1	3	-0.553511	5.29e-233	1.39e-228	0.086	0.846
ENSG00000112667	DNPH1	3	-0.501404	5.38e-233	1.41e-228	0.017	0.717
ENSG00000154582	ELOC	3	-0.443718	5.44e-233	1.42e-228	0.045	0.767
ENSG00000179958	DCTPP1	3	-0.542836	1.09e-232	2.85e-228	0.045	0.769
ENSG00000143933	CALM2	3	-0.897778	1.68e-232	4.4e-228	0.161	0.922
ENSG00000130313	PGLS	3	-0.457365	2.91e-232	7.62e-228	0.052	0.785
ENSG00000197747	S100A10	3	-0.666021	1.04e-231	2.73e-227	0.025	0.726
ENSG00000150753	CCT5	3	-0.575301	1.27e-231	3.31e-227	0.09	0.846
ENSG00000172586	CHCHD1	3	-0.436757	1.75e-231	4.59e-227	0.012	0.705
ENSG00000243317	STMP1	3	-0.403073	5.12e-231	1.34e-226	0.044	0.767
ENSG00000165264	NDUFB6	3	-0.454639	8.94e-231	2.34e-226	0.041	0.758
ENSG00000140905	GCSH	3	-0.524543	1.02e-230	2.68e-226	0.037	0.75
ENSG00000184900	SUMO3	3	-0.444983	2.03e-230	5.31e-226	0.03	0.735
ENSG00000164615	CAMLG	3	-0.464333	2.06e-230	5.4e-226	0.054	0.783
ENSG00000144746	ARL6IP5	3	-0.436815	2.32e-230	6.07e-226	0.041	0.759
ENSG00000100387	RBX1	3	-0.639892	9.14e-230	2.39e-225	0.12	0.893
ENSG00000143761	ARF1	3	-0.448887	1.27e-229	3.32e-225	0.067	0.807
ENSG00000149600	COMMD7	3	-0.46217	1.89e-229	4.94e-225	0.061	0.795
ENSG00000082515	MRPL22	3	-0.408463	2.48e-229	6.49e-225	0.021	0.717
ENSG00000143158	MPC2	3	-0.419649	3.66e-229	9.58e-225	0.031	0.738
ENSG00000100823	APEX1	3	-0.573833	4.88e-229	1.28e-224	0.097	0.851
ENSG00000143545	RAB13	3	-0.491303	5.65e-229	1.48e-224	0.026	0.727
ENSG00000129084	PSMA1	3	-0.519169	5.86e-229	1.54e-224	0.096	0.855
ENSG00000084623	EIF3I	3	-0.431855	1.12e-228	2.93e-224	0.057	0.787
ENSG00000116649	SRM	3	-0.665563	2.42e-228	6.35e-224	0.094	0.839
ENSG00000167658	EEF2	3	-1.03042	2.88e-228	7.55e-224	0.2	0.93
ENSG00000101084	RAB5IF	3	-0.455466	3.72e-228	9.73e-224	0.02	0.713
ENSG00000127884	ECHS1	3	-0.415612	4.08e-228	1.07e-223	0.021	0.717
ENSG00000118816	CCNI	3	-0.816346	1.13e-227	2.97e-223	0.146	0.909
ENSG00000116898	MRPS15	3	-0.462937	1.63e-227	4.26e-223	0.035	0.743
ENSG00000136819	C9orf78	3	-0.452626	1.83e-227	4.79e-223	0.065	0.798
ENSG00000023734	STRAP	3	-0.441889	2.06e-227	5.39e-223	0.052	0.776
ENSG00000119185	ITGB1BP1	3	-0.420886	2.6e-227	6.81e-223	0.039	0.748
ENSG00000166295	ANAPC16	3	-0.429966	2.64e-227	6.9e-223	0.051	0.773
ENSG00000137100	DCTN3	3	-0.463467	3.08e-227	8.08e-223	0.01	0.693
ENSG00000185883	ATP6V0C	3	-0.439001	3.36e-227	8.8e-223	0.027	0.727
ENSG00000127445	PIN1	3	-0.461904	3.69e-227	9.65e-223	0.032	0.735
ENSG00000122862	SRGN	3	-0.594897	4.12e-227	1.08e-222	0.059	0.784
ENSG00000109113	RAB34	3	-0.453953	7.52e-227	1.97e-222	0.034	0.738
ENSG00000179344	HLA-DQB1	3	-0.518123	9.5e-227	2.49e-222	0.03	0.73
ENSG00000206503	HLA-A	3	-0.697604	1.59e-226	4.18e-222	0.115	0.875
ENSG00000167815	PRDX2	3	-0.512799	2.29e-226	6e-222	0.01	0.691
ENSG00000155438	NIFK	3	-0.42975	3.62e-226	9.47e-222	0.037	0.744
ENSG00000128228	SDF2L1	3	-0.474253	3.82e-226	1e-221	0.01	0.691
ENSG00000114686	MRPL3	3	-0.44225	5.19e-226	1.36e-221	0.069	0.8
ENSG00000133142	TCEAL4	3	-0.426892	7.62e-226	2e-221	0.054	0.775
ENSG00000131116	ZNF428	3	-0.397199	1.78e-225	4.67e-221	0.024	0.716
ENSG00000149100	EIF3M	3	-0.584751	2.6e-225	6.81e-221	0.107	0.868
ENSG00000166226	CCT2	3	-0.710306	3.73e-225	9.78e-221	0.116	0.868
ENSG00000125971	DYNLRB1	3	-0.439084	3.9e-225	1.02e-220	0.014	0.695
ENSG00000074071	MRPS34	3	-0.511101	6.35e-225	1.66e-220	0.051	0.764
ENSG00000103495	MAZ	3	-0.516457	8.28e-225	2.17e-220	0.055	0.774
ENSG00000078668	VDAC3	3	-0.439158	1.11e-224	2.91e-220	0.067	0.798
ENSG00000104964	TLE5	3	-0.403409	1.83e-224	4.78e-220	0.051	0.769
ENSG00000163466	ARPC2	3	-1.03521	5.98e-224	1.57e-219	0.221	0.946
ENSG00000130429	ARPC1B	3	-0.730938	8.57e-224	2.24e-219	0.13	0.89
ENSG00000182718	ANXA2	3	-0.444108	9.3e-224	2.43e-219	0.042	0.749
ENSG00000177556	ATOX1	3	-0.409207	1.28e-223	3.34e-219	0.052	0.766
ENSG00000100442	FKBP3	3	-0.414383	1.66e-223	4.36e-219	0.057	0.779
ENSG00000139644	TMBIM6	3	-0.429839	2.59e-223	6.79e-219	0.07	0.803
ENSG00000244687	UBE2V1	3	-0.435909	2.63e-223	6.9e-219	0.085	0.832
ENSG00000172531	PPP1CA	3	-0.43534	3.64e-223	9.54e-219	0.045	0.754
ENSG00000171476	HOPX	3	-0.585717	4.55e-223	1.19e-218	0.014	0.692
ENSG00000127774	EMC6	3	-0.436235	5.33e-223	1.4e-218	0.011	0.686
ENSG00000162511	LAPTM5	3	-0.60237	6.63e-223	1.74e-218	0.113	0.873
ENSG00000166595	CIAO2B	3	-0.396323	7.05e-223	1.85e-218	0.012	0.691
ENSG00000138382	METTL5	3	-0.376884	7.48e-223	1.96e-218	0.049	0.76
ENSG00000178952	TUFM	3	-0.530679	1.43e-222	3.76e-218	0.089	0.831
ENSG00000223865	HLA-DPB1	3	-0.68349	1.59e-222	4.18e-218	0.111	0.856
ENSG00000147677	EIF3H	3	-0.601858	2.43e-222	6.37e-218	0.128	0.904
ENSG00000100902	PSMA6	3	-0.57072	2.7e-222	7.08e-218	0.111	0.872
ENSG00000126067	PSMB2	3	-0.430575	3.15e-222	8.25e-218	0.05	0.76
ENSG00000022277	RTF2	3	-0.42839	4.51e-222	1.18e-217	0.065	0.79
ENSG00000136522	MRPL47	3	-0.381659	1.1e-221	2.88e-217	0.04	0.742
ENSG00000116459	ATP5PB	3	-0.403766	1.42e-221	3.72e-217	0.047	0.755
ENSG00000102879	CORO1A	3	-0.481557	2.86e-221	7.49e-217	0.081	0.815
ENSG00000143870	PDIA6	3	-0.423191	4.42e-221	1.16e-216	0.069	0.796
ENSG00000240065	PSMB9	3	-0.43011	6.39e-221	1.67e-216	0.017	0.696
ENSG00000133872	SARAF	3	-0.402049	7.07e-221	1.85e-216	0.079	0.815
ENSG00000233016	SNHG7	3	-0.537738	9.06e-221	2.37e-216	0.075	0.803
ENSG00000185043	CIB1	3	-0.394629	1.14e-220	2.98e-216	0.024	0.709
ENSG00000172172	MRPL13	3	-0.393796	1.16e-220	3.05e-216	0.029	0.717
ENSG00000076662	ICAM3	3	-0.460405	1.18e-220	3.09e-216	0.056	0.768
ENSG00000169689	CENPX	3	-0.437646	1.42e-220	3.71e-216	0.03	0.719
ENSG00000143799	PARP1	3	-0.649666	3.22e-220	8.44e-216	0.106	0.843
ENSG00000187840	EIF4EBP1	3	-0.596802	3.51e-220	9.18e-216	0.082	0.811
ENSG00000145247	OCIAD2	3	-0.409935	4.04e-220	1.06e-215	0.034	0.725
ENSG00000165672	PRDX3	3	-0.409993	4.31e-220	1.13e-215	0.037	0.735
ENSG00000179091	CYC1	3	-0.428736	5.77e-220	1.51e-215	0.051	0.76
ENSG00000173272	MZT2A	3	-0.603221	1.11e-219	2.9e-215	0.107	0.856
ENSG00000089248	ERP29	3	-0.404078	1.26e-219	3.3e-215	0.059	0.774
ENSG00000101200	AVP	3	-1.41908	1.68e-219	4.39e-215	0.072	0.761
ENSG00000100138	SNU13	3	-0.702157	1.84e-219	4.83e-215	0.132	0.891
ENSG00000166562	SEC11C	3	-0.418329	2.09e-219	5.48e-215	0.031	0.72
ENSG00000189403	HMGB1	3	-1.38511	3.14e-219	8.23e-215	0.434	0.97
ENSG00000170584	NUDCD2	3	-0.396078	4.87e-219	1.28e-214	0.03	0.716
ENSG00000171530	TBCA	3	-0.563266	1.72e-218	4.51e-214	0.123	0.887
ENSG00000100804	PSMB5	3	-0.406152	2.69e-218	7.04e-214	0.051	0.756
ENSG00000042493	CAPG	3	-0.424166	3.12e-218	8.16e-214	0.027	0.71
ENSG00000165669	FAM204A	3	-0.350569	3.2e-218	8.39e-214	0.074	0.8
ENSG00000114023	FAM162A	3	-0.37239	3.94e-218	1.03e-213	0.036	0.728
ENSG00000164167	LSM6	3	-0.39823	4.63e-218	1.21e-213	0.02	0.696
ENSG00000137547	MRPL15	3	-0.405717	4.98e-218	1.3e-213	0.024	0.703
ENSG00000104894	CD37	3	-0.407713	5.61e-218	1.47e-213	0.062	0.776
ENSG00000089693	MLF2	3	-0.385108	6.25e-218	1.64e-213	0.022	0.701
ENSG00000130303	BST2	3	-0.467937	6.41e-218	1.68e-213	0.034	0.719
ENSG00000170515	PA2G4	3	-0.885914	7e-218	1.83e-213	0.171	0.91
ENSG00000183726	TMEM50A	3	-0.408268	7.79e-218	2.04e-213	0.035	0.724
ENSG00000117395	EBNA1BP2	3	-0.417613	9.27e-218	2.43e-213	0.05	0.753
ENSG00000250479	CHCHD10	3	-0.468844	4.42e-217	1.16e-212	0.052	0.755
ENSG00000165512	ZNF22	3	-0.430097	5.37e-217	1.41e-212	0.035	0.721
ENSG00000185787	MORF4L1	3	-0.597404	5.76e-217	1.51e-212	0.13	0.887
ENSG00000185627	PSMD13	3	-0.383283	8.09e-217	2.12e-212	0.037	0.729
ENSG00000120438	TCP1	3	-0.413877	8.5e-217	2.23e-212	0.074	0.796
ENSG00000130706	ADRM1	3	-0.433536	1.24e-216	3.25e-212	0.02	0.694
ENSG00000100353	EIF3D	3	-0.438124	1.33e-216	3.49e-212	0.103	0.855
ENSG00000163597	SNHG16	3	-0.457843	1.91e-216	5e-212	0.079	0.804
ENSG00000114784	EIF1B	3	-0.431315	4.35e-216	1.14e-211	0.017	0.688
ENSG00000138085	ATRAID	3	-0.373495	1.61e-215	4.23e-211	0.02	0.691
ENSG00000100348	TXN2	3	-0.373469	1.82e-215	4.78e-211	0.03	0.712
ENSG00000204387	SNHG32	3	-0.440402	2.03e-215	5.32e-211	0.024	0.698
ENSG00000008282	SYPL1	3	-0.383484	2.64e-215	6.91e-211	0.037	0.724
ENSG00000111229	ARPC3	3	-0.853954	2.91e-215	7.62e-211	0.188	0.933
ENSG00000257698	GIHCG	3	-0.514251	5.05e-215	1.32e-210	0.027	0.703
ENSG00000244038	DDOST	3	-0.403489	8.35e-215	2.19e-210	0.036	0.723
ENSG00000107262	BAG1	3	-0.419988	1.63e-214	4.28e-210	0.055	0.757
ENSG00000136167	LCP1	3	-0.538261	1.66e-214	4.35e-210	0.103	0.842
ENSG00000273841	TAF9	3	-0.409345	2.63e-214	6.88e-210	0.02	0.69
ENSG00000083099	LYRM2	3	-0.365034	4.11e-214	1.08e-209	0.019	0.687
ENSG00000108064	TFAM	3	-0.398537	5.73e-214	1.5e-209	0.04	0.728
ENSG00000135916	ITM2C	3	-0.429614	1.04e-213	2.73e-209	0.02	0.687
ENSG00000262814	MRPL12	3	-0.433966	2.1e-213	5.51e-209	0.04	0.725
ENSG00000136950	ARPC5L	3	-0.377918	2.61e-213	6.84e-209	0.035	0.718
ENSG00000141522	ARHGDIA	3	-0.42905	4.99e-213	1.31e-208	0.05	0.745
ENSG00000164924	YWHAZ	3	-0.42727	7.05e-213	1.85e-208	0.108	0.856
ENSG00000106244	PDAP1	3	-0.387934	1.35e-212	3.54e-208	0.084	0.808
ENSG00000128340	RAC2	3	-0.418926	1.74e-212	4.56e-208	0.062	0.765
ENSG00000172270	BSG	3	-0.390615	2.17e-212	5.69e-208	0.076	0.795
ENSG00000147669	POLR2K	3	-0.38392	4.41e-212	1.16e-207	0.016	0.678
ENSG00000006015	REX1BD	3	-0.367475	1.01e-211	2.65e-207	0.039	0.722
ENSG00000125977	EIF2S2	3	-0.674967	1.22e-211	3.19e-207	0.145	0.902
ENSG00000184840	TMED9	3	-0.400057	1.23e-211	3.23e-207	0.047	0.736
ENSG00000100219	XBP1	3	-0.501309	1.42e-211	3.72e-207	0.075	0.785
ENSG00000167552	TUBA1A	3	-0.42353	1.73e-211	4.53e-207	0.02	0.684
ENSG00000130731	METTL26	3	-0.421724	2.33e-211	6.1e-207	0.051	0.745
ENSG00000115875	SRSF7	3	-0.77482	2.6e-211	6.82e-207	0.145	0.883
ENSG00000176209	SMIM19	3	-0.381937	3.15e-211	8.25e-207	0.039	0.721
ENSG00000128609	NDUFA5	3	-0.357411	3.34e-211	8.75e-207	0.035	0.714
ENSG00000141873	SLC39A3	3	-0.367436	4.55e-211	1.19e-206	0.04	0.722
ENSG00000147419	CCDC25	3	-0.354662	4.98e-211	1.3e-206	0.035	0.711
ENSG00000105438	KDELR1	3	-0.3599	8.83e-211	2.31e-206	0.056	0.755
ENSG00000168273	SMIM4	3	-0.363238	1.83e-210	4.78e-206	0.03	0.7
ENSG00000037241	RPL26L1	3	-0.386523	2.3e-210	6.02e-206	0.021	0.685
ENSG00000173418	NAA20	3	-0.347414	8.08e-210	2.12e-205	0.07	0.779
ENSG00000163170	BOLA3	3	-0.386793	8.78e-210	2.3e-205	0.025	0.691
ENSG00000123179	EBPL	3	-0.431192	2.47e-209	6.47e-205	0.095	0.825
ENSG00000159210	SNF8	3	-0.374191	2.65e-209	6.95e-205	0.066	0.768
ENSG00000137076	TLN1	3	-0.423367	3.35e-209	8.78e-205	0.09	0.813
ENSG00000091164	TXNL1	3	-0.361992	3.76e-209	9.84e-205	0.055	0.748
ENSG00000112110	MRPL18	3	-0.358589	4.97e-209	1.3e-204	0.029	0.697
ENSG00000102409	BEX4	3	-0.376646	7.48e-209	1.96e-204	0.017	0.675
ENSG00000168894	RNF181	3	-0.366761	1.03e-208	2.71e-204	0.021	0.682
ENSG00000117614	SYF2	3	-0.358479	1.91e-208	5e-204	0.055	0.746
ENSG00000197448	GSTK1	3	-0.36895	2.68e-208	7.01e-204	0.076	0.787
ENSG00000103266	STUB1	3	-0.366736	2.95e-208	7.74e-204	0.042	0.723
ENSG00000166902	MRPL16	3	-0.345671	2.45e-207	6.43e-203	0.035	0.707
ENSG00000181610	MRPS23	3	-0.364513	2.71e-207	7.11e-203	0.036	0.71
ENSG00000100320	RBFOX2	3	-0.485917	7.51e-207	1.97e-202	0.128	0.883
ENSG00000124767	GLO1	3	-0.395067	8.14e-207	2.13e-202	0.075	0.781
ENSG00000136930	PSMB7	3	-0.395886	8.56e-207	2.24e-202	0.111	0.85
ENSG00000157916	RER1	3	-0.344192	1.27e-206	3.32e-202	0.065	0.762
ENSG00000266472	MRPS21	3	-0.484552	1.3e-206	3.4e-202	0.116	0.855
ENSG00000116030	SUMO1	3	-0.362646	1.46e-206	3.81e-202	0.081	0.795
ENSG00000128245	YWHAH	3	-0.366588	1.46e-206	3.83e-202	0.045	0.725
ENSG00000130741	EIF2S3	3	-0.383981	1.73e-206	4.54e-202	0.1	0.83
ENSG00000105669	COPE	3	-0.47928	1.78e-206	4.66e-202	0.12	0.859
ENSG00000114850	SSR3	3	-0.369291	1.84e-206	4.83e-202	0.044	0.721
ENSG00000087088	BAX	3	-0.34701	2.43e-206	6.37e-202	0.065	0.762
ENSG00000124802	EEF1E1	3	-0.363794	3.71e-206	9.72e-202	0.065	0.763
ENSG00000169714	CNBP	3	-0.593306	4.86e-206	1.27e-201	0.131	0.869
ENSG00000180964	TCEAL8	3	-0.338588	6.72e-206	1.76e-201	0.01	0.654
ENSG00000103035	PSMD7	3	-0.361599	9.14e-206	2.39e-201	0.096	0.82
ENSG00000186298	PPP1CC	3	-0.339541	1.1e-205	2.89e-201	0.045	0.723
ENSG00000205544	TMEM256	3	-0.369106	1.99e-205	5.22e-201	0.01	0.653
ENSG00000169738	DCXR	3	-0.389026	2.04e-205	5.34e-201	0.039	0.709
ENSG00000014641	MDH1	3	-0.338371	2.75e-205	7.21e-201	0.036	0.704
ENSG00000162191	UBXN1	3	-0.300623	3.41e-205	8.92e-201	0.065	0.762
ENSG00000081870	HSPB11	3	-0.363892	4.03e-205	1.06e-200	0.061	0.752
ENSG00000008952	SEC62	3	-0.366589	4.05e-205	1.06e-200	0.097	0.822
ENSG00000164713	BRI3	3	-0.344302	8.7e-205	2.28e-200	0.071	0.773
ENSG00000139233	LLPH	3	-0.327186	9.94e-205	2.6e-200	0.035	0.701
ENSG00000183527	PSMG1	3	-0.366929	1.56e-204	4.1e-200	0.037	0.704
ENSG00000155959	VBP1	3	-0.353992	1.68e-204	4.41e-200	0.022	0.675
ENSG00000083457	ITGAE	3	-0.372897	1.74e-204	4.54e-200	0.037	0.704
ENSG00000143155	TIPRL	3	-0.366774	2.81e-204	7.36e-200	0.032	0.693
ENSG00000126264	HCST	3	-0.435846	2.92e-204	7.65e-200	0.017	0.664
ENSG00000125656	CLPP	3	-0.358538	3.22e-204	8.43e-200	0.025	0.681
ENSG00000168303	MPLKIP	3	-0.368231	6.47e-204	1.7e-199	0.017	0.665
ENSG00000179010	MRFAP1	3	-0.382092	1.02e-203	2.68e-199	0.006	0.643
ENSG00000115286	NDUFS7	3	-0.352964	1.3e-203	3.39e-199	0.041	0.71
ENSG00000166337	TAF10	3	-0.35072	4.32e-203	1.13e-198	0.016	0.661
ENSG00000177105	RHOG	3	-0.377961	4.9e-203	1.28e-198	0.034	0.695
ENSG00000073584	SMARCE1	3	-0.317512	6.13e-203	1.61e-198	0.089	0.804
ENSG00000109861	CTSC	3	-0.379554	8.83e-203	2.31e-198	0.07	0.765
ENSG00000136521	NDUFB5	3	-0.347615	1.31e-202	3.44e-198	0.01	0.648
ENSG00000056050	HPF1	3	-0.360286	1.82e-202	4.76e-198	0.019	0.665
ENSG00000176101	SSNA1	3	-0.353317	2.45e-202	6.43e-198	0.025	0.676
ENSG00000171604	CXXC5	3	-0.403141	2.71e-202	7.1e-198	0.07	0.763
ENSG00000103490	PYCARD	3	-0.416189	2.74e-202	7.16e-198	0.01	0.647
ENSG00000132646	PCNA	3	-0.497677	4.01e-202	1.05e-197	0.045	0.711
ENSG00000163468	CCT3	3	-0.61031	9.76e-202	2.56e-197	0.142	0.877
ENSG00000148908	RGS10	3	-0.353265	1.07e-201	2.79e-197	0.084	0.791
ENSG00000242372	EIF6	3	-0.327302	1.09e-201	2.85e-197	0.042	0.711
ENSG00000103152	MPG	3	-0.328767	1.19e-201	3.12e-197	0.049	0.722
ENSG00000099622	CIRBP	3	-0.68264	5.05e-201	1.32e-196	0.172	0.916
ENSG00000174173	TRMT10C	3	-0.337129	5.51e-201	1.44e-196	0.031	0.685
ENSG00000104823	ECH1	3	-0.336354	5.71e-201	1.5e-196	0.035	0.695
ENSG00000078596	ITM2A	3	-0.418975	5.79e-201	1.52e-196	0.011	0.647
ENSG00000143321	HDGF	3	-0.372649	6.09e-201	1.6e-196	0.077	0.775
ENSG00000161981	SNRNP25	3	-0.373552	6.55e-201	1.72e-196	0.02	0.665
ENSG00000086598	TMED2	3	-0.339226	8.19e-201	2.15e-196	0.029	0.682
ENSG00000141759	TXNL4A	3	-0.389348	1.02e-200	2.67e-196	0.092	0.804
ENSG00000149547	EI24	3	-0.371786	1.06e-200	2.76e-196	0.027	0.678
ENSG00000143575	HAX1	3	-0.371417	1.29e-200	3.39e-196	0.016	0.657
ENSG00000120675	DNAJC15	3	-0.31883	1.92e-200	5.04e-196	0.044	0.712
ENSG00000172354	GNB2	3	-0.318349	2.85e-200	7.47e-196	0.031	0.687
ENSG00000176890	TYMS	3	-0.785082	3.02e-200	7.91e-196	0.105	0.802
ENSG00000177971	IMP3	3	-0.380723	3.61e-200	9.46e-196	0.016	0.655
ENSG00000155957	TMBIM4	3	-0.382521	6.35e-200	1.66e-195	0.08	0.775
ENSG00000137210	TMEM14B	3	-0.455117	1.22e-199	3.19e-195	0.132	0.875
ENSG00000235979	AC004448.2	3	-0.345578	1.9e-199	4.97e-195	0.012	0.646
ENSG00000105849	TWISTNB	3	-0.376422	3.08e-199	8.08e-195	0.047	0.713
ENSG00000164258	NDUFS4	3	-0.301881	3.32e-199	8.69e-195	0.095	0.807
ENSG00000143183	TMCO1	3	-0.326086	3.42e-199	8.97e-195	0.062	0.746
ENSG00000159593	NAE1	3	-0.379892	3.49e-199	9.14e-195	0.064	0.745
ENSG00000084754	HADHA	3	-0.351329	4.84e-199	1.27e-194	0.12	0.852
ENSG00000100764	PSMC1	3	-0.303492	5.34e-199	1.4e-194	0.077	0.775
ENSG00000165233	CARD19	3	-0.337199	1.82e-198	4.76e-194	0.022	0.665
ENSG00000116209	TMEM59	3	-0.325421	2.14e-198	5.6e-194	0.037	0.695
ENSG00000180992	MRPL14	3	-0.329929	2.75e-198	7.2e-194	0.021	0.661
ENSG00000106682	EIF4H	3	-0.298133	3.43e-198	8.98e-194	0.08	0.775
ENSG00000125901	MRPS26	3	-0.382547	3.99e-198	1.04e-193	0.031	0.681
ENSG00000170891	CYTL1	3	-0.465226	4.66e-198	1.22e-193	0.021	0.66
ENSG00000183688	RFLNB	3	-0.385153	1.79e-197	4.68e-193	0.069	0.753
ENSG00000108106	UBE2S	3	-0.530951	2.5e-197	6.54e-193	0.034	0.682
ENSG00000185825	BCAP31	3	-0.335962	2.83e-197	7.41e-193	0.049	0.713
ENSG00000122705	CLTA	3	-0.494238	4.91e-197	1.29e-192	0.143	0.882
ENSG00000183520	UTP11	3	-0.301608	7.26e-197	1.9e-192	0.037	0.691
ENSG00000258315	C17orf49	3	-0.377434	9.9e-197	2.59e-192	0.014	0.644
ENSG00000159377	PSMB4	3	-0.337142	1.02e-196	2.68e-192	0.021	0.659
ENSG00000160783	PMF1	3	-0.32101	1.45e-196	3.79e-192	0.095	0.803
ENSG00000167397	VKORC1	3	-0.364511	1.55e-196	4.06e-192	0.009	0.634
ENSG00000148229	POLE3	3	-0.335375	2.15e-196	5.64e-192	0.089	0.788
ENSG00000089063	TMEM230	3	-0.31799	2.27e-196	5.94e-192	0.05	0.716
ENSG00000072506	HSD17B10	3	-0.355303	2.39e-196	6.27e-192	0.007	0.631
ENSG00000177156	TALDO1	3	-0.563658	2.43e-196	6.37e-192	0.156	0.89
ENSG00000003056	M6PR	3	-0.305926	2.58e-196	6.75e-192	0.075	0.764
ENSG00000090273	NUDC	3	-0.42678	5.84e-196	1.53e-191	0.125	0.85
ENSG00000196465	MYL6B	3	-0.305623	8.44e-196	2.21e-191	0.03	0.675
ENSG00000125458	NT5C	3	-0.310219	1.02e-195	2.68e-191	0.049	0.711
ENSG00000109180	OCIAD1	3	-0.28116	1.21e-195	3.17e-191	0.095	0.801
ENSG00000118939	UCHL3	3	-0.311409	1.26e-195	3.3e-191	0.056	0.727
ENSG00000179085	DPM3	3	-0.328666	2.11e-195	5.54e-191	0.014	0.642
ENSG00000168002	POLR2G	3	-0.328291	2.43e-195	6.37e-191	0.022	0.659
ENSG00000102265	TIMP1	3	-0.43595	5.69e-195	1.49e-190	0.056	0.721
ENSG00000197006	METTL9	3	-0.310073	6.23e-195	1.63e-190	0.045	0.701
ENSG00000173207	CKS1B	3	-0.49982	6.28e-195	1.64e-190	0.022	0.654
ENSG00000172301	COPRS	3	-0.334073	7.48e-195	1.96e-190	0.016	0.645
ENSG00000109536	FRG1	3	-0.266946	9.34e-195	2.45e-190	0.069	0.748
ENSG00000008394	MGST1	3	-0.461699	1.05e-194	2.76e-190	0.075	0.752
ENSG00000203760	CENPW	3	-0.434716	1.19e-194	3.13e-190	0.005	0.623
ENSG00000128951	DUT	3	-0.935785	2.11e-194	5.51e-190	0.197	0.886
ENSG00000108826	MRPL27	3	-0.334119	2.2e-194	5.76e-190	0.026	0.663
ENSG00000213619	NDUFS3	3	-0.345065	2.61e-194	6.84e-190	0.059	0.726
ENSG00000242125	SNHG3	3	-0.423298	4.41e-194	1.16e-189	0.077	0.757
ENSG00000116171	SCP2	3	-0.296792	7.06e-194	1.85e-189	0.064	0.737
ENSG00000137692	DCUN1D5	3	-0.332127	7.4e-194	1.94e-189	0.061	0.73
ENSG00000133773	CCDC59	3	-0.343237	7.84e-194	2.05e-189	0.03	0.671
ENSG00000197894	ADH5	3	-0.273784	9.31e-194	2.44e-189	0.029	0.668
ENSG00000205220	PSMB10	3	-0.365577	9.66e-194	2.53e-189	0.02	0.651
ENSG00000125611	CHCHD5	3	-0.348355	9.91e-194	2.6e-189	0.007	0.626
ENSG00000145050	MANF	3	-0.383717	1.13e-193	2.97e-189	0.01	0.631
ENSG00000126934	MAP2K2	3	-0.294375	1.24e-193	3.24e-189	0.079	0.767
ENSG00000129128	SPCS3	3	-0.310441	1.45e-193	3.81e-189	0.054	0.718
ENSG00000166848	TERF2IP	3	-0.283376	2.38e-193	6.24e-189	0.051	0.712
ENSG00000169223	LMAN2	3	-0.299959	2.44e-193	6.38e-189	0.055	0.718
ENSG00000104529	EEF1D	3	-0.823576	3.71e-193	9.73e-189	0.227	0.938
ENSG00000097033	SH3GLB1	3	-0.256496	6.26e-193	1.64e-188	0.072	0.753
ENSG00000100142	POLR2F	3	-0.302754	1.21e-192	3.17e-188	0.06	0.729
ENSG00000121691	CAT	3	-0.325558	1.79e-192	4.68e-188	0.075	0.755
ENSG00000113732	ATP6V0E1	3	-0.299856	2.8e-192	7.35e-188	0.099	0.804
ENSG00000114209	PDCD10	3	-0.276781	2.94e-192	7.71e-188	0.069	0.744
ENSG00000150093	ITGB1	3	-0.290935	3.81e-192	9.98e-188	0.055	0.717
ENSG00000110536	PTPMT1	3	-0.334199	5.3e-192	1.39e-187	0.011	0.629
ENSG00000074842	MYDGF	3	-0.365449	7.96e-192	2.09e-187	0.07	0.742
ENSG00000136732	GYPC	3	-0.466749	8.72e-192	2.28e-187	0.108	0.815
ENSG00000128272	ATF4	3	-0.336818	1.05e-191	2.74e-187	0.08	0.763
ENSG00000144848	ATG3	3	-0.284703	1.52e-191	3.97e-187	0.042	0.691
ENSG00000158864	NDUFS2	3	-0.305549	1.87e-191	4.89e-187	0.054	0.713
ENSG00000111906	HDDC2	3	-0.346861	2.13e-191	5.58e-187	0.02	0.646
ENSG00000090263	MRPS33	3	-0.341685	3.04e-191	7.96e-187	0.027	0.66
ENSG00000158716	DUSP23	3	-0.345411	3.15e-191	8.25e-187	0.009	0.624
ENSG00000162585	FAAP20	3	-0.311117	4.27e-191	1.12e-186	0.032	0.67
ENSG00000146731	CCT6A	3	-0.514153	4.66e-191	1.22e-186	0.143	0.865
ENSG00000088205	DDX18	3	-0.342235	5.23e-191	1.37e-186	0.118	0.836
ENSG00000117632	STMN1	3	-0.843152	8.37e-191	2.19e-186	0.185	0.886
ENSG00000128789	PSMG2	3	-0.267737	1.24e-190	3.24e-186	0.075	0.751
ENSG00000115233	PSMD14	3	-0.282349	2.35e-190	6.14e-186	0.102	0.809
ENSG00000113811	SELENOK	3	-0.355241	4.89e-190	1.28e-185	0.015	0.633
ENSG00000125652	ALKBH7	3	-0.313032	6.7e-190	1.75e-185	0.016	0.636
ENSG00000198791	CNOT7	3	-0.285251	8.56e-190	2.24e-185	0.031	0.666
ENSG00000160014	CALM3	3	-0.326156	1.25e-189	3.27e-185	0.024	0.65
ENSG00000102172	SMS	3	-0.292008	1.39e-189	3.64e-185	0.064	0.729
ENSG00000171421	MRPL36	3	-0.355822	1.49e-189	3.9e-185	0.01	0.622
ENSG00000104408	EIF3E	3	-0.711213	3.46e-189	9.05e-185	0.206	0.926
ENSG00000122545	SEPTIN7	3	-0.557918	3.75e-189	9.81e-185	0.177	0.91
ENSG00000213551	DNAJC9	3	-0.343142	4.07e-189	1.07e-184	0.064	0.728
ENSG00000138071	ACTR2	3	-0.509619	1.36e-188	3.55e-184	0.16	0.891
ENSG00000136146	MED4	3	-0.253483	1.37e-188	3.59e-184	0.09	0.782
ENSG00000171202	TMEM126A	3	-0.322424	1.6e-188	4.2e-184	0.012	0.626
ENSG00000067225	PKM	3	-0.48686	4.44e-188	1.16e-183	0.165	0.891
ENSG00000008324	SS18L2	3	-0.292984	9.46e-188	2.48e-183	0.027	0.654
ENSG00000110801	PSMD9	3	-0.28201	9.5e-188	2.49e-183	0.046	0.691
ENSG00000174059	CD34	3	-0.437996	1.23e-187	3.23e-183	0.112	0.812
ENSG00000123975	CKS2	3	-0.485279	1.64e-187	4.29e-183	0.027	0.651
ENSG00000187735	TCEA1	3	-0.449768	1.82e-187	4.77e-183	0.148	0.876
ENSG00000130312	MRPL34	3	-0.301689	1.91e-187	5e-183	0.037	0.673
ENSG00000175166	PSMD2	3	-0.319327	2.81e-187	7.36e-183	0.082	0.761
ENSG00000111237	VPS29	3	-0.282219	3.21e-187	8.4e-183	0.086	0.768
ENSG00000105968	H2AFV	3	-0.389711	3.25e-187	8.51e-183	0.126	0.838
ENSG00000128699	ORMDL1	3	-0.26174	3.45e-187	9.02e-183	0.071	0.739
ENSG00000285080	AC068724.3	3	-0.298841	4.26e-187	1.12e-182	0.025	0.646
ENSG00000151500	THYN1	3	-0.311545	4.28e-187	1.12e-182	0.017	0.633
ENSG00000140612	SEC11A	3	-0.329796	4.51e-187	1.18e-182	0.111	0.817
ENSG00000087365	SF3B2	3	-0.318811	5.26e-187	1.38e-182	0.117	0.829
ENSG00000168701	TMEM208	3	-0.336258	7.82e-187	2.05e-182	0.009	0.615
ENSG00000141543	EIF4A3	3	-0.266526	9.94e-187	2.6e-182	0.034	0.663
ENSG00000091317	CMTM6	3	-0.317136	1.1e-186	2.88e-182	0.016	0.629
ENSG00000067560	RHOA	3	-0.425294	1.39e-186	3.65e-182	0.165	0.896
ENSG00000167515	TRAPPC2L	3	-0.342882	1.49e-186	3.91e-182	0.016	0.627
ENSG00000270170	NCBP2AS2	3	-0.347445	1.69e-186	4.44e-182	0.007	0.612
ENSG00000099817	POLR2E	3	-0.300769	3.41e-186	8.92e-182	0.05	0.695
ENSG00000116221	MRPL37	3	-0.296913	3.65e-186	9.55e-182	0.031	0.658
ENSG00000204482	LST1	3	-0.338353	4.04e-186	1.06e-181	0.046	0.686
ENSG00000170540	ARL6IP1	3	-0.376328	4.55e-186	1.19e-181	0.052	0.697
ENSG00000182180	MRPS16	3	-0.328468	4.8e-186	1.26e-181	0.03	0.655
ENSG00000104903	LYL1	3	-0.289292	4.85e-186	1.27e-181	0.081	0.755
ENSG00000109534	GAR1	3	-0.258925	6.19e-186	1.62e-181	0.042	0.68
ENSG00000069849	ATP1B3	3	-0.326843	6.33e-186	1.66e-181	0.107	0.806
ENSG00000130560	UBAC1	3	-0.270416	7.82e-186	2.05e-181	0.049	0.693
ENSG00000100365	NCF4	3	-0.325324	8.16e-186	2.14e-181	0.046	0.688
ENSG00000115685	PPP1R7	3	-0.269961	9.74e-186	2.55e-181	0.039	0.672
ENSG00000023191	RNH1	3	-0.338822	1.2e-185	3.15e-181	0.014	0.622
ENSG00000172336	POP7	3	-0.353339	1.26e-185	3.29e-181	0.006	0.607
ENSG00000171490	RSL1D1	3	-0.483517	1.45e-185	3.8e-181	0.147	0.867
ENSG00000167792	NDUFV1	3	-0.327055	2.96e-185	7.76e-181	0.107	0.802
ENSG00000182054	IDH2	3	-0.358821	3.56e-185	9.33e-181	0.116	0.815
ENSG00000148444	COMMD3	3	-0.320238	5.94e-185	1.56e-180	0.015	0.622
ENSG00000135535	CD164	3	-0.268877	6.4e-185	1.68e-180	0.079	0.75
ENSG00000168288	MMADHC	3	-0.27563	6.85e-185	1.79e-180	0.03	0.653
ENSG00000175416	CLTB	3	-0.308108	8.27e-185	2.17e-180	0.03	0.653
ENSG00000137038	DMAC1	3	-0.341641	9.99e-185	2.62e-180	0.009	0.611
ENSG00000101439	CST3	3	-0.357562	1.18e-184	3.09e-180	0.009	0.61
ENSG00000165704	HPRT1	3	-0.262353	1.2e-184	3.15e-180	0.095	0.784
ENSG00000163541	SUCLG1	3	-0.253507	1.27e-184	3.33e-180	0.045	0.681
ENSG00000172543	CTSW	3	-0.323407	1.44e-184	3.77e-180	0.022	0.638
ENSG00000134049	IER3IP1	3	-0.299487	2.02e-184	5.29e-180	0.037	0.667
ENSG00000002549	LAP3	3	-0.274104	3.62e-184	9.49e-180	0.051	0.692
ENSG00000143612	C1orf43	3	-0.277948	3.84e-184	1.01e-179	0.097	0.787
ENSG00000183684	ALYREF	3	-0.284884	3.91e-184	1.02e-179	0.03	0.652
ENSG00000117984	CTSD	3	-0.276594	5.81e-184	1.52e-179	0.042	0.677
ENSG00000102898	NUTF2	3	-0.266337	6.78e-184	1.77e-179	0.044	0.678
ENSG00000160075	SSU72	3	-0.263807	8.04e-184	2.11e-179	0.077	0.745
ENSG00000153037	SRP19	3	-0.269992	1.29e-183	3.38e-179	0.056	0.703
ENSG00000153044	CENPH	3	-0.301247	1.34e-183	3.5e-179	0.074	0.737
ENSG00000110108	TMEM109	3	-0.328174	2.47e-183	6.46e-179	0.006	0.603
ENSG00000272047	GTF2H5	3	-0.326976	3.92e-183	1.03e-178	0.024	0.636
ENSG00000034713	GABARAPL2	3	-0.308736	7.98e-183	2.09e-178	0.01	0.609
ENSG00000110200	ANAPC15	3	-0.314408	8.34e-183	2.18e-178	0.016	0.622
ENSG00000146007	ZMAT2	3	-0.292769	8.43e-183	2.21e-178	0.041	0.669
ENSG00000151465	CDC123	3	-0.281298	8.77e-183	2.3e-178	0.111	0.81
ENSG00000060688	SNRNP40	3	-0.272875	1.44e-182	3.76e-178	0.069	0.723
ENSG00000185222	TCEAL9	3	-0.33314	1.44e-182	3.76e-178	0.019	0.626
ENSG00000160948	VPS28	3	-0.254996	1.72e-182	4.52e-178	0.045	0.679
ENSG00000198431	TXNRD1	3	-0.521178	3e-182	7.85e-178	0.18	0.919
ENSG00000017797	RALBP1	3	-0.252589	3.31e-182	8.66e-178	0.099	0.784
ENSG00000141858	SAMD1	3	-0.278961	3.7e-182	9.7e-178	0.035	0.656
ENSG00000167461	RAB8A	3	-0.273946	7.38e-182	1.93e-177	0.079	0.741
ENSG00000121851	POLR3GL	3	-0.314477	1.12e-181	2.94e-177	0.025	0.636
ENSG00000119421	NDUFA8	3	-0.325479	2.71e-181	7.1e-177	0.015	0.616
ENSG00000161011	SQSTM1	3	-0.33308	4.35e-181	1.14e-176	0.067	0.716
ENSG00000131876	SNRPA1	3	-0.293383	6.74e-181	1.77e-176	0.108	0.799
ENSG00000108055	SMC3	3	-0.302783	7.91e-181	2.07e-176	0.118	0.815
ENSG00000157500	APPL1	3	-0.276105	1.01e-180	2.63e-176	0.101	0.785
ENSG00000143401	ANP32E	3	-0.301884	2.41e-180	6.3e-176	0.064	0.708
ENSG00000105364	MRPL4	3	-0.256885	2.51e-180	6.58e-176	0.087	0.753
ENSG00000125445	MRPS7	3	-0.296191	2.75e-180	7.2e-176	0.025	0.633
ENSG00000133398	MED10	3	-0.324343	3.02e-180	7.91e-176	0.021	0.625
ENSG00000184897	H1FX	3	-0.450361	3.47e-180	9.09e-176	0.045	0.67
ENSG00000149932	TMEM219	3	-0.251723	3.48e-180	9.11e-176	0.045	0.673
ENSG00000247596	TWF2	3	-0.278443	3.83e-180	1e-175	0.021	0.626
ENSG00000167642	SPINT2	3	-0.306542	3.89e-180	1.02e-175	0.017	0.619
ENSG00000134001	EIF2S1	3	-0.258602	3.99e-180	1.04e-175	0.064	0.708
ENSG00000164611	PTTG1	3	-0.488836	4.15e-180	1.09e-175	0.022	0.627
ENSG00000111615	KRR1	3	-0.254431	5.73e-180	1.5e-175	0.06	0.702
ENSG00000069345	DNAJA2	3	-0.274351	6.43e-180	1.68e-175	0.027	0.638
ENSG00000133703	KRAS	3	-0.286703	1.14e-179	2.99e-175	0.036	0.654
ENSG00000164163	ABCE1	3	-0.319858	2.46e-179	6.44e-175	0.108	0.795
ENSG00000166228	PCBD1	3	-0.335679	2.89e-179	7.58e-175	0.012	0.606
ENSG00000113312	TTC1	3	-0.262858	3.52e-179	9.23e-175	0.091	0.764
ENSG00000204568	MRPS18B	3	-0.291388	3.93e-179	1.03e-174	0.036	0.652
ENSG00000130511	SSBP4	3	-0.278226	5.8e-179	1.52e-174	0.084	0.748
ENSG00000165119	HNRNPK	3	-0.518705	5.87e-179	1.54e-174	0.181	0.904
ENSG00000083937	CHMP2B	3	-0.295527	5.88e-179	1.54e-174	0.012	0.606
ENSG00000147155	EBP	3	-0.267169	6.89e-179	1.8e-174	0.024	0.628
ENSG00000060138	YBX3	3	-0.524177	9.33e-179	2.44e-174	0.163	0.881
ENSG00000163636	PSMD6	3	-0.297706	1.45e-178	3.8e-174	0.025	0.631
ENSG00000273611	ZNHIT3	3	-0.309825	1.57e-178	4.11e-174	0.017	0.616
ENSG00000131828	PDHA1	3	-0.256399	3.34e-178	8.76e-174	0.029	0.637
ENSG00000140350	ANP32A	3	-0.318542	4.8e-178	1.26e-173	0.138	0.845
ENSG00000110696	C11orf58	3	-0.366261	5.82e-178	1.53e-173	0.161	0.883
ENSG00000105701	FKBP8	3	-0.293062	5.83e-178	1.53e-173	0.03	0.638
ENSG00000115091	ACTR3	3	-0.276432	6.88e-178	1.8e-173	0.122	0.818
ENSG00000063241	ISOC2	3	-0.312336	8.66e-178	2.27e-173	0.027	0.634
ENSG00000164323	CFAP97	3	-0.259938	1.72e-177	4.5e-173	0.047	0.672
ENSG00000112312	GMNN	3	-0.313677	2.18e-177	5.71e-173	0.051	0.679
ENSG00000198721	ECI2	3	-0.277994	3.01e-177	7.88e-173	0.026	0.63
ENSG00000162961	DPY30	3	-0.261228	7.28e-177	1.91e-172	0.026	0.629
ENSG00000048544	MRPS10	3	-0.269257	7.34e-177	1.92e-172	0.03	0.636
ENSG00000185608	MRPL40	3	-0.302324	8.23e-177	2.16e-172	0.015	0.606
ENSG00000117362	APH1A	3	-0.294111	8.78e-177	2.3e-172	0.015	0.607
ENSG00000055950	MRPL43	3	-0.305704	9.18e-177	2.41e-172	0.01	0.597
ENSG00000076043	REXO2	3	-0.300532	1.04e-176	2.73e-172	0.016	0.609
ENSG00000068697	LAPTM4A	3	-0.267619	1.56e-176	4.1e-172	0.035	0.645
ENSG00000134308	YWHAQ	3	-0.312386	1.68e-176	4.4e-172	0.136	0.84
ENSG00000167272	POP5	3	-0.300713	1.91e-176	5.01e-172	0.006	0.588
ENSG00000100321	SYNGR1	3	-0.285239	2.63e-176	6.88e-172	0.082	0.738
ENSG00000110958	PTGES3	3	-0.632873	2.96e-176	7.74e-172	0.201	0.916
ENSG00000085063	CD59	3	-0.26575	3.1e-176	8.11e-172	0.03	0.635
ENSG00000136938	ANP32B	3	-0.807743	3.84e-176	1e-171	0.294	0.946
ENSG00000136628	EPRS	3	-0.270209	4.73e-176	1.24e-171	0.108	0.789
ENSG00000141030	COPS3	3	-0.278354	9.75e-176	2.55e-171	0.092	0.76
ENSG00000168393	DTYMK	3	-0.305486	1.14e-175	2.99e-171	0.032	0.639
ENSG00000079462	PAFAH1B3	3	-0.307018	2.3e-175	6.02e-171	0.019	0.611
ENSG00000148362	PAXX	3	-0.282578	9.89e-175	2.59e-170	0.045	0.662
ENSG00000115484	CCT4	3	-0.286941	1.13e-174	2.96e-170	0.143	0.852
ENSG00000115364	MRPL19	3	-0.255806	1.21e-174	3.16e-170	0.042	0.657
ENSG00000187109	NAP1L1	3	-0.902317	1.22e-174	3.2e-170	0.33	0.951
ENSG00000164754	RAD21	3	-0.270192	1.47e-174	3.84e-170	0.096	0.761
ENSG00000107874	CUEDC2	3	-0.265254	1.57e-174	4.1e-170	0.024	0.62
ENSG00000080824	HSP90AA1	3	-0.993473	2.7e-174	7.08e-170	0.352	0.943
ENSG00000189159	JPT1	3	-0.291143	3.51e-174	9.2e-170	0.065	0.699
ENSG00000198546	ZNF511	3	-0.283829	5.06e-174	1.33e-169	0.021	0.613
ENSG00000196139	AKR1C3	3	-0.320399	8.07e-174	2.11e-169	0.012	0.595
ENSG00000218739	CEBPZOS	3	-0.25812	1.32e-173	3.46e-169	0.036	0.643
ENSG00000198840	MT-ND3	3	2.46485	1.46e-173	3.83e-169	0.933	0.961
ENSG00000162910	MRPL55	3	-0.270674	1.78e-173	4.67e-169	0.027	0.624
ENSG00000092621	PHGDH	3	-0.276603	2.76e-173	7.22e-169	0.072	0.711
ENSG00000010256	UQCRC1	3	-0.255158	2.89e-173	7.56e-169	0.035	0.639
ENSG00000112096	SOD2	3	-0.307007	3.49e-173	9.13e-169	0.06	0.687
ENSG00000066379	ZNRD1	3	-0.280162	8.7e-173	2.28e-168	0.019	0.606
ENSG00000140365	COMMD4	3	-0.26427	1.38e-172	3.6e-168	0.039	0.645
ENSG00000163565	IFI16	3	-0.376948	1.57e-172	4.11e-168	0.1	0.756
ENSG00000213625	LEPROT	3	-0.275106	2.6e-172	6.82e-168	0.025	0.617
ENSG00000142864	SERBP1	3	-0.79091	2.77e-172	7.25e-168	0.274	0.938
ENSG00000118971	CCND2	3	-0.289141	3.71e-172	9.71e-168	0.102	0.77
ENSG00000142684	ZNF593	3	-0.298716	4.65e-172	1.22e-167	0.022	0.609
ENSG00000116752	BCAS2	3	-0.288177	7.07e-172	1.85e-167	0.022	0.611
ENSG00000128463	EMC4	3	-0.291487	7.17e-172	1.88e-167	0.015	0.595
ENSG00000101220	C20orf27	3	-0.287569	1.14e-171	2.98e-167	0.011	0.589
ENSG00000100612	DHRS7	3	-0.257612	2.27e-171	5.94e-167	0.019	0.602
ENSG00000104472	CHRAC1	3	-0.281214	2.58e-171	6.76e-167	0.014	0.593
ENSG00000136261	BZW2	3	-0.278436	2.71e-171	7.1e-167	0.133	0.828
ENSG00000124383	MPHOSPH10	3	-0.269765	3.52e-171	9.23e-167	0.051	0.667
ENSG00000181991	MRPS11	3	-0.258265	4.11e-171	1.08e-166	0.031	0.628
ENSG00000119655	NPC2	3	-0.303337	4.45e-171	1.17e-166	0.016	0.597
ENSG00000087460	GNAS	3	-0.781291	5.45e-171	1.43e-166	0.273	0.95
ENSG00000122565	CBX3	3	-0.538623	7.02e-171	1.84e-166	0.178	0.888
ENSG00000111678	C12orf57	3	-0.338138	2.08e-170	5.46e-166	0.012	0.588
ENSG00000164111	ANXA5	3	-0.396716	3.69e-170	9.66e-166	0.017	0.597
ENSG00000196507	TCEAL3	3	-0.301373	4.66e-170	1.22e-165	0.009	0.58
ENSG00000177469	CAVIN1	3	-0.32378	1.14e-169	2.97e-165	0.047	0.654
ENSG00000213722	DDAH2	3	-0.273203	1.52e-169	3.97e-165	0.025	0.612
ENSG00000145354	CISD2	3	-0.254764	3.97e-169	1.04e-164	0.031	0.622
ENSG00000175324	LSM1	3	-0.263643	5.12e-169	1.34e-164	0.015	0.591
ENSG00000136003	ISCU	3	-0.253309	5.88e-169	1.54e-164	0.032	0.625
ENSG00000134153	EMC7	3	-0.279302	6.05e-169	1.58e-164	0.02	0.6
ENSG00000120833	SOCS2	3	-0.286583	6.23e-169	1.63e-164	0.027	0.615
ENSG00000179918	SEPHS2	3	-0.273333	1.03e-168	2.7e-164	0.015	0.589
ENSG00000044574	HSPA5	3	-0.250786	2.05e-167	5.37e-163	0.079	0.711
ENSG00000174780	SRP72	3	-0.3486	2.16e-167	5.65e-163	0.147	0.844
ENSG00000099783	HNRNPM	3	-0.456162	3.77e-167	9.87e-163	0.197	0.918
ENSG00000131871	SELENOS	3	-0.272582	7.04e-167	1.85e-162	0.014	0.583
ENSG00000154473	BUB3	3	-0.265107	4.32e-166	1.13e-161	0.035	0.623
ENSG00000114503	NCBP2	3	-0.252374	4.66e-166	1.22e-161	0.026	0.606
ENSG00000175701	MTLN	3	-0.297191	6.58e-166	1.72e-161	0.011	0.576
ENSG00000178057	NDUFAF3	3	-0.307644	6.99e-166	1.83e-161	0.002	0.559
ENSG00000009307	CSDE1	3	-0.402469	8.01e-166	2.1e-161	0.175	0.884
ENSG00000172889	EGFL7	3	-0.355587	1.07e-165	2.81e-161	0.145	0.825
ENSG00000163344	PMVK	3	-0.264515	1.36e-165	3.57e-161	0.014	0.581
ENSG00000124795	DEK	3	-0.712059	2.44e-165	6.39e-161	0.249	0.926
ENSG00000128050	PAICS	3	-0.326378	2.76e-165	7.22e-161	0.132	0.81
ENSG00000164898	FMC1	3	-0.284891	4.38e-165	1.15e-160	0.007	0.567
ENSG00000181817	LSM10	3	-0.300197	4.39e-165	1.15e-160	0.01	0.572
ENSG00000183617	MRPL54	3	-0.296723	6.13e-165	1.61e-160	0.012	0.577
ENSG00000126088	UROD	3	-0.256838	6.23e-165	1.63e-160	0.029	0.609
ENSG00000198937	CCDC167	3	-0.261413	8.26e-165	2.16e-160	0.019	0.589
ENSG00000183971	NPW	3	-0.459119	4.86e-164	1.27e-159	0.026	0.598
ENSG00000029993	HMGB3	3	-0.313292	1.4e-163	3.68e-159	0.025	0.597
ENSG00000226777	FAM30A	3	-0.708215	1.58e-163	4.14e-159	0.207	0.874
ENSG00000167004	PDIA3	3	-0.289527	3.22e-163	8.43e-159	0.135	0.812
ENSG00000256537	SMIM10L1	3	-0.263849	5.25e-163	1.38e-158	0.021	0.59
ENSG00000130826	DKC1	3	-0.274978	8.24e-163	2.16e-158	0.13	0.796
ENSG00000100664	EIF5	3	-0.377681	8.85e-163	2.32e-158	0.163	0.861
ENSG00000156587	UBE2L6	3	-0.277841	1.4e-162	3.66e-158	0.016	0.579
ENSG00000169813	HNRNPF	3	-0.288687	1.69e-162	4.44e-158	0.165	0.865
ENSG00000128185	DGCR6L	3	-0.259895	1.57e-161	4.11e-157	0.02	0.584
ENSG00000184924	PTRHD1	3	-0.265175	1.92e-161	5.02e-157	0.009	0.562
ENSG00000166582	CENPV	3	-0.278714	3.24e-161	8.5e-157	0.026	0.596
ENSG00000173465	ZNRD2	3	-0.287168	4.42e-161	1.16e-156	0.01	0.563
ENSG00000143106	PSMA5	3	-0.25427	5.58e-161	1.46e-156	0.146	0.833
ENSG00000107833	NPM3	3	-0.296296	6.69e-161	1.75e-156	0.006	0.555
ENSG00000166260	COX11	3	-0.262379	9.07e-161	2.38e-156	0.019	0.58
ENSG00000158042	MRPL17	3	-0.253569	1.89e-160	4.96e-156	0.012	0.567
ENSG00000132661	NXT1	3	-0.277787	2.58e-160	6.77e-156	0.011	0.563
ENSG00000164109	MAD2L1	3	-0.347705	3.45e-160	9.03e-156	0.017	0.576
ENSG00000118508	RAB32	3	-0.277412	4.74e-160	1.24e-155	0.02	0.58
ENSG00000114744	COMMD2	3	-0.250813	5.21e-160	1.36e-155	0.021	0.582
ENSG00000173221	GLRX	3	-0.267359	1.45e-159	3.8e-155	0.014	0.567
ENSG00000161980	POLR3K	3	-0.264824	1.87e-159	4.9e-155	0.019	0.577
ENSG00000185651	UBE2L3	3	-0.313618	3.8e-159	9.96e-155	0.162	0.856
ENSG00000163382	NAXE	3	-0.266412	6.58e-159	1.72e-154	0.009	0.556
ENSG00000198712	MT-CO2	3	2.33561	1.83e-158	4.79e-154	0.964	0.974
ENSG00000168496	FEN1	3	-0.28921	3.34e-158	8.75e-154	0.017	0.57
ENSG00000100650	SRSF5	3	-0.259829	4.34e-157	1.14e-152	0.163	0.853
ENSG00000163931	TKT	3	-0.317473	4.64e-157	1.21e-152	0.171	0.863
ENSG00000115350	POLE4	3	-0.263472	7.9e-155	2.07e-150	0.006	0.542
ENSG00000120885	CLU	3	-0.315762	9.91e-154	2.6e-149	0.012	0.552
ENSG00000165527	ARF6	3	-0.251337	1.31e-153	3.44e-149	0.011	0.549
ENSG00000213654	GPSM3	3	-0.26841	2.88e-153	7.54e-149	0.007	0.541
ENSG00000131475	VPS25	3	-0.263304	3.55e-153	9.3e-149	0.011	0.547
ENSG00000095932	SMIM24	3	-0.300102	4.63e-153	1.21e-148	0.012	0.55
ENSG00000179218	CALR	3	-0.547847	7.04e-153	1.84e-148	0.208	0.874
ENSG00000228300	FAM174C	3	-0.256884	2.25e-152	5.9e-148	0.012	0.549
ENSG00000168275	COA6	3	-0.255255	2.56e-152	6.7e-148	0.016	0.555
ENSG00000110492	MDK	3	-0.349212	2.79e-152	7.31e-148	0.009	0.54
ENSG00000198899	MT-ATP6	3	2.36056	6.26e-151	1.64e-146	0.945	0.964
ENSG00000132603	NIP7	3	-0.254733	8.43e-151	2.21e-146	0.016	0.553
ENSG00000260032	NORAD	3	-0.252674	9.2e-151	2.41e-146	0.027	0.574
ENSG00000188820	CALHM6	3	-0.269793	1.16e-150	3.03e-146	0.01	0.54
ENSG00000142089	IFITM3	3	-0.287725	3.21e-150	8.41e-146	0.014	0.547
ENSG00000115053	NCL	3	-0.727647	3.47e-150	9.09e-146	0.456	0.955
ENSG00000160446	ZDHHC12	3	-0.257459	1.13e-148	2.97e-144	0.007	0.53
ENSG00000242259	C22orf39	3	-0.251408	2.46e-148	6.46e-144	0.01	0.534
ENSG00000183336	BOLA2	3	-0.258101	7.08e-148	1.86e-143	0.012	0.539
ENSG00000228716	DHFR	3	-0.291054	1.44e-147	3.78e-143	0.067	0.644
ENSG00000004059	ARF5	3	-0.273599	2.82e-147	7.38e-143	0.002	0.517
ENSG00000110852	CLEC2B	3	-0.257801	9.14e-147	2.39e-142	0.029	0.568
ENSG00000213246	SUPT4H1	3	-0.264329	1.78e-146	4.67e-142	0.014	0.537
ENSG00000121774	KHDRBS1	3	-0.299	6.98e-146	1.83e-141	0.19	0.876
ENSG00000115241	PPM1G	3	-0.397398	9.94e-146	2.6e-141	0.188	0.856
ENSG00000241370	RPP21	3	-0.259392	1.41e-145	3.69e-141	0.011	0.531
ENSG00000164104	HMGB2	3	-0.611583	1.91e-145	5.01e-141	0.181	0.816
ENSG00000119632	IFI27L2	3	-0.263266	4.29e-145	1.12e-140	0.01	0.527
ENSG00000137880	GCHFR	3	-0.277332	8.13e-145	2.13e-140	0.007	0.521
ENSG00000187608	ISG15	3	-0.364683	2.66e-143	6.98e-139	0.011	0.525
ENSG00000175130	MARCKSL1	3	-0.312475	4.54e-142	1.19e-137	0.006	0.512
ENSG00000170144	HNRNPA3	3	-0.375479	4.63e-142	1.21e-137	0.232	0.912
ENSG00000196419	XRCC6	3	-0.252119	2.6e-136	6.8e-132	0.203	0.875
ENSG00000160888	IER2	3	-0.267601	1.22e-135	3.2e-131	0.029	0.541
ENSG00000119314	PTBP3	3	-0.272172	1.53e-135	4e-131	0.173	0.823
ENSG00000135046	ANXA1	3	-0.367111	1.68e-135	4.4e-131	0.217	0.894
ENSG00000051523	CYBA	3	-0.668765	1.02e-134	2.67e-130	0.291	0.912
ENSG00000092201	SUPT16H	3	-0.277022	2.24e-132	5.87e-128	0.2	0.858
ENSG00000198804	MT-CO1	3	2.16946	9.58e-132	2.51e-127	0.921	0.958
ENSG00000213316	LTC4S	3	-0.25659	2.02e-131	5.3e-127	0.016	0.507
ENSG00000133169	BEX1	3	-0.371022	2.03e-131	5.31e-127	0.014	0.501
ENSG00000166803	PCLAF	3	-0.477495	6.25e-131	1.64e-126	0.151	0.746
ENSG00000171695	LKAAEAR1	3	-0.267887	9.57e-131	2.51e-126	0.009	0.489
ENSG00000147065	MSN	3	-0.343561	3.09e-130	8.09e-126	0.231	0.892
ENSG00000167799	NUDT8	3	-0.264122	3.95e-130	1.04e-125	0.011	0.493
ENSG00000196735	HLA-DQA1	3	-0.293978	3.19e-127	8.35e-123	0.022	0.508
ENSG00000197111	PCBP2	3	-0.262565	4.29e-125	1.12e-120	0.214	0.884
ENSG00000138668	HNRNPD	3	-0.412785	4.48e-125	1.17e-120	0.267	0.921
ENSG00000124575	HIST1H1D	3	-0.464595	3.51e-122	9.2e-118	0.057	0.559
ENSG00000198938	MT-CO3	3	2.25692	7.54e-122	1.98e-117	0.939	0.964
ENSG00000188486	H2AFX	3	-0.254598	3.48e-121	9.11e-117	0.009	0.466
ENSG00000079246	XRCC5	3	-0.486854	1.49e-120	3.89e-116	0.291	0.932
ENSG00000198763	MT-ND2	3	2.05586	3.1e-119	8.13e-115	0.883	0.951
ENSG00000144381	HSPD1	3	-0.579721	8.06e-119	2.11e-114	0.299	0.911
ENSG00000010278	CD9	3	-0.272347	1.07e-115	2.8e-111	0.016	0.466
ENSG00000108424	KPNB1	3	-0.396808	1.59e-115	4.16e-111	0.269	0.89
ENSG00000161960	EIF4A1	3	-0.645937	6.01e-115	1.58e-110	0.368	0.948
ENSG00000198727	MT-CYB	3	2.10235	6.65e-115	1.74e-110	0.87	0.941
ENSG00000211772	TRBC2	3	-0.253725	2.96e-114	7.76e-110	0.011	0.452
ENSG00000228253	MT-ATP8	3	2.49885	8.79e-114	2.3e-109	0.744	0.858
ENSG00000133639	BTG1	3	-0.263065	3.97e-112	1.04e-107	0.016	0.456
ENSG00000198786	MT-ND5	3	2.1452	3.81e-109	9.98e-105	0.772	0.913
ENSG00000187837	HIST1H1C	3	-0.329421	1.15e-108	3e-104	0.032	0.477
ENSG00000147649	MTDH	3	-0.392139	1.66e-108	4.35e-104	0.274	0.898
ENSG00000125944	HNRNPR	3	-0.296234	1.58e-107	4.13e-103	0.264	0.898
ENSG00000152518	ZFP36L2	3	-0.368654	3.11e-106	8.15e-102	0.263	0.859
ENSG00000089685	BIRC5	3	-0.339833	2.6e-103	6.8e-99	0.039	0.474
ENSG00000069275	NUCKS1	3	-0.529941	1.98e-100	5.2e-96	0.365	0.937
ENSG00000122566	HNRNPA2B1	3	-0.311414	2.22e-100	5.82e-96	0.403	0.963
ENSG00000092199	HNRNPC	3	-0.353542	1.35e-99	3.54e-95	0.31	0.929
ENSG00000198888	MT-ND1	3	2.11228	1.95e-98	5.11e-94	0.89	0.948
ENSG00000070081	NUCB2	3	-0.275696	3.39e-97	8.87e-93	0.267	0.875
ENSG00000184260	HIST2H2AC	3	-0.325984	4.9e-96	1.28e-91	0.012	0.403
ENSG00000113648	H2AFY	3	-0.42737	5.63e-96	1.47e-91	0.357	0.94
ENSG00000211899	IGHM	3	-0.26003	7.91e-96	2.07e-91	0.044	0.464
ENSG00000175063	UBE2C	3	-0.348023	2.74e-94	7.17e-90	0.016	0.405
ENSG00000169756	LIMS1	3	-0.297715	1.08e-85	2.83e-81	0.304	0.893
ENSG00000198886	MT-ND4	3	1.84754	1.66e-83	4.34e-79	0.868	0.95
ENSG00000173020	GRK2	3	0.284831	2.24e-78	5.88e-74	0.195	0.729
ENSG00000105401	CDC37	3	0.326728	3.9e-78	1.02e-73	0.221	0.786
ENSG00000139083	ETV6	3	0.866997	1.04e-75	2.72e-71	0.867	0.942
ENSG00000142230	SAE1	3	0.264262	2.59e-75	6.78e-71	0.157	0.637
ENSG00000132153	DHX30	3	0.280034	5.87e-74	1.54e-69	0.16	0.639
ENSG00000172965	MIR4435-2HG	3	0.252077	7.08e-72	1.86e-67	0.209	0.733
ENSG00000212907	MT-ND4L	3	2.17232	1.32e-71	3.46e-67	0.687	0.862
ENSG00000176978	DPP7	3	0.321243	3.86e-71	1.01e-66	0.212	0.742
ENSG00000108848	LUC7L3	3	1.31985	6.63e-71	1.74e-66	0.704	0.891
ENSG00000087087	SRRT	3	0.277645	3.09e-70	8.1e-66	0.167	0.639
ENSG00000062194	GPBP1	3	0.284735	1.09e-68	2.87e-64	0.221	0.751
ENSG00000103550	KNOP1	3	0.272649	1.68e-68	4.4e-64	0.151	0.601
ENSG00000140694	PARN	3	0.268022	1.78e-67	4.67e-63	0.177	0.651
ENSG00000011258	MBTD1	3	0.256957	2.66e-66	6.96e-62	0.155	0.597
ENSG00000173230	GOLGB1	3	0.292187	2.78e-66	7.29e-62	0.207	0.711
ENSG00000112739	PRPF4B	3	0.30233	3.17e-66	8.31e-62	0.249	0.81
ENSG00000148843	PDCD11	3	0.270842	3.24e-66	8.5e-62	0.186	0.668
ENSG00000102974	CTCF	3	0.265876	3.3e-66	8.65e-62	0.216	0.728
ENSG00000109111	SUPT6H	3	0.285965	3.64e-66	9.53e-62	0.196	0.688
ENSG00000128322	IGLL1	3	-0.298581	9.54e-66	2.5e-61	0.031	0.342
ENSG00000106344	RBM28	3	0.282227	1.73e-65	4.52e-61	0.226	0.752
ENSG00000144028	SNRNP200	3	0.323052	2.22e-65	5.81e-61	0.207	0.71
ENSG00000085511	MAP3K4	3	0.270868	4.02e-65	1.05e-60	0.165	0.616
ENSG00000182973	CNOT10	3	0.275581	1.06e-64	2.78e-60	0.165	0.615
ENSG00000108651	UTP6	3	0.26928	1.17e-64	3.08e-60	0.182	0.651
ENSG00000139668	WDFY2	3	0.251716	3.58e-64	9.38e-60	0.204	0.693
ENSG00000149091	DGKZ	3	0.314129	6.86e-64	1.8e-59	0.161	0.605
ENSG00000136143	SUCLA2	3	0.260293	1.02e-63	2.68e-59	0.211	0.708
ENSG00000167766	ZNF83	3	0.268922	1.56e-63	4.09e-59	0.185	0.65
ENSG00000074696	HACD3	3	0.279054	4.28e-63	1.12e-58	0.229	0.748
ENSG00000132570	PCBD2	3	0.260019	4.41e-63	1.16e-58	0.157	0.592
ENSG00000153774	CFDP1	3	0.363737	6.47e-63	1.7e-58	0.219	0.728
ENSG00000174437	ATP2A2	3	0.282334	1.47e-62	3.84e-58	0.181	0.642
ENSG00000126216	TUBGCP3	3	0.266067	1.54e-62	4.03e-58	0.19	0.658
ENSG00000189091	SF3B3	3	0.304382	1.72e-62	4.52e-58	0.203	0.691
ENSG00000223609	HBD	3	-0.403215	1.77e-62	4.64e-58	0.004	0.278
ENSG00000145725	PPIP5K2	3	0.295339	2.31e-62	6.04e-58	0.222	0.73
ENSG00000130402	ACTN4	3	0.309001	2.47e-62	6.48e-58	0.243	0.774
ENSG00000135945	REV1	3	0.277037	4.35e-62	1.14e-57	0.18	0.637
ENSG00000159023	EPB41	3	0.279929	4.43e-62	1.16e-57	0.223	0.727
ENSG00000166439	RNF169	3	0.25196	4.73e-62	1.24e-57	0.158	0.591
ENSG00000038219	BOD1L1	3	0.288507	8.57e-62	2.24e-57	0.238	0.761
ENSG00000119408	NEK6	3	0.294447	9.97e-62	2.61e-57	0.151	0.574
ENSG00000100813	ACIN1	3	0.368722	2.33e-61	6.1e-57	0.223	0.732
ENSG00000116731	PRDM2	3	0.265159	2.53e-61	6.63e-57	0.172	0.616
ENSG00000100412	ACO2	3	0.301724	3.76e-61	9.85e-57	0.15	0.57
ENSG00000276368	HIST1H2AJ	3	-0.25055	4.55e-61	1.19e-56	0.011	0.288
ENSG00000024048	UBR2	3	0.257231	4.7e-61	1.23e-56	0.186	0.645
ENSG00000025800	KPNA6	3	0.25451	5.83e-61	1.53e-56	0.155	0.579
ENSG00000131626	PPFIA1	3	0.26007	6.45e-61	1.69e-56	0.155	0.578
ENSG00000130119	GNL3L	3	0.284245	7.07e-61	1.85e-56	0.185	0.643
ENSG00000137497	NUMA1	3	0.270334	8.01e-61	2.1e-56	0.151	0.572
ENSG00000140632	GLYR1	3	0.275146	1.27e-60	3.33e-56	0.203	0.682
ENSG00000143442	POGZ	3	0.266414	1.57e-60	4.11e-56	0.167	0.604
ENSG00000162852	CNST	3	0.295617	1.71e-60	4.48e-56	0.219	0.715
ENSG00000088882	CPXM1	3	0.293359	2.15e-60	5.62e-56	0.122	0.511
ENSG00000198408	OGA	3	0.263142	2.41e-60	6.31e-56	0.18	0.629
ENSG00000203791	EEF1AKMT2	3	0.259412	3.06e-60	8.02e-56	0.177	0.625
ENSG00000078070	MCCC1	3	0.297836	4.84e-60	1.27e-55	0.163	0.595
ENSG00000198231	DDX42	3	0.337914	6.59e-60	1.73e-55	0.216	0.709
ENSG00000114374	USP9Y	3	0.273024	6.7e-60	1.75e-55	0.163	0.592
ENSG00000115677	HDLBP	3	0.306216	9.01e-60	2.36e-55	0.229	0.737
ENSG00000100815	TRIP11	3	0.28014	1.45e-59	3.81e-55	0.146	0.556
ENSG00000115020	PIKFYVE	3	0.289873	1.86e-59	4.88e-55	0.168	0.601
ENSG00000134744	TUT4	3	0.268171	2.04e-59	5.34e-55	0.242	0.757
ENSG00000157216	SSBP3	3	0.262159	2.13e-59	5.59e-55	0.19	0.644
ENSG00000104852	SNRNP70	3	0.315025	4.33e-59	1.13e-54	0.261	0.808
ENSG00000139436	GIT2	3	0.260843	5.1e-59	1.34e-54	0.198	0.662
ENSG00000128973	CLN6	3	0.259796	8.42e-59	2.2e-54	0.157	0.576
ENSG00000003436	TFPI	3	0.253792	1.11e-58	2.9e-54	0.157	0.572
ENSG00000184863	RBM33	3	0.258349	3.99e-58	1.04e-53	0.207	0.679
ENSG00000007168	PAFAH1B1	3	0.271126	4.69e-58	1.23e-53	0.263	0.802
ENSG00000125107	CNOT1	3	0.262892	5.92e-58	1.55e-53	0.229	0.729
ENSG00000182903	ZNF721	3	0.295678	6.09e-58	1.6e-53	0.19	0.64
ENSG00000160551	TAOK1	3	0.256499	6.39e-58	1.67e-53	0.203	0.67
ENSG00000067955	CBFB	3	0.262999	7.81e-58	2.04e-53	0.2	0.661
ENSG00000173950	XXYLT1	3	0.331067	9.43e-58	2.47e-53	0.185	0.628
ENSG00000090863	GLG1	3	0.272497	9.85e-58	2.58e-53	0.182	0.624
ENSG00000170871	KIAA0232	3	0.251833	1.19e-57	3.12e-53	0.142	0.539
ENSG00000186314	PRELID2	3	0.263711	1.21e-57	3.18e-53	0.19	0.634
ENSG00000132330	SCLY	3	0.270831	1.22e-57	3.2e-53	0.137	0.53
ENSG00000150867	PIP4K2A	3	0.254289	1.23e-57	3.22e-53	0.247	0.76
ENSG00000185344	ATP6V0A2	3	0.261143	1.39e-57	3.63e-53	0.239	0.742
ENSG00000145241	CENPC	3	0.343913	1.58e-57	4.15e-53	0.228	0.725
ENSG00000176783	RUFY1	3	0.291549	3.19e-57	8.37e-53	0.173	0.605
ENSG00000078747	ITCH	3	0.264204	3.35e-57	8.77e-53	0.224	0.712
ENSG00000136448	NMT1	3	0.365486	3.67e-57	9.61e-53	0.216	0.699
ENSG00000273749	CYFIP1	3	0.276867	3.93e-57	1.03e-52	0.157	0.57
ENSG00000081913	PHLPP1	3	0.265236	6.57e-57	1.72e-52	0.178	0.609
ENSG00000265491	RNF115	3	0.308484	7.58e-57	1.99e-52	0.244	0.758
ENSG00000105939	ZC3HAV1	3	0.390307	9.01e-57	2.36e-52	0.211	0.679
ENSG00000107758	PPP3CB	3	0.313671	1.04e-56	2.72e-52	0.17	0.594
ENSG00000166233	ARIH1	3	0.299384	1.07e-56	2.79e-52	0.228	0.719
ENSG00000112249	ASCC3	3	0.26416	1.08e-56	2.84e-52	0.258	0.773
ENSG00000169057	MECP2	3	0.278761	1.44e-56	3.78e-52	0.181	0.615
ENSG00000100991	TRPC4AP	3	0.324639	1.7e-56	4.46e-52	0.213	0.687
ENSG00000179889	PDXDC1	3	0.349371	1.74e-56	4.57e-52	0.2	0.658
ENSG00000119596	YLPM1	3	0.286695	1.88e-56	4.93e-52	0.226	0.717
ENSG00000119522	DENND1A	3	0.277099	4.73e-56	1.24e-51	0.197	0.644
ENSG00000164548	TRA2A	3	0.275853	5.02e-56	1.32e-51	0.221	0.702
ENSG00000109046	WSB1	3	0.327768	5.54e-56	1.45e-51	0.219	0.697
ENSG00000145495	2024-03-06	3	0.28864	5.87e-56	1.54e-51	0.229	0.72
ENSG00000132155	RAF1	3	0.275881	1.03e-55	2.69e-51	0.175	0.602
ENSG00000110422	HIPK3	3	0.290358	1.27e-55	3.33e-51	0.163	0.575
ENSG00000066651	TRMT11	3	0.261181	1.72e-55	4.5e-51	0.158	0.566
ENSG00000167258	CDK12	3	0.347878	1.77e-55	4.64e-51	0.207	0.671
ENSG00000071655	MBD3	3	0.261715	1.84e-55	4.82e-51	0.14	0.527
ENSG00000275835	TUBGCP5	3	0.276443	1.98e-55	5.18e-51	0.145	0.536
ENSG00000070785	EIF2B3	3	0.28475	3.21e-55	8.4e-51	0.212	0.678
ENSG00000075539	FRYL	3	0.282114	3.7e-55	9.69e-51	0.239	0.733
ENSG00000173193	PARP14	3	0.352143	3.76e-55	9.85e-51	0.213	0.68
ENSG00000119778	ATAD2B	3	0.283781	4.39e-55	1.15e-50	0.203	0.657
ENSG00000136643	RPS6KC1	3	0.251744	4.66e-55	1.22e-50	0.231	0.71
ENSG00000165632	TAF3	3	0.290801	5.13e-55	1.34e-50	0.17	0.587
ENSG00000132394	EEFSEC	3	0.274897	7.49e-55	1.96e-50	0.17	0.585
ENSG00000072501	SMC1A	3	0.284855	1.16e-54	3.04e-50	0.244	0.747
ENSG00000103194	USP10	3	0.253966	1.22e-54	3.2e-50	0.244	0.748
ENSG00000108883	EFTUD2	3	0.326189	1.42e-54	3.71e-50	0.214	0.683
ENSG00000141510	TP53	3	0.314371	1.55e-54	4.06e-50	0.192	0.633
ENSG00000120899	PTK2B	3	0.266809	1.98e-54	5.17e-50	0.182	0.607
ENSG00000138031	ADCY3	3	0.28599	2e-54	5.25e-50	0.158	0.561
ENSG00000067369	TP53BP1	3	0.277401	2.07e-54	5.43e-50	0.157	0.557
ENSG00000153944	MSI2	3	0.962885	2.21e-54	5.78e-50	0.762	0.906
ENSG00000157837	SPPL3	3	0.273915	3.79e-54	9.93e-50	0.201	0.646
ENSG00000164134	NAA15	3	0.304854	4.7e-54	1.23e-49	0.239	0.735
ENSG00000197961	ZNF121	3	0.268521	5.19e-54	1.36e-49	0.126	0.493
ENSG00000175216	CKAP5	3	0.27777	6.09e-54	1.59e-49	0.195	0.634
ENSG00000146872	TLK2	3	0.322687	8.88e-54	2.33e-49	0.188	0.621
ENSG00000107341	UBE2R2	3	0.363722	1.07e-53	2.79e-49	0.246	0.752
ENSG00000100345	MYH9	3	0.299197	1.33e-53	3.49e-49	0.277	0.806
ENSG00000061987	MON2	3	0.286152	1.4e-53	3.66e-49	0.233	0.716
ENSG00000135837	CEP350	3	0.295044	1.58e-53	4.15e-49	0.249	0.754
ENSG00000072364	AFF4	3	0.30388	1.73e-53	4.54e-49	0.188	0.62
ENSG00000171492	LRRC8D	3	0.252456	2.12e-53	5.55e-49	0.197	0.633
ENSG00000086102	NFX1	3	0.291185	2.13e-53	5.57e-49	0.233	0.718
ENSG00000111877	MCM9	3	0.312476	2.86e-53	7.5e-49	0.178	0.596
ENSG00000036549	AC118549.1	3	0.331485	3.07e-53	8.03e-49	0.238	0.727
ENSG00000085832	EPS15	3	0.305844	3.1e-53	8.12e-49	0.249	0.749
ENSG00000161813	LARP4	3	0.285275	3.16e-53	8.28e-49	0.216	0.678
ENSG00000163349	HIPK1	3	0.253356	5.06e-53	1.33e-48	0.137	0.511
ENSG00000008294	SPAG9	3	0.367079	5.83e-53	1.53e-48	0.227	0.705
ENSG00000100599	RIN3	3	0.291148	6.33e-53	1.66e-48	0.186	0.611
ENSG00000135999	EPC2	3	0.288063	1.3e-52	3.42e-48	0.181	0.6
ENSG00000176155	CCDC57	3	0.339625	2.12e-52	5.56e-48	0.247	0.748
ENSG00000186998	EMID1	3	0.397937	2.75e-52	7.19e-48	0.193	0.627
ENSG00000047056	WDR37	3	0.290977	3.66e-52	9.6e-48	0.153	0.54
ENSG00000156030	ELMSAN1	3	0.320334	4.05e-52	1.06e-47	0.166	0.566
ENSG00000071564	TCF3	3	0.312194	4.52e-52	1.18e-47	0.141	0.515
ENSG00000132478	UNK	3	0.262867	4.66e-52	1.22e-47	0.138	0.51
ENSG00000119906	SLF2	3	0.304376	5.48e-52	1.43e-47	0.155	0.543
ENSG00000182541	LIMK2	3	0.25381	5.98e-52	1.57e-47	0.142	0.517
ENSG00000146263	MMS22L	3	0.283824	7.48e-52	1.96e-47	0.216	0.667
ENSG00000123607	TTC21B	3	0.294563	7.66e-52	2.01e-47	0.135	0.501
ENSG00000013810	TACC3	3	0.308579	9.38e-52	2.46e-47	0.203	0.644
ENSG00000146918	NCAPG2	3	0.253847	1.03e-51	2.7e-47	0.178	0.59
ENSG00000118058	KMT2A	3	0.345951	1.03e-51	2.7e-47	0.259	0.771
ENSG00000138101	DTNB	3	0.29962	1.34e-51	3.52e-47	0.202	0.639
ENSG00000213079	SCAF8	3	0.296766	1.39e-51	3.65e-47	0.207	0.651
ENSG00000155506	LARP1	3	0.250819	1.55e-51	4.05e-47	0.274	0.804
ENSG00000029725	RABEP1	3	0.291504	2.19e-51	5.75e-47	0.262	0.774
ENSG00000198554	WDHD1	3	0.349738	2.2e-51	5.76e-47	0.206	0.65
ENSG00000123908	AGO2	3	0.308716	2.21e-51	5.8e-47	0.203	0.643
ENSG00000102699	PARP4	3	0.290103	2.32e-51	6.08e-47	0.242	0.725
ENSG00000141279	NPEPPS	3	0.359069	3.03e-51	7.94e-47	0.213	0.665
ENSG00000007202	KIAA0100	3	0.359747	3.1e-51	8.13e-47	0.166	0.563
ENSG00000134324	LPIN1	3	0.330732	3.39e-51	8.87e-47	0.217	0.671
ENSG00000099810	MTAP	3	0.306336	3.64e-51	9.53e-47	0.248	0.732
ENSG00000104447	TRPS1	3	0.278698	3.66e-51	9.59e-47	0.209	0.645
ENSG00000163125	RPRD2	3	0.346258	3.77e-51	9.88e-47	0.198	0.632
ENSG00000047849	MAP4	3	0.349384	3.83e-51	1e-46	0.234	0.708
ENSG00000147251	DOCK11	3	0.371595	3.98e-51	1.04e-46	0.214	0.664
ENSG00000163781	TOPBP1	3	0.415491	4.25e-51	1.11e-46	0.242	0.731
ENSG00000132964	CDK8	3	0.260929	4.33e-51	1.13e-46	0.156	0.541
ENSG00000176225	RTTN	3	0.271119	4.65e-51	1.22e-46	0.181	0.593
ENSG00000048649	RSF1	3	0.263898	5.42e-51	1.42e-46	0.267	0.78
ENSG00000049167	ERCC8	3	0.34495	5.54e-51	1.45e-46	0.163	0.557
ENSG00000115756	HPCAL1	3	0.267237	6.25e-51	1.64e-46	0.156	0.541
ENSG00000140199	SLC12A6	3	0.271373	6.31e-51	1.65e-46	0.195	0.617
ENSG00000100034	PPM1F	3	0.277787	6.92e-51	1.81e-46	0.145	0.517
ENSG00000068028	RASSF1	3	0.288001	8.71e-51	2.28e-46	0.135	0.497
ENSG00000111880	RNGTT	3	0.292715	9.7e-51	2.54e-46	0.229	0.692
ENSG00000147854	UHRF2	3	0.287225	1.01e-50	2.64e-46	0.16	0.548
ENSG00000163214	DHX57	3	0.272963	1.65e-50	4.32e-46	0.126	0.478
ENSG00000122483	CCDC18	3	0.282508	1.69e-50	4.43e-46	0.209	0.65
ENSG00000176095	IP6K1	3	0.326936	1.85e-50	4.84e-46	0.192	0.614
ENSG00000067066	SP100	3	0.289035	1.86e-50	4.87e-46	0.279	0.8
ENSG00000099991	CABIN1	3	0.341864	2.47e-50	6.46e-46	0.183	0.597
ENSG00000182944	EWSR1	3	0.321939	2.77e-50	7.25e-46	0.256	0.759
ENSG00000168924	LETM1	3	0.252161	2.91e-50	7.61e-46	0.105	0.435
ENSG00000014138	POLA2	3	0.276887	3.42e-50	8.95e-46	0.148	0.522
ENSG00000102910	LONP2	3	0.313819	4.11e-50	1.08e-45	0.2	0.631
ENSG00000138095	LRPPRC	3	0.270325	4.46e-50	1.17e-45	0.287	0.822
ENSG00000124942	AHNAK	3	0.330024	4.91e-50	1.29e-45	0.177	0.579
ENSG00000151413	NUBPL	3	0.325727	5.3e-50	1.39e-45	0.201	0.63
ENSG00000198521	ZNF43	3	0.389137	5.64e-50	1.48e-45	0.222	0.678
ENSG00000091127	PUS7	3	0.277152	5.73e-50	1.5e-45	0.206	0.64
ENSG00000174373	RALGAPA1	3	0.346429	5.89e-50	1.54e-45	0.195	0.618
ENSG00000166986	MARS	3	0.323486	8.57e-50	2.24e-45	0.193	0.617
ENSG00000175106	TVP23C	3	0.261161	8.63e-50	2.26e-45	0.155	0.532
ENSG00000106617	PRKAG2	3	0.363589	8.78e-50	2.3e-45	0.173	0.573
ENSG00000152348	ATG10	3	0.308921	9.39e-50	2.46e-45	0.212	0.651
ENSG00000198911	SREBF2	3	0.311269	9.66e-50	2.53e-45	0.204	0.637
ENSG00000072609	CHFR	3	0.332785	1.15e-49	3.01e-45	0.147	0.518
ENSG00000032389	EIPR1	3	0.296663	1.23e-49	3.22e-45	0.162	0.548
ENSG00000100997	ABHD12	3	0.254098	1.66e-49	4.35e-45	0.122	0.465
ENSG00000143190	POU2F1	3	0.301665	1.84e-49	4.83e-45	0.208	0.64
ENSG00000135317	SNX14	3	0.317654	2.14e-49	5.61e-45	0.218	0.666
ENSG00000115392	FANCL	3	0.330124	2.18e-49	5.7e-45	0.232	0.696
ENSG00000114316	USP4	3	0.338143	2.23e-49	5.85e-45	0.182	0.591
ENSG00000146776	ATXN7L1	3	0.293717	2.75e-49	7.21e-45	0.156	0.533
ENSG00000182606	TRAK1	3	0.321706	2.84e-49	7.43e-45	0.186	0.596
ENSG00000065883	CDK13	3	0.349924	3.11e-49	8.14e-45	0.249	0.732
ENSG00000130254	SAFB2	3	0.385082	3.32e-49	8.69e-45	0.192	0.613
ENSG00000107077	KDM4C	3	0.299736	3.5e-49	9.16e-45	0.202	0.628
ENSG00000102893	PHKB	3	0.283897	4.41e-49	1.16e-44	0.233	0.698
ENSG00000170638	TRABD	3	0.313949	4.58e-49	1.2e-44	0.156	0.534
ENSG00000128487	SPECC1	3	0.256778	5.2e-49	1.36e-44	0.11	0.439
ENSG00000139746	RBM26	3	0.364326	8.73e-49	2.29e-44	0.262	0.756
ENSG00000144283	PKP4	3	0.279564	1.01e-48	2.65e-44	0.252	0.729
ENSG00000196313	POM121	3	0.392823	1.08e-48	2.83e-44	0.228	0.689
ENSG00000128908	INO80	3	0.333123	1.09e-48	2.85e-44	0.211	0.649
ENSG00000196418	ZNF124	3	0.25595	1.15e-48	3e-44	0.152	0.524
ENSG00000198648	STK39	3	0.283445	1.2e-48	3.13e-44	0.207	0.637
ENSG00000162402	USP24	3	0.364996	1.25e-48	3.27e-44	0.202	0.628
ENSG00000015475	BID	3	0.420122	1.28e-48	3.35e-44	0.228	0.692
ENSG00000107290	SETX	3	0.287003	1.39e-48	3.64e-44	0.238	0.705
ENSG00000178974	FBXO34	3	0.263195	1.55e-48	4.07e-44	0.165	0.548
ENSG00000148120	AOPEP	3	0.30449	2.05e-48	5.38e-44	0.221	0.663
ENSG00000156970	BUB1B	3	0.257617	2.49e-48	6.53e-44	0.137	0.489
ENSG00000164074	ABHD18	3	0.340512	2.6e-48	6.82e-44	0.226	0.678
[truncated: 14,760 more rows]
