# Supplementary material for: Fucosylation Enhances CD34⁺ Hematopoietic Stem Cell Homing and Longevity via E-Selectin–Mediated Adhesion and Signaling
Source: Research Square preprint supplement (doi:10.21203/rs.3.rs-7961408/v1), 2025-11-26
Supplement: Supplementary file 2 [file a99264d2f7d98bf5eff66c3d.docx]

**Fucosylation Enhances CD34⁺ Hematopoietic Stem Cell Homing and Longevity via E-Selectin–Mediated Adhesion and Signaling**

Asma S. Al-Amoodi,1, # Arwa A. Alghuneim,1, # Jana S. Malki,1 Shuho Nozue,2 Yanyan Li,1 Jing Kai, Huoming Zhang3, Dalila Bensaddek3, Amal Kamal Abdel-Aziz,1 Satoshi Habuchi,2 and Jasmeen S. Merzaban1*

1Laboratory of Cell Migration and Signaling, Bioscience Program, Biological and Environmental Sciences and Engineering Division, King Abdullah University of Science and Technology (KAUST), Thuwal 23955-6900, Kingdom of Saudi Arabia

2Biological and Environmental Sciences and Engineering Division, King Abdullah University of Science and Technology (KAUST), Thuwal 23955-6900, Kingdom of Saudi Arabia

3 Analytical Chemistry Core Lab – Proteomics Unit.King Abdullah University of Science and Technology (KAUST), Thuwal 23955-6900, Kingdom of Saudi Arabia

#A.S.A. and A.A. contributed equally to this study.

*Correspondence: Jasmeen Merzaban, Laboratory of Cell Migration and Signaling, Bioscience Program, Biological and Environmental Sciences and Engineering Division, King Abdullah University of Science and Technology (KAUST), Thuwal 23955-6900, Kingdom of Saudi Arabia; Tel.: +96628082383; E-mail: [jasmeen.merzaban@kaust.edu.sa](mailto:jasmeen.merzaban@kaust.edu.sa)

**Methods**

***In vivo* transplantation and imaging**

mPB-CD34+ HSCs (untreated, FTVI-treated, and 2FF-treated) were first stained with Xeno Light DiR fluorescent dye (125964, PerkinElmer, USA) at an optimized concentration that has no effect on cell viability (data not shown). Briefly, the cells were incubated with 3.5 μg/mL DiR buffer for 30 min at 37 °C according to the manufacturer’s protocol (XenoLight DiR), centrifuged for 3 min at 350g and 4 °C, and washed twice with PBS. For transplantation, cells (5 × 104) were resuspended in 0.2 mL PBS and injected intravenously into the tail of 8–12-week-old NSG immunodeficient female mice and divided randomly into three groups with body weights of ~ 25 ± 5g [1]. Fluorescence images were acquired using an *in vivo* imaging system (IVIS, Caliper Life Sciences) at excitation and emission wavelengths of 710 nm and 760 nm, respectively, with the following parameters: FOV, 22.2; binning, medium; f, 2; exposure time, 180 s. The fluorescence intensity in regions-of-interest (ROI) was quantified by drawing free hand in the dorsal, ventral, and side regions [2]. Images of whole mice were taken at 2, 6, 16, 24, and 48 h, after which the mice were sacrificed by cervical dislocation and organs (spleen, bone marrow, liver, lung, and skeleton) were collected for *ex vivo* imaging at 48 h.

For the E-selectin blocking experiments, anti-CD62E antibodies (100 μg/mL, clone 9A9) or isotype control antibody were injected 3-4 h before FTVI-treated mPB-CD34+ HSCs injection. Flow cytometry analysis of bone marrow engraftment was performed at the 8- and 12-week time points. The bone marrow was extracted from both tibias and two femurs. After red blood cell lysis, the cells were stained with hCD45 (HI30) and mCD45 (30-F12) extracellular markers, and the percentage of human cells was determined via flow cytometry. *In vivo* BrdU incorporation assays were performed to assess in vivo cell cycling. Briefly, mPB-CD34+ HSCs (untreated and FTVI-treated) were injected intravenously into the tail of 8–12-week-old NSG immunodeficient female mice. After approximately 12 weeks, BrdU (100 μL; BD Pharmingen) was administered intraperitoneally to the mice (50 μg/g body weight, equivalent to 5 μL/g body weight). After 4 h, a second dosage was applied, mice were euthanized by cervical dislocation 1–2 h thereafter, and bone marrow was extracted from two tibias and two femurs. The two injections guaranteed the incorporation of BrdU into the DNA of both slow and rapid turnover cells. Human cells were enriched through magnetic-activated cell sorting (MACS) using mouse lineage cell depletion magnetic beads (Miltenyi Biotec) and an auto-MACS device (Miltenyi, Bergisch Gladbach, Germany). The cells were then stained with hCD45 and hCD34 extracellular markers, fixed with Cytofix/Cytoperm buffer, washed with Perm/Wash buffer (Thermo Scientific), and stained with anti-BrdU. BrdU incorporation was analyzed using flow cytometry as previously described [3].

The NSG mice, purchased from Charles River Laboratories (Calco, Italy), were housed under specific pathogen-free conditions at the Animal Resource Core Laboratory of the King Abdullah University of Science and Technology (KAUST). Mice were provided with drinking water and fed a standardized mouse diet unless they were used for IVIS imaging, where the diet was provided in the form a free diet 7–10 d before cell injection. All materials, including lids, feeders, bottles, bedding, and water were autoclaved before use. All *in vivo* experimental procedures were conducted in accordance with the Guide for the Care and Use of Laboratory Animals (NIH publication no. 85-23, revised 1996), Implementing Regulations of the Law of Ethics of Research on Living Creatures (KSA National Committee of BioEthics, 3rd Edition), and approved by the KAUST Institutional Animal Care and Use Committee (IACUC) (protocol number: 17IACUC20).

**Molecular and cell biology assays**

- **Immunoprecipitation and western blotting:** For immunoprecipitation of E-selectin ligands, the cell lysates from FTVI-treated, 2FF-treated, and untreated cells were precleared through incubation with 30 µL Dynabeads Protein G (Thermofisher Scientific) for 2 h at 4 °C with constant rotation to remove any non-specific binding between the Dynabeads and lysates. The pre-cleared lysates were immunoprecipitated through incubation with CD44-mAb (Hermes-3; Abgent), CD43-mAb (1G10 and L60; BD Biosciences), or PSGL-1-mAb (KPL-1; BD Biosciences) with Protein G beads (Thermo Fisher Scientific) overnight at 4 °C. The supernatant was collected to verify the efficiency of immunoprecipitation while the lysate-antibody-bead complex was washed three times with lysis buffer. The complex was re-suspended in 2× LDS and 10% β-mercaptoethanol (Sigma) and heated for 10 min at 75 °C. The samples were subjected to polyacrylamide gel and transferred to a PVDF membrane (EMD Millipore) at 0.39-A for 1–20 h. The resulting membrane was blocked with Tris-buffered saline–Tween-20 (20 mM Tris, 137 mM NaCl, 0.1% Tween-20, pH 7.6) containing 5% non-fat milk (902887; MP Biomedicals) for 1–2 h at room temperature (RT), incubated with anti E-selectin-Ig [4] (for 4 h at RT, and incubated with secondary goat anti-human IgG–horseradish peroxidase antibody (1:10,000). Detection was performed using a standard chemiluminescence method by incubating the membranes for 1 minute with ECL Prime western Blotting System (Merck) and were imaged using the ChemiDoc MP Imaging System (Bio-Rad). Quantification of the bands was performed via imageJ software.
- **Flow cytometry:** Flow cytometry was performed on a FACSCanto ΙІ platform, analyzeusing FlowJo software (BD Biosciences), and compared to fluorescence minus one (FMO). ~ 10,000-50,000 cells were acquired during the analysis.

To determine sLex expression on the cell surface, untreated, FTVI-treated, and 2FF-treated mPB-CD34+ cells were placed in 96-well-plates and stained with 10 μg/mL anti-sLex antibody for 30 min at 4 °C (PE-HECA-452; BD Biosciences). Following incubation with primary antibodies, cells were suspended in FACS buffer (10 mM EDTA, 5% FBS, and HBSS) and washed twice with FACS buffer (200 μL/well).

For recombinant E-selectin binding, 10 μg/mL recombinant E-selectin human Ig (E-Ig) chimera (R&D Systems) was prepared in buffer (20 mM HEPES, pH 7.5, 2 mM CaCl2, and 5% FBS) and used to stain cells. A PE-conjugated anti-human IgG Fc secondary antibody (1:200 dilution in chimera buffer; BioLegend) was used to detect E-Ig. As a control for E-selectin staining, 20 mM EDTA was added to the chimera buffer.

For signaling proteins, cells were collected and pelleted, resuspended in 50 μL Fixation Medium A (Invitrogen), and incubated for 15 min at RT in the dark. Fixed cells were washed twice in 150 μL DPBS (Gibco). Primary antibodies against phosphorylated proteins were prepared as indicated by the manufacturer in 50 μL Permeabilization Medium B (Invitrogen). All protein-specific antibodies were unconjugated rabbit IgG antibodies (Cell Signaling Technologies) against phosphorylated forms of PI3K, AKT-threonine, AKT-serine, PTEN, NFκB, FOXO, GSK, P38, ERK, Rb, mTOR, and EGFR. Rabbit and mouse isotype antibodies (monoclonal IgG and IgG1, respectively; Cell Signaling Technology) were used as negative controls. Primary antibodies were incubated for 20 min in the dark at RT and washed twice with 150 μL PBS. Secondary anti-rabbit and anti-mouse antibodies (Heavy + Light chains, Alexa FluorTM 488, polyclonal goat IgG; Thermo Fisher Scientific) were prepared according to the manufacturer’s instructions in 50 μL PBS, incubated for 20 min in the dark at RT, and washed twice with 150 μL PBS before analysis in 100 μL PBS.

To assess cell viability, untreated, FTVI-treated, and 2FF-treated mPB-CD34+ cells were stained using an Annexin V-CF Blue 7-AAD Apoptosis Staining/Detection Kit (Abcam). As per the manufacturer’s protocol, cells were collected and washed with 500 μL ice-cold PBS, resuspended in 100 μL 1× binding buffer, stained with 2 μL Annexin and 2 μL 7AAD, and incubated in the dark at RT for 15 min. Then, 200 μL of 1× binding buffer was added directly to the cells before the FACS analysis.

For cell cycle analysis, cells were fixed with 100 μL Fixation Medium A over 15 min in the dark at RT, washed twice with 5% FBS prepared in PBS, and resuspended in 100 μL Permeabilization Medium B. Cells were divided in half for single DAPI staining (Sigma Aldrich) and DAPI-Ki67–anti-Ki67 antibody double staining (Alexa FluorTM 647, mouse IgG1-κ, BioLegend) and incubated for 30 min at RT in the dark with ki67 antibody. Ki67-stained cells were then washed twice in 150 μL PBS and resuspended in 50 μL Permeabilization Medium B followed by DAPI staining over 20 min before the FACS analysis.

- **qRT-PCR:** RNA was isolated from FTVI-treated, 2FF-treated, and untreated mPB-CD34+ HSCs using RNeasy Mini kits with DNase (Qiagen) to remove genomic DNA, and the quality was checked using a bioanalyzer (Agilent 2100). The RNA was reverse transcribed using a SuperScript IV Reverse Transcriptase kit, following the manufacturer’s instructions (Thermo Fisher Scientific), and 200 ng of cDNA was pre-amplified using SsoAdvanced PreAmp Supermix (Bio-Rad) using custom-designed primer assays (final concentration of 50 nM for each primer) over 12 cycles. The primer sequences for the target genes are presented in **Table S1**. The pre-amplified cDNA products were diluted (1:5) with TE buffer. qPCR was performed with pre-amplified cDNA in independent biological triplicates using Fast SYBR Green Master Mix (Applied Biosystems) on a QuantStudio 5 Real-Time PCR System (Applied Biosystems) with the following PCR conditions: 98 °C for 20 s, 40 cycles of 98 °C for 3 s, and 60 °C for 30 s. Reactions were run in technical triplicates for each sample and the quantification cycle (Cq) values were averaged. The specificity of amplification was confirmed by melting curve analysis, and the results were normalized to the expression of *GAPDH* using the 2–ΔΔCt method [5].
- **Transwell migration assay:** mPB-CD34+ HSCs (FTVI-treated, 2FF-treated, and untreated cells) were suspended in Dulbecco’s phosphate-buffered saline (PBS), centrifuged at 300 × *g* for 5 min, resuspended in 0.1 mL RPMI-1640 medium (Gibco-Invitrogen), and loaded into the upper wells of 24-well 5-μm Transwell plates (Corning); 0.65 mL RPMI-1640 containing 10% FBS (Gibco-Invitrogen) and 200 ng/mL stromal cell-derived factor 1α **(**SDF-1α) (PeproTech) was placed in the lower wells; and the plates were incubated for 4 h at 37 °C in 5% CO2. The Transwell inserts were washed and stained with crystal violet (BD Biosciences), and the number of migrating cells was calculated according to the standard protocol [6] The number of cells in the lower chamber was counted using a hemocytometer (0267154, Thermo Fisher Scientific). The proportion (%) of migrated cells was determined by dividing the total number of migrated cells (in the lower chamber and on the membrane) by the number of initially seeded cells (3 × 103) and multiplying by 100. The data were normalized by subtracting the percent migrated cells from the cells treated without SDF-1α. The experiment was performed in triplicate.
- **Colony-forming unit assay:** Briefly, following treatment with either vehicle or 2FF, ~1,500 mPB-CD34+ HSCs were pelleted in 1 mL MethoCult H4433 medium (Stem Cell Technologies), seeded into 35 mm low-adherent culture dishes (Stem Cell Technologies), and incubated at 37 °C in a 5% CO2 humidified chamber for 14‒21 days. The total number of colonies were counted under a brightfield microscope using a 20× objective lens (Nikon ECLIPSE TS100) and visually differentiated as erythroid burst-forming, granulocyte-macrophage colony-forming, and granulocyte-erythroid-megakaryocyte-macrophage colony-forming units.

**Phosphopeptide enrichment and data processing**

Following treatment with FTVI and E-selectin, the cells were washed three times with ice-cold PBS and lysed in 500 µL cell lysis buffer (4% SDS in 100 mM triethylammonium bicarbonate) supplemented with Halt protease and phosphatase inhibitors (Thermo-Fisher Scientific) and benzonase (5 U/mL, Merck Millipore). The lysates were centrifuged at 10 000 × *g* for 10 min at 4 °C to remove cellular debris. The supernatant was transferred to new Eppendorf tubes, and its protein content was measured using a microBCA kit (Thermo Fisher Scientific). The proteins were digested using S-Trap protocol (Protifi, Fairport, NY, USA) [7]. The resultant peptides were desalted using Sep-Pak C18 cartridges (Waters, Milford, MA, USA) and dried in a SpeedVac (Thermo Fisher Scientific). Approximately 5% of the peptides were used for global proteome profiling, and the rest for phosphoproteomics analysis. Phosphopeptide enrichment was performed using titanium dioxide (TiO2) microspheres (GL Science, Shinjuku City, Japan) as described [8]. Briefly, the desalted peptides were solubilized in 500 μL TiO2 binding buffer (50% acetonitrile, 2 M lactic acid) and incubated for 5 min at RT on a Thermomixer (Eppendorf ) with agitation at 1400 rpm. The samples were then centrifuged at 10 000 × *g* for 5 min, after which the supernatant was transferred to 2 mL Eppendorf tubes containing 500 μL pre-washed TiO2 bead slurry in TiO2 binding buffer (~5:1 (*w/w*), TiO2 beads:peptides). Following a 45-min incubation at RT on the Thermomixer with continuous agitation at 1400 rpm, the TiO2 beads with affinity bound phosphopeptides were pelleted via centrifugation at 10 000 × *g* for 5 min, washed once with TiO2 binding buffer and twice with TiO2 washing buffer (50% acetonitrile and 0.1% trifluoroacetic acid). The breads were then resuspended in 100 μL TiO2 washing buffer and transferred to a C8 spin tip. The sample was centrifuged at 1000 × *g* for 3 min or until the complete solution was filtered through. The phosphopeptides were subsequently eluted twice with 100 μL 5% ammonium hydroxide solution, and then with 100 μL 50% ACN and 2.5% ammonium hydroxide. The mixed eluent was acidified with formic acid prior to evaporation in the SpeedVac. The phosphopeptides were ultimately desalted using a C18 spin tip and analyzed using a timsTOF Pro 2 mass spectrometer equipped with a nanoElute 2 liquid chromatography system (Bruker Daltonik GmbH, Bremen, Germany) [9]. MS data were analyzed using MSFragger (version 3.7) against a concatenated target–decoy protein database comprising the UniProt human database (20,385 entries, updated on November 20, 2022), 48 common contaminants, and their corresponding reversed sequences [10-12]. Search parameters were the same as we previously described [9]. Proteins with a fold-change of >1.5 and p-value of <0.05 were defined as differentially expressed proteins (DEPs).

**Table S1. List of primers for human fucosyltransferases.**

| Gene | Primers | Amplicon size |
| --- | --- | --- |
| F-FUT1 | GAGGAGTACGCGGACTTGAG | 99 |
| R-FUT1 | CTCTCTGCGGATCTGTTCCC |  |
| F-FUT2 | CCAGGTGAGAGAAGCCATGC | 123 |
| R-FUT2 | TGAATCTTCGCTAGCCGCTG |  |
| F-FUT3 | GCCGACCGCAAGGTGTAC | 75 |
| R-FUT3 | TGACTTAGGGTTGGACATGATATCC |  |
| F-FUT4 | GATCTGCGCGTGTTGGACTA | 112 |
| R-FUT4 | AGGGCGACTCGAAGTTCATC |  |
| F-FUT5 | TCTAGGTACCAGACGGTGCG | 124 |
| R-FUT5 | TCCCCCGACTAGTGAGACC |  |
| F-FUT6 | ACCGCAAGGTGTATCCACAG | 75 |
| R-FUT6 | GGCACTGGGGTTGTACATGA |  |
| F-FUT7 | CCACCTATGAGGCCTTCGTG | 116 |
| R-FUT7 | GAAGCGTTGGTATCGGCTCT |  |
| F-FUT9 | AGCAAGCTAGGCCACCCTTC | 118 |
| R-FUT9 | TCACGGCGGTAAGTCAGAGT |  |
| F-FUT10 | GCTTACCTCTGCCTCGGAAAG | 115 |
| R-FUT10 | GCAGTGTAGTTGAACAAGGTGAT |  |
| F-FUT11 | CCGGTAGACTCCTACGGGAA | 101 |
| R-FUT11 | GCCAAGAGCTCTGGATCCTCG |  |

**Table S3. Summary of cell, gene, and UMI quantities in Esel- and FTVI**+ **E-selectin-treated mPB-CD34+ cells.**

| **Cells** | **Esel** | **FTVI+** **E-selectin** |
| --- | --- | --- |
| Estimated Number of Cells | 5,266 | 4,500 |
| Fraction Reads in Cells | 94.8% | 88.8% |
| Mean Reads per Cell | 89,679 | 87,258 |
| Total Genes Detected | 28,927 | 27,763 |
| Median Genes per Cell | 6,684 | 4,610 |
| Median UMI Counts per Cell | 29,527 | 15,070 |

**Figure S1. Treatment with 2FF suppressed fucosylation as detected by lectin**. (A) mPB-CD34+ cells were cultured in 400 μM 2FF for 3 and 6 d, incubated with (black line) or without (gray line) biotin-conjugated AAL, incubated with streptavidin-conjugated Alexa Fluor 647, and subjected to flow cytometry analysis. (B) Proteins from mPB-CD34+ cell lysates (untreated, 2FF-treated, and FTVI-treated) were probed with AAL for western blot analysis, which preferentially recognizes core fucose; β-actin was used as a loading control.

**Figure S2.** **Phenotypes of mPB-CD34+ cells following fucosylation-targeting treatment (FTVI or 2FF) in the presence and absence of E-selectin.** (A) Light microscope images of mPB-CD34+ cells at 5 h after treatment. Images show increased clumping following Esel and FTVI+ E-selectin treatment. (B) Giemsa staining at 24 h for cell morphology, nuclear size, and granularity assessment.

**
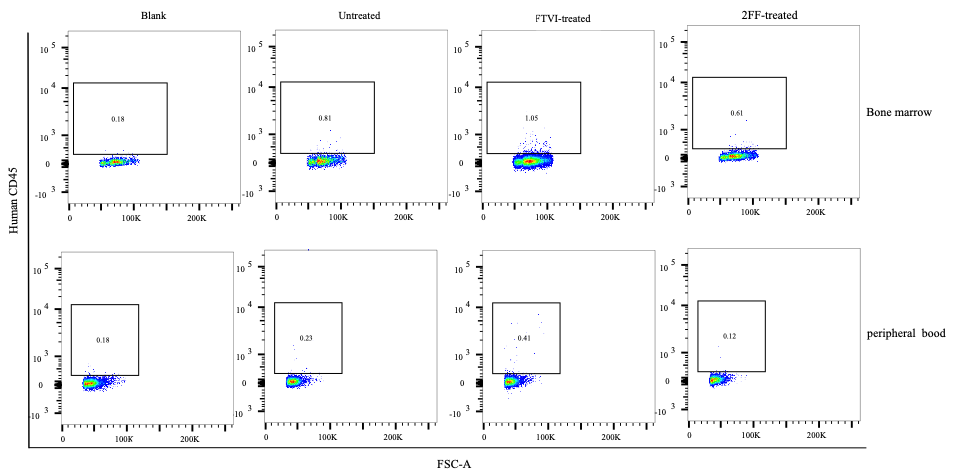
**

**Figure S3.** **Short-term homing assessment of mPB-CD34+ cells.** Flow cytometric analysis was performed to detect the engrafted human mPB-CD34+ cells (untreated, FTVI-treated or 2FF-treated). At 48 h, bone marrow (upper panel) and blood (lower panel) were harvested and stained with anti-human CD45.

**Figure S4. Effect of 2FF, FTVI, Esel, and FTVI+ E-selectin on cell viability and cycling.** (A) Immunofluorescence images taken at 18 h for cells stained with Calcein AM (green fluorescence) and apoptotic cells stained with EthD-1 (red fluorescence). The percentage of live cells was from five different fields ns, 0.12; **P* = 0.033, ***P* = 0.002, ****P* < 0.001, compared to untreated cells (one-way ANOVA) data are presented as the mean ± SD (*n* = 5). (B) FACS analysis of cells stained with Annexin V and 7AAD. The line graphs present the percentages of double-negative viable cells in each treatment at 30 min, 5 h, 24 h, 48 h, and 72 h. E-selectin treatment had a minor effect on cell viability while fucosylation alone did not cause long-term viability loss.

## **Figure S5.** (A) Molecular functions from Gene Ontology enrichment analysis of Esel-treated and FTVI+E-selectin-treated cells.(B) FACS analysis using different antibodies specific to phosphorylated domains. Bar graph shows the percentage of protein phosphorylation at 30 min. (C) Western blot analysis of treated and untreated HSCs. Blot normalization based on total and phosphorylated NFκB at 30 min. Cells treated with FTVI and E-selectin showed activation of the PI3K/AKT/mTOR pathway, as evidenced by a reduction in PTEN phosphorylation. The FOXO/EGFR and NFκB pathways also exhibited phosphorylation and activation. CaCl₂, which is essential for E-selectin binding, did not independently influence phosphorylation. (D) Left panel shows Western blot analysis of treated and untreated HSCs. Right panel shows quantification of p-Rb levels in treated samples normalized to the untreated control. A decrease in p-Rb levels in FTVI+ESEL-treated cells suggests inhibition of cell cycle progression.

**References:**

1. Al-Amoodi AS, Li Y, Al-Ghuneim A, Allehaibi H, Isaioglou I, Esau LE, AbuSamra DB, Merzaban JS: **Refining the migration and engraftment of short-term and long-term HSCs by enhancing homing-specific adhesion mechanisms**. *Blood Adv* 2022, **6**(15):4373-4391.

2. Oliveira FA, Nucci MP, Filgueiras IS, Ferreira JM, Nucci LP, Mamani JB, Alvieri F, Souza LEB, Rego GNA, Kondo AT *et al*: **Noninvasive tracking of hematopoietic stem cells in a bone marrow transplant model**. *Cells* 2020, **9**(4).

3. Barbier V, Nowlan B, Lévesque J-P, Winkler IG: **Flow cytometry analysis of cell cycling and proliferation in mouse hematopoietic stem and progenitor cells**. *Leucocytes: Methods and Protocols* 2012:31-43.

4. Aleisa FA, Sakashita K, Lee JM, AbuSamra DB, Al Alwan B, Nozue S, Tehseen M, Hamdan SM, Habuchi S, Kusakabe T *et al*: **Functional binding of E-selectin to its ligands is enhanced by structural features beyond its lectin domain**. *J Biol Chem* 2020, **295**(11):3719-3733.

5. Livak KJ, Schmittgen TD: **Analysis of relative gene expression data using real-time quantitative PCR and the 2− ΔΔCT method**. *methods* 2001, **25**(4):402-408.

6. Pijuan J, Barceló C, Moreno DF, Maiques O, Sisó P, Marti RM, Macià A, Panosa A: **In vitro cell migration, invasion, and adhesion assays: from cell imaging to data analysis**. *Frontiers in cell and developmental biology* 2019, **7**:107.

7. Zougman A, Selby PJ, Banks RE: **Suspension trapping (STrap) sample preparation method for bottom‐up proteomics analysis**. *Proteomics* 2014, **14**(9):1006-1000.

8. Kettenbach AN, Gerber SA: **Rapid and reproducible single-stage phosphopeptide enrichment of complex peptide mixtures: application to general and phosphotyrosine-specific phosphoproteomics experiments**. *Analytical chemistry* 2011, **83**(20):7635-7644.

9. Zhang H, Bensaddek D: **Optimized Time-Segmented Acquisition Expands Peptide and Protein Identification in TIMS-TOF Pro Mass Spectrometry**. *Journal of Proteome Research* 2025.

10. Kong AT, Leprevost FV, Avtonomov DM, Mellacheruvu D, Nesvizhskii AI: **MSFragger: ultrafast and comprehensive peptide identification in mass spectrometry–based proteomics**. *Nature methods* 2017, **14**(5):513-520.

11. Teo GC, Polasky DA, Yu F, Nesvizhskii AI: **Fast deisotoping algorithm and its implementation in the MSFragger search engine**. *Journal of proteome research* 2020, **20**(1):498-505.

12. Yu F, Haynes SE, Teo GC, Avtonomov DM, Polasky DA, Nesvizhskii AI: **Fast quantitative analysis of timsTOF PASEF data with MSFragger and IonQuant**. *Molecular & Cellular Proteomics* 2020, **19**(9):1575-1585.
