# Supplementary material for: Fucosylation Enhances CD34⁺ Hematopoietic Stem Cell Homing and Longevity via E-Selectin–Mediated Adhesion and Signaling
Source: Research Square preprint supplement (doi:10.21203/rs.3.rs-7961408/v1), 2025-11-26
Supplement: Supplementary file 3 [file fdb466fbe77a851ddc6e640b.xlsx]

## Sheet: Total proteome
Valid	Comparison (group1/group2)	Condition Numerator	Condition Denominator	# of Ratios	Group	AVG Group Quantity Denominator	AVG Group Quantity Numerator	AVG Log2 Ratio	Absolute AVG Log2 Ratio	% Change	Ratio	Pvalue	Qvalue	Degrees Of Freedom	Standard Error	ProteinGroups	ProteinNames	ProteinDescriptions	Genes	UniProtIds	Organisms	Protein Coverage	Molecular Weight	GO Biological Process	GO Molecular Function	GO Cellular Component	Database	OrganismId	Protein Existence	Sequence Version	FASTAName	PTMs	# Unique Total Peptides	# Unique Total EG.Id
TRUE	t4 / t3	t4 (FTVI-ESEL)	t3 (ESEL)	12	Q5T200	198.2654266357422	214.2017059326172	0.1115368464526939	0.1115368464526939	8.037850858462336	1.0803785085846234	0.000115203	0.025954	5.9554524421691895	0.016604534171781263	Q5T200	ZC3HD_HUMAN	Zinc finger CCCH domain-containing protein 13	ZC3H13	Q5T200	Homo sapiens	0.173	196635			nucleoplasm	sp	9606	1	1	UP000005640_9606		37	46
TRUE	t4 / t3	t4	t3	12	P20929	8.267075538635254	3.2155511379241943	-1.36231	1.3623110358768897	-61.1041	0.38895872221037237	0.000281528	0.0316563	4.092240333557129	0.0596315	P20929	NEBU_HUMAN	Nebulin	NEB	P20929	Homo sapiens	0.002	772914		protein binding		sp	9606	1	5	UP000005640_9606		2	2
TRUE	t4 / t3	t4	t3	12	O43766	8.34726	11.60608959197998	0.4755067804691216	0.4755067804691216	39.040654697843195	1.390406546978432	0.000284438	0.0316901	7.695015907287598	0.052563	O43766	LIAS_HUMAN	Lipoyl synthase, mitochondrial	LIAS	O43766	Homo sapiens	0.14	41911.1				sp	9606	1	3	UP000005640_9606		4	5
TRUE	t4 / t3	t4	t3	12	Q9Y4P8	88.00667572021484	100.58442687988281	0.19272208700295598	0.19272208700295598	14.291814861470664	1.1429181486147066	0.000312524	0.033292	4.8164262771606445	0.016959996322702533	Q9Y4P8	WIPI2_HUMAN	WD repeat domain phosphoinositide-interacting protein 2	WIPI2	Q9Y4P8	Homo sapiens	0.156	49408.4		protein binding,phosphatidylinositol-5-phosphate binding,phosphatidylinositol-3-phosphate binding	nucleoplasm,cytosol	sp	9606	1	1	UP000005640_9606		6	7
TRUE	t4 / t3	t4	t3	12	Q04727	229.9836883544922	232.9427032470703	0.018443598506175173	0.018443598506175173	1.2866194614711723	1.0128661946147117	0.000485288	0.0368717	6.154999256134033	0.0206972	Q04727	TLE4_HUMAN	Transducin-like enhancer protein 4	TLE4	Q04727	Homo sapiens	0.147	83755.4		protein binding	nucleoplasm	sp	9606	1	3	UP000005640_9606		12	12
TRUE	t4 / t3	t4	t3	12	P62995	489.23492431640625	385.8724365234375	-0.342403	0.34240340157838706	-21.1274	0.788726	0.000510495	0.0375007	5.549453258514404	0.0338359	P62995	TRA2B_HUMAN	Transformer-2 protein homolog beta	TRA2B	P62995	Homo sapiens	0.326	33665.7			nucleoplasm	sp	9606	1	1	UP000005640_9606		9	15
TRUE	t4 / t3	t4	t3	12	Q96RQ3	182.8990478515625	196.38958740234375	0.10267087520447268	0.10267087520447268	7.375948485926465	1.0737594848592646	0.00051319	0.0375007	7.529407978057861	0.022265915845612074	Q96RQ3	MCCA_HUMAN	Methylcrotonoyl-CoA carboxylase subunit alpha, mitochondrial	MCCC1	Q96RQ3	Homo sapiens	0.348	80473				sp	9606	1	3	UP000005640_9606		18	24
TRUE	t4 / t3	t4	t3	12	O75845	32.21854782104492	32.92884063720703	0.0314602	0.0314602	2.204608414095399	1.022046084140954	0.000634283	0.0391001	6.983061790466309	0.053560093494853585	O75845	SC5D_HUMAN	Lathosterol oxidase	SC5D	O75845	Homo sapiens	0.054	35300.8				sp	9606	1	2	UP000005640_9606		2	3
TRUE	t4 / t3	t4	t3	12	P54619	183.2837371826172	207.35940551757812	0.17805470643140828	0.17805470643140828	13.135736266100274	1.1313573626610027	0.000603277	0.0391001	4.600180149078369	0.022416481956045682	P54619	AAKG1_HUMAN	5'-AMP-activated protein kinase subunit gamma-1	PRKAG1	P54619	Homo sapiens	0.541	37579.4				sp	9606	1	1	UP000005640_9606		18	22
TRUE	t4 / t3	t4	t3	12	Q13442	748.1019897460938	834.5728149414062	0.1578029594969558	0.1578029594969558	11.558694720844255	1.1155869472084425	0.000571464	0.0391001	6.371536731719971	0.034938	Q13442	HAP28_HUMAN	28 kDa heat- and acid-stable phosphoprotein	PDAP1	Q13442	Homo sapiens	0.47	20630				sp	9606	1	1	UP000005640_9606		11	16
TRUE	t4 / t3	t4	t3	12	Q9P0J7	35.769432067871094	66.05108642578125	0.884855	0.884855	84.65791209782674	1.8465791209782674	0.00061023	0.0391001	5.639425754547119	0.14883804691717223	Q9P0J7	KCMF1_HUMAN	E3 ubiquitin-protein ligase KCMF1	KCMF1	Q9P0J7	Homo sapiens	0.123	41945.4				sp	9606	1	2	UP000005640_9606		4	6
TRUE	t4 / t3	t4	t3	12	Q9Y3F4	380.8861389160156	406.263	0.0930557	0.0930557	6.662696860164563	1.0666269686016456	0.000583614	0.0391001	6.130533218383789	0.018884418258334493	Q9Y3F4	STRAP_HUMAN	Serine-threonine kinase receptor-associated protein	STRAP	Q9Y3F4	Homo sapiens	0.517	38438.3			cytosol	sp	9606	1	1	UP000005640_9606		16	26
TRUE	t4 / t3	t4	t3	12	Q7Z7A1	35.60427474975586	38.025962829589844	0.0949343	0.0949343	6.801677879565826	1.0680167787956583	0.000670871	0.0399365	4.864367961883545	0.013567333488353426	Q7Z7A1	CNTRL_HUMAN	Centriolin	CNTRL	Q7Z7A1	Homo sapiens	0.237	268886			centrosome,cytosol,centriolar satellite	sp	9606	1	2	UP000005640_9606		56	59
TRUE	t4 / t3	t4	t3	12	P01860	123.01726531982422	191.17759704589844	0.6360526622334293	0.6360526622334293	55.40712642966725	1.5540712642966725	0.000772104	0.0426201	6.016444206237793	0.141068	P01860	IGHG3_HUMAN	Immunoglobulin heavy constant gamma 3	IGHG3	P01860	Homo sapiens	0.064	41286.9				sp	9606	1	2	UP000005640_9606		5	10
TRUE	t4 / t3	t4	t3	12	O14772	23.154560089111328	27.647024154663086	0.25582785361424487	0.25582785361424487	19.402070470189514	1.1940207047018951	0.000853451	0.0444658	6.825587272644043	0.045814696308890096	O14772	FPGT_HUMAN	Fucose-1-phosphate guanylyltransferase	FPGT	O14772	Homo sapiens	0.133	68009.5				sp	9606	1	3	UP000005640_9606		9	9
TRUE	t4 / t3	t4	t3	12	P61626	2592.863525390625	3038.22	0.22868225674680187	0.22868225674680187	17.176418258160343	1.1717641825816034	0.000899059	0.0454924	5.045285224914551	0.0347714	P61626	LYSC_HUMAN	Lysozyme C	LYZ	P61626	Homo sapiens	0.25	16537				sp	9606	1	1	UP000005640_9606		5	8
TRUE	t4 / t3	t4	t3	12	Q9H869	29.048259735107422	21.6893	-0.421466	0.4214657966624921	-25.3334	0.7466656169601752	0.00093834	0.0467016	6.664865016937256	0.059882840525125915	Q9H869	YYAP1_HUMAN	YY1-associated protein 1	YY1AP1	Q9H869	Homo sapiens	0.053	87944.1		protein binding	fibrillar center	sp	9606	1	2	UP000005640_9606		3	3
TRUE	t4 / t3	t4	t3	12	P62888	3360.758544921875	4354.94	0.3738659275295484	0.3738659275295484	29.582053670192664	1.2958205367019267	0.00106102	0.0482896	6.463932514190674	0.0721088	P62888	RL30_HUMAN	60S ribosomal protein L30	RPL30	P62888	Homo sapiens	0.261	12784				sp	9606	1	2	UP000005640_9606		5	11
TRUE	t4 / t3	t4	t3	12	Q8NBJ7	226.96302795410156	249.00685119628906	0.13372813417271934	0.13372813417271934	9.71252	1.0971251725045077	0.00108488	0.0486154	5.389326572418213	0.028428053367116828	Q8NBJ7	SUMF2_HUMAN	Inactive C-alpha-formylglycine-generating enzyme 2	SUMF2	Q8NBJ7	Homo sapiens	0.379	33843.1				sp	9606	1	2	UP000005640_9606		12	19
TRUE	t4 / t3	t4	t3	12	Q14657	89.74554443359375	59.879798889160156	-0.583771	0.5837709397215253	-33.2782	0.667218	0.00114429	0.0487643	5.579490661621094	0.0747705	Q14657	LAGE3_HUMAN	EKC/KEOPS complex subunit LAGE3	LAGE3	Q14657	Homo sapiens	0.273	14803.7				sp	9606	1	2	UP000005640_9606		3	3
TRUE	t4 / t3	t4	t3	12	Q6PKC3	136.30075073242188	160.543	0.23616597278444415	0.23616597278444415	17.785828682021787	1.1778582868202179	0.00125755	0.0487643	7.438671588897705	0.0453234	Q6PKC3	TXD11_HUMAN	Thioredoxin domain-containing protein 11	TXNDC11	Q6PKC3	Homo sapiens	0.131	110529				sp	9606	1	2	UP000005640_9606		11	11
TRUE	t4 / t3	t4	t3	12	Q96J01	414.169	448.8724670410156	0.11608452272821104	0.11608452272821104	8.378946062278736	1.0837894606227874	0.00120722	0.0487643	6.410945892333984	0.029731	Q96J01	THOC3_HUMAN	THO complex subunit 3	THOC3	Q96J01	Homo sapiens	0.259	38771.7				sp	9606	1	1	UP000005640_9606		9	12
TRUE	t4 / t3	t4	t3	12	Q9P0W8	48.423553466796875	19.367929458618164	-1.32204	1.3220392226349327	-60.0031	0.3999691900326644	0.001254	0.0487643	5.124825954437256	0.11604516857613872	Q9P0W8	SPAT7_HUMAN	Spermatogenesis-associated protein 7	SPATA7	Q9P0W8	Homo sapiens	0.015	67719.1			cytosol	sp	9606	1	3	UP000005640_9606		1	1
TRUE	t4 / t3	t4	t3	12	O15504	26.851911544799805	21.985490798950195	-0.288473	0.28847305573138415	-18.1232	0.8187681820070627	0.00132396	0.0491888	4.517583847045898	0.028690244417490997	O15504	NUP42_HUMAN	Nucleoporin NUP42	NUP42	O15504	Homo sapiens	0.248	44871.6		protein binding	nucleoplasm,cytosol	sp	9606	1	1	UP000005640_9606		10	10
TRUE	t4 / t3	t4	t3	12	O75486	8.646950721740723	18.752	1.1167779361083958	1.1167779361083958	116.86209914321024	2.1686209914321024	0.00131079	0.0491888	5.536543369293213	0.13609009245970005	O75486	SUPT3_HUMAN	Transcription initiation protein SPT3 homolog	SUPT3H	O75486	Homo sapiens	0.073	35792.8			nucleoplasm	sp	9606	1	3	UP000005640_9606		3	3
TRUE	t4 / t3	t4	t3	12	Q92854	60.77448654174805	66.68755340576172	0.13395172172127304	0.13395172172127304	9.729521712950696	1.097295217129507	0.00132096	0.0491888	5.226090908050537	0.028572	Q92854	SEM4D_HUMAN	Semaphorin-4D	SEMA4D	Q92854	Homo sapiens	0.162	96149.9		protein binding,identical protein binding		sp	9606	1	1	UP000005640_9606		12	18
TRUE	t4 / t3	t4	t3	10	A0A0B4J2F0	8.55089	12.30180835723877	0.5247239190001677	0.5247239190001677	43.86582451676051	1.438658245167605	0.001397	0.0501363	4.720867156982422	0.0802612	A0A0B4J2F0	PIOS1_HUMAN	Protein PIGBOS1	PIGBOS1	A0A0B4J2F0	Homo sapiens	0.185	6313.38				sp	9606	1	1	UP000005640_9606		1	1
TRUE	t4 / t3	t4	t3	12	Q9H875	57.00236129760742	63.011802673339844	0.1446004000691627	0.1446004000691627	10.542442872423008	1.10542	0.00139656	0.0501363	6.117528915405273	0.0272415	Q9H875	PKRI1_HUMAN	PRKR-interacting protein 1	PRKRIP1	Q9H875	Homo sapiens	0.304	20997.1				sp	9606	1	1	UP000005640_9606		6	8
TRUE	t4 / t3	t4	t3	12	Q14919	201.19667053222656	248.39541625976562	0.3040321200184323	0.3040321200184323	23.459009337820547	1.2345900933782055	0.00143208	0.0502362	5.621856212615967	0.048367690225197574	Q14919	NC2A_HUMAN	Dr1-associated corepressor	DRAP1	Q14919	Homo sapiens	0.2	22349.8				sp	9606	1	3	UP000005640_9606		6	7
TRUE	t4 / t3	t4	t3	12	Q96EB1	65.61798095703125	68.7505	0.0672792	0.0672792	4.773889971490619	1.0477388997149062	0.00143544	0.0502362	5.858646869659424	0.0326121	Q96EB1	ELP4_HUMAN	Elongator complex protein 4	ELP4	Q96EB1	Homo sapiens	0.351	46587.7			nucleoplasm	sp	9606	1	2	UP000005640_9606		14	17
TRUE	t4 / t3	t4	t3	12	Q96C24	33.444942474365234	36.45427322387695	0.12429987549634604	0.12429987549634604	8.997864929258892	1.089978649292589	0.00144935	0.0503127	5.05081	0.024160108837526513	Q96C24	SYTL4_HUMAN	Synaptotagmin-like protein 4	SYTL4	Q96C24	Homo sapiens	0.306	76023.5				sp	9606	1	2	UP000005640_9606		20	24
TRUE	t4 / t3	t4	t3	12	P43246	482.4685974121094	544.6644287109375	0.1749326055315739	0.1749326055315739	12.891166727210312	1.1289116672721031	0.00145479	0.0503332	5.059789180755615	0.0312568	P43246	MSH2_HUMAN	DNA mismatch repair protein Msh2	MSH2	P43246	Homo sapiens	0.445	104743			nucleoplasm	sp	9606	1	1	UP000005640_9606		37	50
TRUE	t4 / t3	t4	t3	12	Q68CJ9	63.27648162841797	47.633514404296875	-0.409692	0.40969238887667453	-24.7216	0.7527838650071891	0.00150307	0.0505633	6.66998	0.0956018	Q68CJ9	CR3L3_HUMAN	Cyclic AMP-responsive element-binding protein 3-like protein 3	CREB3L3	Q68CJ9	Homo sapiens	0.015	49077.1				sp	9606	1	2	UP000005640_9606		1	1
TRUE	t4 / t3	t4	t3	12	Q9UBT6	22.795183181762695	32.42991256713867	0.5085961314865335	0.5085961314865335	42.26651441469551	1.422665144146955	0.00151818	0.0506115	6.921144008636475	0.0810123	Q9UBT6	POLK_HUMAN	DNA polymerase kappa	POLK	Q9UBT6	Homo sapiens	0.091	98808.6			nucleoplasm,nuclear body	sp	9606	1	1	UP000005640_9606		8	8
TRUE	t4 / t3	t4	t3	12	Q99717	29.951278686523438	37.803619384765625	0.3359067710300839	0.3359067710300839	26.217046625709983	1.2621704662570998	0.00152763	0.0506466	4.14653	0.0378008	Q99717	SMAD5_HUMAN	Mothers against decapentaplegic homolog 5	SMAD5	Q99717	Homo sapiens	0.11	52258.2				sp	9606	1	1	UP000005640_9606		4	4
TRUE	t4 / t3	t4	t3	12	Q15058	48.090755462646484	50.30767059326172	0.0650188	0.0650188	4.609857152976482	1.0460985715297648	0.00169868	0.0509414	7.38481	0.021153252948753927	Q15058	KIF14_HUMAN	Kinesin-like protein KIF14	KIF14	Q15058	Homo sapiens	0.223	186492				sp	9606	1	1	UP000005640_9606		40	44
TRUE	t4 / t3	t4	t3	12	Q6UB28	7.31577	8.588274955749512	0.23135928997642136	0.23135928997642136	17.39405010013182	1.1739405010013182	0.00167851	0.0509414	6.305912017822266	0.0322536	Q6UB28	MAP12_HUMAN	Methionine aminopeptidase 1D, mitochondrial	METAP1D	Q6UB28	Homo sapiens	0.245	37087.9				sp	9606	1	1	UP000005640_9606		6	8
TRUE	t4 / t3	t4	t3	12	Q8NF50	424.64154052734375	449.8372802734375	0.0831577	0.0831577	5.933413795269371	1.0593341379526937	0.00165308	0.0509414	3.841000556945801	0.016720615787640232	Q8NF50	DOCK8_HUMAN	Dedicator of cytokinesis protein 8	DOCK8	Q8NF50	Homo sapiens	0.316	238529		protein binding	cytosol,plasma membrane	sp	9606	1	3	UP000005640_9606		66	80
TRUE	t4 / t3	t4	t3	12	P05023	1025.1866455078125	1100.8629150390625	0.10274823773787518	0.10274823773787518	7.381706527572329	1.0738170652757233	0.00183448	0.0529167	4.323934078216553	0.022732414710204322	P05023	AT1A1_HUMAN	Sodium/potassium-transporting ATPase subunit alpha-1	ATP1A1	P05023	Homo sapiens	0.267	112896				sp	9606	1	1	UP000005640_9606		28	41
TRUE	t4 / t3	t4	t3	12	P51159	379.4120788574219	413.8541259765625	0.1253567319153435	0.1253567319153435	9.07774	1.0907774133677055	0.00184668	0.0531425	6.192717552185059	0.025873270227596046	P51159	RB27A_HUMAN	Ras-related protein Rab-27A	RAB27A	P51159	Homo sapiens	0.412	24868.1		protein binding		sp	9606	1	3	UP000005640_9606		11	15
TRUE	t4 / t3	t4	t3	12	Q9Y2B9	19.774917602539062	12.86508560180664	-0.620211	0.6202106268183301	-34.9424	0.6505759397022614	0.0018906	0.0533939	5.293344497680664	0.10295584656739926	Q9Y2B9	IPKG_HUMAN	cAMP-dependent protein kinase inhibitor gamma	PKIG	Q9Y2B9	Homo sapiens	0.211	7910.46				sp	9606	1	1	UP000005640_9606		1	1
TRUE	t4 / t3	t4	t3	12	P15311	883.4120483398438	944.4573364257812	0.0963991	0.0963991	6.910171555918576	1.0691017155591858	0.00194217	0.0536185	6.735727787017822	0.027846221921799377	P15311	EZRI_HUMAN	Ezrin	EZR	P15311	Homo sapiens	0.398	69412.8				sp	9606	1	4	UP000005640_9606		28	42
TRUE	t4 / t3	t4	t3	12	Q07954	11.595341682434082	13.304709434509277	0.198392	0.198392	14.741848915627354	1.1474184891562735	0.00192495	0.0536185	5.934345245361328	0.036718874022081245	Q07954	LRP1_HUMAN	Prolow-density lipoprotein receptor-related protein 1	LRP1	Q07954	Homo sapiens	0.039	504606		protein binding		sp	9606	1	2	UP000005640_9606		17	19
TRUE	t4 / t3	t4	t3	12	Q7Z4L5	29.970643997192383	31.63065528869629	0.0777734	0.0777734	5.538790863684517	1.0553879086368452	0.00208953	0.0556474	6.251656532287598	0.0189633	Q7Z4L5	TT21B_HUMAN	Tetratricopeptide repeat protein 21B	TTC21B	Q7Z4L5	Homo sapiens	0.128	150937				sp	9606	1	2	UP000005640_9606		19	23
TRUE	t4 / t3	t4	t3	12	Q16643	202.312	213.05059814453125	0.0746159	0.0746159	5.30806	1.0530806027497106	0.00214988	0.0558879	5.604162693023682	0.017409572309865652	Q16643	DREB_HUMAN	Drebrin	DBN1	Q16643	Homo sapiens	0.299	71429.3		protein binding		sp	9606	1	4	UP000005640_9606		22	29
TRUE	t4 / t3	t4	t3	12	Q8N2W9	47.81496047973633	58.399784088134766	0.288501	0.288501	22.137053972645692	1.221370539726457	0.00213448	0.0558879	7.822987079620361	0.0552467	Q8N2W9	PIAS4_HUMAN	E3 SUMO-protein ligase PIAS4	PIAS4	Q8N2W9	Homo sapiens	0.176	56504				sp	9606	1	1	UP000005640_9606		6	6
TRUE	t4 / t3	t4	t3	12	Q96QP1	8.448564529418945	12.824615478515625	0.6021374267515579	0.6021374267515579	51.7964	1.517963842716562	0.00216463	0.0558879	6.606626987457275	0.11469304095912973	Q96QP1	ALPK1_HUMAN	Alpha-protein kinase 1	ALPK1	Q96QP1	Homo sapiens	0.028	138861				sp	9606	1	3	UP000005640_9606		7	7
TRUE	t4 / t3	t4	t3	12	O43852	734.975	799.3595581054688	0.12114873574810762	0.12114873574810762	8.76005	1.0876005120813803	0.00219932	0.0564676	5.262195587158203	0.022971025686162005	O43852	CALU_HUMAN	Calumenin	CALU	O43852	Homo sapiens	0.616	37106.8		protein binding	endoplasmic reticulum	sp	9606	1	2	UP000005640_9606		22	35
TRUE	t4 / t3	t4	t3	12	P08758	1639.817138671875	1939.52	0.24216254386647765	0.24216254386647765	18.276425102777537	1.1827642510277754	0.00225602	0.0571964	5.0975117683410645	0.0441509	P08758	ANXA5_HUMAN	Annexin A5	ANXA5	P08758	Homo sapiens	0.709	35936.8				sp	9606	1	2	UP000005640_9606		22	31
TRUE	t4 / t3	t4	t3	12	P18440	26.2755	22.902576446533203	-0.198209	0.19820900997440838	-12.8368	0.8716319529939744	0.0023072	0.0578898	4.810304641723633	0.0469447	P18440	ARY1_HUMAN	Arylamine N-acetyltransferase 1	NAT1	P18440	Homo sapiens	0.283	33898.7				sp	9606	1	2	UP000005640_9606		10	12
TRUE	t4 / t3	t4	t3	12	O75394	56.79414367675781	69.59434509277344	0.29322791023866157	0.29322791023866157	22.5379	1.225378896262044	0.00233627	0.0580722	6.269550800323486	0.0672478	O75394	RM33_HUMAN	39S ribosomal protein L33, mitochondrial	MRPL33	O75394	Homo sapiens	0.169	7619.17				sp	9606	1	1	UP000005640_9606		1	1
TRUE	t4 / t3	t4	t3	10	P15924	33.451148986816406	22.985958099365234	-0.541303	0.5413029639596423	-31.285	0.6871500320788485	0.00236599	0.0580722	4.318426132202148	0.0566033	P15924	DESP_HUMAN	Desmoplakin	DSP	P15924	Homo sapiens	0.026	331774				sp	9606	1	3	UP000005640_9606		16	16
TRUE	t4 / t3	t4	t3	12	O00754	474.35797119140625	512.6741333007812	0.11206591850469036	0.11206591850469036	8.077478283571239	1.0807747828357124	0.00245034	0.0595141	6.044666767120361	0.027381578044147654	O00754	MA2B1_HUMAN	Lysosomal alpha-mannosidase	MAN2B1	O00754	Homo sapiens	0.351	113744			nucleoplasm,intracellular membrane-bounded organelle	sp	9606	1	3	UP000005640_9606		30	41
TRUE	t4 / t3	t4	t3	12	O15347	2656.312744140625	3102.555908203125	0.2240321939207057	0.2240321939207057	16.799345824276024	1.1679934582427602	0.00249936	0.0595141	7.470309734344482	0.0632855	O15347	HMGB3_HUMAN	High mobility group protein B3	HMGB3	O15347	Homo sapiens	0.325	22980				sp	9606	1	4	UP000005640_9606		8	12
TRUE	t4 / t3	t4	t3	12	P38398	48.791595458984375	61.04887771606445	0.32333211447499116	0.32333211447499116	25.121708240477414	1.2512170824047741	0.00247528	0.0595141	5.42757	0.0423153	P38398	BRCA1_HUMAN	Breast cancer type 1 susceptibility protein	BRCA1	P38398	Homo sapiens	0.13	207721		protein binding	nucleoplasm,nuclear body	sp	9606	1	2	UP000005640_9606		23	25
TRUE	t4 / t3	t4	t3	12	Q9UNN5	338.9307556152344	370.7407531738281	0.12942	0.12942	9.385397173783062	1.0938539717378306	0.00249317	0.0595141	4.524288177490234	0.030509049151312775	Q9UNN5	FAF1_HUMAN	FAS-associated factor 1	FAF1	Q9UNN5	Homo sapiens	0.308	73954.1		protein binding	nucleoplasm	sp	9606	1	2	UP000005640_9606		20	23
TRUE	t4 / t3	t4	t3	12	P10415	44.2103	49.433	0.16109052972185825	0.16109052972185825	11.813201201952639	1.1181320120195264	0.00250783	0.059551	5.285534858703613	0.0502972	P10415	BCL2_HUMAN	Apoptosis regulator Bcl-2	BCL2	P10415	Homo sapiens	0.247	26265.9		protein binding	nuclear membrane	sp	9606	1	2	UP000005640_9606		4	4
TRUE	t4 / t3	t4	t3	12	O43169	1500.610595703125	1728.23	0.20374678647057687	0.20374678647057687	15.168548740169395	1.151685487401694	0.00260395	0.0600074	5.621939182281494	0.038588367950799785	O43169	CYB5B_HUMAN	Cytochrome b5 type B	CYB5B	O43169	Homo sapiens	0.713	16694.5				sp	9606	1	3	UP000005640_9606		10	12
TRUE	t4 / t3	t4	t3	12	O75387	49.87299728393555	55.79902267456055	0.1619809441547621	0.1619809441547621	11.8822	1.118822322967419	0.00264154	0.0600074	5.984190464019775	0.0285283	O75387	LAT3_HUMAN	Large neutral amino acids transporter small subunit 3	SLC43A1	O75387	Homo sapiens	0.186	61476.9				sp	9606	1	1	UP000005640_9606		8	9
TRUE	t4 / t3	t4	t3	12	P99999	377.5092468261719	434.54742431640625	0.2030016514184499	0.2030016514184499	15.109080895308026	1.1510908089530802	0.00256763	0.0600074	4.843175411224365	0.032019	P99999	CYC_HUMAN	Cytochrome c	CYCS	P99999	Homo sapiens	0.619	11748.7				sp	9606	1	2	UP000005640_9606		8	13
TRUE	t4 / t3	t4	t3	12	Q7L211	20.080183029174805	24.25583267211914	0.2725592868903278	0.2725592868903278	20.79487839765939	1.2079487839765939	0.00265231	0.0600074	5.739597320556641	0.0531415	Q7L211	ABHDD_HUMAN	Protein ABHD13	ABHD13	Q7L211	Homo sapiens	0.285	38548.1				sp	9606	2	1	UP000005640_9606		8	8
TRUE	t4 / t3	t4	t3	12	Q8NCW5	239.24398803710938	275.80487060546875	0.20516526282468517	0.20516526282468517	15.281839626702931	1.1528183962670293	0.00257767	0.0600074	3.5159780979156494	0.038022462134792386	Q8NCW5	NNRE_HUMAN	NAD(P)H-hydrate epimerase	NAXE	Q8NCW5	Homo sapiens	0.368	31674.6				sp	9606	1	2	UP000005640_9606		10	13
TRUE	t4 / t3	t4	t3	12	Q9C0D4	21.871381759643555	24.838727951049805	0.18354692384649424	0.18354692384649424	13.567255256279754	1.1356725525627975	0.00263218	0.0600074	5.474465370178223	0.0764182	Q9C0D4	Z518B_HUMAN	Zinc finger protein 518B	ZNF518B	Q9C0D4	Homo sapiens	0.049	119531				sp	9606	1	2	UP000005640_9606		7	7
TRUE	t4 / t3	t4	t3	12	A6NK06	107.80298614501953	244.16	1.1794320917878864	1.1794320917878864	126.4876040281238	2.264876040281238	0.00278144	0.0602101	6.980533123016357	0.1696320580566562	A6NK06	IRG1_HUMAN	Cis-aconitate decarboxylase	ACOD1	A6NK06	Homo sapiens	0.021	52628.3				sp	9606	1	1	UP000005640_9606		1	1
TRUE	t4 / t3	t4	t3	12	O60518	20.383697509765625	23.71552848815918	0.2184162449378871	0.2184162449378871	16.345567220065483	1.1634556722006548	0.00268095	0.0602101	5.226717948913574	0.0503448	O60518	RNBP6_HUMAN	Ran-binding protein 6	RANBP6	O60518	Homo sapiens	0.107	124714				sp	9606	1	2	UP000005640_9606		16	18
TRUE	t4 / t3	t4	t3	12	P17097	26.57103729248047	33.95765686035156	0.35388236423601055	0.35388236423601055	27.79951526379245	1.2779951526379245	0.00275019	0.0602101	6.3226704597473145	0.0509758	P17097	ZNF7_HUMAN	Zinc finger protein 7	ZNF7	P17097	Homo sapiens	0.105	77886.9				sp	9606	1	1	UP000005640_9606		7	8
TRUE	t4 / t3	t4	t3	12	P35613	906.5797119140625	1016.0751342773438	0.1645013059519686	0.1645013059519686	12.077859334851372	1.1207785933485137	0.00275192	0.0602101	5.545804023742676	0.032932233200829907	P35613	BASI_HUMAN	Basigin	BSG	P35613	Homo sapiens	0.304	42200.4	neural retina development,positive regulation of vascular endothelial growth factor production,positive regulation of endothelial cell migration,positive regulation of interleukin-6 production,photoreceptor cell maintenance,positive regulation of viral entry into host cell,viral entry into host cell,endothelial tube morphogenesis,positive regulation of matrix metallopeptidase secretion	virus receptor activity,protein binding,signaling receptor activity	photoreceptor outer segment,photoreceptor inner segment,endosome,endoplasmic reticulum membrane,plasma membrane,intracellular membrane-bounded organelle	sp	9606	1	2	UP000005640_9606		9	15
TRUE	t4 / t3	t4	t3	12	P49588	706.8873291015625	760.4954833984375	0.10545939783668155	0.10545939783668155	7.583691500738832	1.0758369150073883	0.00271994	0.0602101	4.201629161834717	0.0240763	P49588	SYAC_HUMAN	Alanine--tRNA ligase, cytoplasmic	AARS1	P49588	Homo sapiens	0.451	106810			cytosol	sp	9606	1	2	UP000005640_9606		41	64
TRUE	t4 / t3	t4	t3	12	P50148	394.5862121582031	464.026	0.2338662398511952	0.2338662398511952	17.59822134926903	1.1759822134926903	0.0027516	0.0602101	6.6086015701293945	0.050798298331191746	P50148	GNAQ_HUMAN	Guanine nucleotide-binding protein G(q) subunit alpha	GNAQ	P50148	Homo sapiens	0.29	42142.1				sp	9606	1	4	UP000005640_9606		11	14
TRUE	t4 / t3	t4	t3	12	Q9H2K0	45.687782287597656	51.949	0.18528717574779077	0.18528717574779077	13.704328493022079	1.1370432849302208	0.00276701	0.0602101	5.786302089691162	0.0564209	Q9H2K0	IF3M_HUMAN	Translation initiation factor IF-3, mitochondrial	MTIF3	Q9H2K0	Homo sapiens	0.263	31725.4				sp	9606	1	4	UP000005640_9606		6	8
TRUE	t4 / t3	t4	t3	12	Q04864	88.86036682128906	95.57098388671875	0.10503257406113883	0.10503257406113883	7.551867390920974	1.0755186739092097	0.00280638	0.0602132	4.337519645690918	0.018728439343042837	Q04864	REL_HUMAN	Proto-oncogene c-Rel	REL	Q04864	Homo sapiens	0.307	68519.6		protein binding		sp	9606	1	1	UP000005640_9606		17	25
TRUE	t4 / t3	t4	t3	12	Q5T2E6	70.87681579589844	82.82594299316406	0.22476893283913088	0.22476893283913088	16.85900680368475	1.1685900680368475	0.00279895	0.0602132	5.746884346008301	0.036399250132653445	Q5T2E6	ARMD3_HUMAN	Armadillo-like helical domain-containing protein 3	ARMH3	Q5T2E6	Homo sapiens	0.269	78710.5				sp	9606	1	1	UP000005640_9606		19	21
TRUE	t4 / t3	t4	t3	12	O95149	176.56468200683594	201.84121704101562	0.19302401894628785	0.19302401894628785	14.315736729954342	1.1431573672995434	0.0030064	0.0611355	4.4310688972473145	0.0562118	O95149	SPN1_HUMAN	Snurportin-1	SNUPN	O95149	Homo sapiens	0.219	41142.5				sp	9606	1	1	UP000005640_9606		7	7
TRUE	t4 / t3	t4	t3	12	P48681	18.863006591796875	18.65172004699707	-0.016251	0.016250965996481515	-1.12011	0.9887988935501041	0.00302823	0.0611894	6.709660053253174	0.1166042792314262	P48681	NEST_HUMAN	Nestin	NES	P48681	Homo sapiens	0.011	177439				sp	9606	1	2	UP000005640_9606		4	4
TRUE	t4 / t3	t4	t3	12	O14832	33.632266998291016	36.961116790771484	0.136162	0.136162	9.897785934708537	1.0989778593470854	0.00325205	0.0612201	5.2613139152526855	0.0260423	O14832	PAHX_HUMAN	Phytanoyl-CoA dioxygenase, peroxisomal	PHYH	O14832	Homo sapiens	0.254	38538.3				sp	9606	1	1	UP000005640_9606		11	13
TRUE	t4 / t3	t4	t3	12	P02768	9240.49	20809.9	1.171230251017513	1.171230251017513	125.20365637730175	2.2520365637730175	0.00311166	0.0612201	4.852634429931641	0.21911469626575047	P02768	ALBU_HUMAN	Albumin	ALB	P02768	Homo sapiens	0.368	69366.7		protein binding	endoplasmic reticulum,Golgi apparatus	sp	9606	1	2	UP000005640_9606		29	43
TRUE	t4 / t3	t4	t3	12	P06454	16834.9	20452.7	0.28084073457480346	0.28084073457480346	21.490266607467223	1.2149026660746722	0.00305131	0.0612201	4.817095756530762	0.055424229800852945	P06454	PTMA_HUMAN	Prothymosin alpha	PTMA	P06454	Homo sapiens	0.387	12203		protein binding	nucleoplasm,cytosol	sp	9606	1	2	UP000005640_9606		8	13
TRUE	t4 / t3	t4	t3	12	P07195	10232.9	10569.7	0.0467276	0.0467276	3.2919350625764787	1.0329193506257648	0.00319432	0.0612201	5.548243045806885	0.019840705407193782	P07195	LDHB_HUMAN	L-lactate dehydrogenase B chain	LDHB	P07195	Homo sapiens	0.398	36638.5				sp	9606	1	2	UP000005640_9606		19	40
TRUE	t4 / t3	t4	t3	12	Q15424	924.018	959.605	0.054519218871035335	0.054519218871035335	3.851295901635443	1.0385129590163544	0.00319966	0.0612201	6.6887898445129395	0.021507	Q15424	SAFB1_HUMAN	Scaffold attachment factor B1	SAFB	Q15424	Homo sapiens	0.295	102642			nucleoplasm,midbody	sp	9606	1	4	UP000005640_9606		32	48
TRUE	t4 / t3	t4	t3	12	Q6NXT4	18.14667320251465	20.69400405883789	0.18950773186373981	0.18950773186373981	14.037453740943828	1.1403745374094383	0.0030798	0.0612201	5.501954555511475	0.031075	Q6NXT4	ZNT6_HUMAN	Zinc transporter 6	SLC30A6	Q6NXT4	Homo sapiens	0.232	51115.6		protein binding	Golgi apparatus	sp	9606	1	2	UP000005640_9606		10	13
TRUE	t4 / t3	t4	t3	12	Q8N3J3	11.315979957580566	17.196565628051758	0.6037589426191309	0.6037589426191309	51.96709160422108	1.5196709160422108	0.00316797	0.0612201	3.71649	0.060516	Q8N3J3	HROB_HUMAN	Homologous recombination OB-fold protein	HROB	Q8N3J3	Homo sapiens	0.062	69771		protein binding		sp	9606	1	1	UP000005640_9606		3	3
TRUE	t4 / t3	t4	t3	12	Q969H8	686.2991943359375	849.801	0.30828700890301064	0.30828700890301064	23.823660039739146	1.2382366003973915	0.00320899	0.0612201	7.329638481140137	0.0585735	Q969H8	MYDGF_HUMAN	Myeloid-derived growth factor	MYDGF	Q969H8	Homo sapiens	0.37	18795.2				sp	9606	1	1	UP000005640_9606		7	11
TRUE	t4 / t3	t4	t3	12	Q96GQ5	95.20069885253906	113.88277435302734	0.25850547553883113	0.25850547553883113	19.623884830326553	1.1962388483032655	0.00318651	0.0612201	6.959343910217285	0.0689198	Q96GQ5	RUSF1_HUMAN	RUS family member 1	RUSF1	Q96GQ5	Homo sapiens	0.291	51017.8				sp	9606	1	2	UP000005640_9606		16	17
TRUE	t4 / t3	t4	t3	12	Q9BV10	20.926013946533203	30.699430465698242	0.5529143623981471	0.5529143623981471	46.70462585056336	1.4670462585056336	0.00313367	0.0612201	5.754278659820557	0.12449291481668592	Q9BV10	ALG12_HUMAN	Dol-P-Man:Man(7)GlcNAc(2)-PP-Dol alpha-1,6-mannosyltransferase	ALG12	Q9BV10	Homo sapiens	0.055	54654.7				sp	9606	1	1	UP000005640_9606		3	3
TRUE	t4 / t3	t4	t3	12	Q9H0S4	308.9373474121094	351.1571044921875	0.1848023347854806	0.1848023347854806	13.66612273774681	1.136661227377468	0.00319247	0.0612201	5.542076110839844	0.036174912547121386	Q9H0S4	DDX47_HUMAN	Probable ATP-dependent RNA helicase DDX47	DDX47	Q9H0S4	Homo sapiens	0.585	50646.5			nucleolus	sp	9606	1	1	UP000005640_9606		21	31
TRUE	t4 / t3	t4	t3	12	Q9H9H4	26.767108917236328	20.13309097290039	-0.410893	0.41089264176895424	-24.7842	0.7521578454793805	0.00323766	0.0612201	5.607362270355225	0.0740837	Q9H9H4	VP37B_HUMAN	Vacuolar protein sorting-associated protein 37B	VPS37B	Q9H9H4	Homo sapiens	0.316	31307.2				sp	9606	1	1	UP000005640_9606		8	9
TRUE	t4 / t3	t4	t3	12	Q9NQZ5	105.8622817993164	120.14864349365234	0.1826317043296064	0.1826317043296064	13.495233100509441	1.1349523310050944	0.00322357	0.0612201	6.17128	0.03287	Q9NQZ5	STAR7_HUMAN	StAR-related lipid transfer protein 7, mitochondrial	STARD7	Q9NQZ5	Homo sapiens	0.332	43113.2				sp	9606	1	2	UP000005640_9606		13	15
TRUE	t4 / t3	t4	t3	12	Q9Y3D2	70.87198638916016	79.8521	0.1721143880680215	0.1721143880680215	12.670855916135215	1.1267085591613522	0.00310903	0.0612201	5.8113908767700195	0.0511483	Q9Y3D2	MSRB2_HUMAN	Methionine-R-sulfoxide reductase B2, mitochondrial	MSRB2	Q9Y3D2	Homo sapiens	0.192	19536.2				sp	9606	1	2	UP000005640_9606		5	5
TRUE	t4 / t3	t4	t3	12	Q16658	2038.0643310546875	2265.632080078125	0.15271400785413847	0.15271400785413847	11.165876638725747	1.1116587663872575	0.00326624	0.0613064	3.809152364730835	0.029143651676626407	Q16658	FSCN1_HUMAN	Fascin	FSCN1	Q16658	Homo sapiens	0.385	54530				sp	9606	1	3	UP000005640_9606		20	23
TRUE	t4 / t3	t4	t3	12	P22694	451.9807434082031	507.5074768066406	0.16716776874463848	0.16716776874463848	12.285198917930206	1.122851989179302	0.0034287	0.0620403	3.8720529079437256	0.0354268	P22694	KAPCB_HUMAN	cAMP-dependent protein kinase catalytic subunit beta	PRKACB	P22694	Homo sapiens	0.473	40622.7		protein binding		sp	9606	1	2	UP000005640_9606		16	20
TRUE	t4 / t3	t4	t3	12	P81605	29.344133377075195	43.82740020751953	0.5787610008382916	0.5787610008382916	49.356601008906395	1.493566010089064	0.00342422	0.0620403	4.784046649932861	0.13145398197002753	P81605	DCD_HUMAN	Dermcidin	DCD	P81605	Homo sapiens	0.1	11283.9	inorganic anion transport,killing of cells of other organism,defense response to Gram-negative bacterium,defense response to Gram-positive bacterium,defense response to fungus,Requires Ontology,anion transmembrane transport	anion channel activity	extracellular space,membrane,extrinsic component of membrane	sp	9606	1	2	UP000005640_9606		2	2
TRUE	t4 / t3	t4	t3	12	Q7L523	128.9414520263672	146.41029357910156	0.1833008528005515	0.1833008528005515	13.547886485070904	1.135478864850709	0.00343306	0.0620403	5.880452632904053	0.0531471	Q7L523	RRAGA_HUMAN	Ras-related GTP-binding protein A	RRAGA	Q7L523	Homo sapiens	0.243	36566.1				sp	9606	1	1	UP000005640_9606		7	11
TRUE	t4 / t3	t4	t3	12	Q96B26	297.458	331.4818420410156	0.15624264290991008	0.15624264290991008	11.438105974364499	1.114381059743645	0.00338517	0.0620403	7.270064830780029	0.0609706	Q96B26	EXOS8_HUMAN	Exosome complex component RRP43	EXOSC8	Q96B26	Homo sapiens	0.214	30039.6				sp	9606	1	1	UP000005640_9606		5	7
TRUE	t4 / t3	t4	t3	12	Q9Y4X5	969.4586181640625	1040.6881103515625	0.10228654147217475	0.10228654147217475	7.34735	1.0734734735995155	0.00339781	0.0620403	7.378694534301758	0.0286513	Q9Y4X5	ARI1_HUMAN	E3 ubiquitin-protein ligase ARIH1	ARIH1	Q9Y4X5	Homo sapiens	0.151	64117.8				sp	9606	1	2	UP000005640_9606		8	10
TRUE	t4 / t3	t4	t3	12	P59998	2236.063232421875	2647.245849609375	0.243531	0.243531	18.3887	1.183886846859044	0.00356986	0.0628296	4.524783611297607	0.049459261236061314	P59998	ARPC4_HUMAN	Actin-related protein 2/3 complex subunit 4	ARPC4	P59998	Homo sapiens	0.613	19667				sp	9606	1	3	UP000005640_9606		11	17
TRUE	t4 / t3	t4	t3	12	P15531	2429.52	2570.67	0.0814714	0.0814714	5.809666102318967	1.0580966610231897	0.00364575	0.0636203	6.810628414154053	0.030274847632184215	P15531	NDKA_HUMAN	Nucleoside diphosphate kinase A	NME1	P15531	Homo sapiens	0.395	17148.7			cytosol	sp	9606	1	1	UP000005640_9606		6	11
TRUE	t4 / t3	t4	t3	12	P20618	520.7525024414062	591.1437377929688	0.18291110021156928	0.18291110021156928	13.517214995905412	1.1351721499590541	0.00365849	0.0636809	4.898900032043457	0.0417768	P20618	PSB1_HUMAN	Proteasome subunit beta type-1	PSMB1	P20618	Homo sapiens	0.544	26489.4				sp	9606	1	2	UP000005640_9606		11	20
TRUE	t4 / t3	t4	t3	12	Q14344	225.8311004638672	242.44671630859375	0.10242353265041043	0.10242353265041043	7.3575410165372945	1.073575410165373	0.00367266	0.0636809	6.362933158874512	0.025867791114940183	Q14344	GNA13_HUMAN	Guanine nucleotide-binding protein subunit alpha-13	GNA13	Q14344	Homo sapiens	0.549	44049.6			cytosol	sp	9606	1	2	UP000005640_9606		20	26
TRUE	t4 / t3	t4	t3	12	Q8NC54	34.69497299194336	39.58686065673828	0.19029501871327442	0.19029501871327442	14.099701607869486	1.1409970160786949	0.00370079	0.0638386	6.6260247230529785	0.040897648363568885	Q8NC54	KCT2_HUMAN	Keratinocyte-associated transmembrane protein 2	KCT2	Q8NC54	Homo sapiens	0.049	29234.8				sp	9606	1	2	UP000005640_9606		2	3
TRUE	t4 / t3	t4	t3	12	P08397	95.96682739257812	104.468	0.12245025920556374	0.12245025920556374	8.858213067882792	1.088582130678828	0.00373733	0.0639619	6.067243576049805	0.0423918	P08397	HEM3_HUMAN	Porphobilinogen deaminase	HMBS	P08397	Homo sapiens	0.421	39330.1				sp	9606	1	2	UP000005640_9606		14	16
TRUE	t4 / t3	t4	t3	12	Q96MX6	48.28034973144531	53.72532272338867	0.1541661171512362	0.1541661171512362	11.277824254029811	1.1127782425402981	0.00371653	0.0639619	6.754836082458496	0.0392648	Q96MX6	DAA10_HUMAN	Dynein axonemal assembly factor 10	DNAAF10	Q96MX6	Homo sapiens	0.266	39740.4				sp	9606	1	1	UP000005640_9606		11	14
TRUE	t4 / t3	t4	t3	12	P06748	6760.73	7191.08	0.0890303	0.0890303	6.365504711406311	1.0636550471140631	0.00379572	0.0644688	5.505739212036133	0.026866134018070482	P06748	NPM_HUMAN	Nucleophosmin	NPM1	P06748	Homo sapiens	0.459	32575		protein binding	nucleoplasm,nucleolus	sp	9606	1	2	UP000005640_9606		16	33
TRUE	t4 / t3	t4	t3	12	O14681	105.13501739501953	117.74237823486328	0.16339040471781885	0.16339040471781885	11.991590577737421	1.1199159057773742	0.00387018	0.064811	6.508650779724121	0.0460313	O14681	EI24_HUMAN	Etoposide-induced protein 2.4 homolog	EI24	O14681	Homo sapiens	0.159	38964.7			endoplasmic reticulum,Golgi apparatus,cytosol	sp	9606	1	4	UP000005640_9606		6	6
TRUE	t4 / t3	t4	t3	12	P14618	8350.92	8995.87	0.10732703786602717	0.10732703786602717	7.723054092660275	1.0772305409266028	0.00387957	0.064811	4.924501895904541	0.0299315	P14618	KPYM_HUMAN	Pyruvate kinase PKM	PKM	P14618	Homo sapiens	0.691	57936.9	glycolytic process,chromatin remodeling,positive regulation of transcription from RNA polymerase II promoter	histone kinase activity (H3-T11 specific),transcription coactivator activity,protein tyrosine kinase activity,pyruvate kinase activity,protein binding,protein homodimerization activity	nucleus,cytoplasm,cytosol	sp	9606	1	4	UP000005640_9606		40	71
TRUE	t4 / t3	t4	t3	12	Q15046	598.4207153320312	628.6571044921875	0.0711132	0.0711132	5.0527	1.0505269760646232	0.00388825	0.064811	5.128220558166504	0.024472761668431074	Q15046	SYK_HUMAN	Lysine--tRNA ligase	KARS1	Q15046	Homo sapiens	0.429	68048.1		protein binding	cytosol,plasma membrane	sp	9606	1	3	UP000005640_9606		27	41
TRUE	t4 / t3	t4	t3	12	Q6ICB0	7.415074825286865	9.679959297180176	0.3845397302463307	0.3845397302463307	30.544323897711845	1.3054432389771184	0.00391934	0.065042	4.163883209228516	0.0566904	Q6ICB0	DESI1_HUMAN	Desumoylating isopeptidase 1	DESI1	Q6ICB0	Homo sapiens	0.083	18262.7				sp	9606	1	1	UP000005640_9606		3	3
TRUE	t4 / t3	t4	t3	12	Q92994	79.40641021728516	91.53038024902344	0.20499519803095806	0.20499519803095806	15.268251012182322	1.1526825101218232	0.00397079	0.065042	6.325557708740234	0.0470422	Q92994	TF3B_HUMAN	Transcription factor IIIB 90 kDa subunit	BRF1	Q92994	Homo sapiens	0.196	73840.1				sp	9606	1	1	UP000005640_9606		12	14
TRUE	t4 / t3	t4	t3	12	Q99613	2182.55	2513.71	0.2038037739426517	0.2038037739426517	15.173098068957348	1.1517309806895735	0.00392571	0.065042	4.5857319831848145	0.0380225	Q99613	EIF3C_HUMAN	Eukaryotic translation initiation factor 3 subunit C	EIF3C	Q99613	Homo sapiens	0.357	105344				sp	9606	1	1	UP000005640_9606		33	46
TRUE	t4 / t3	t4	t3	12	Q9UJA5	154.091	170.47494506835938	0.14577423000041165	0.14577423000041165	10.632420883518856	1.1063242088351886	0.0039581	0.065042	4.120745658874512	0.0256603	Q9UJA5	TRM6_HUMAN	tRNA (adenine(58)-N(1))-methyltransferase non-catalytic subunit TRM6	TRMT6	Q9UJA5	Homo sapiens	0.445	55799.3				sp	9606	1	1	UP000005640_9606		23	29
TRUE	t4 / t3	t4	t3	12	P27797	19282	21935.7	0.1860216044996589	0.1860216044996589	13.762226374986364	1.1376222637498636	0.00425067	0.0654597	3.7243337631225586	0.0318121	P27797	CALR_HUMAN	Calreticulin	CALR	P27797	Homo sapiens	0.458	48141.6				sp	9606	1	1	UP000005640_9606		28	40
TRUE	t4 / t3	t4	t3	12	Q13011	1183.91	1412.407958984375	0.2546032031368183	0.2546032031368183	19.30075747389919	1.1930075747389919	0.00420431	0.0654597	3.7324295043945312	0.050556836211253134	Q13011	ECH1_HUMAN	Delta(3,5)-Delta(2,4)-dienoyl-CoA isomerase, mitochondrial	ECH1	Q13011	Homo sapiens	0.436	35816.2				sp	9606	1	2	UP000005640_9606		14	24
TRUE	t4 / t3	t4	t3	12	Q16881	322.331	355.27825927734375	0.14040512485892412	0.14040512485892412	10.221458657288785	1.1022145865728878	0.00408952	0.0654597	3.016472578048706	0.018694	Q16881	TRXR1_HUMAN	Thioredoxin reductase 1, cytoplasmic	TXNRD1	Q16881	Homo sapiens	0.387	70906.1		protein binding	fibrillar center,nucleoplasm	sp	9606	1	3	UP000005640_9606		22	35
TRUE	t4 / t3	t4	t3	12	Q8IXX5	8.507009506225586	4.519683837890625	-0.91243	0.9124302098625785	-46.8711	0.531289	0.00407884	0.0654597	6.130668640136719	0.0949301	Q8IXX5	T183A_HUMAN	Transmembrane protein 183A	TMEM183A	Q8IXX5	Homo sapiens	0.029	42826.4				sp	9606	1	2	UP000005640_9606		2	2
TRUE	t4 / t3	t4	t3	12	Q96CW6	53.6963	60.36638259887695	0.16892327166400262	0.16892327166400262	12.421913168487686	1.1242191316848769	0.00421222	0.0654597	5.551696300506592	0.0450274	Q96CW6	S7A6O_HUMAN	Probable RNA polymerase II nuclear localization protein SLC7A6OS	SLC7A6OS	Q96CW6	Homo sapiens	0.078	35027.8				sp	9606	1	2	UP000005640_9606		4	4
TRUE	t4 / t3	t4	t3	12	Q9BUQ8	420.6260986328125	472.23077392578125	0.16695369302872357	0.16695369302872357	12.268538604880352	1.1226853860488035	0.00418288	0.0654597	5.853884220123291	0.044210756855411544	Q9BUQ8	DDX23_HUMAN	Probable ATP-dependent RNA helicase DDX23	DDX23	Q9BUQ8	Homo sapiens	0.409	95582.5			nucleoplasm,nucleolus	sp	9606	1	3	UP000005640_9606		39	48
TRUE	t4 / t3	t4	t3	12	Q9BUT9	30.567768096923828	25.766328811645508	-0.246524	0.24652422126217333	-15.7075	0.8429247673544896	0.00417601	0.0654597	6.7409772872924805	0.0531253	Q9BUT9	MCRI2_HUMAN	MAPK regulated corepressor interacting protein 2	MCRIP2	Q9BUT9	Homo sapiens	0.269	17828				sp	9606	1	2	UP000005640_9606		4	4
TRUE	t4 / t3	t4	t3	12	Q9H853	6233.36	7670.84	0.29937478993294814	0.29937478993294814	23.06109969965351	1.230610996996535	0.00419778	0.0654597	4.7716450691223145	0.0668048	Q9H853	TBA4B_HUMAN	Putative tubulin-like protein alpha-4B	TUBA4B	Q9H853	Homo sapiens	0.05	27551.2				sp	9606	5	2	UP000005640_9606		1	1
TRUE	t4 / t3	t4	t3	12	Q9HCL0	176.0300750732422	213.9472198486328	0.2814329947726265	0.2814329947726265	21.540151454013845	1.2154015145401385	0.00405119	0.0654597	4.8829264640808105	0.0696952	Q9HCL0	PCD18_HUMAN	Protocadherin-18	PCDH18	Q9HCL0	Homo sapiens	0.007	126149				sp	9606	1	3	UP000005640_9606		1	1
TRUE	t4 / t3	t4	t3	12	Q9NS23	36.2965	42.0637	0.2127461346628912	0.2127461346628912	15.889200832083628	1.1588920083208363	0.00414901	0.0654597	6.276390075683594	0.0958632	Q9NS23	RASF1_HUMAN	Ras association domain-containing protein 1	RASSF1	Q9NS23	Homo sapiens	0.125	39219	regulation of cell cycle G1/S phase transition,cellular response to DNA damage stimulus,positive regulation of protein ubiquitination,protein stabilization,regulation of cell cycle	protein binding,identical protein binding	nucleus,microtubule cytoskeleton	sp	9606	1	1	UP000005640_9606		7	7
TRUE	t4 / t3	t4	t3	12	Q9Y3L5	199.727	236.08558654785156	0.24128022229092733	0.24128022229092733	18.204111873870833	1.1820411187387083	0.00409382	0.0654597	6.254182815551758	0.067082	Q9Y3L5	RAP2C_HUMAN	Ras-related protein Rap-2c	RAP2C	Q9Y3L5	Homo sapiens	0.579	20744.8				sp	9606	1	1	UP000005640_9606		9	9
TRUE	t4 / t3	t4	t3	12	Q9Y680	39.25600051879883	43.4297	0.14576837627593528	0.14576837627593528	10.631971994198652	1.1063197199419865	0.00411152	0.0654597	7.21257	0.0479878	Q9Y680	FKBP7_HUMAN	Peptidyl-prolyl cis-trans isomerase FKBP7	FKBP7	Q9Y680	Homo sapiens	0.414	25794.3				sp	9606	1	2	UP000005640_9606		10	11
TRUE	t4 / t3	t4	t3	12	Q8NHS3	16.169179916381836	12.83521842956543	-0.333139	0.3331386608221523	-20.6192	0.7938076325417965	0.0043225	0.0661113	4.723780155181885	0.0546458	Q8NHS3	MFSD8_HUMAN	Major facilitator superfamily domain-containing protein 8	MFSD8	Q8NHS3	Homo sapiens	0.11	57627.6				sp	9606	1	1	UP000005640_9606		5	5
TRUE	t4 / t3	t4	t3	12	O75340	358.3701477050781	417.5768127441406	0.22059113833119562	0.22059113833119562	16.521092903024616	1.1652109290302461	0.00432838	0.0661181	4.531731128692627	0.045261336388355354	O75340	PDCD6_HUMAN	Programmed cell death protein 6	PDCD6	O75340	Homo sapiens	0.476	21868.5			nucleoplasm,cytosol	sp	9606	1	1	UP000005640_9606		10	14
TRUE	t4 / t3	t4	t3	12	Q14573	19.54432487487793	30.004995346069336	0.6184529560234036	0.6184529560234036	53.52280285024038	1.5352280285024038	0.00436579	0.0663557	5.601738452911377	0.1201215997718145	Q14573	ITPR3_HUMAN	Inositol 1,4,5-trisphosphate receptor type 3	ITPR3	Q14573	Homo sapiens	0.029	304106				sp	9606	1	2	UP000005640_9606		6	6
TRUE	t4 / t3	t4	t3	12	P00568	59.750831604003906	64.46054077148438	0.10945749901783555	0.10945749901783555	7.882248733697739	1.0788224873369774	0.00439766	0.066507	3.272501230239868	0.023514483907946568	P00568	KAD1_HUMAN	Adenylate kinase isoenzyme 1	AK1	P00568	Homo sapiens	0.314	21634.8				sp	9606	1	3	UP000005640_9606		11	12
TRUE	t4 / t3	t4	t3	12	Q2LD37	4.147590637207031	5.494032859802246	0.4055920304877934	0.4055920304877934	32.4632	1.324632380668576	0.00439735	0.066507	5.297562599182129	0.058013633225390965	Q2LD37	K1109_HUMAN	Transmembrane protein KIAA1109	KIAA1109	Q2LD37	Homo sapiens	0.011	555482				sp	9606	1	2	UP000005640_9606		7	7
TRUE	t4 / t3	t4	t3	12	P36969	561.57	580.195	0.047072	0.047072	3.316597027461654	1.0331659702746165	0.0044635	0.0665175	5.757358551025391	0.025795832490023488	P36969	GPX4_HUMAN	Phospholipid hydroperoxide glutathione peroxidase	GPX4	P36969	Homo sapiens	0.34	22174.7				sp	9606	1	3	UP000005640_9606		9	14
TRUE	t4 / t3	t4	t3	12	O95376	62.37519073486328	70.78611755371094	0.18249412726591097	0.18249412726591097	13.484410580161232	1.1348441058016123	0.00449923	0.0666325	6.2763237953186035	0.0439642	O95376	ARI2_HUMAN	E3 ubiquitin-protein ligase ARIH2	ARIH2	O95376	Homo sapiens	0.201	57818.9				sp	9606	1	1	UP000005640_9606		9	12
TRUE	t4 / t3	t4	t3	12	Q9BT23	272.1117248535156	322.3297424316406	0.24433819546405314	0.24433819546405314	18.454926043763308	1.184549260437633	0.00451606	0.0668003	6.4568657875061035	0.058946	Q9BT23	LIMD2_HUMAN	LIM domain-containing protein 2	LIMD2	Q9BT23	Homo sapiens	0.205	14070				sp	9606	1	1	UP000005640_9606		3	4
TRUE	t4 / t3	t4	t3	12	Q6W2J9	20.33913230895996	22.703166961669922	0.15863542578365075	0.15863542578365075	11.623085079536732	1.1162308507953673	0.00453233	0.0669594	6.523530960083008	0.0354524	Q6W2J9	BCOR_HUMAN	BCL-6 corepressor	BCOR	Q6W2J9	Homo sapiens	0.141	192189		protein binding	nucleoplasm	sp	9606	1	1	UP000005640_9606		24	26
TRUE	t4 / t3	t4	t3	12	Q15836	286.27081298828125	323.841	0.1779064383724622	0.1779064383724622	13.124109724384203	1.131241097243842	0.00455727	0.067083	6.501073360443115	0.0525894	Q15836	VAMP3_HUMAN	Vesicle-associated membrane protein 3	VAMP3	Q15836	Homo sapiens	0.52	11309.1				sp	9606	1	3	UP000005640_9606		4	6
TRUE	t4 / t3	t4	t3	12	Q8N108	109.52723693847656	123.63693237304688	0.1748200842555595	0.1748200842555595	12.882362258892721	1.1288236225889272	0.00458164	0.0673044	6.313008785247803	0.0502927	Q8N108	MIER1_HUMAN	Mesoderm induction early response protein 1	MIER1	Q8N108	Homo sapiens	0.275	57983.2		protein binding	nucleoplasm	sp	9606	1	2	UP000005640_9606		13	15
TRUE	t4 / t3	t4	t3	12	Q9H0U4	960.5623779296875	1161.75	0.2743454038630627	0.2743454038630627	20.944520135972788	1.2094452013597279	0.00478809	0.0688609	5.681018829345703	0.0671273	Q9H0U4	RAB1B_HUMAN	Ras-related protein Rab-1B	RAB1B	Q9H0U4	Homo sapiens	0.557	22171.2				sp	9606	1	1	UP000005640_9606		12	19
TRUE	t4 / t3	t4	t3	12	Q9NQR1	7.894352912902832	14.42409896850586	0.8695882800141421	0.8695882800141421	82.71413917827972	1.8271413917827972	0.0048028	0.0688609	4.901679992675781	0.11807282221653101	Q9NQR1	KMT5A_HUMAN	N-lysine methyltransferase KMT5A	KMT5A	Q9NQR1	Homo sapiens	0.109	42889.8			nucleoplasm,cytosol	sp	9606	1	3	UP000005640_9606		4	4
TRUE	t4 / t3	t4	t3	12	Q4KWH8	1238.0076904296875	1662.95	0.42572637905810257	0.42572637905810257	34.324864158180056	1.3432486415818006	0.00482646	0.0689806	5.204921245574951	0.0963307	Q4KWH8	PLCH1_HUMAN	1-phosphatidylinositol 4,5-bisphosphate phosphodiesterase eta-1	PLCH1	Q4KWH8	Homo sapiens	0.023	189223			intracellular membrane-bounded organelle	sp	9606	1	1	UP000005640_9606		5	5
TRUE	t4 / t3	t4	t3	12	Q5H9U9	13.049822807312012	14.968510627746582	0.1979004620836254	0.1979004620836254	14.702788296554491	1.147027882965545	0.00484484	0.0689806	4.683699607849121	0.0356986	Q5H9U9	DDX6L_HUMAN	Probable ATP-dependent RNA helicase DDX60-like	DDX60L	Q5H9U9	Homo sapiens	0.12	197674				sp	9606	2	2	UP000005640_9606		23	23
TRUE	t4 / t3	t4	t3	12	Q9UBV2	320.8509216308594	344.8064270019531	0.10388353840760428	0.10388353840760428	7.466241720400824	1.0746624172040082	0.00481746	0.0689806	6.810244083404541	0.026696452149454063	Q9UBV2	SE1L1_HUMAN	Protein sel-1 homolog 1	SEL1L	Q9UBV2	Homo sapiens	0.286	88754.7				sp	9606	1	3	UP000005640_9606		19	28
TRUE	t4 / t3	t4	t3	12	P30679	156.82839965820312	184.89370727539062	0.23750928738090116	0.23750928738090116	17.89555187603389	1.1789555187603389	0.00486538	0.0690248	4.663824558258057	0.0436786	P30679	GNA15_HUMAN	Guanine nucleotide-binding protein subunit alpha-15	GNA15	P30679	Homo sapiens	0.289	43568				sp	9606	1	2	UP000005640_9606		10	14
TRUE	t4 / t3	t4	t3	12	Q9UP52	43.27057647705078	50.5819	0.22523547662531498	0.22523547662531498	16.89680319051492	1.1689680319051492	0.00486138	0.0690248	4.5427775382995605	0.0348185	Q9UP52	TFR2_HUMAN	Transferrin receptor protein 2	TFR2	Q9UP52	Homo sapiens	0.174	88755.1				sp	9606	1	1	UP000005640_9606		15	16
TRUE	t4 / t3	t4	t3	12	Q8TCJ2	837.5482788085938	950.3799438476562	0.1823320366871643	0.1823320366871643	13.471661024671278	1.1347166102467128	0.00487716	0.0691112	7.4126811027526855	0.058654277808742765	Q8TCJ2	STT3B_HUMAN	Dolichyl-diphosphooligosaccharide--protein glycosyltransferase subunit STT3B	STT3B	Q8TCJ2	Homo sapiens	0.224	93674.3				sp	9606	1	1	UP000005640_9606		18	26
TRUE	t4 / t3	t4	t3	12	P62891;Q59GN2	1746.127685546875	1922.67	0.1389549776636935	0.1389549776636935	10.110723519215714	1.1011072351921571	0.00495329	0.0696213	5.425881862640381	0.0422429	P62891;Q59GN2	RL39_HUMAN;R39L5_HUMAN	60S ribosomal protein L39;Putative 60S ribosomal protein L39-like 5	RPL39;RPL39P5	P62891;Q59GN2	Homo sapiens	19.6%;19.6%	6406.67;6322.59	;	;	;	sp	9606	1;5	2	UP000005640_9606		2	3
TRUE	t4 / t3	t4	t3	12	P28074	605.9617919921875	615.8314208984375	0.023308648720586723	0.023308648720586723	1.628754326869708	1.016287543268697	0.00504373	0.0701837	4.938470363616943	0.022866639298679225	P28074	PSB5_HUMAN	Proteasome subunit beta type-5	PSMB5	P28074	Homo sapiens	0.369	28480.3			nucleoplasm,centrosome	sp	9606	1	3	UP000005640_9606		9	12
TRUE	t4 / t3	t4	t3	12	Q7Z4V5	1711.86	1818.2901611328125	0.0870154	0.0870154	6.217050139835911	1.0621705013983591	0.00501509	0.0701837	6.06859	0.0305444	Q7Z4V5	HDGR2_HUMAN	Hepatoma-derived growth factor-related protein 2	HDGFL2	Q7Z4V5	Homo sapiens	0.329	74316.8				sp	9606	1	1	UP000005640_9606		23	28
TRUE	t4 / t3	t4	t3	12	Q9HA82	12.572622299194336	14.008316040039062	0.15599795054399385	0.15599795054399385	11.419206802519843	1.1141920680251984	0.00503566	0.0701837	7.499300003051758	0.05813	Q9HA82	CERS4_HUMAN	Ceramide synthase 4	CERS4	Q9HA82	Homo sapiens	0.046	46398.8				sp	9606	1	2	UP000005640_9606		3	4
TRUE	t4 / t3	t4	t3	12	Q9HCN8	129.83738708496094	152.46299743652344	0.23175327327474396	0.23175327327474396	17.426113432764257	1.1742611343276426	0.00503195	0.0701837	5.74466	0.0485469	Q9HCN8	SDF2L_HUMAN	Stromal cell-derived factor 2-like protein 1	SDF2L1	Q9HCN8	Homo sapiens	0.575	23598.3				sp	9606	1	2	UP000005640_9606		8	11
TRUE	t4 / t3	t4	t3	12	Q12873	326.7769775390625	346.5215759277344	0.0846388	0.0846388	6.0422244361788335	1.0604222443617883	0.0050899	0.0705613	6.184076309204102	0.018085831574493078	Q12873	CHD3_HUMAN	Chromodomain-helicase-DNA-binding protein 3	CHD3	Q12873	Homo sapiens	0.285	226592			nucleoplasm,nucleolus,centriolar satellite	sp	9606	1	3	UP000005640_9606		54	71
TRUE	t4 / t3	t4	t3	12	Q9BW91	88.77643585205078	94.03396606445312	0.0830052	0.0830052	5.9222136617020915	1.059222136617021	0.00515108	0.0707175	5.305760383605957	0.031517228356003416	Q9BW91	NUDT9_HUMAN	ADP-ribose pyrophosphatase, mitochondrial	NUDT9	Q9BW91	Homo sapiens	0.294	39125			mitochondrion,nuclear body,cell junction,nuclear membrane	sp	9606	1	1	UP000005640_9606		10	12
TRUE	t4 / t3	t4	t3	12	Q9BZQ8	395.2847595214844	435.39398193359375	0.139429	0.139429	10.14691850519711	1.1014691850519711	0.00515295	0.0707175	4.793642044067383	0.0359554	Q9BZQ8	NIBA1_HUMAN	Protein Niban 1	NIBAN1	Q9BZQ8	Homo sapiens	0.196	103135				sp	9606	1	1	UP000005640_9606		19	24
TRUE	t4 / t3	t4	t3	12	P48960	171.2791748046875	185.107	0.11200728260883364	0.11200728260883364	8.073085746825459	1.0807308574682546	0.00523611	0.0712354	5.387523651123047	0.031798183330271464	P48960	AGRE5_HUMAN	Adhesion G protein-coupled receptor E5	ADGRE5	P48960	Homo sapiens	0.139	91869.3				sp	9606	1	4	UP000005640_9606		8	13
TRUE	t4 / t3	t4	t3	12	Q92522	1281.4012451171875	1361.79	0.0877778	0.0877778	6.2732019343372025	1.062732019343372	0.00526757	0.0712354	6.881152629852295	0.028939533603551296	Q92522	H1X_HUMAN	Histone H1.10	H1-10	Q92522	Homo sapiens	0.413	22487.1				sp	9606	1	1	UP000005640_9606		10	17
TRUE	t4 / t3	t4	t3	12	Q92567	30.335128784179688	21.28819465637207	-0.510936	0.5109358288325918	-29.8233	0.7017670769696631	0.00526743	0.0712354	5.2562103271484375	0.0851181	Q92567	F168A_HUMAN	Protein FAM168A	FAM168A	Q92567	Homo sapiens	0.148	26184.3		protein binding		sp	9606	1	2	UP000005640_9606		3	3
TRUE	t4 / t3	t4	t3	12	Q13451	765.1690673828125	806.516	0.0759248	0.0759248	5.403648377980197	1.054036483779802	0.00532355	0.0713189	4.961202621459961	0.023851486762419827	Q13451	FKBP5_HUMAN	Peptidyl-prolyl cis-trans isomerase FKBP5	FKBP5	Q13451	Homo sapiens	0.604	51212.2			nucleoplasm	sp	9606	1	2	UP000005640_9606		32	53
TRUE	t4 / t3	t4	t3	12	Q92879	94.29973602294922	107.6916732788086	0.19158106757594964	0.19158106757594964	14.20145784140927	1.1420145784140927	0.00531861	0.0713189	5.462430477142334	0.0366267	Q92879	CELF1_HUMAN	CUGBP Elav-like family member 1	CELF1	Q92879	Homo sapiens	0.2	52063.1		protein binding	nucleoplasm	sp	9606	1	2	UP000005640_9606		11	20
TRUE	t4 / t3	t4	t3	12	P43652	18.26299476623535	29.381010055541992	0.6859606355984545	0.6859606355984545	60.87728453967276	1.6087728453967276	0.00538067	0.0713401	7.180942535400391	0.12618502813085802	P43652	AFAM_HUMAN	Afamin	AFM	P43652	Homo sapiens	0.162	69069.1				sp	9606	1	1	UP000005640_9606		9	9
TRUE	t4 / t3	t4	t3	12	Q8WZ82	17.2446	13.771872520446777	-0.324423	0.32442283018400286	-20.1382	0.798618	0.00534522	0.0713401	5.303599834442139	0.0616916	Q8WZ82	OVCA2_HUMAN	Esterase OVCA2	OVCA2	Q8WZ82	Homo sapiens	0.163	24418				sp	9606	1	1	UP000005640_9606		3	4
TRUE	t4 / t3	t4	t3	12	Q9UKX7	469.1513977050781	512.7859497070312	0.1283031693670291	0.1283031693670291	9.300740062887547	1.0930074006288755	0.00538105	0.0713401	7.02239	0.0325045	Q9UKX7	NUP50_HUMAN	Nuclear pore complex protein Nup50	NUP50	Q9UKX7	Homo sapiens	0.506	50144.2			nucleoplasm,nuclear membrane	sp	9606	1	2	UP000005640_9606		20	26
TRUE	t4 / t3	t4	t3	12	Q9Y266	2440.28	2576.209228515625	0.0782049	0.0782049	5.570366851705599	1.055703668517056	0.00536965	0.0713401	7.219356536865234	0.026200776856437173	Q9Y266	NUDC_HUMAN	Nuclear migration protein nudC	NUDC	Q9Y266	Homo sapiens	0.619	38242.9				sp	9606	1	1	UP000005640_9606		25	47
TRUE	t4 / t3	t4	t3	12	P10619	281.3063049316406	328.0508728027344	0.22177767129747508	0.22177767129747508	16.616964160278247	1.1661696416027825	0.00555734	0.0718529	5.621608734130859	0.0459438	P10619	PPGB_HUMAN	Lysosomal protective protein	CTSA	P10619	Homo sapiens	0.15	54466.1			intracellular membrane-bounded organelle	sp	9606	1	2	UP000005640_9606		7	11
TRUE	t4 / t3	t4	t3	12	Q99442	235.64886474609375	263.341	0.1602937764811078	0.1602937764811078	11.751467479747447	1.1175146747974745	0.00553171	0.0718529	5.304454803466797	0.0330582	Q99442	SEC62_HUMAN	Translocation protein SEC62	SEC62	Q99442	Homo sapiens	0.195	45861.8				sp	9606	1	1	UP000005640_9606		11	16
TRUE	t4 / t3	t4	t3	12	Q9BQT9	17.17867088317871	23.443960189819336	0.4485978733890172	0.4485978733890172	36.47132743415891	1.364713274341589	0.00549622	0.0718529	4.022823333740234	0.0721427	Q9BQT9	CSTN3_HUMAN	Calsyntenin-3	CLSTN3	Q9BQT9	Homo sapiens	0.052	106098	protein secretion,negative regulation of lipid storage,L-ascorbic acid metabolic process,positive regulation of lipid catabolic process,regulation of synapse assembly,sympathetic neuron projection extension,cell-cell adhesion,Requires Ontology,excitatory synapse assembly,inhibitory synapse assembly,regulation of excitatory synapse assembly,negative regulation of excitatory synapse assembly,adapti…	enzyme inhibitor activity,protein binding,neurexin family protein binding,protein binding involved in cell-cell adhesion	endoplasmic reticulum membrane,lipid particle,organelle membrane contact site	sp	9606	1	1	UP000005640_9606		4	4
TRUE	t4 / t3	t4	t3	12	Q9BSJ5	16.183429718017578	12.647103309631348	-0.35571	0.35571039916882863	-21.8515	0.7814847365482043	0.00555482	0.0718529	3.8512980937957764	0.052994911063676084	Q9BSJ5	CQ080_HUMAN	Uncharacterized protein C17orf80	C17orf80	Q9BSJ5	Homo sapiens	0.161	67315.2				sp	9606	1	2	UP000005640_9606		10	11
TRUE	t4 / t3	t4	t3	12	Q9BZL1	287.46551513671875	423.40045166015625	0.5586339101034097	0.5586339101034097	47.28738904866094	1.4728738904866094	0.00548362	0.0718529	7.183999538421631	0.14610462746287609	Q9BZL1	UBL5_HUMAN	Ubiquitin-like protein 5	UBL5	Q9BZL1	Homo sapiens	0.219	8546.92				sp	9606	1	1	UP000005640_9606		2	2
TRUE	t4 / t3	t4	t3	12	Q9Y2L1	188.37367248535156	204.3774871826172	0.11763894283156427	0.11763894283156427	8.49578	1.084957810112823	0.00564877	0.0720574	5.567427158355713	0.0314928	Q9Y2L1	RRP44_HUMAN	Exosome complex exonuclease RRP44	DIS3	Q9Y2L1	Homo sapiens	0.416	109003			nucleoplasm,cytosol	sp	9606	1	2	UP000005640_9606		39	57
TRUE	t4 / t3	t4	t3	12	E9PRG8	349.8299255371094	385.42633056640625	0.13980142618786978	0.13980142618786978	10.175345912630007	1.10175	0.00566707	0.0721072	3.5984842777252197	0.0328488	E9PRG8	CK098_HUMAN	Uncharacterized protein C11orf98	C11orf98	E9PRG8	Homo sapiens	0.463	14233.7				sp	9606	4	2	UP000005640_9606		8	16
TRUE	t4 / t3	t4	t3	12	P05106	484.3734130859375	499.113	0.043246909631232004	0.043246909631232004	3.0430291228272566	1.0304302912282726	0.00575162	0.0721085	4.819247722625732	0.0226967	P05106	ITB3_HUMAN	Integrin beta-3	ITGB3	P05106	Homo sapiens	0.188	87057.8			nucleoplasm,plasma membrane	sp	9606	1	2	UP000005640_9606		14	16
TRUE	t4 / t3	t4	t3	12	Q13889	20.416492462158203	25.71324348449707	0.33277657050281767	0.33277657050281767	25.94349167544989	1.259434916754499	0.00575272	0.0721085	6.41187	0.0648852	Q13889	TF2H3_HUMAN	General transcription factor IIH subunit 3	GTF2H3	Q13889	Homo sapiens	0.182	34378.1			nucleoplasm	sp	9606	1	2	UP000005640_9606		5	8
TRUE	t4 / t3	t4	t3	12	Q15404	253.2674102783203	310.7938537597656	0.295297	0.295297	22.713717259646018	1.2271371725964602	0.0057373	0.0721085	6.222408771514893	0.0605971	Q15404	RSU1_HUMAN	Ras suppressor protein 1	RSU1	Q15404	Homo sapiens	0.361	31540.3				sp	9606	1	3	UP000005640_9606		12	18
TRUE	t4 / t3	t4	t3	12	Q8N6M0	114.59037017822266	122.57862091064453	0.0972216	0.0972216	6.971136160916247	1.0697113616091625	0.0058578	0.0726631	6.2698445320129395	0.035772173000148864	Q8N6M0	OTU6B_HUMAN	Deubiquitinase OTUD6B	OTUD6B	Q8N6M0	Homo sapiens	0.328	33812.6	negative regulation of translation,positive regulation of translation			sp	9606	1	1	UP000005640_9606		9	11
TRUE	t4 / t3	t4	t3	12	Q9NVU7	195.6989288330078	215.48544311523438	0.1389545535822125	0.1389545535822125	10.110691152076079	1.1011069115207608	0.00584714	0.0726631	5.922040939331055	0.030710616648613284	Q9NVU7	SDA1_HUMAN	Protein SDA1 homolog	SDAD1	Q9NVU7	Homo sapiens	0.32	79871.3			nucleoplasm,nucleolus	sp	9606	1	3	UP000005640_9606		25	27
TRUE	t4 / t3	t4	t3	10	Q96N16	42.16789627075195	105.32008361816406	1.3205636185184833	1.3205636185184833	149.7636660409238	2.497636660409238	0.00596939	0.0734202	3.159191608428955	0.22174661618260416	Q96N16	JKIP1_HUMAN	Janus kinase and microtubule-interacting protein 1	JAKMIP1	Q96N16	Homo sapiens	0.014	73209.1				sp	9606	1	1	UP000005640_9606		1	1
TRUE	t4 / t3	t4	t3	12	O15155	30.495990753173828	60.66334915161133	0.9922055627297119	0.9922055627297119	98.92237521516782	1.9892237521516782	0.00602703	0.07356	4.100179672241211	0.12801800812139916	O15155	BET1_HUMAN	BET1 homolog	BET1	O15155	Homo sapiens	0.246	13289.4		protein binding		sp	9606	1	1	UP000005640_9606		2	3
TRUE	t4 / t3	t4	t3	12	Q9Y4D8	18.163530349731445	19.40007972717285	0.0950179	0.0950179	6.807869140151435	1.0680786914015143	0.00608711	0.0737198	4.991842269897461	0.022984780932165463	Q9Y4D8	HECD4_HUMAN	Probable E3 ubiquitin-protein ligase HECTD4	HECTD4	Q9Y4D8	Homo sapiens	0.089	439344				sp	9606	1	5	UP000005640_9606		38	43
TRUE	t4 / t3	t4	t3	12	Q16762	463.65447998046875	515.083	0.15175416887298596	0.15175416887298596	11.091941502123003	1.11092	0.00613919	0.0739627	5.4270758628845215	0.044455279725320776	Q16762	THTR_HUMAN	Thiosulfate sulfurtransferase	TST	Q16762	Homo sapiens	0.492	33428.9				sp	9606	1	4	UP000005640_9606		10	13
TRUE	t4 / t3	t4	t3	12	O43312	36.85011291503906	31.943689346313477	-0.206138	0.2061380931076094	-13.3145	0.8668545852210074	0.00615466	0.0740022	7.0921735763549805	0.0390555	O43312	MTSS1_HUMAN	Protein MTSS 1	MTSS1	O43312	Homo sapiens	0.219	82251.1				sp	9606	1	2	UP000005640_9606		18	19
TRUE	t4 / t3	t4	t3	12	P13637	1139.99	1453.5101318359375	0.35052089810575243	0.35052089810575243	27.50209020609946	1.2750209020609946	0.00617932	0.0741835	5.5799665451049805	0.0756226	P13637	AT1A3_HUMAN	Sodium/potassium-transporting ATPase subunit alpha-3	ATP1A3	P13637	Homo sapiens	0.198	111749				sp	9606	1	3	UP000005640_9606		20	31
TRUE	t4 / t3	t4	t3	12	P26641	5362.27	5607.67	0.0645579	0.0645579	4.576442623595689	1.045764426235957	0.00621209	0.0743248	5.141965389251709	0.0391906	P26641	EF1G_HUMAN	Elongation factor 1-gamma	EEF1G	P26641	Homo sapiens	0.487	50118.8		protein binding		sp	9606	1	3	UP000005640_9606		26	41
TRUE	t4 / t3	t4	t3	12	Q8TCC7	669.736	1687.405517578125	1.3331426452585688	1.3331426452585688	151.95090619187982	2.5195090619187983	0.00626027	0.0746743	4.342522621154785	0.18128105880468684	Q8TCC7	S22A8_HUMAN	Organic anion transporter 3	SLC22A8	Q8TCC7	Homo sapiens	0.013	59856.2				sp	9606	1	1	UP000005640_9606		1	1
TRUE	t4 / t3	t4	t3	12	Q9Y3A5	187.58424377441406	188.40940856933594	0.00633236	0.00633236	0.4398902478793598	1.0043989024787936	0.00632609	0.0749503	5.223369598388672	0.017568687117037164	Q9Y3A5	SBDS_HUMAN	Ribosome maturation protein SBDS	SBDS	Q9Y3A5	Homo sapiens	0.388	28763.5				sp	9606	1	4	UP000005640_9606		13	16
TRUE	t4 / t3	t4	t3	12	Q92993	44.64017105102539	49.095802307128906	0.13725712407643464	0.13725712407643464	9.981214567951735	1.0998121456795174	0.00634374	0.0750862	4.024101257324219	0.0360328	Q92993	KAT5_HUMAN	Histone acetyltransferase KAT5	KAT5	Q92993	Homo sapiens	0.179	58582.1	positive regulation of innate immune response	protein binding,peptide-lysine-N-acetyltransferase activity	nucleoplasm,cytosol,intracellular membrane-bounded organelle	sp	9606	1	2	UP000005640_9606		11	11
TRUE	t4 / t3	t4	t3	12	Q13123	417.5934143066406	436.42694091796875	0.0636412	0.0636412	4.51002	1.0451001523637502	0.00639155	0.0753582	5.789753437042236	0.0295907	Q13123	RED_HUMAN	Protein Red	IK	Q13123	Homo sapiens	0.397	65602.2				sp	9606	1	3	UP000005640_9606		22	29
TRUE	t4 / t3	t4	t3	12	Q86VP3	9.127287864685059	8.036527633666992	-0.183614	0.18361394660110578	-11.9505	0.8804945951975074	0.0065137	0.0759451	6.6207990646362305	0.046197205581431186	Q86VP3	PACS2_HUMAN	Phosphofurin acidic cluster sorting protein 2	PACS2	Q86VP3	Homo sapiens	0.121	97702.3			mitochondrion	sp	9606	1	3	UP000005640_9606		10	12
TRUE	t4 / t3	t4	t3	12	Q8WXF7	66.52535247802734	74.14189147949219	0.1563846718636645	0.1563846718636645	11.449077258148321	1.1144907725814832	0.00658361	0.0760541	5.278173446655273	0.039722509384067475	Q8WXF7	ATLA1_HUMAN	Atlastin-1	ATL1	Q8WXF7	Homo sapiens	0.33	63543.5		protein binding,identical protein binding		sp	9606	1	1	UP000005640_9606		15	17
TRUE	t4 / t3	t4	t3	12	Q8N0S6	20.479204177856445	33.90810012817383	0.7274702991042264	0.7274702991042264	65.57332908882098	1.6557332908882099	0.00673271	0.0770613	5.078609943389893	0.1125720692837491	Q8N0S6	CENPL_HUMAN	Centromere protein L	CENPL	Q8N0S6	Homo sapiens	0.029	38997.8				sp	9606	1	2	UP000005640_9606		2	2
TRUE	t4 / t3	t4	t3	12	Q96GV9	16.09449577331543	12.9783	-0.310469	0.31046912884305583	-19.362	0.8063795018600639	0.00674503	0.0771296	4.096237659454346	0.0647197	Q96GV9	MACIR_HUMAN	Macrophage immunometabolism regulator	MACIR	Q96GV9	Homo sapiens	0.175	23083.4				sp	9606	1	1	UP000005640_9606		3	3
TRUE	t4 / t3	t4	t3	12	Q99728	20.664270401000977	21.995227813720703	0.0900521	0.0900521	6.4408633205615295	1.0644086332056153	0.00679133	0.077586	6.273723602294922	0.0344431	Q99728	BARD1_HUMAN	BRCA1-associated RING domain protein 1	BARD1	Q99728	Homo sapiens	0.118	86647.8		protein binding	nucleoplasm,nuclear speck,cytoplasmic ribonucleoprotein granule	sp	9606	1	2	UP000005640_9606		11	11
TRUE	t4 / t3	t4	t3	12	Q92995	112.20126342773438	99.43415069580078	-0.174276	0.17427558516461852	-11.3788	0.8862123977761042	0.00681391	0.0776165	5.544632434844971	0.0300012	Q92995	UBP13_HUMAN	Ubiquitin carboxyl-terminal hydrolase 13	USP13	Q92995	Homo sapiens	0.235	97327.1				sp	9606	1	2	UP000005640_9606		18	22
TRUE	t4 / t3	t4	t3	12	P33316	1411.2923583984375	1664.5433349609375	0.23810954773384044	0.23810954773384044	17.944614739492692	1.179446147394927	0.00689041	0.0781427	3.931269407272339	0.042936444159728644	P33316	DUT_HUMAN	Deoxyuridine 5'-triphosphate nucleotidohydrolase, mitochondrial	DUT	P33316	Homo sapiens	0.381	26563.2			nucleoplasm	sp	9606	1	4	UP000005640_9606		10	16
TRUE	t4 / t3	t4	t3	12	Q96CN7	147.637	157.0147247314453	0.0888459	0.0888459	6.351906499030124	1.0635190649903012	0.00690688	0.0781706	6.395677089691162	0.0327092	Q96CN7	ISOC1_HUMAN	Isochorismatase domain-containing protein 1	ISOC1	Q96CN7	Homo sapiens	0.487	32236.7				sp	9606	1	3	UP000005640_9606		11	20
TRUE	t4 / t3	t4	t3	12	P31785	55.25078201293945	67.36674499511719	0.28604170894959463	0.28604170894959463	21.929034378807955	1.2192903437880795	0.00693008	0.0783253	4.343027114868164	0.0481979	P31785	IL2RG_HUMAN	Cytokine receptor common subunit gamma	IL2RG	P31785	Homo sapiens	0.138	42287			nucleoplasm,endoplasmic reticulum,plasma membrane	sp	9606	1	1	UP000005640_9606		4	6
TRUE	t4 / t3	t4	t3	12	Q8N3U4	219.4611053466797	227.787	0.053720829822909655	0.053720829822909655	3.793840377850932	1.0379384037785093	0.00695178	0.0783866	4.257833003997803	0.027840883432349826	Q8N3U4	STAG2_HUMAN	Cohesin subunit SA-2	STAG2	Q8N3U4	Homo sapiens	0.245	141326			fibrillar center,nucleoplasm,nucleolus	sp	9606	1	3	UP000005640_9606		33	44
TRUE	t4 / t3	t4	t3	12	P28065	707.0838623046875	818.6618041992188	0.21138625274870826	0.21138625274870826	15.78001533380371	1.157800153338037	0.00699094	0.0784974	4.114821910858154	0.0435201	P28065	PSB9_HUMAN	Proteasome subunit beta type-9	PSMB9	P28065	Homo sapiens	0.416	23264.3			cytosol	sp	9606	1	2	UP000005640_9606		8	13
TRUE	t4 / t3	t4	t3	12	P46020	33.36970901489258	38.04594039916992	0.1892034164060651	0.1892034164060651	14.013401741652554	1.1401340174165255	0.00701331	0.0784974	4.91595	0.0350036	P46020	KPB1_HUMAN	Phosphorylase b kinase regulatory subunit alpha, skeletal muscle isoform	PHKA1	P46020	Homo sapiens	0.13	137312		protein binding		sp	9606	1	2	UP000005640_9606		16	17
TRUE	t4 / t3	t4	t3	12	Q06265	303.1863708496094	368.0354919433594	0.27963999958257885	0.27963999958257885	21.389194016876623	1.2138919401687662	0.00700743	0.0784974	7.505364418029785	0.068181	Q06265	EXOS9_HUMAN	Exosome complex component RRP45	EXOSC9	Q06265	Homo sapiens	0.159	48949			nucleolus,nucleus	sp	9606	1	3	UP000005640_9606		6	7
TRUE	t4 / t3	t4	t3	12	Q8WUX2	44.91910171508789	51.5169	0.1977155054067842	0.1977155054067842	14.688084089430454	1.1468808408943045	0.00700092	0.0784974	6.219381809234619	0.050656895791419854	Q8WUX2	CHAC2_HUMAN	Glutathione-specific gamma-glutamylcyclotransferase 2	CHAC2	Q8WUX2	Homo sapiens	0.375	20874.7				sp	9606	1	1	UP000005640_9606		9	10
TRUE	t4 / t3	t4	t3	12	Q02218	538.6111450195312	591.1387329101562	0.13425267012422706	0.13425267012422706	9.752413847418673	1.0975241384741867	0.00707041	0.0786292	5.9136481285095215	0.0314596	Q02218	ODO1_HUMAN	2-oxoglutarate dehydrogenase complex component E1	OGDH	Q02218	Homo sapiens	0.42	115935			mitochondrion	sp	9606	1	3	UP000005640_9606		41	57
TRUE	t4 / t3	t4	t3	12	Q13867	800.3302001953125	874.675	0.12815219259698002	0.12815219259698002	9.289302434831814	1.0928930243483181	0.00706251	0.0786292	5.568408012390137	0.0339057	Q13867	BLMH_HUMAN	Bleomycin hydrolase	BLMH	Q13867	Homo sapiens	0.38	52562.2				sp	9606	1	1	UP000005640_9606		16	26
TRUE	t4 / t3	t4	t3	12	Q08211	2538.76	2796.579833984375	0.1395396315160769	0.1395396315160769	10.155355061565041	1.1015535506156504	0.00708869	0.0786497	3.698807954788208	0.027493480355842113	Q08211	DHX9_HUMAN	ATP-dependent RNA helicase A	DHX9	Q08211	Homo sapiens	0.414	140958			nucleoplasm,nucleolus	sp	9606	1	4	UP000005640_9606		52	83
TRUE	t4 / t3	t4	t3	12	Q86X55	125.77750396728516	137.58163452148438	0.12941398966019513	0.12941398966019513	9.384929881634063	1.0938492988163406	0.00708169	0.0786497	5.928297996520996	0.0404832	Q86X55	CARM1_HUMAN	Histone-arginine methyltransferase CARM1	CARM1	Q86X55	Homo sapiens	0.217	65853.7			nucleoplasm,cytosol	sp	9606	1	3	UP000005640_9606		13	16
TRUE	t4 / t3	t4	t3	12	Q9C0H2	47.801631927490234	54.068599700927734	0.17773112112924874	0.17773112112924874	13.11036364395215	1.1311036364395215	0.00711229	0.0787344	4.440408229827881	0.039498898010680024	Q9C0H2	TTYH3_HUMAN	Protein tweety homolog 3	TTYH3	Q9C0H2	Homo sapiens	0.153	57544.7				sp	9606	1	3	UP000005640_9606		7	8
TRUE	t4 / t3	t4	t3	12	Q9H8P0	30.728710174560547	20.83414077758789	-0.560638	0.5606376086793101	-32.1998	0.6780024498013556	0.00710872	0.0787344	4.232644081115723	0.0634215	Q9H8P0	PORED_HUMAN	Polyprenol reductase	SRD5A3	Q9H8P0	Homo sapiens	0.097	36521.3				sp	9606	1	1	UP000005640_9606		4	5
TRUE	t4 / t3	t4	t3	12	P02671	38.14656448364258	44.03046798706055	0.2069490459383696	0.2069490459383696	15.424465041775948	1.1542446504177595	0.00723162	0.0793501	5.42132	0.0609897	P02671	FIBA_HUMAN	Fibrinogen alpha chain	FGA	P02671	Homo sapiens	0.171	94973	blood coagulation, common pathway,negative regulation of blood coagulation, common pathway	protein binding	endoplasmic reticulum	sp	9606	1	2	UP000005640_9606		15	15
TRUE	t4 / t3	t4	t3	12	O00329	292.53863525390625	324.446	0.1493503212932007	0.1493503212932007	10.906991994288283	1.1090699199428828	0.00733467	0.0797005	4.649187088012695	0.0352606	O00329	PK3CD_HUMAN	Phosphatidylinositol 4,5-bisphosphate 3-kinase catalytic subunit delta isoform	PIK3CD	O00329	Homo sapiens	0.205	119479		protein binding		sp	9606	1	2	UP000005640_9606		23	27
TRUE	t4 / t3	t4	t3	12	P02765	117.69376373291016	131.2772216796875	0.1575787334473268	0.1575787334473268	11.541357431310573	1.1154135743131057	0.0073712	0.0797005	4.539781093597412	0.0669447	P02765	FETUA_HUMAN	Alpha-2-HS-glycoprotein	AHSG	P02765	Homo sapiens	0.101	39340.7				sp	9606	1	2	UP000005640_9606		3	3
TRUE	t4 / t3	t4	t3	12	P46531	32.40536117553711	26.460256576538086	-0.292405	0.29240546274313917	-18.3461	0.8165394742309801	0.00742926	0.0797005	4.046361923217773	0.028220359292356927	P46531	NOTC1_HUMAN	Neurogenic locus notch homolog protein 1	NOTCH1	P46531	Homo sapiens	0.05	272505		protein binding		sp	9606	1	4	UP000005640_9606		15	16
TRUE	t4 / t3	t4	t3	12	P54274	16.964868545532227	19.627241134643555	0.21030714622074512	0.21030714622074512	15.693446618615114	1.1569344661861511	0.00736254	0.0797005	6.472742557525635	0.0563296	P54274	TERF1_HUMAN	Telomeric repeat-binding factor 1	TERF1	P54274	Homo sapiens	0.182	50245.6	telomere maintenance via telomerase	double-stranded telomeric DNA binding,protein binding,microtubule binding,telomeric DNA binding,identical protein binding	spindle,chromosome, telomeric region,fibrillar center,nucleus,nucleolus,nuclear body	sp	9606	1	3	UP000005640_9606		10	12
TRUE	t4 / t3	t4	t3	12	Q01459	70.27394104003906	78.36124420166016	0.15715049580664472	0.15715049580664472	11.508253332502427	1.1150825333250243	0.00730525	0.0797005	4.569944858551025	0.0294434	Q01459	DIAC_HUMAN	Di-N-acetylchitobiase	CTBS	Q01459	Homo sapiens	0.283	43759.8				sp	9606	1	1	UP000005640_9606		10	13
TRUE	t4 / t3	t4	t3	12	Q8NE71	665.8770751953125	701.9105224609375	0.0760313	0.0760313	5.411426313941781	1.0541142631394178	0.00734433	0.0797005	4.570214748382568	0.0243334	Q8NE71	ABCF1_HUMAN	ATP-binding cassette sub-family F member 1	ABCF1	Q8NE71	Homo sapiens	0.341	95925.7	ribosome biogenesis,translational initiation,positive regulation of translation	protein binding,ATP binding,translation activator activity,ribosome binding	nuclear envelope,nucleoplasm,cytoplasm,cytosol,polysomal ribosome	sp	9606	1	2	UP000005640_9606		32	41
TRUE	t4 / t3	t4	t3	12	Q8TAE8	191.213	218.91783142089844	0.19520968458616159	0.19520968458616159	14.489054950919812	1.144890549509198	0.00736914	0.0797005	6.4241	0.059606	Q8TAE8	G45IP_HUMAN	Growth arrest and DNA damage-inducible proteins-interacting protein 1	GADD45GIP1	Q8TAE8	Homo sapiens	0.41	25383.8				sp	9606	1	1	UP000005640_9606		7	8
TRUE	t4 / t3	t4	t3	12	Q9UKD2	928.968	995.1141967773438	0.0992332	0.0992332	7.120393592415142	1.0712039359241514	0.00732289	0.0797005	4.150443077087402	0.0314558	Q9UKD2	MRT4_HUMAN	mRNA turnover protein 4 homolog	MRTO4	Q9UKD2	Homo sapiens	0.427	27560.5				sp	9606	1	2	UP000005640_9606		16	23
TRUE	t4 / t3	t4	t3	12	Q9UPP1	85.1339	91.40406799316406	0.10252446398779554	0.10252446398779554	7.365052042035103	1.073650520420351	0.00737573	0.0797005	6.846226215362549	0.0378139	Q9UPP1	PHF8_HUMAN	Histone lysine demethylase PHF8	PHF8	Q9UPP1	Homo sapiens	0.244	117864		protein binding	nucleoplasm,nuclear membrane	sp	9606	1	3	UP000005640_9606		23	24
TRUE	t4 / t3	t4	t3	12	Q9Y3P9	86.1271	91.79441833496094	0.0919396	0.0919396	6.580210841708567	1.0658021084170857	0.00753904	0.0800445	4.613678932189941	0.0305927	Q9Y3P9	RBGP1_HUMAN	Rab GTPase-activating protein 1	RABGAP1	Q9Y3P9	Homo sapiens	0.297	121737			cytosol	sp	9606	1	3	UP000005640_9606		31	35
TRUE	t4 / t3	t4	t3	12	P35579	3319.47	3468.21	0.0632401	0.0632401	4.480964857519587	1.0448096485751959	0.00756935	0.0800514	4.695063591003418	0.025501454801943903	P35579	MYH9_HUMAN	Myosin-9	MYH9	P35579	Homo sapiens	0.508	226532			cytosol,plasma membrane,actin cytoskeleton,nuclear body	sp	9606	1	4	UP000005640_9606		120	218
TRUE	t4 / t3	t4	t3	12	P14314	2873.68	3270.73	0.18671213633109054	0.18671213633109054	13.816690582205315	1.1381669058220532	0.00761421	0.0802904	2.966782569885254	0.034888293663230596	P14314	GLU2B_HUMAN	Glucosidase 2 subunit beta	PRKCSH	P14314	Homo sapiens	0.377	59425.4			endoplasmic reticulum	sp	9606	1	2	UP000005640_9606		23	39
TRUE	t4 / t3	t4	t3	12	P15056	37.991920471191406	40.806278228759766	0.10309849306417715	0.10309849306417715	7.407779661210956	1.0740777966121096	0.00762742	0.0802904	7.441221237182617	0.0415762	P15056	BRAF_HUMAN	Serine/threonine-protein kinase B-raf	BRAF	P15056	Homo sapiens	0.063	84436.9				sp	9606	1	4	UP000005640_9606		8	9
TRUE	t4 / t3	t4	t3	12	O95757	478.94390869140625	523.5739135742188	0.1285365133199627	0.1285365133199627	9.318419980484304	1.093184199804843	0.00766595	0.0803504	5.37308	0.032755478911942776	O95757	HS74L_HUMAN	Heat shock 70 kDa protein 4L	HSPA4L	O95757	Homo sapiens	0.4	94512.5				sp	9606	1	3	UP000005640_9606		29	41
TRUE	t4 / t3	t4	t3	12	Q9UPN7	395.6264953613281	465.39544677734375	0.23431804857484553	0.23431804857484553	17.63505534488918	1.1763505534488918	0.00765105	0.0803504	3.555490016937256	0.0453692	Q9UPN7	PP6R1_HUMAN	Serine/threonine-protein phosphatase 6 regulatory subunit 1	PPP6R1	Q9UPN7	Homo sapiens	0.338	96723.7				sp	9606	1	5	UP000005640_9606		21	23
TRUE	t4 / t3	t4	t3	12	P55008	139.43319702148438	109.5350570678711	-0.348181	0.3481814036709546	-21.4426	0.7855737328535437	0.00772431	0.0804494	5.891585350036621	0.0521064	P55008	AIF1_HUMAN	Allograft inflammatory factor 1	AIF1	P55008	Homo sapiens	0.218	16703.3				sp	9606	1	1	UP000005640_9606		4	5
TRUE	t4 / t3	t4	t3	12	P07477;Q9BYE2	67.86576843261719	38.068023681640625	-0.834104	0.8341043872963277	-43.9069	0.5609311521969687	0.0077405	0.08048	7.213685035705566	0.2054745099361837	P07477;Q9BYE2	TRY1_HUMAN;TMPSD_HUMAN	Serine protease 1;Transmembrane protease serine 13	PRSS1;TMPRSS13	P07477;Q9BYE2	Homo sapiens	3.2%;1.4%	26558.08;63167.15	;	;	;	sp	9606	1;2	1;5	UP000005640_9606		1	1
TRUE	t4 / t3	t4	t3	12	P53396	1838.95	1940.207763671875	0.077328	0.077328	5.506214267431231	1.0550621426743123	0.00780234	0.0808461	5.29411	0.029616569239063723	P53396	ACLY_HUMAN	ATP-citrate synthase	ACLY	P53396	Homo sapiens	0.567	120839			nucleoplasm,cytosol	sp	9606	1	3	UP000005640_9606		60	111
TRUE	t4 / t3	t4	t3	12	O15143	1447.19	1688.2908935546875	0.22230775665379748	0.22230775665379748	16.659820274184113	1.1665982027418411	0.00791845	0.0812682	4.313617706298828	0.0503633	O15143	ARC1B_HUMAN	Actin-related protein 2/3 complex subunit 1B	ARPC1B	O15143	Homo sapiens	0.272	40949.8				sp	9606	1	3	UP000005640_9606		12	16
TRUE	t4 / t3	t4	t3	12	P13674	183.8570556640625	198.51231384277344	0.11064395921884854	0.11064395921884854	7.971006674602976	1.0797100667460298	0.00788998	0.0812682	3.8900699615478516	0.0283468	P13674	P4HA1_HUMAN	Prolyl 4-hydroxylase subunit alpha-1	P4HA1	P13674	Homo sapiens	0.404	61049.3			mitochondrion,endoplasmic reticulum,intracellular membrane-bounded organelle	sp	9606	1	2	UP000005640_9606		19	26
TRUE	t4 / t3	t4	t3	12	Q96BY7	220.98233032226562	251.37803649902344	0.185928	0.185928	13.754812944741236	1.1375481294474123	0.00788442	0.0812682	4.252218246459961	0.0363704	Q96BY7	ATG2B_HUMAN	Autophagy-related protein 2 homolog B	ATG2B	Q96BY7	Homo sapiens	0.208	232763				sp	9606	1	5	UP000005640_9606		43	48
TRUE	t4 / t3	t4	t3	12	P09917	148.34146118164062	188.345	0.3444593653555461	0.3444593653555461	26.96750961199608	1.2696750961199608	0.00799479	0.0814552	4.0372538566589355	0.057749650742153505	P09917	LOX5_HUMAN	Polyunsaturated fatty acid 5-lipoxygenase	ALOX5	P09917	Homo sapiens	0.269	77983.2			nucleoplasm	sp	9606	1	2	UP000005640_9606		19	21
TRUE	t4 / t3	t4	t3	12	Q7L2Z9	24.352094650268555	19.740447998046875	-0.302891	0.3028911400508545	-18.9374	0.8106262841676816	0.00796661	0.0814552	4.23409	0.051523906098453066	Q7L2Z9	CENPQ_HUMAN	Centromere protein Q	CENPQ	Q7L2Z9	Homo sapiens	0.306	30595.3				sp	9606	1	1	UP000005640_9606		7	8
TRUE	t4 / t3	t4	t3	12	P23497	245.05198669433594	258.22198486328125	0.075524	0.075524	5.374369066174034	1.0537436906617403	0.00806737	0.0815189	6.8832597732543945	0.0250407	P23497	SP100_HUMAN	Nuclear autoantigen Sp-100	SP100	P23497	Homo sapiens	0.165	100417	regulation of transcription from RNA polymerase II promoter,response to retinoic acid,negative regulation of viral transcription,response to cytokine,response to type I interferon,negative regulation of transcription, DNA-templated,positive regulation of transcription from RNA polymerase II promoter,retinoic acid receptor signaling pathway,positive regulation of sequence-specific DNA binding tran…	RNA polymerase II transcription factor activity, sequence-specific DNA binding,protein binding,identical protein binding,protein homodimerization activity,protein dimerization activity,RNA polymerase II sequence-specific DNA binding transcription factor binding,chromo shadow domain binding	nucleus,nucleoplasm,nucleolus,cytoplasm,nuclear body,PML body,nuclear periphery	sp	9606	1	3	UP000005640_9606		18	21
TRUE	t4 / t3	t4	t3	12	P25788	1235.129150390625	1468.6727294921875	0.2498510458509379	0.2498510458509379	18.90843390974146	1.1890843390974146	0.00807206	0.0815189	6.5851826667785645	0.0789089	P25788	PSA3_HUMAN	Proteasome subunit alpha type-3	PSMA3	P25788	Homo sapiens	0.424	28433.2		protein binding		sp	9606	1	2	UP000005640_9606		12	21
TRUE	t4 / t3	t4	t3	12	Q6P1Q0	20.133981704711914	22.77482795715332	0.17780764738244204	0.17780764738244204	13.116363624306725	1.1311636362430673	0.00803378	0.0815189	7.540537357330322	0.059804738092941734	Q6P1Q0	LTMD1_HUMAN	LETM1 domain-containing protein 1	LETMD1	Q6P1Q0	Homo sapiens	0.158	41790.3	Requires Ontology	binding, bridging	nucleus,nucleoplasm,nucleolus,mitochondrion	sp	9606	1	1	UP000005640_9606		7	8
TRUE	t4 / t3	t4	t3	12	P17014	12.584	14.346902847290039	0.1891432172925489	0.1891432172925489	14.008644421272942	1.1400864442127294	0.00809239	0.0816229	4.880187034606934	0.0728629	P17014	ZNF12_HUMAN	Zinc finger protein 12	ZNF12	P17014	Homo sapiens	0.032	81201.6			nucleoplasm,centrosome	sp	9606	1	3	UP000005640_9606		2	2
TRUE	t4 / t3	t4	t3	12	P05455	3097.156494140625	3374.845458984375	0.12387715792201386	0.12387715792201386	8.965932634308205	1.089659326343082	0.00810034	0.0816353	4.474289417266846	0.030580274444276464	P05455	LA_HUMAN	Lupus La protein	SSB	P05455	Homo sapiens	0.556	46837.1				sp	9606	1	2	UP000005640_9606		34	58
TRUE	t4 / t3	t4	t3	12	Q14493	112.37864685058594	128.42990112304688	0.19261319659954407	0.19261319659954407	14.283188775001033	1.1428318877500103	0.00811556	0.0817209	5.191832065582275	0.0304056	Q14493	SLBP_HUMAN	Histone RNA hairpin-binding protein	SLBP	Q14493	Homo sapiens	0.181	31285.7			nucleoplasm,nucleolus,cytosol	sp	9606	1	1	UP000005640_9606		6	8
TRUE	t4 / t3	t4	t3	12	Q9BRQ6	40.224510192871094	44.165706634521484	0.13485174064995156	0.13485174064995156	9.797997347271314	1.0979799734727131	0.00814249	0.081721	5.678163051605225	0.030553174845311892	Q9BRQ6	MIC25_HUMAN	MICOS complex subunit MIC25	CHCHD6	Q9BRQ6	Homo sapiens	0.336	26457.7				sp	9606	1	1	UP000005640_9606		8	10
TRUE	t4 / t3	t4	t3	12	Q9Y5U9	35.20439147949219	62.22529983520508	0.8217458716117624	0.8217458716117624	76.75436847546004	1.7675436847546004	0.00812509	0.081721	2.961203098297119	0.16483327167422093	Q9Y5U9	IR3IP_HUMAN	Immediate early response 3-interacting protein 1	IER3IP1	Q9Y5U9	Homo sapiens	0.098	8968.76				sp	9606	1	1	UP000005640_9606		1	1
TRUE	t4 / t3	t4	t3	12	Q9BRK5	87.38299560546875	90.84278106689453	0.0560193	0.0560193	3.9593349226050734	1.0395933492260507	0.00815021	0.0817309	3.4199254512786865	0.019195939557992592	Q9BRK5	CAB45_HUMAN	45 kDa calcium-binding protein	SDF4	Q9BRK5	Homo sapiens	0.323	41806.8		calcium ion binding,protein binding		sp	9606	1	1	UP000005640_9606		10	16
TRUE	t4 / t3	t4	t3	12	P16070	653.683	713.5410766601562	0.12640561202717743	0.12640561202717743	9.157072775384357	1.0915707277538436	0.00819742	0.0817863	3.6842916011810303	0.028376786778051697	P16070	CD44_HUMAN	CD44 antigen	CD44	P16070	Homo sapiens	0.106	81537.6			Golgi apparatus,cytosol,plasma membrane	sp	9606	1	3	UP000005640_9606		7	9
TRUE	t4 / t3	t4	t3	12	P23246	3308.921142578125	3459.242431640625	0.0640952	0.0640952	4.542909383007476	1.0454290938300748	0.00823774	0.0817863	5.47601	0.028321060811754787	P23246	SFPQ_HUMAN	Splicing factor, proline- and glutamine-rich	SFPQ	P23246	Homo sapiens	0.494	76149.3		protein binding	nucleoplasm	sp	9606	1	2	UP000005640_9606		38	77
TRUE	t4 / t3	t4	t3	12	Q96EI5	142.0767364501953	156.01966857910156	0.13505756553175624	0.13505756553175624	9.813663008647389	1.0981366300864739	0.00822613	0.0817863	4.25408	0.0370206	Q96EI5	TCAL4_HUMAN	Transcription elongation factor A protein-like 4	TCEAL4	Q96EI5	Homo sapiens	0.544	24647.2				sp	9606	1	2	UP000005640_9606		13	18
TRUE	t4 / t3	t4	t3	12	P52434	369.3952331542969	382.3224792480469	0.0496248	0.0496248	3.49957	1.0349957036082007	0.00830273	0.0819743	6.217604160308838	0.022840465706611853	P52434	RPAB3_HUMAN	DNA-directed RNA polymerases I, II, and III subunit RPABC3	POLR2H	P52434	Homo sapiens	0.487	17143.3				sp	9606	1	4	UP000005640_9606		6	9
TRUE	t4 / t3	t4	t3	12	Q96G25	54.421634674072266	46.06983947753906	-0.240358	0.24035772064518027	-15.3465	0.8465353853012395	0.0083181	0.0819927	6.535390377044678	0.0509473	Q96G25	MED8_HUMAN	Mediator of RNA polymerase II transcription subunit 8	MED8	Q96G25	Homo sapiens	0.366	29079.9		protein binding		sp	9606	1	2	UP000005640_9606		10	11
TRUE	t4 / t3	t4	t3	12	P25325	167.81427001953125	178.50852966308594	0.0891276	0.0891276	6.3726759603399685	1.0637267596033997	0.00837507	0.0822871	4.151543140411377	0.035507669885956106	P25325	THTM_HUMAN	3-mercaptopyruvate sulfurtransferase	MPST	P25325	Homo sapiens	0.492	33178.5				sp	9606	1	3	UP000005640_9606		12	17
TRUE	t4 / t3	t4	t3	12	Q13162	882.441	965.7597045898438	0.13016378247954322	0.13016378247954322	9.441793840331103	1.094417938403311	0.00837005	0.0822871	5.245787620544434	0.036461850569175704	Q13162	PRDX4_HUMAN	Peroxiredoxin-4	PRDX4	Q13162	Homo sapiens	0.373	30539.9				sp	9606	1	1	UP000005640_9606		10	14
TRUE	t4 / t3	t4	t3	12	Q8IVD9	89.55841827392578	95.21258544921875	0.0883232	0.0883232	6.313384363264407	1.063133843632644	0.00844713	0.0824693	7.246306896209717	0.0412519	Q8IVD9	NUDC3_HUMAN	NudC domain-containing protein 3	NUDCD3	Q8IVD9	Homo sapiens	0.645	40822.1				sp	9606	1	3	UP000005640_9606		21	30
TRUE	t4 / t3	t4	t3	12	P16104	161.72140502929688	103.27326202392578	-0.647044	0.6470438614369517	-36.1413	0.6385874646910047	0.00846049	0.0824713	7.893982410430908	0.11455233834061226	P16104	H2AX_HUMAN	Histone H2AX	H2AX	P16104	Homo sapiens	0.126	15144.6				sp	9606	1	2	UP000005640_9606		3	3
TRUE	t4 / t3	t4	t3	12	Q8IVH4	34.52626419067383	40.00840759277344	0.21260896773516522	0.21260896773516522	15.878182973472232	1.1587818297347223	0.00854319	0.0827913	7.032846450805664	0.0738918	Q8IVH4	MMAA_HUMAN	Methylmalonic aciduria type A protein, mitochondrial	MMAA	Q8IVH4	Homo sapiens	0.225	46538.3				sp	9606	1	1	UP000005640_9606		14	15
TRUE	t4 / t3	t4	t3	12	Q96AK3	14.039559364318848	17.50823211669922	0.3185357589072325	0.3185357589072325	24.706421778420683	1.2470642177842068	0.00858929	0.0828502	4.844788551330566	0.054007020021478995	Q96AK3	ABC3D_HUMAN	DNA dC->dU-editing enzyme APOBEC-3D	APOBEC3D	Q96AK3	Homo sapiens	0.062	46598.4				sp	9606	1	1	UP000005640_9606		2	4
TRUE	t4 / t3	t4	t3	12	P30038	267.19476318359375	286.9886779785156	0.10310208975370942	0.10310208975370942	7.408047432921117	1.0740804743292112	0.00865365	0.0831408	6.195664405822754	0.037149292020972696	P30038	AL4A1_HUMAN	Delta-1-pyrroline-5-carboxylate dehydrogenase, mitochondrial	ALDH4A1	P30038	Homo sapiens	0.433	61719.5			mitochondrion,cytosol	sp	9606	1	3	UP000005640_9606		23	33
TRUE	t4 / t3	t4	t3	12	P23528	8184.74	9863.44	0.2691548112607592	0.2691548112607592	20.510162388338294	1.205101623883383	0.00870639	0.083206	4.945225715637207	0.0613072	P23528	COF1_HUMAN	Cofilin-1	CFL1	P23528	Homo sapiens	0.657	18502.5				sp	9606	1	3	UP000005640_9606		16	22
TRUE	t4 / t3	t4	t3	12	Q86SR1	27.556434631347656	29.31910514831543	0.0894518	0.0894518	6.396584102947034	1.0639658410294703	0.0087122	0.083206	7.147101879119873	0.032087751524969475	Q86SR1	GLT10_HUMAN	Polypeptide N-acetylgalactosaminyltransferase 10	GALNT10	Q86SR1	Homo sapiens	0.214	68991.8				sp	9606	1	2	UP000005640_9606		11	13
TRUE	t4 / t3	t4	t3	12	Q9HCU9	62.38996505737305	72.43921661376953	0.21545694307555685	0.21545694307555685	16.10716009722928	1.1610716009722928	0.00871286	0.083206	6.886005878448486	0.0555258	Q9HCU9	BRMS1_HUMAN	Breast cancer metastasis-suppressor 1	BRMS1	Q9HCU9	Homo sapiens	0.195	28460.6				sp	9606	1	1	UP000005640_9606		5	5
TRUE	t4 / t3	t4	t3	12	Q6P5R6	269.82	291.3436584472656	0.11072294776181643	0.11072294776181643	7.976918323102766	1.0797691832310277	0.0087455	0.0833637	5.705803871154785	0.041425641051797094	Q6P5R6	RL22L_HUMAN	60S ribosomal protein L22-like 1	RPL22L1	Q6P5R6	Homo sapiens	0.197	14606.5				sp	9606	1	2	UP000005640_9606		2	4
TRUE	t4 / t3	t4	t3	12	Q30154	2046.991455078125	2511.232666015625	0.2948906206596199	0.2948906206596199	22.679196329121055	1.2267919632912105	0.00876451	0.0834308	6.151856899261475	0.0902074	Q30154	DRB5_HUMAN	HLA class II histocompatibility antigen, DR beta 5 chain	HLA-DRB5	Q30154	Homo sapiens	0.147	30056				sp	9606	1	1	UP000005640_9606		3	4
TRUE	t4 / t3	t4	t3	12	P53677	31.696012496948242	35.59684753417969	0.1674481272522512	0.1674481272522512	12.307021388280393	1.123070213882804	0.00877701	0.0834675	4.95505	0.050869893917624046	P53677	AP3M2_HUMAN	AP-3 complex subunit mu-2	AP3M2	P53677	Homo sapiens	0.199	46977.3		protein binding		sp	9606	1	1	UP000005640_9606		6	6
TRUE	t4 / t3	t4	t3	12	P57772	139.186	151.37313842773438	0.12109727882673796	0.12109727882673796	8.756172108646654	1.0875617210864665	0.00880124	0.0835018	5.2266035079956055	0.0390649	P57772	SELB_HUMAN	Selenocysteine-specific elongation factor	EEFSEC	P57772	Homo sapiens	0.289	65304.7				sp	9606	1	4	UP000005640_9606		18	25
TRUE	t4 / t3	t4	t3	12	O60566	48.34096145629883	56.65005111694336	0.22883109059336482	0.22883109059336482	17.188507241743856	1.1718850724174386	0.00883228	0.083511	7.0437469482421875	0.0431086	O60566	BUB1B_HUMAN	Mitotic checkpoint serine/threonine-protein kinase BUB1 beta	BUB1B	O60566	Homo sapiens	0.243	119545			cytosol	sp	9606	1	3	UP000005640_9606		26	28
TRUE	t4 / t3	t4	t3	12	Q13029	74.54918670654297	88.1677	0.242058	0.242058	18.267855766744102	1.182678557667441	0.00881343	0.083511	5.479869365692139	0.043103828815821345	Q13029	PRDM2_HUMAN	PR domain zinc finger protein 2	PRDM2	Q13029	Homo sapiens	0.073	188915			nucleoplasm,Golgi apparatus	sp	9606	1	3	UP000005640_9606		12	15
TRUE	t4 / t3	t4	t3	12	Q9HD45	242.23977661132812	266.5820617675781	0.1381439251344768	0.1381439251344768	10.048839004383247	1.1004883900438325	0.00884297	0.083511	6.625427722930908	0.0351154	Q9HD45	TM9S3_HUMAN	Transmembrane 9 superfamily member 3	TM9SF3	Q9HD45	Homo sapiens	0.199	67888.3				sp	9606	1	2	UP000005640_9606		13	24
TRUE	t4 / t3	t4	t3	12	Q9Y530	122.60808563232422	139.85006713867188	0.18982682287827726	0.18982682287827726	14.06267899659792	1.1406267899659792	0.00884348	0.083511	4.964175701141357	0.0499093	Q9Y530	OARD1_HUMAN	ADP-ribose glycohydrolase OARD1	OARD1	Q9Y530	Homo sapiens	0.487	17024.7				sp	9606	1	2	UP000005640_9606		9	11
TRUE	t4 / t3	t4	t3	12	O43719	488.011	557.3118896484375	0.19156986182556637	0.19156986182556637	14.20057081537549	1.142005708153755	0.00890932	0.0835481	7.918529510498047	0.059294432297161165	O43719	HTSF1_HUMAN	HIV Tat-specific factor 1	HTATSF1	O43719	Homo sapiens	0.376	85852.8				sp	9606	1	1	UP000005640_9606		30	36
TRUE	t4 / t3	t4	t3	12	Q9BV38	356.29656982421875	376.773	0.0806177	0.0806177	5.74707	1.0574707287955607	0.00889541	0.0835481	5.741382122039795	0.032245503668835905	Q9BV38	WDR18_HUMAN	WD repeat-containing protein 18	WDR18	Q9BV38	Homo sapiens	0.278	47405.2				sp	9606	1	2	UP000005640_9606		11	13
TRUE	t4 / t3	t4	t3	12	Q9NW68	34.844329833984375	40.21445846557617	0.2067903850337476	0.2067903850337476	15.411771892809378	1.1541177189280938	0.00886936	0.0835481	3.909961223602295	0.057036	Q9NW68	BSDC1_HUMAN	BSD domain-containing protein 1	BSDC1	Q9NW68	Homo sapiens	0.353	47163.2				sp	9606	1	1	UP000005640_9606		11	14
TRUE	t4 / t3	t4	t3	12	O43823	165.92703247070312	183.50274658203125	0.14525271062928471	0.14525271062928471	10.592435632470787	1.1059243563247079	0.00893979	0.08364	6.933950424194336	0.0477842	O43823	AKAP8_HUMAN	A-kinase anchor protein 8	AKAP8	O43823	Homo sapiens	0.218	76108.3				sp	9606	1	1	UP000005640_9606		13	16
TRUE	t4 / t3	t4	t3	12	Q9P2E9	1256.49	1355.7088623046875	0.10964457153605499	0.10964457153605499	7.896238601203587	1.0789623860120359	0.00893261	0.08364	4.732268810272217	0.031478824656752454	Q9P2E9	RRBP1_HUMAN	Ribosome-binding protein 1	RRBP1	Q9P2E9	Homo sapiens	0.402	152456			endoplasmic reticulum	sp	9606	1	5	UP000005640_9606		58	75
TRUE	t4 / t3	t4	t3	12	Q9H6K1	22.92996597290039	18.327899932861328	-0.323193	0.3231927271085782	-20.0701	0.7992990462577232	0.00898315	0.0836998	6.008448600769043	0.0840916	Q9H6K1	ILRUN_HUMAN	Protein ILRUN	ILRUN	Q9H6K1	Homo sapiens	0.081	32871.6			centrosome,cytosol,nuclear speck	sp	9606	1	2	UP000005640_9606		3	3
TRUE	t4 / t3	t4	t3	12	Q9Y5K5	459.312	523.8043823242188	0.18955361705604487	0.18955361705604487	14.041080781697325	1.1404108078169732	0.00903083	0.0837713	3.8274662494659424	0.0499771	Q9Y5K5	UCHL5_HUMAN	Ubiquitin carboxyl-terminal hydrolase isozyme L5	UCHL5	Q9Y5K5	Homo sapiens	0.419	37606.9		protein binding	nucleoplasm,nucleolus,cytosol	sp	9606	1	3	UP000005640_9606		14	21
TRUE	t4 / t3	t4	t3	12	Q14728	210.07752990722656	253.99386596679688	0.27387179764410846	0.27387179764410846	20.904823128377625	1.2090482312837763	0.00910048	0.0840428	5.6920857429504395	0.0700583	Q14728	MFS10_HUMAN	Major facilitator superfamily domain-containing protein 10	MFSD10	Q14728	Homo sapiens	0.218	48339.2				sp	9606	1	1	UP000005640_9606		11	11
TRUE	t4 / t3	t4	t3	12	Q53HC5	10.64263916015625	14.900019645690918	0.4854582783660284	0.4854582783660284	40.00305207634385	1.4000305207634385	0.0090996	0.0840428	6.092154026031494	0.1090400620617446	Q53HC5	KLH26_HUMAN	Kelch-like protein 26	KLHL26	Q53HC5	Homo sapiens	0.093	68139.5				sp	9606	1	2	UP000005640_9606		5	5
TRUE	t4 / t3	t4	t3	12	P47756	3188.716552734375	3520.622314453125	0.14285460486196908	0.14285460486196908	10.40875713566123	1.1040875713566123	0.00915819	0.0841369	4.8198347091674805	0.0449616	P47756	CAPZB_HUMAN	F-actin-capping protein subunit beta	CAPZB	P47756	Homo sapiens	0.438	30628.7				sp	9606	1	5	UP000005640_9606		15	23
TRUE	t4 / t3	t4	t3	12	O60238	19.3303	25.353057861328125	0.3912945002293727	0.3912945002293727	31.156972024597195	1.311569720245972	0.00921631	0.084262	6.772606372833252	0.0611452	O60238	BNI3L_HUMAN	BCL2/adenovirus E1B 19 kDa protein-interacting protein 3-like	BNIP3L	O60238	Homo sapiens	0.164	23930.4			mitochondrion,nuclear speck	sp	9606	1	1	UP000005640_9606		3	5
TRUE	t4 / t3	t4	t3	12	P24298	8.03395	13.202702522277832	0.7166520817878881	0.7166520817878881	64.33640155523261	1.6433640155523261	0.00922136	0.084262	4.395663261413574	0.0979744	P24298	ALAT1_HUMAN	Alanine aminotransferase 1	GPT	P24298	Homo sapiens	0.04	54636.9				sp	9606	1	3	UP000005640_9606		2	2
TRUE	t4 / t3	t4	t3	12	Q53H47	101.43101501464844	107.88636016845703	0.0890136	0.0890136	6.3642714734505335	1.0636427147345053	0.00920141	0.084262	4.355623245239258	0.022394478574628156	Q53H47	SETMR_HUMAN	Histone-lysine N-methyltransferase SETMAR	SETMAR	Q53H47	Homo sapiens	0.276	78033.9			nucleolus	sp	9606	1	2	UP000005640_9606		20	24
TRUE	t4 / t3	t4	t3	12	O94905	454.92047119140625	519.926	0.19269269330101635	0.19269269330101635	14.289486285283658	1.1428948628528366	0.00938499	0.0849898	5.464765548706055	0.059152	O94905	ERLN2_HUMAN	Erlin-2	ERLIN2	O94905	Homo sapiens	0.496	37839.5			endoplasmic reticulum,cytosol,plasma membrane	sp	9606	1	1	UP000005640_9606		15	25
TRUE	t4 / t3	t4	t3	12	P41162	16.367589950561523	12.846150398254395	-0.349506	0.349506	-21.5147	0.7848528975283671	0.00937433	0.0849898	5.924491882324219	0.039346856514244466	P41162	ETV3_HUMAN	ETS translocation variant 3	ETV3	P41162	Homo sapiens	0.141	57001.3			nucleoplasm,intracellular membrane-bounded organelle	sp	9606	1	2	UP000005640_9606		5	5
TRUE	t4 / t3	t4	t3	12	Q9Y5J1	258.5591125488281	284.8201599121094	0.13955711414589736	0.13955711414589736	10.156689936163787	1.1015668993616379	0.0093804	0.0849898	4.592567443847656	0.035100708020661876	Q9Y5J1	UTP18_HUMAN	U3 small nucleolar RNA-associated protein 18 homolog	UTP18	Q9Y5J1	Homo sapiens	0.318	62003.6				sp	9606	1	3	UP000005640_9606		16	21
TRUE	t4 / t3	t4	t3	12	P11387	968.592	1062.4366455078125	0.13341612427639746	0.13341612427639746	9.688792423762749	1.0968879242376275	0.00944836	0.0851454	5.125918388366699	0.0353749	P11387	TOP1_HUMAN	DNA topoisomerase 1	TOP1	P11387	Homo sapiens	0.407	90725.7				sp	9606	1	2	UP000005640_9606		41	57
TRUE	t4 / t3	t4	t3	12	Q5T8I3	112.62091064453125	136.19131469726562	0.2741599799904895	0.2741599799904895	20.92897661530224	1.2092897661530224	0.00943186	0.0851454	5.767989635467529	0.062556	Q5T8I3	F102B_HUMAN	Protein FAM102B	FAM102B	Q5T8I3	Homo sapiens	0.247	39308.4				sp	9606	1	2	UP000005640_9606		7	8
TRUE	t4 / t3	t4	t3	12	P22087	1434.286376953125	1675.7674560546875	0.2244888534490175	0.2244888534490175	16.836322437541675	1.1683632243754167	0.00954944	0.0853964	4.817342281341553	0.0526283	P22087	FBRL_HUMAN	rRNA 2'-O-methyltransferase fibrillarin	FBL	P22087	Homo sapiens	0.467	33784.2				sp	9606	1	2	UP000005640_9606		13	19
TRUE	t4 / t3	t4	t3	12	P46782	2815.05	3078.87	0.12924226994621207	0.12924226994621207	9.371910892512814	1.0937191089251281	0.0095719	0.0854566	6.871705055236816	0.0741949	P46782	RS5_HUMAN	40S ribosomal protein S5	RPS5	P46782	Homo sapiens	0.368	22876.4				sp	9606	1	4	UP000005640_9606		9	14
TRUE	t4 / t3	t4	t3	12	Q8WZ60	14.28792667388916	13.024736404418945	-0.133542	0.13354240620222438	-8.84096	0.91159	0.00958528	0.0854566	7.608391284942627	0.018278386826772103	Q8WZ60	KLHL6_HUMAN	Kelch-like protein 6	KLHL6	Q8WZ60	Homo sapiens	0.111	70358.9				sp	9606	1	3	UP000005640_9606		6	6
TRUE	t4 / t3	t4	t3	12	Q9BU23	75.88031768798828	84.2615	0.15114705308492615	0.15114705308492615	11.045201560258944	1.1104520156025894	0.00959482	0.0854566	3.9292423725128174	0.0415313	Q9BU23	LMF2_HUMAN	Lipase maturation factor 2	LMF2	Q9BU23	Homo sapiens	0.13	79697.9		protein binding		sp	9606	1	2	UP000005640_9606		10	13
TRUE	t4 / t3	t4	t3	12	Q9Y2U5	87.355	105.0208969116211	0.26571417928601093	0.26571417928601093	20.22310443112736	1.2022310443112736	0.00959839	0.0854566	4.106114387512207	0.0490456	Q9Y2U5	M3K2_HUMAN	Mitogen-activated protein kinase kinase kinase 2	MAP3K2	Q9Y2U5	Homo sapiens	0.15	69740.9				sp	9606	1	2	UP000005640_9606		9	10
TRUE	t4 / t3	t4	t3	12	P06733	12905.7	14302.9	0.1483062474986702	0.1483062474986702	10.82675799435735	1.1082675799435735	0.00963325	0.0856414	5.334619998931885	0.054441070988088924	P06733	ENOA_HUMAN	Alpha-enolase	ENO1	P06733	Homo sapiens	0.569	47169			cytosol,plasma membrane	sp	9606	1	2	UP000005640_9606		22	49
TRUE	t4 / t3	t4	t3	12	Q8TEP8	75.65446472167969	77.0711	0.026764154362908556	0.026764154362908556	1.8724646239853149	1.0187246462398531	0.00976852	0.0860878	4.084984302520752	0.0210918	Q8TEP8	CE192_HUMAN	Centrosomal protein of 192 kDa	CEP192	Q8TEP8	Homo sapiens	0.144	279111		protein binding		sp	9606	1	3	UP000005640_9606		36	37
TRUE	t4 / t3	t4	t3	12	P61769	2160.194091796875	2600.433837890625	0.2675913890503679	0.2675913890503679	20.379638467002437	1.2037963846700244	0.00982754	0.0862574	6.4360761642456055	0.0564252	P61769	B2MG_HUMAN	Beta-2-microglobulin	B2M	P61769	Homo sapiens	0.193	13714.6	regulation of membrane depolarization,antibacterial humoral response,innate immune response,defense response to Gram-negative bacterium,defense response to Gram-positive bacterium,Requires Ontology,cellular response to lipopolysaccharide			sp	9606	1	1	UP000005640_9606		3	3
TRUE	t4 / t3	t4	t3	12	Q86VZ1	41.548126220703125	43.6462	0.071074	0.071074	5.049840280465889	1.050498402804659	0.00983584	0.0862574	7.803048610687256	0.0686576	Q86VZ1	P2RY8_HUMAN	P2Y purinoceptor 8	P2RY8	Q86VZ1	Homo sapiens	0.086	40635				sp	9606	1	1	UP000005640_9606		3	6
TRUE	t4 / t3	t4	t3	12	Q8NEC7	44.00741195678711	38.1653	-0.205485	0.20548520100400142	-13.2753	0.8672469693217371	0.00981312	0.0862574	7.014278888702393	0.0359141	Q8NEC7	GSTCD_HUMAN	Glutathione S-transferase C-terminal domain-containing protein	GSTCD	Q8NEC7	Homo sapiens	0.123	71078.8				sp	9606	1	2	UP000005640_9606		8	9
TRUE	t4 / t3	t4	t3	12	Q99856	97.79135131835938	107.59584045410156	0.13784352207957867	0.13784352207957867	10.025926632124872	1.1002592663212487	0.00982384	0.0862574	6.094177722930908	0.0355529	Q99856	ARI3A_HUMAN	AT-rich interactive domain-containing protein 3A	ARID3A	Q99856	Homo sapiens	0.197	62888.9				sp	9606	1	2	UP000005640_9606		13	14
TRUE	t4 / t3	t4	t3	12	O00566	97.53205108642578	105.214	0.10937321482851596	0.10937321482851596	7.875946291381042	1.0787594629138104	0.00989127	0.0863548	4.758988857269287	0.028488852309047026	O00566	MPP10_HUMAN	U3 small nucleolar ribonucleoprotein protein MPP10	MPHOSPH10	O00566	Homo sapiens	0.247	78863.8				sp	9606	1	2	UP000005640_9606		19	25
TRUE	t4 / t3	t4	t3	12	Q56A73	14.434310913085938	15.629976272583008	0.11481335256031665	0.11481335256031665	8.283494561649608	1.082834945616496	0.0100213	0.0867168	6.652835845947266	0.058992	Q56A73	SPIN4_HUMAN	Spindlin-4	SPIN4	Q56A73	Homo sapiens	0.137	28659.9				sp	9606	1	1	UP000005640_9606		6	7
TRUE	t4 / t3	t4	t3	12	Q8NA58	28.111717224121094	20.068601608276367	-0.486231	0.48623149207552613	-28.6113	0.7138874316456421	0.0100131	0.0867168	5.80892	0.0929738	Q8NA58	PNDC1_HUMAN	Poly(A)-specific ribonuclease PNLDC1	PNLDC1	Q8NA58	Homo sapiens	0.019	60123.5				sp	9606	1	2	UP000005640_9606		2	2
TRUE	t4 / t3	t4	t3	12	Q9BPX6	84.13349914550781	93.73831939697266	0.15595858166616192	0.15595858166616192	11.416166389149506	1.114161663891495	0.010050943008620302	0.0868402	5.938112258911133	0.044128314757766324	Q9BPX6	MICU1_HUMAN	Calcium uptake protein 1, mitochondrial	MICU1	Q9BPX6	Homo sapiens	0.261	54351.3		protein binding	mitochondrion	sp	9606	1	1	UP000005640_9606		17	20
TRUE	t4 / t3	t4	t3	12	Q14764	266.90643310546875	281.37823486328125	0.0761767	0.0761767	5.42205	1.054220505626007	0.010089905922801031	0.0870873	7.788608551025391	0.028357751513181127	Q14764	MVP_HUMAN	Major vault protein	MVP	Q14764	Homo sapiens	0.417	99326.9				sp	9606	1	4	UP000005640_9606		35	45
TRUE	t4 / t3	t4	t3	12	P24928	339.81842041015625	360.6668701171875	0.0859028	0.0859028	6.135173508801395	1.061351735088014	0.010109086137215083	0.0871909	4.176122188568115	0.028452453371726028	P24928	RPB1_HUMAN	DNA-directed RNA polymerase II subunit RPB1	POLR2A	P24928	Homo sapiens	0.387	217176	transcription from RNA polymerase II promoter	RNA polymerase II activity	nucleus	sp	9606	1	2	UP000005640_9606		75	101
TRUE	t4 / t3	t4	t3	12	Q9UBC3	44.14118576049805	52.84609603881836	0.25967151253544846	0.25967151253544846	19.720608153916743	1.1972060815391674	0.0101236	0.0871923	5.6709089279174805	0.0650417	Q9UBC3	DNM3B_HUMAN	DNA (cytosine-5)-methyltransferase 3B	DNMT3B	Q9UBC3	Homo sapiens	0.193	95751		protein binding	nucleoplasm	sp	9606	1	1	UP000005640_9606		14	15
TRUE	t4 / t3	t4	t3	12	O75592	424.0245666503906	437.7781677246094	0.0460522	0.0460522	3.2435859042003745	1.0324358590420037	0.010143583278097307	0.0873024	5.435304164886475	0.0226899	O75592	MYCB2_HUMAN	E3 ubiquitin-protein ligase MYCBP2	MYCBP2	O75592	Homo sapiens	0.255	513636			nucleoplasm,cytosol,intracellular membrane-bounded organelle	sp	9606	1	4	UP000005640_9606		108	126
TRUE	t4 / t3	t4	t3	12	O60496	35.071746826171875	41.48344421386719	0.24222639164225981	0.24222639164225981	18.28165964893045	1.1828165964893045	0.010266812209935049	0.0876046	5.22665	0.0490165	O60496	DOK2_HUMAN	Docking protein 2	DOK2	O60496	Homo sapiens	0.201	45378.9				sp	9606	1	2	UP000005640_9606		7	8
TRUE	t4 / t3	t4	t3	12	Q3L8U1	24.047801971435547	21.893651962280273	-0.135392	0.1353924113384763	-8.95778	0.910422	0.010358160696112263	0.0880262	4.52814	0.0280311	Q3L8U1	CHD9_HUMAN	Chromodomain-helicase-DNA-binding protein 9	CHD9	Q3L8U1	Homo sapiens	0.098	326022		protein binding	nucleoplasm,cytosol	sp	9606	1	2	UP000005640_9606		25	26
TRUE	t4 / t3	t4	t3	12	P62312	589.3856201171875	774.3330688476562	0.393742	0.393742	31.37970157699057	1.3137970157699057	0.0103697	0.0880623	5.566983699798584	0.0836175	P62312	LSM6_HUMAN	U6 snRNA-associated Sm-like protein LSm6	LSM6	P62312	Homo sapiens	0.562	9127.57				sp	9606	1	1	UP000005640_9606		5	6
TRUE	t4 / t3	t4	t3	12	P20231;Q15661	370.4223327636719	411.843	0.15292344804265542	0.15292344804265542	11.182016080245184	1.1118201608024518	0.010403386649240148	0.088128	4.74222	0.0388137	P20231;Q15661	TRYB2_HUMAN;TRYB1_HUMAN	Tryptase beta-2;Tryptase alpha/beta-1	TPSB2;TPSAB1	P20231;Q15661	Homo sapiens	30.2%;30.2%	30515.11;30515.11	;	;	;	sp	9606	1	2;1	UP000005640_9606		7	12
TRUE	t4 / t3	t4	t3	12	Q4KMQ2	46.711605072021484	52.671363830566406	0.17323779709413634	0.17323779709413634	12.758625505066611	1.1275862550506661	0.010429833685128832	0.0882428	2.9808475971221924	0.0258381	Q4KMQ2	ANO6_HUMAN	Anoctamin-6	ANO6	Q4KMQ2	Homo sapiens	0.146	106165			cytosol,plasma membrane	sp	9606	1	2	UP000005640_9606		14	17
TRUE	t4 / t3	t4	t3	12	Q8NDD1	36.10654067993164	41.35567855834961	0.19582523561006024	0.19582523561006024	14.537914127385477	1.1453791412738548	0.0104418	0.0882428	7.037088871002197	0.082575	Q8NDD1	CA131_HUMAN	Uncharacterized protein C1orf131	C1orf131	Q8NDD1	Homo sapiens	0.205	32610.2		protein binding		sp	9606	1	4	UP000005640_9606		8	9
TRUE	t4 / t3	t4	t3	12	Q13217	250.27972412109375	268.2905578613281	0.10025486281502649	0.10025486281502649	7.196281601908794	1.071962816019088	0.010475645557282687	0.088406	5.332485198974609	0.033678986494608744	Q13217	DNJC3_HUMAN	DnaJ homolog subfamily C member 3	DNAJC3	Q13217	Homo sapiens	0.339	57580.1				sp	9606	1	1	UP000005640_9606		21	29
TRUE	t4 / t3	t4	t3	12	P19388	315.85931396484375	395.6158142089844	0.3248179824347575	0.3248179824347575	25.250640623191444	1.2525064062319144	0.010505551381353078	0.0884106	5.998793601989746	0.0933037	P19388	RPAB1_HUMAN	DNA-directed RNA polymerases I, II, and III subunit RPABC1	POLR2E	P19388	Homo sapiens	0.452	24551.2				sp	9606	1	4	UP000005640_9606		8	11
TRUE	t4 / t3	t4	t3	12	P22392	5662.43	6109.62	0.10966102364528661	0.10966102364528661	7.897469028129844	1.0789746902812984	0.0105126	0.0884106	5.339993476867676	0.0394953	P22392	NDKB_HUMAN	Nucleoside diphosphate kinase B	NME2	P22392	Homo sapiens	0.678	17298				sp	9606	1	1	UP000005640_9606		13	23
TRUE	t4 / t3	t4	t3	12	P61106	1356.8468017578125	1467.702880859375	0.11330210234479028	0.11330210234479028	8.17012	1.0817012495131706	0.010496636351325242	0.0884106	4.642771244049072	0.0415574	P61106	RAB14_HUMAN	Ras-related protein Rab-14	RAB14	P61106	Homo sapiens	0.735	23896.9				sp	9606	1	4	UP000005640_9606		14	20
TRUE	t4 / t3	t4	t3	12	Q96HR9	9.440241813659668	11.454002380371094	0.2789560883049507	0.2789560883049507	21.331662964370167	1.2133166296437017	0.010678248440974323	0.0892475	6.574962139129639	0.10903783420295422	Q96HR9	REEP6_HUMAN	Receptor expression-enhancing protein 6	REEP6	Q96HR9	Homo sapiens	0.1	23418.3		protein binding	endoplasmic reticulum	sp	9606	1	2	UP000005640_9606		3	3
TRUE	t4 / t3	t4	t3	12	P06280	177.3614501953125	190.7986602783203	0.10535856972001176	0.10535856972001176	7.576172876468146	1.0757617287646815	0.010738079807006801	0.0894301	5.329343318939209	0.031514388321282186	P06280	AGAL_HUMAN	Alpha-galactosidase A	GLA	P06280	Homo sapiens	0.294	48766.8				sp	9606	1	1	UP000005640_9606		13	17
TRUE	t4 / t3	t4	t3	12	Q5SY16	190.80096435546875	215.53807067871094	0.17587425321306402	0.17587425321306402	12.964874892957102	1.129648748929571	0.010737636058448838	0.0894301	4.893104553222656	0.044371	Q5SY16	NOL9_HUMAN	Polynucleotide 5'-hydroxyl-kinase NOL9	NOL9	Q5SY16	Homo sapiens	0.212	79322.8				sp	9606	1	1	UP000005640_9606		17	20
TRUE	t4 / t3	t4	t3	12	Q96P47	32.43180465698242	38.57175827026367	0.2501356075331984	0.2501356075331984	18.931890094371752	1.1893189009437175	0.010761726959500492	0.089514	7.146412372589111	0.0577084	Q96P47	AGAP3_HUMAN	Arf-GAP with GTPase, ANK repeat and PH domain-containing protein 3	AGAP3	Q96P47	Homo sapiens	0.104	95044.1				sp	9606	1	2	UP000005640_9606		8	8
TRUE	t4 / t3	t4	t3	12	Q01432	168.09881591796875	186.03799438476562	0.14628772951428498	0.14628772951428498	10.67180537163992	1.1067180537163992	0.010781147319799126	0.0896141	6.819827556610107	0.0403244	Q01432	AMPD3_HUMAN	AMP deaminase 3	AMPD3	Q01432	Homo sapiens	0.3	88812.3		protein binding		sp	9606	1	1	UP000005640_9606		20	21
TRUE	t4 / t3	t4	t3	12	Q92890	246.71006774902344	252.9619903564453	0.036104	0.036104	2.53412	1.0253411734043294	0.010814748349662652	0.089648	7.062902927398682	0.0390068	Q92890	UFD1_HUMAN	Ubiquitin recognition factor in ER-associated degradation protein 1	UFD1	Q92890	Homo sapiens	0.498	34500.3				sp	9606	1	3	UP000005640_9606		15	17
TRUE	t4 / t3	t4	t3	12	P10321	628.574	841.7678833007812	0.4213393657614082	0.4213393657614082	33.917	1.339170233508374	0.0108366	0.089707	6.385778427124023	0.10955846022219544	P10321	HLAC_HUMAN	HLA class I histocompatibility antigen, C alpha chain	HLA-C	P10321	Homo sapiens	0.194	40648.5				sp	9606	1	3	UP000005640_9606		6	7
TRUE	t4 / t3	t4	t3	12	P35221	153.6188201904297	162.36822509765625	0.0799144	0.0799144	5.695529295421342	1.0569552929542134	0.010831335133589918	0.089707	3.5219504833221436	0.0263178	P35221	CTNA1_HUMAN	Catenin alpha-1	CTNNA1	P35221	Homo sapiens	0.368	100071		protein binding	plasma membrane,cell junction,intracellular membrane-bounded organelle	sp	9606	1	1	UP000005640_9606		30	34
TRUE	t4 / t3	t4	t3	12	O75131	477.5782165527344	502.8222351074219	0.0743114	0.0743114	5.285839613227017	1.0528583961322702	0.0108807	0.0898575	5.457630157470703	0.033623963905282384	O75131	CPNE3_HUMAN	Copine-3	CPNE3	O75131	Homo sapiens	0.233	60130.6				sp	9606	1	1	UP000005640_9606		15	21
TRUE	t4 / t3	t4	t3	12	P05107	845.299	961.239	0.1854341709514254	0.1854341709514254	13.715914338931757	1.1371591433893176	0.010884423278027444	0.0898575	3.8349497318267822	0.041815	P05107	ITB2_HUMAN	Integrin beta-2	ITGB2	P05107	Homo sapiens	0.202	84781.8				sp	9606	1	2	UP000005640_9606		14	22
TRUE	t4 / t3	t4	t3	12	Q96AE4	3040.135009765625	3348.801513671875	0.13950947488027182	0.13950947488027182	10.153052509666205	1.101530525096662	0.010884130842455523	0.0898575	3.8708646297454834	0.029704248504225726	Q96AE4	FUBP1_HUMAN	Far upstream element-binding protein 1	FUBP1	Q96AE4	Homo sapiens	0.444	67560.4		protein binding	nucleoplasm	sp	9606	1	3	UP000005640_9606		28	43
TRUE	t4 / t3	t4	t3	12	P33981	53.481483459472656	62.54954528808594	0.2259599133793851	0.2259599133793851	16.955516642474766	1.1695551664247477	0.0109063	0.0899399	5.127787113189697	0.0485787	P33981	TTK_HUMAN	Dual specificity protein kinase TTK	TTK	P33981	Homo sapiens	0.256	97072.3		protein binding		sp	9606	1	2	UP000005640_9606		24	24
TRUE	t4 / t3	t4	t3	12	P51957	20.288238525390625	18.548303604125977	-0.129356	0.12935636573338694	-8.57608	0.9142392318048149	0.0109257	0.0899537	5.805782794952393	0.0463046	P51957	NEK4_HUMAN	Serine/threonine-protein kinase Nek4	NEK4	P51957	Homo sapiens	0.09	94597.2			cytosol	sp	9606	1	2	UP000005640_9606		9	10
TRUE	t4 / t3	t4	t3	12	Q6ZT07	34.056724548339844	45.43455505371094	0.41585026189362595	0.41585026189362595	33.408469711235725	1.3340846971123572	0.010944043666284299	0.090009	4.235583782196045	0.13915336923921748	Q6ZT07	TBCD9_HUMAN	TBC1 domain family member 9	TBC1D9	Q6ZT07	Homo sapiens	0.022	143229				sp	9606	2	2	UP000005640_9606		3	3
TRUE	t4 / t3	t4	t3	12	Q96SZ5	42.61975860595703	49.57864761352539	0.21819649684079703	0.21819649684079703	16.32784707184076	1.1632784707184076	0.010947245825493957	0.090009	5.795434951782227	0.0456083	Q96SZ5	AEDO_HUMAN	2-aminoethanethiol dioxygenase	ADO	Q96SZ5	Homo sapiens	0.278	29750.8				sp	9606	1	2	UP000005640_9606		9	10
TRUE	t4 / t3	t4	t3	12	P04049	112.68146514892578	115.44991302490234	0.0350169	0.0350169	2.456879551856761	1.0245687955185676	0.0109938	0.0901742	3.131953716278076	0.020451723081964617	P04049	RAF1_HUMAN	RAF proto-oncogene serine/threonine-protein kinase	RAF1	P04049	Homo sapiens	0.25	73051.6			cytosol,plasma membrane	sp	9606	1	1	UP000005640_9606		16	21
TRUE	t4 / t3	t4	t3	12	Q8NFW8	252.3006591796875	314.2736511230469	0.31687734524295774	0.31687734524295774	24.563151021822136	1.2456315102182214	0.011007612406244031	0.0901742	4.764364242553711	0.0994369	Q8NFW8	NEUA_HUMAN	N-acylneuraminate cytidylyltransferase	CMAS	Q8NFW8	Homo sapiens	0.279	48379.2				sp	9606	1	2	UP000005640_9606		13	19
TRUE	t4 / t3	t4	t3	12	Q99805	426.99	472.8646545410156	0.14722423337642662	0.14722423337642662	10.743669637588681	1.1074366963758868	0.010987654137158971	0.0901742	6.105620384216309	0.0486344	Q99805	TM9S2_HUMAN	Transmembrane 9 superfamily member 2	TM9SF2	Q99805	Homo sapiens	0.161	75775.7				sp	9606	1	1	UP000005640_9606		12	18
TRUE	t4 / t3	t4	t3	12	Q96CB9	105.949	109.44087219238281	0.046778683402444565	0.046778683402444565	3.2955914952254473	1.0329559149522545	0.011053003591464612	0.0902841	4.595869541168213	0.035983107959777424	Q96CB9	NSUN4_HUMAN	5-methylcytosine rRNA methyltransferase NSUN4	NSUN4	Q96CB9	Homo sapiens	0.198	43088.6		protein binding		sp	9606	1	2	UP000005640_9606		7	10
TRUE	t4 / t3	t4	t3	12	P00338	11484.5	12714.8	0.14682319646576178	0.14682319646576178	10.712889655923629	1.1071288965592363	0.0111313	0.0903716	6.6925506591796875	0.0481347	P00338	LDHA_HUMAN	L-lactate dehydrogenase A chain	LDHA	P00338	Homo sapiens	0.53	36688.7	substantia nigra development	protein binding		sp	9606	1	2	UP000005640_9606		21	41
TRUE	t4 / t3	t4	t3	12	Q06945	5.745473384857178	8.383421897888184	0.545113	0.545113	45.91351027721417	1.4591351027721418	0.0110978	0.0903716	5.7501630783081055	0.0962608	Q06945	SOX4_HUMAN	Transcription factor SOX-4	SOX4	Q06945	Homo sapiens	0.103	47262.6				sp	9606	1	1	UP000005640_9606		3	4
TRUE	t4 / t3	t4	t3	12	Q7L5Y9	104.03129577636719	115.40357208251953	0.14967028017351677	0.14967028017351677	10.93159151895884	1.1093159151895884	0.011133408648101096	0.0903716	3.7709548473358154	0.036425258646134044	Q7L5Y9	MAEA_HUMAN	E3 ubiquitin-protein transferase MAEA	MAEA	Q7L5Y9	Homo sapiens	0.318	45287.3			nucleoplasm	sp	9606	1	1	UP000005640_9606		15	18
TRUE	t4 / t3	t4	t3	12	Q8N0U4	11.32128620147705	14.571756362915039	0.3641369079898152	0.3641369079898152	28.711138501329557	1.2871113850132956	0.011091588064113506	0.0903716	4.231191635131836	0.0464634	Q8N0U4	F185A_HUMAN	Protein FAM185A	FAM185A	Q8N0U4	Homo sapiens	0.235	42301.2				sp	9606	1	3	UP000005640_9606		7	9
TRUE	t4 / t3	t4	t3	12	Q96G03	774.2918701171875	833.4368286132812	0.10619535820740474	0.10619535820740474	7.6385870469158235	1.0763858704691582	0.011092897085386846	0.0903716	2.673123598098755	0.0224534	Q96G03	PGM2_HUMAN	Phosphopentomutase	PGM2	Q96G03	Homo sapiens	0.466	68283.4				sp	9606	1	4	UP000005640_9606		29	39
TRUE	t4 / t3	t4	t3	12	Q9UHA4	358.15960693359375	408.2564697265625	0.18887310860876755	0.18887310860876755	13.987301142604046	1.1398730114260405	0.011103372686136625	0.0903716	5.122741222381592	0.0605952	Q9UHA4	LTOR3_HUMAN	Ragulator complex protein LAMTOR3	LAMTOR3	Q9UHA4	Homo sapiens	0.492	13622.7				sp	9606	1	1	UP000005640_9606		6	9
TRUE	t4 / t3	t4	t3	12	Q9H501	236.58380126953125	255.89862060546875	0.11322107398267148	0.11322107398267148	8.164049792205684	1.0816404979220569	0.011162970130022208	0.0903976	6.007667541503906	0.0401679	Q9H501	ESF1_HUMAN	ESF1 homolog	ESF1	Q9H501	Homo sapiens	0.32	98796.1				sp	9606	1	1	UP000005640_9606		33	39
TRUE	t4 / t3	t4	t3	12	O43707	3383.9	3563.073486328125	0.0744347	0.0744347	5.294838699437099	1.052948386994371	0.011248130134921337	0.0907021	5.039773464202881	0.025512536907536507	O43707	ACTN4_HUMAN	Alpha-actinin-4	ACTN4	O43707	Homo sapiens	0.642	104854		protein binding		sp	9606	1	2	UP000005640_9606		60	103
TRUE	t4 / t3	t4	t3	12	P55010	227.75030517578125	239.42530822753906	0.0721227	0.0721227	5.126229377715585	1.0512622937771559	0.011244487189357662	0.0907021	3.7312588691711426	0.029457964934524638	P55010	IF5_HUMAN	Eukaryotic translation initiation factor 5	EIF5	P55010	Homo sapiens	0.346	49222.7				sp	9606	1	2	UP000005640_9606		20	28
TRUE	t4 / t3	t4	t3	12	P55809	473.4382629394531	545.7671508789062	0.2051092546478865	0.2051092546478865	15.277364252391035	1.1527736425239103	0.011259412683605786	0.0907328	4.630678653717041	0.058628	P55809	SCOT1_HUMAN	Succinyl-CoA:3-ketoacid coenzyme A transferase 1, mitochondrial	OXCT1	P55809	Homo sapiens	0.392	56157.6			mitochondrion	sp	9606	1	1	UP000005640_9606		16	24
TRUE	t4 / t3	t4	t3	12	Q8NC51	5889.71	6240.93	0.0835627	0.0835627	5.963156110990631	1.0596315611099063	0.011309070578667644	0.0908316	4.074132919311523	0.022558810607878108	Q8NC51	PAIRB_HUMAN	Plasminogen activator inhibitor 1 RNA-binding protein	SERBP1	Q8NC51	Homo sapiens	0.625	44965.4			cytosol	sp	9606	1	2	UP000005640_9606		36	53
TRUE	t4 / t3	t4	t3	12	P42330	639.1668090820312	718.9005737304688	0.1695997617335423	0.1695997617335423	12.474640972510876	1.1247464097251088	0.011347539621847145	0.0909388	7.1375298500061035	0.0382576	P42330	AK1C3_HUMAN	Aldo-keto reductase family 1 member C3	AKR1C3	P42330	Homo sapiens	0.502	36853.2				sp	9606	1	4	UP000005640_9606		18	24
TRUE	t4 / t3	t4	t3	12	Q14165	1257.1761474609375	1443.365966796875	0.19925033779410942	0.19925033779410942	14.81016162388833	1.1481016162388833	0.011352369654081746	0.0909388	5.018907070159912	0.0452496	Q14165	MLEC_HUMAN	Malectin	MLEC	Q14165	Homo sapiens	0.445	32233.9				sp	9606	1	1	UP000005640_9606		15	17
TRUE	t4 / t3	t4	t3	12	Q9UQE7	570.4292602539062	606.4678344726562	0.0883831	0.0883831	6.3178	1.0631779902081262	0.011396451611922218	0.0911716	2.4133474826812744	0.017879366413365152	Q9UQE7	SMC3_HUMAN	Structural maintenance of chromosomes protein 3	SMC3	Q9UQE7	Homo sapiens	0.544	141542				sp	9606	1	2	UP000005640_9606		71	94
TRUE	t4 / t3	t4	t3	12	P09382	4685.41	5360.4	0.1941638798404816	0.1941638798404816	14.406092296309026	1.1440609229630903	0.011413568061741654	0.0912484	4.165005207061768	0.057208	P09382	LEG1_HUMAN	Galectin-1	LGALS1	P09382	Homo sapiens	0.385	14715.7				sp	9606	1	2	UP000005640_9606		5	8
TRUE	t4 / t3	t4	t3	12	Q8TBP6	48.11817169189453	51.52208709716797	0.0986092	0.0986092	7.074074690678289	1.070740746906783	0.011493475161817444	0.0917061	6.495556831359863	0.0593674	Q8TBP6	S2540_HUMAN	Probable mitochondrial glutathione transporter SLC25A40	SLC25A40	Q8TBP6	Homo sapiens	0.207	38124.8				sp	9606	1	1	UP000005640_9606		10	11
TRUE	t4 / t3	t4	t3	12	Q06481	192.38258361816406	206.93983459472656	0.10523318356057819	0.10523318356057819	7.56682	1.0756682372321984	0.011665094277577198	0.0919456	5.973840713500977	0.0266004	Q06481	APLP2_HUMAN	Amyloid beta precursor like protein 2	APLP2	Q06481	Homo sapiens	0.269	86955.8		protein binding		sp	9606	1	2	UP000005640_9606		19	31
TRUE	t4 / t3	t4	t3	12	Q6NUM9	103.36199951171875	109.92237091064453	0.0887791	0.0887791	6.3469857683838615	1.0634698576838386	0.011622606959522292	0.0919456	3.7303848266601562	0.034613899622647944	Q6NUM9	RETST_HUMAN	All-trans-retinol 13,14-reductase	RETSAT	Q6NUM9	Homo sapiens	0.264	66819.5				sp	9606	1	2	UP000005640_9606		20	26
TRUE	t4 / t3	t4	t3	12	Q86VR2	148.48854064941406	160.252	0.10999034250020144	0.10999034250020144	7.9221012100588295	1.0792210121005883	0.0116537	0.0919456	5.186722755432129	0.036412907042951866	Q86VR2	RETR3_HUMAN	Reticulophagy regulator 3	RETREG3	Q86VR2	Homo sapiens	0.182	51396.2				sp	9606	1	1	UP000005640_9606		6	7
TRUE	t4 / t3	t4	t3	12	Q04446	382.919	403.861	0.0768183	0.0768183	5.4689477486185245	1.0546894774861852	0.011704953227657825	0.0920032	4.405745506286621	0.028868113965058555	Q04446	GLGB_HUMAN	1,4-alpha-glucan-branching enzyme	GBE1	Q04446	Homo sapiens	0.396	80473.9				sp	9606	1	3	UP000005640_9606		27	36
TRUE	t4 / t3	t4	t3	12	B2RUZ4	43.44796371459961	35.23324966430664	-0.302351	0.3023510186168074	-18.907	0.8109298262111047	0.011796234242893713	0.0921897	5.540978908538818	0.0434969	B2RUZ4	SMIM1_HUMAN	Small integral membrane protein 1	SMIM1	B2RUZ4	Homo sapiens	0.359	8749.12				sp	9606	1	1	UP000005640_9606		2	3
TRUE	t4 / t3	t4	t3	12	P60900	2537.73	3060.38	0.27017125916873125	0.27017125916873125	20.595097499339076	1.2059509749933908	0.011780739554252918	0.0921897	4.039408206939697	0.0497928	P60900	PSA6_HUMAN	Proteasome subunit alpha type-6	PSMA6	P60900	Homo sapiens	0.443	27399.5			nucleoplasm	sp	9606	1	1	UP000005640_9606		10	17
TRUE	t4 / t3	t4	t3	12	Q9UJX6	84.51736450195312	92.9072	0.1365433923772781	0.1365433923772781	9.926817995533433	1.0992681799553343	0.011812185028787352	0.0921897	4.050207138061523	0.030950442922382634	Q9UJX6	ANC2_HUMAN	Anaphase-promoting complex subunit 2	ANAPC2	Q9UJX6	Homo sapiens	0.232	93828.1				sp	9606	1	1	UP000005640_9606		22	26
TRUE	t4 / t3	t4	t3	12	Q9H0C8	219.71804809570312	243.67828369140625	0.14932430499597085	0.14932430499597085	10.90499201288495	1.1090499201288495	0.011832020550142245	0.0922852	5.154101371765137	0.0466305	Q9H0C8	ILKAP_HUMAN	Integrin-linked kinase-associated serine/threonine phosphatase 2C	ILKAP	Q9H0C8	Homo sapiens	0.324	42906.5				sp	9606	1	1	UP000005640_9606		14	20
TRUE	t4 / t3	t4	t3	12	P49407	353.4230041503906	398.9911804199219	0.1749609091183542	0.1749609091183542	12.893381510090052	1.1289338151009005	0.011862501805423748	0.0923521	5.589698791503906	0.0513027	P49407	ARRB1_HUMAN	Beta-arrestin-1	ARRB1	P49407	Homo sapiens	0.455	47065.7			nucleoplasm,nuclear body	sp	9606	1	2	UP000005640_9606		17	22
TRUE	t4 / t3	t4	t3	12	O95347	516.2361450195312	539.1874389648438	0.0627557	0.0627557	4.445890541903874	1.0444589054190387	0.011887232453039047	0.0923699	3.6217970848083496	0.027724480660836295	O95347	SMC2_HUMAN	Structural maintenance of chromosomes protein 2	SMC2	O95347	Homo sapiens	0.513	135656			nucleoplasm,nucleolus	sp	9606	1	2	UP000005640_9606		69	89
TRUE	t4 / t3	t4	t3	12	P20700	5479.41	5754.02	0.0705487	0.0705487	5.011602821961714	1.0501160282196171	0.0118885	0.0923699	3.875976085662842	0.0325517	P20700	LMNB1_HUMAN	Lamin-B1	LMNB1	P20700	Homo sapiens	0.573	66408.3				sp	9606	1	2	UP000005640_9606		42	66
TRUE	t4 / t3	t4	t3	12	P10153	1694.179931640625	2002.6668701171875	0.2413353533862684	0.2413353533862684	18.20862900777176	1.1820862900777176	0.011929978490126612	0.0925643	4.321082592010498	0.0588235	P10153	RNAS2_HUMAN	Non-secretory ribonuclease	RNASE2	P10153	Homo sapiens	0.093	18354.2				sp	9606	1	2	UP000005640_9606		2	6
TRUE	t4 / t3	t4	t3	12	P13051	195.92674255371094	233.95553588867188	0.2559200380879444	0.2559200380879444	19.4097	1.1941	0.011961616066153582	0.0925825	3.5170977115631104	0.0436013	P13051	UNG_HUMAN	Uracil-DNA glycosylase	UNG	P13051	Homo sapiens	0.403	34645.5	base-excision repair	uracil DNA N-glycosylase activity,protein binding	nucleoplasm,mitochondrion	sp	9606	1	2	UP000005640_9606		10	11
TRUE	t4 / t3	t4	t3	12	Q6UX71	53.9187	62.45981979370117	0.2121426625864296	0.2121426625864296	15.8407	1.158407350996826	0.011950033758057869	0.0925825	6.622940540313721	0.0611127	Q6UX71	PXDC2_HUMAN	Plexin domain-containing protein 2	PLXDC2	Q6UX71	Homo sapiens	0.212	59583.2				sp	9606	1	1	UP000005640_9606		11	12
TRUE	t4 / t3	t4	t3	12	Q9HCN4	135.0169677734375	144.59841918945312	0.0989111	0.0989111	7.096479482559248	1.0709647948255925	0.011958090305529582	0.0925825	4.95949	0.0375148	Q9HCN4	GPN1_HUMAN	GPN-loop GTPase 1	GPN1	Q9HCN4	Homo sapiens	0.321	41740.1			nucleoplasm,mitochondrion,cytosol	sp	9606	1	1	UP000005640_9606		8	9
TRUE	t4 / t3	t4	t3	12	Q5T1J5;Q9Y6H1	780.1331787109375	516.5462646484375	-0.594823	0.5948228611262633	-33.7874	0.6621257481984794	0.012034472509554875	0.0929095	5.083857536315918	0.1378061954907451	Q5T1J5;Q9Y6H1	CHCH9_HUMAN;CHCH2_HUMAN	Putative coiled-coil-helix-coiled-coil-helix domain-containing protein CHCHD2P9, mitochondrial;Coiled-coil-helix-coiled-coil-helix domain-containing protein 2	CHCHD2P9;CHCHD2	Q5T1J5;Q9Y6H1	Homo sapiens	15.9%;15.9%	15489.58;15512.57	;	;	;	sp	9606	5;1	1	UP000005640_9606		2	2
TRUE	t4 / t3	t4	t3	12	Q9Y6I9	270.9253234863281	332.831	0.29689480086464676	0.29689480086464676	22.849739701167458	1.2284973970116746	0.012027877654882337	0.0929095	7.444845676422119	0.0862818	Q9Y6I9	TX264_HUMAN	Testis-expressed protein 264	TEX264	Q9Y6I9	Homo sapiens	0.265	34188.6				sp	9606	1	1	UP000005640_9606		8	11
TRUE	t4 / t3	t4	t3	12	O43395	383.747	407.23345947265625	0.0857004	0.0857004	6.12028	1.0612027842741063	0.0121769	0.0932981	6.370672702789307	0.0309967	O43395	PRPF3_HUMAN	U4/U6 small nuclear ribonucleoprotein Prp3	PRPF3	O43395	Homo sapiens	0.408	77528.9			nucleoplasm,cytosol,nuclear speck	sp	9606	1	2	UP000005640_9606		30	42
TRUE	t4 / t3	t4	t3	12	Q14209	7.070178031921387	9.25735	0.38885286819577775	0.38885286819577775	30.935188333794873	1.3093518833379487	0.0121782	0.0932981	5.862378120422363	0.18633656340597424	Q14209	E2F2_HUMAN	Transcription factor E2F2	E2F2	Q14209	Homo sapiens	0.021	47505.9				sp	9606	1	1	UP000005640_9606		1	1
TRUE	t4 / t3	t4	t3	12	Q9H867	32.59278869628906	42.68301010131836	0.38910912494927846	0.38910912494927846	30.958447584996442	1.3095844758499644	0.0121669	0.0932981	3.367133378982544	0.1040672244456098	Q9H867	MT21D_HUMAN	Protein N-lysine methyltransferase METTL21D	VCPKMT	Q9H867	Homo sapiens	0.118	25806.6			cytosol	sp	9606	1	2	UP000005640_9606		2	2
TRUE	t4 / t3	t4	t3	12	Q96ES7	24.604028701782227	20.067001342773438	-0.29407	0.29406951639235396	-18.4402	0.8155981927187338	0.012291055921038397	0.0935069	7.263313293457031	0.0434346	Q96ES7	SGF29_HUMAN	SAGA-associated factor 29	SGF29	Q96ES7	Homo sapiens	0.242	33238				sp	9606	1	1	UP000005640_9606		7	9
TRUE	t4 / t3	t4	t3	12	Q96II8	66.64884948730469	55.63446044921875	-0.260601	0.26060119411737837	-16.526	0.8347399974221016	0.0123014	0.0935069	4.925442695617676	0.0384585	Q96II8	LRCH3_HUMAN	DISP complex protein LRCH3	LRCH3	Q96II8	Homo sapiens	0.225	86083.4		protein binding	cytosol	sp	9606	1	2	UP000005640_9606		16	22
TRUE	t4 / t3	t4	t3	12	P02749	23.030664443969727	58.275421142578125	1.3393314913392795	1.3393314913392795	153.0340420023651	2.5303404200236512	0.0122445	0.0935069	3.281350612640381	0.24473172983151015	P02749	APOH_HUMAN	Beta-2-glycoprotein 1	APOH	P02749	Homo sapiens	0.026	38298.2		protein binding,identical protein binding		sp	9606	1	3	UP000005640_9606		1	1
TRUE	t4 / t3	t4	t3	12	Q9H6B1	3.917489767074585	6.2191948890686035	0.6667983209636354	0.6667983209636354	58.75459181385008	1.5875459181385008	0.012344978486175521	0.093523	6.233880996704102	0.114188	Q9H6B1	Z385D_HUMAN	Zinc finger protein 385D	ZNF385D	Q9H6B1	Homo sapiens	0.043	42295.8				sp	9606	2	1	UP000005640_9606		1	2
TRUE	t4 / t3	t4	t3	12	Q14566	3961.86	4426.5	0.15999096653325678	0.15999096653325678	11.728014217612293	1.117280142176123	0.012390923827402547	0.0935445	5.5672197341918945	0.0552962	Q14566	MCM6_HUMAN	DNA replication licensing factor MCM6	MCM6	Q14566	Homo sapiens	0.382	92889.3				sp	9606	1	1	UP000005640_9606		38	62
TRUE	t4 / t3	t4	t3	12	Q9BV86	61.42643737792969	88.9537	0.5341951052753114	0.5341951052753114	44.8134	1.448133999959758	0.012408349449505576	0.0935445	4.219450950622559	0.10953017373612337	Q9BV86	NTM1A_HUMAN	N-terminal Xaa-Pro-Lys N-methyltransferase 1	NTMT1	Q9BV86	Homo sapiens	0.274	25387			nucleoplasm,cytosol	sp	9606	1	3	UP000005640_9606		7	8
TRUE	t4 / t3	t4	t3	12	P26038	11200.8	12084.8	0.10959356317328822	0.10959356317328822	7.892423856554687	1.0789242385655469	0.012444536754438542	0.0935795	5.216430187225342	0.048139605864786564	P26038	MOES_HUMAN	Moesin	MSN	P26038	Homo sapiens	0.549	67820				sp	9606	1	3	UP000005640_9606		41	78
TRUE	t4 / t3	t4	t3	12	Q14011	1130.2	1270.0052490234375	0.168257	0.168257	12.370034234147042	1.1237003423414704	0.012525953727706929	0.0938983	4.3922271728515625	0.041509592478679226	Q14011	CIRBP_HUMAN	Cold-inducible RNA-binding protein	CIRBP	Q14011	Homo sapiens	0.262	18648			nucleoplasm	sp	9606	1	1	UP000005640_9606		5	10
TRUE	t4 / t3	t4	t3	12	Q96BW1	51.27723693847656	58.06554412841797	0.17936380303828878	0.17936380303828878	13.238441841330406	1.132384418413304	0.012598504343503219	0.0941687	6.303462982177734	0.054185728714604205	Q96BW1	UPP_HUMAN	Uracil phosphoribosyltransferase homolog	UPRT	Q96BW1	Homo sapiens	0.139	33786.4			nucleoplasm,intracellular membrane-bounded organelle	sp	9606	1	1	UP000005640_9606		6	6
TRUE	t4 / t3	t4	t3	12	Q9Y2A7	96.94862365722656	107.32949829101562	0.14675431670725972	0.14675431670725972	10.707603926892117	1.1070760392689212	0.012595141239626536	0.0941687	5.4292168617248535	0.0570053	Q9Y2A7	NCKP1_HUMAN	Nck-associated protein 1	NCKAP1	Q9Y2A7	Homo sapiens	0.145	128790				sp	9606	1	1	UP000005640_9606		19	19
TRUE	t4 / t3	t4	t3	12	P42898	61.92957305908203	69.9076	0.1748211296456462	0.1748211296456462	12.88244405451957	1.1288244405451957	0.012763355129423769	0.094242	5.3083882331848145	0.053477815072727704	P42898	MTHR_HUMAN	Methylenetetrahydrofolate reductase	MTHFR	P42898	Homo sapiens	0.3	74596.6				sp	9606	1	3	UP000005640_9606		18	20
TRUE	t4 / t3	t4	t3	12	Q16134	267.44183349609375	324.0524597167969	0.27700223409962954	0.27700223409962954	21.167453677934045	1.2116745367793404	0.012683529976734583	0.094242	7.175948619842529	0.0952209	Q16134	ETFD_HUMAN	Electron transfer flavoprotein-ubiquinone oxidoreductase, mitochondrial	ETFDH	Q16134	Homo sapiens	0.266	68495.4				sp	9606	1	2	UP000005640_9606		16	19
TRUE	t4 / t3	t4	t3	12	Q8WYA6	343.7728271484375	371.9263916015625	0.11356160976592228	0.11356160976592228	8.189584001346507	1.081895840013465	0.0126602	0.094242	7.3058	0.044450922322801706	Q8WYA6	CTBL1_HUMAN	Beta-catenin-like protein 1	CTNNBL1	Q8WYA6	Homo sapiens	0.281	65173.3			nucleoplasm,centrosome,cytosol	sp	9606	1	1	UP000005640_9606		21	29
TRUE	t4 / t3	t4	t3	12	Q96FJ0	11.300758361816406	14.44727897644043	0.35437820776810647	0.35437820776810647	27.84344655360167	1.2784344655360167	0.012728047102974562	0.094242	6.033319473266602	0.0495758	Q96FJ0	STALP_HUMAN	AMSH-like protease	STAMBPL1	Q96FJ0	Homo sapiens	0.119	49783.1				sp	9606	1	2	UP000005640_9606		4	4
TRUE	t4 / t3	t4	t3	12	Q9C0J8	198.9263916015625	203.37396240234375	0.0319003	0.0319003	2.2357871999656442	1.0223578719996564	0.012763265658427864	0.094242	5.321772575378418	0.020865652122008582	Q9C0J8	WDR33_HUMAN	pre-mRNA 3' end processing protein WDR33	WDR33	Q9C0J8	Homo sapiens	0.296	145891			fibrillar center,nucleoplasm	sp	9606	1	2	UP000005640_9606		35	48
TRUE	t4 / t3	t4	t3	12	Q9P1U1	546.2269287109375	662.7611083984375	0.2789885060096383	0.2789885060096383	21.33438934666103	1.2133438934666103	0.012696524020925713	0.094242	7.724580764770508	0.10159526301965677	Q9P1U1	ARP3B_HUMAN	Actin-related protein 3B	ACTR3B	Q9P1U1	Homo sapiens	0.301	47607.7				sp	9606	2	1	UP000005640_9606		11	14
TRUE	t4 / t3	t4	t3	12	Q9NUQ6	47.16511535644531	52.773563385009766	0.16209520445853867	0.16209520445853867	11.891093631764083	1.1189109363176408	0.012823016295983997	0.094524	3.847352981567383	0.0336548	Q9NUQ6	SPS2L_HUMAN	SPATS2-like protein	SPATS2L	Q9NUQ6	Homo sapiens	0.258	61729			nucleoplasm,nucleolus,cytosol	sp	9606	1	2	UP000005640_9606		14	16
TRUE	t4 / t3	t4	t3	12	O95989	186.37757873535156	216.4689483642578	0.2159317768614864	0.2159317768614864	16.145380701417288	1.161453807014173	0.012858239855248888	0.0945815	5.794872283935547	0.0734373	O95989	NUDT3_HUMAN	Diphosphoinositol polyphosphate phosphohydrolase 1	NUDT3	O95989	Homo sapiens	0.372	19471				sp	9606	1	1	UP000005640_9606		6	7
TRUE	t4 / t3	t4	t3	12	Q5VWZ2	47.408912658691406	42.59100341796875	-0.15461	0.15460958538771213	-10.1625	0.8983754536745445	0.0128604	0.0945815	4.611233234405518	0.0331072	Q5VWZ2	LYPL1_HUMAN	Lysophospholipase-like protein 1	LYPLAL1	Q5VWZ2	Homo sapiens	0.376	26316.4			cytosol	sp	9606	1	3	UP000005640_9606		8	13
TRUE	t4 / t3	t4	t3	12	Q6PCE3	279.0208740234375	272.90179443359375	-0.0319912	0.031991175633149925	-2.19305	0.9780694558740084	0.012953789211263405	0.0947498	5.863687992095947	0.0284287	Q6PCE3	PGM2L_HUMAN	Glucose 1,6-bisphosphate synthase	PGM2L1	Q6PCE3	Homo sapiens	0.227	70441.7				sp	9606	1	3	UP000005640_9606		15	17
TRUE	t4 / t3	t4	t3	12	O43684	1531.3118896484375	1734.88	0.18006843765609726	0.18006843765609726	13.293762760067018	1.1329376276006702	0.013029427293785551	0.0949186	4.503693103790283	0.0557709	O43684	BUB3_HUMAN	Mitotic checkpoint protein BUB3	BUB3	O43684	Homo sapiens	0.335	37154.8			nucleoplasm	sp	9606	1	1	UP000005640_9606		11	16
TRUE	t4 / t3	t4	t3	12	P61758	228.1276397705078	256.48468017578125	0.1690314031945153	0.1690314031945153	12.430339626447772	1.1243033962644777	0.013045476031919837	0.0949786	6.379600524902344	0.0615176	P61758	PFD3_HUMAN	Prefoldin subunit 3	VBP1	P61758	Homo sapiens	0.604	22625.9			cytosol,intracellular membrane-bounded organelle	sp	9606	1	4	UP000005640_9606		14	17
TRUE	t4 / t3	t4	t3	12	O60271	189.00071716308594	202.8235321044922	0.10183333845552052	0.10183333845552052	7.313630947484051	1.0731363094748405	0.013136208515179595	0.095199	5.169054985046387	0.034206	O60271	JIP4_HUMAN	C-Jun-amino-terminal kinase-interacting protein 4	SPAG9	O60271	Homo sapiens	0.385	146205			cytosol,centriolar satellite	sp	9606	1	4	UP000005640_9606		46	55
TRUE	t4 / t3	t4	t3	12	P62324	18.127605438232422	21.833261489868164	0.2683392934684191	0.2683392934684191	20.442060393813776	1.2044206039381378	0.0131344	0.095199	7.2172651290893555	0.0961112	P62324	BTG1_HUMAN	Protein BTG1	BTG1	P62324	Homo sapiens	0.123	19209				sp	9606	1	1	UP000005640_9606		2	2
TRUE	t4 / t3	t4	t3	12	Q86WR0	164.12733459472656	179.11395263671875	0.12606219232881608	0.12606219232881608	9.131092074941737	1.0913109207494174	0.013131185943862875	0.095199	5.378986358642578	0.0269265	Q86WR0	CCD25_HUMAN	Coiled-coil domain-containing protein 25	CCDC25	Q86WR0	Homo sapiens	0.438	24478.8				sp	9606	1	2	UP000005640_9606		11	15
TRUE	t4 / t3	t4	t3	12	Q96CP6	31.5137	38.44308853149414	0.2867463849169894	0.2867463849169894	21.988604450728232	1.2198860445072823	0.013119346167372004	0.095199	3.8437652587890625	0.0499221	Q96CP6	ASTRA_HUMAN	Protein Aster-A	GRAMD1A	Q96CP6	Homo sapiens	0.16	80680.2			cytosol,plasma membrane	sp	9606	1	2	UP000005640_9606		8	8
TRUE	t4 / t3	t4	t3	12	O43148	181.1014862060547	199.1683349609375	0.13718991108598216	0.13718991108598216	9.976090828060125	1.0997609082806012	0.013167970509472535	0.0953009	6.379513740539551	0.058230953261477286	O43148	MCES_HUMAN	mRNA cap guanine-N7 methyltransferase	RNMT	O43148	Homo sapiens	0.288	54844.1			fibrillar center,nucleoplasm	sp	9606	1	1	UP000005640_9606		17	19
TRUE	t4 / t3	t4	t3	12	P20701	97.19336700439453	104.91822814941406	0.11033558373227118	0.11033558373227118	7.947930381576618	1.0794793038157662	0.013173	0.0953009	7.430150508880615	0.035233668391054074	P20701	ITAL_HUMAN	Integrin alpha-L	ITGAL	P20701	Homo sapiens	0.142	128770				sp	9606	1	3	UP000005640_9606		17	18
TRUE	t4 / t3	t4	t3	12	Q7L0J3	168.768	182.7809295654297	0.11507151866726868	0.11507151866726868	8.302873313804193	1.083028733138042	0.013209862177681735	0.0953071	5.386946201324463	0.0473595	Q7L0J3	SV2A_HUMAN	Synaptic vesicle glycoprotein 2A	SV2A	Q7L0J3	Homo sapiens	0.133	82695.3				sp	9606	1	1	UP000005640_9606		10	11
TRUE	t4 / t3	t4	t3	12	Q9BRP8	905.4000854492188	960.3865966796875	0.0850598	0.0850598	6.073172745857081	1.0607317274585708	0.0132034	0.0953071	7.158429145812988	0.0363375	Q9BRP8	PYM1_HUMAN	Partner of Y14 and mago	PYM1	Q9BRP8	Homo sapiens	0.716	22655.5			nucleoplasm,nucleolus,cytosol,cell junction	sp	9606	1	1	UP000005640_9606		12	17
TRUE	t4 / t3	t4	t3	12	Q32P41	110.56268310546875	114.12872314453125	0.0457974	0.0457974	3.2253559147626287	1.0322535591476263	0.013262538675375907	0.0954149	6.007178783416748	0.029678637066303762	Q32P41	TRM5_HUMAN	tRNA (guanine(37)-N1)-methyltransferase	TRMT5	Q32P41	Homo sapiens	0.354	58246.2				sp	9606	1	2	UP000005640_9606		22	26
TRUE	t4 / t3	t4	t3	12	P17861	13.02481746673584	16.404254913330078	0.3328069133271752	0.3328069133271752	25.94614055225728	1.2594614055225728	0.013310068482617858	0.0954432	5.390448570251465	0.0950126	P17861	XBP1_HUMAN	X-box-binding protein 1	XBP1	P17861	Homo sapiens	0.092	28694.9	positive regulation of protein kinase B signaling,positive regulation of vascular smooth muscle cell proliferation,positive regulation of vascular associated smooth muscle cell migration,negative regulation of transcription from RNA polymerase II promoter,regulation of cell growth,positive regulation of protein phosphorylation,endothelial cell proliferation,positive regulation of transcription fr…	transcription regulatory region sequence-specific DNA binding,RNA polymerase II regulatory region sequence-specific DNA binding,protease binding,protein binding,protein kinase binding,estrogen receptor binding,chromatin DNA binding,ubiquitin protein ligase binding	nucleus,cytoplasm,endoplasmic reticulum membrane,cytosol	sp	9606	1	2	UP000005640_9606		4	4
TRUE	t4 / t3	t4	t3	12	Q969U7	112.13447570800781	153.32284545898438	0.451343	0.451343	36.73122783240088	1.3673122783240088	0.013291682285384661	0.0954432	6.115240573883057	0.1424559977359914	Q969U7	PSMG2_HUMAN	Proteasome assembly chaperone 2	PSMG2	Q969U7	Homo sapiens	0.265	29396.1				sp	9606	1	1	UP000005640_9606		7	10
TRUE	t4 / t3	t4	t3	12	Q9GZN2	25.104286193847656	29.943689346313477	0.2543182815272782	0.2543182815272782	19.27719878230125	1.1927719878230125	0.0132988	0.0954432	5.282980918884277	0.0734753	Q9GZN2	TGIF2_HUMAN	Homeobox protein TGIF2	TGIF2	Q9GZN2	Homo sapiens	0.101	25878.5			nucleoplasm,centrosome	sp	9606	1	1	UP000005640_9606		3	3
TRUE	t4 / t3	t4	t3	12	O15554	36.917869567871094	33.852256774902344	-0.125067	0.12506728641296377	-8.30387	0.916961	0.0133512	0.0954871	5.318356037139893	0.0363669	O15554	KCNN4_HUMAN	Intermediate conductance calcium-activated potassium channel protein 4	KCNN4	O15554	Homo sapiens	0.18	47695.5				sp	9606	1	1	UP000005640_9606		8	10
TRUE	t4 / t3	t4	t3	12	Q6ZXV5	50.89632797241211	56.225284576416016	0.143657	0.143657	10.470218218674665	1.1047021821867467	0.0133306	0.0954871	4.223418712615967	0.0532329	Q6ZXV5	TMTC3_HUMAN	Protein O-mannosyl-transferase TMTC3	TMTC3	Q6ZXV5	Homo sapiens	0.117	104009				sp	9606	1	2	UP000005640_9606		9	9
TRUE	t4 / t3	t4	t3	12	Q9Y3B9	131.31033325195312	143.19253540039062	0.12497583591936123	0.12497583591936123	9.048946761591402	1.090489467615914	0.013340164764457466	0.0954871	4.998808860778809	0.0506475	Q9Y3B9	RRP15_HUMAN	RRP15-like protein	RRP15	Q9Y3B9	Homo sapiens	0.337	31484.2				sp	9606	1	2	UP000005640_9606		13	18
TRUE	t4 / t3	t4	t3	12	P51659	2134.519775390625	2277.82	0.0937396	0.0937396	6.713273131981223	1.0671327313198122	0.013434852144394832	0.0957149	4.156720161437988	0.0270657	P51659	DHB4_HUMAN	Peroxisomal multifunctional enzyme type 2	HSD17B4	P51659	Homo sapiens	0.503	79686.4		3-hydroxyacyl-CoA dehydrogenase activity,3-hydroxyacyl-CoA dehydratase activity	peroxisome	sp	9606	1	3	UP000005640_9606		32	50
TRUE	t4 / t3	t4	t3	12	A7KAX9	28.550403594970703	44.35884475708008	0.6357106537061165	0.6357106537061165	55.37028963364325	1.5537028963364325	0.013520063864338827	0.0960691	5.274349689483643	0.11645266753974451	A7KAX9	RHG32_HUMAN	Rho GTPase-activating protein 32	ARHGAP32	A7KAX9	Homo sapiens	0.085	230529			fibrillar center,nucleoplasm,Golgi apparatus	sp	9606	1	1	UP000005640_9606		12	12
TRUE	t4 / t3	t4	t3	12	P58546	121.85099029541016	152.5670166015625	0.3243251242160639	0.3243251242160639	25.20785939587833	1.2520785939587833	0.013533051766291335	0.0960691	2.658268928527832	0.0628199	P58546	MTPN_HUMAN	Myotrophin	MTPN	P58546	Homo sapiens	0.39	12894.8				sp	9606	1	2	UP000005640_9606		5	7
TRUE	t4 / t3	t4	t3	12	Q13438	54.780635833740234	60.471439361572266	0.14258790754405126	0.14258790754405126	10.388348804682867	1.1038834880468287	0.013504222128137493	0.0960691	4.5008673667907715	0.041116196215139324	Q13438	OS9_HUMAN	Protein OS-9	OS9	Q13438	Homo sapiens	0.253	75561.6		protein binding	endoplasmic reticulum	sp	9606	1	1	UP000005640_9606		17	21
TRUE	t4 / t3	t4	t3	12	Q8IXT5	284.6261291503906	299.96173095703125	0.0757103	0.0757103	5.3879810165066155	1.0538798101650662	0.013496324191809754	0.0960691	3.9752516746520996	0.028799551075419313	Q8IXT5	RB12B_HUMAN	RNA-binding protein 12B	RBM12B	Q8IXT5	Homo sapiens	0.415	118103				sp	9606	1	2	UP000005640_9606		47	48
TRUE	t4 / t3	t4	t3	12	Q8WVC6	116.66468048095703	125.25562286376953	0.10250750901464455	0.10250750901464455	7.363790264024916	1.0736379026402492	0.013534924298053627	0.0960691	4.024215221405029	0.0487841	Q8WVC6	DCAKD_HUMAN	Dephospho-CoA kinase domain-containing protein	DCAKD	Q8WVC6	Homo sapiens	0.498	26550.2				sp	9606	1	1	UP000005640_9606		11	15
TRUE	t4 / t3	t4	t3	12	P17987	1700.762939453125	1941.12	0.19070515263988563	0.19070515263988563	14.13214284432609	1.141321428443261	0.013570378388921804	0.0960925	4.7214155197143555	0.0608683	P17987	TCPA_HUMAN	T-complex protein 1 subunit alpha	TCP1	P17987	Homo sapiens	0.471	60343.6				sp	9606	1	1	UP000005640_9606		26	38
TRUE	t4 / t3	t4	t3	12	P46952	68.34806823730469	77.92926788330078	0.1892647001707339	0.1892647001707339	14.018244982038318	1.1401824498203832	0.013564561718695268	0.0960925	6.372697830200195	0.070928	P46952	3HAO_HUMAN	3-hydroxyanthranilate 3,4-dioxygenase	HAAO	P46952	Homo sapiens	0.224	32556.1				sp	9606	1	2	UP000005640_9606		7	8
TRUE	t4 / t3	t4	t3	12	P36915	203.5589599609375	215.2321014404297	0.0804465	0.0804465	5.734525997643258	1.0573452599764326	0.013623127693906043	0.0961461	6.2057	0.032629243908647534	P36915	GNL1_HUMAN	Guanine nucleotide-binding protein-like 1	GNL1	P36915	Homo sapiens	0.331	68660.9				sp	9606	1	2	UP000005640_9606		19	21
TRUE	t4 / t3	t4	t3	12	P41567	270.5853576660156	221.6095428466797	-0.288064	0.288064	-18.1	0.8190004986160894	0.0136579	0.0961461	5.306056499481201	0.0766149	P41567	EIF1_HUMAN	Eukaryotic translation initiation factor 1	EIF1	P41567	Homo sapiens	0.15	12732.5				sp	9606	1	1	UP000005640_9606		1	1
TRUE	t4 / t3	t4	t3	12	P49771	6.6457	9.730992317199707	0.5501648359905668	0.5501648359905668	46.42529854950674	1.4642529854950674	0.0136697	0.0961461	4.241702556610107	0.10561160722936422	P49771	FLT3L_HUMAN	Fms-related tyrosine kinase 3 ligand	FLT3LG	P49771	Homo sapiens	0.077	26415.8		protein binding		sp	9606	1	1	UP000005640_9606		2	2
TRUE	t4 / t3	t4	t3	12	Q14088	46.499874114990234	54.76372528076172	0.23599377814882533	0.23599377814882533	17.771771048961725	1.1777177104896173	0.013687619685348124	0.0961461	5.35623	0.0721821	Q14088	RB33A_HUMAN	Ras-related protein Rab-33A	RAB33A	Q14088	Homo sapiens	0.219	26592.7				sp	9606	1	2	UP000005640_9606		7	8
TRUE	t4 / t3	t4	t3	12	Q15599	9.648171424865723	10.26744270324707	0.0897495	0.0897495	6.418535192952035	1.0641853519295204	0.0136826	0.0961461	6.317333221435547	0.0518284	Q15599	NHRF2_HUMAN	Na(+)/H(+) exchange regulatory cofactor NHE-RF2	SLC9A3R2	Q15599	Homo sapiens	0.318	37413.8				sp	9606	1	2	UP000005640_9606		8	9
TRUE	t4 / t3	t4	t3	12	Q8N357	26.665998458862305	33.48756408691406	0.3286240889590387	0.3286240889590387	25.581512121420857	1.2558151212142086	0.013689865349086046	0.0961461	6.703399181365967	0.0825157	Q8N357	S35F6_HUMAN	Solute carrier family 35 member F6	SLC35F6	Q8N357	Homo sapiens	0.051	40214.2				sp	9606	1	1	UP000005640_9606		2	3
TRUE	t4 / t3	t4	t3	12	Q8N684	947.3483276367188	1051.032470703125	0.14984035223367093	0.14984035223367093	10.944669457015843	1.1094466945701584	0.0136819	0.0961461	4.57492	0.045372584162463266	Q8N684	CPSF7_HUMAN	Cleavage and polyadenylation specificity factor subunit 7	CPSF7	Q8N684	Homo sapiens	0.386	52050.1		protein binding		sp	9606	1	1	UP000005640_9606		17	21
TRUE	t4 / t3	t4	t3	12	Q9NVX0	12.412243843078613	14.805766105651855	0.2543951983477196	0.2543951983477196	19.283558177177863	1.1928355817717786	0.013670373054755228	0.0961461	2.839264154434204	0.0452233	Q9NVX0	HAUS2_HUMAN	HAUS augmin-like complex subunit 2	HAUS2	Q9NVX0	Homo sapiens	0.174	26933.5				sp	9606	1	1	UP000005640_9606		4	4
TRUE	t4 / t3	t4	t3	12	Q9Y2S2	130.7870635986328	142.1705780029297	0.1204030840420043	0.1204030840420043	8.703853493669133	1.0870385349366913	0.013659533082574353	0.0961461	3.782912254333496	0.0372663	Q9Y2S2	CRYL1_HUMAN	Lambda-crystallin homolog	CRYL1	Q9Y2S2	Homo sapiens	0.21	35419.2				sp	9606	1	3	UP000005640_9606		8	10
TRUE	t4 / t3	t4	t3	12	P78324	324.09588623046875	361.8023986816406	0.15878126423398542	0.15878126423398542	11.63436934968014	1.1163436934968014	0.013870399683489219	0.0965318	5.014420032501221	0.0445096	P78324	SHPS1_HUMAN	Tyrosine-protein phosphatase non-receptor type substrate 1	SIRPA	P78324	Homo sapiens	0.343	54966.8				sp	9606	1	2	UP000005640_9606		15	17
TRUE	t4 / t3	t4	t3	12	Q5TID7	107.95419311523438	68.28587341308594	-0.66076	0.6607602229729238	-36.7455	0.6325448918894241	0.013851822764258514	0.0965318	4.245225429534912	0.14255984613926473	Q5TID7	CC181_HUMAN	Coiled-coil domain-containing protein 181	CCDC181	Q5TID7	Homo sapiens	0.018	60103				sp	9606	2	1	UP000005640_9606		2	2
TRUE	t4 / t3	t4	t3	12	Q6P1J9	324.6341552734375	375.3823547363281	0.20954604018236236	0.20954604018236236	15.632427653875691	1.156324276538757	0.013826355144880566	0.0965318	6.886775016784668	0.0662693	Q6P1J9	CDC73_HUMAN	Parafibromin	CDC73	Q6P1J9	Homo sapiens	0.667	60576.6				sp	9606	1	1	UP000005640_9606		34	43
TRUE	t4 / t3	t4	t3	12	Q96HD9	6.1345415115356445	4.32673	-0.503677	0.5036769124391997	-29.4693	0.7053069140881205	0.013850758913910197	0.0965318	4.759889602661133	0.0771887	Q96HD9	ACY3_HUMAN	N-acyl-aromatic-L-amino acid amidohydrolase (carboxylate-forming)	ACY3	Q96HD9	Homo sapiens	0.103	35240.9				sp	9606	1	1	UP000005640_9606		2	2
TRUE	t4 / t3	t4	t3	12	Q9UJY4	40.7754	48.827903747558594	0.260007	0.260007	19.74842986176384	1.1974842986176384	0.013828053062350347	0.0965318	5.389726161956787	0.0468494	Q9UJY4	GGA2_HUMAN	ADP-ribosylation factor-binding protein GGA2	GGA2	Q9UJY4	Homo sapiens	0.272	67150.3				sp	9606	1	3	UP000005640_9606		15	16
TRUE	t4 / t3	t4	t3	12	Q9H7P9	3.938560962677002	2.309082269668579	-0.770349	0.7703490311056805	-41.3724	0.5862756198393634	0.0139089	0.0965991	5.998607635498047	0.15587592966627756	Q9H7P9	PKHG2_HUMAN	Pleckstrin homology domain-containing family G member 2	PLEKHG2	Q9H7P9	Homo sapiens	0.009	147969		protein binding		sp	9606	1	3	UP000005640_9606		1	1
TRUE	t4 / t3	t4	t3	12	Q9HAU0	25.56312370300293	28.98714828491211	0.1813492719183886	0.1813492719183886	13.39439037924366	1.1339439037924366	0.013928273334949571	0.0965991	5.210221290588379	0.044839457358689716	Q9HAU0	PKHA5_HUMAN	Pleckstrin homology domain-containing family A member 5	PLEKHA5	Q9HAU0	Homo sapiens	0.272	127464			nucleoplasm,cytosol	sp	9606	1	1	UP000005640_9606		30	33
TRUE	t4 / t3	t4	t3	12	Q9HC21	242.23976135253906	274.8966369628906	0.18245356814500693	0.18245356814500693	13.481220187805999	1.13481	0.013970840760900176	0.0966633	7.547096252441406	0.061159397584004245	Q9HC21	TPC_HUMAN	Mitochondrial thiamine pyrophosphate carrier	SLC25A19	Q9HC21	Homo sapiens	0.391	35511.1			mitochondrion	sp	9606	1	1	UP000005640_9606		13	13
TRUE	t4 / t3	t4	t3	12	Q9P209	5.96512	4.085364818572998	-0.546086	0.5460862066240009	-31.5124	0.6848755647888773	0.013948553651577477	0.0966633	4.58914	0.0745218	Q9P209	CEP72_HUMAN	Centrosomal protein of 72 kDa	CEP72	Q9P209	Homo sapiens	0.059	71717.6			centrosome,cytosol	sp	9606	1	2	UP000005640_9606		4	4
TRUE	t4 / t3	t4	t3	12	P61081	923.7811889648438	1096.6795654296875	0.24751897793915525	0.24751897793915525	18.716377701800525	1.1871637770180052	0.0140463	0.0967969	6.742225646972656	0.0795156	P61081	UBC12_HUMAN	NEDD8-conjugating enzyme Ubc12	UBE2M	P61081	Homo sapiens	0.311	20900				sp	9606	1	1	UP000005640_9606		6	6
TRUE	t4 / t3	t4	t3	12	Q9C086	19.69096565246582	23.354032516479492	0.2461378168053324	0.2461378168053324	18.602779206793052	1.1860277920679305	0.0140484	0.0967969	5.691051483154297	0.0791048	Q9C086	IN80B_HUMAN	INO80 complex subunit B	INO80B	Q9C086	Homo sapiens	0.121	38637.1				sp	9606	1	2	UP000005640_9606		5	5
TRUE	t4 / t3	t4	t3	12	Q9NTJ5	529.674	588.4444580078125	0.15180202389172043	0.15180202389172043	11.0956	1.110956265464079	0.0140282	0.0967969	6.52846	0.0482921	Q9NTJ5	SAC1_HUMAN	Phosphatidylinositol-3-phosphatase SAC1	SACM1L	Q9NTJ5	Homo sapiens	0.479	66966.9				sp	9606	1	2	UP000005640_9606		29	41
TRUE	t4 / t3	t4	t3	12	Q13185	1888.9217529296875	2084.99	0.14247599663338906	0.14247599663338906	10.379786231746625	1.1037978623174662	0.014072271753420344	0.0968236	4.420649528503418	0.044093	Q13185	CBX3_HUMAN	Chromobox protein homolog 3	CBX3	Q13185	Homo sapiens	0.301	20811.4				sp	9606	1	4	UP000005640_9606		8	14
TRUE	t4 / t3	t4	t3	12	O43251;Q9NWB1	20.90812873840332	23.30786895751953	0.15675315704203652	0.15675315704203652	11.477546599894662	1.1147754659989466	0.014097802492469613	0.0968895	6.075945854187012	0.0712487	O43251;Q9NWB1	RFOX2_HUMAN;RFOX1_HUMAN	RNA binding protein fox-1 homolog 2;RNA binding protein fox-1 homolog 1	RBFOX2;RBFOX1	O43251;Q9NWB1	Homo sapiens	8.5%;8.3%	41373.77;42784.31	;	protein binding;protein binding	nucleoplasm;	sp	9606	1	3;2	UP000005640_9606		3	3
TRUE	t4 / t3	t4	t3	12	P06703	412.6075439453125	554.6348266601562	0.4267680099033393	0.4267680099033393	34.421882197497645	1.3442188219749764	0.014145687980879444	0.0969025	3.515259265899658	0.0704705	P06703	S10A6_HUMAN	Protein S100-A6	S100A6	P06703	Homo sapiens	0.167	10179.7				sp	9606	1	1	UP000005640_9606		2	3
TRUE	t4 / t3	t4	t3	12	P62826	7968.3	8750.59	0.13510795861097846	0.13510795861097846	9.8175	1.0981749884720795	0.014116	0.0969025	7.793628692626953	0.0715333	P62826	RAN_HUMAN	GTP-binding nuclear protein Ran	RAN	P62826	Homo sapiens	0.449	24423.1				sp	9606	1	3	UP000005640_9606		16	21
TRUE	t4 / t3	t4	t3	12	Q5TBB1	432.55828857421875	474.5140075683594	0.13355612248254467	0.13355612248254467	9.699437070650841	1.0969943707065084	0.014125777555873837	0.0969025	3.73457	0.024070062132726208	Q5TBB1	RNH2B_HUMAN	Ribonuclease H2 subunit B	RNASEH2B	Q5TBB1	Homo sapiens	0.429	35138.7			nucleoplasm	sp	9606	1	1	UP000005640_9606		16	22
TRUE	t4 / t3	t4	t3	12	Q5VWJ9	25.867698669433594	30.909650802612305	0.2569056458784152	0.2569056458784152	19.491305344207156	1.1949130534420715	0.014136155672142903	0.0969025	5.268491744995117	0.0648529	Q5VWJ9	SNX30_HUMAN	Sorting nexin-30	SNX30	Q5VWJ9	Homo sapiens	0.153	49676.6				sp	9606	1	1	UP000005640_9606		8	8
TRUE	t4 / t3	t4	t3	12	Q9H8W4	133.02304077148438	151.20408630371094	0.18482097408803386	0.18482097408803386	13.667591288534098	1.136675912885341	0.014195579907286773	0.0970348	2.7401351928710938	0.029936328791395368	Q9H8W4	PKHF2_HUMAN	Pleckstrin homology domain-containing family F member 2	PLEKHF2	Q9H8W4	Homo sapiens	0.229	27797.8				sp	9606	1	1	UP000005640_9606		5	6
TRUE	t4 / t3	t4	t3	12	Q9Y4L1	1355.7264404296875	1446.2352294921875	0.0932361	0.0932361	6.6760362830877495	1.0667603628308775	0.014180107033699062	0.0970348	3.8257651329040527	0.037018028076925336	Q9Y4L1	HYOU1_HUMAN	Hypoxia up-regulated protein 1	HYOU1	Q9Y4L1	Homo sapiens	0.565	111335				sp	9606	1	1	UP000005640_9606		47	70
TRUE	t4 / t3	t4	t3	12	P52294	196.1669464111328	207.1956329345703	0.0789116	0.0789116	5.622092164458348	1.0562209216445835	0.014235271344608107	0.0970877	4.597685813903809	0.038987378721799325	P52294	IMA5_HUMAN	Importin subunit alpha-5	KPNA1	P52294	Homo sapiens	0.136	60221.8				sp	9606	1	3	UP000005640_9606		7	9
TRUE	t4 / t3	t4	t3	12	Q8WW12	620.9805908203125	655.5584716796875	0.0781763	0.0781763	5.568270791474794	1.055682707914748	0.014256519152216202	0.0970877	4.141880989074707	0.0203375	Q8WW12	PCNP_HUMAN	PEST proteolytic signal-containing nuclear protein	PCNP	Q8WW12	Homo sapiens	0.376	18924.9			nucleoplasm,nuclear body	sp	9606	1	2	UP000005640_9606		10	13
TRUE	t4 / t3	t4	t3	12	O15371	1082.870361328125	1209.7408447265625	0.15983748373922757	0.15983748373922757	11.716128534798266	1.1171612853479826	0.014301646473690595	0.0971081	4.987574577331543	0.041798655828188286	O15371	EIF3D_HUMAN	Eukaryotic translation initiation factor 3 subunit D	EIF3D	O15371	Homo sapiens	0.265	63972.8				sp	9606	1	1	UP000005640_9606		17	24
TRUE	t4 / t3	t4	t3	12	O43824	72.48731994628906	78.17454528808594	0.10897027295752591	0.10897027295752591	7.8458209601499185	1.0784582096014992	0.014390172464253575	0.0973019	6.814091682434082	0.0440942	O43824	GTPB6_HUMAN	Putative GTP-binding protein 6	GTPBP6	O43824	Homo sapiens	0.277	56897.5				sp	9606	1	4	UP000005640_9606		14	17
TRUE	t4 / t3	t4	t3	12	P42677	990.4717407226562	1119.746337890625	0.17698422879850992	0.17698422879850992	13.051820849896135	1.1305182084989613	0.014453317934437463	0.0974576	4.566485404968262	0.0470519	P42677	RS27_HUMAN	40S ribosomal protein S27	RPS27	P42677	Homo sapiens	0.143	9461.12				sp	9606	1	3	UP000005640_9606		2	4
TRUE	t4 / t3	t4	t3	12	P10809	9585.92	9843.13	0.0382001	0.0382001	2.6831959026815566	1.0268319590268156	0.014510222658839824	0.0976804	7.131809711456299	0.021046	P10809	CH60_HUMAN	60 kDa heat shock protein, mitochondrial	HSPD1	P10809	Homo sapiens	0.695	61054.6			mitochondrion	sp	9606	1	2	UP000005640_9606		42	84
TRUE	t4 / t3	t4	t3	12	Q9UKM9	1798.961669921875	2060.94	0.19614109190821014	0.19614109190821014	14.562993219694476	1.1456299321969448	0.014651047399725678	0.0981164	4.872472763061523	0.0596184	Q9UKM9	RALY_HUMAN	RNA-binding protein Raly	RALY	Q9UKM9	Homo sapiens	0.415	32463.2				sp	9606	1	1	UP000005640_9606		16	23
TRUE	t4 / t3	t4	t3	12	P36941	20.321353912353516	23.22852325439453	0.1929009131849742	0.1929009131849742	14.305982537284212	1.1430598253728421	0.014699201045818823	0.0981676	7.280788898468018	0.11062139793290979	P36941	TNR3_HUMAN	Tumor necrosis factor receptor superfamily member 3	LTBR	P36941	Homo sapiens	0.041	46709.1			Golgi apparatus	sp	9606	1	1	UP000005640_9606		2	2
TRUE	t4 / t3	t4	t3	12	P51817	25.902923583984375	28.523456573486328	0.13903388357951582	0.13903388357951582	10.11674601519581	1.101167460151958	0.014791777269637063	0.0981676	5.726132392883301	0.0335455	P51817	PRKX_HUMAN	cAMP-dependent protein kinase catalytic subunit PRKX	PRKX	P51817	Homo sapiens	0.131	40895.9				sp	9606	1	1	UP000005640_9606		5	6
TRUE	t4 / t3	t4	t3	12	Q7Z5K2	130.31524658203125	138.2096405029297	0.0848524	0.0848524	6.057920410662798	1.060579204106628	0.014764589750315825	0.0981676	3.6846253871917725	0.0354823	Q7Z5K2	WAPL_HUMAN	Wings apart-like protein homolog	WAPL	Q7Z5K2	Homo sapiens	0.288	132946			nucleoplasm,cytosol,intracellular membrane-bounded organelle,intercellular bridge,mitotic spindle	sp	9606	1	1	UP000005640_9606		32	38
TRUE	t4 / t3	t4	t3	12	Q8NHW5	138.2681884765625	77.66032409667969	-0.83222	0.8322196390219613	-43.8336	0.5616644359945723	0.014713945231807284	0.0981676	4.244612693786621	0.16427033921577694	Q8NHW5	RLA0L_HUMAN	60S acidic ribosomal protein P0-like	RPLP0P6	Q8NHW5	Homo sapiens	0.098	34364.5				sp	9606	5	1	UP000005640_9606		1	1
TRUE	t4 / t3	t4	t3	12	Q99865;Q9BPZ2	14.263812065124512	16.71845054626465	0.2290815459280838	0.2290815459280838	17.20885321492569	1.172088532149257	0.014774782709025406	0.0981676	6.702677249908447	0.0681136	Q99865;Q9BPZ2	SPI2A_HUMAN;SPI2B_HUMAN	Spindlin-2A;Spindlin-2B	SPIN2A;SPIN2B	Q99865;Q9BPZ2	Homo sapiens	20.5%;20.5%	29188.16;29158.14	;	;	;	sp	9606	1	3;1	UP000005640_9606		4	4
TRUE	t4 / t3	t4	t3	12	Q9BZ95	81.13016510009766	85.74536895751953	0.0798203	0.0798203	5.688641027326491	1.056886410273265	0.014685259378224765	0.0981676	5.9184675216674805	0.0313585	Q9BZ95	NSD3_HUMAN	Histone-lysine N-methyltransferase NSD3	NSD3	Q9BZ95	Homo sapiens	0.173	161613		protein binding		sp	9606	1	1	UP000005640_9606		23	26
TRUE	t4 / t3	t4	t3	12	Q9NYU2	737.9449462890625	795.0029907226562	0.10744709833317592	0.10744709833317592	7.732019132392476	1.0773201913239248	0.014761307247441761	0.0981676	2.8512651920318604	0.0282745	Q9NYU2	UGGG1_HUMAN	UDP-glucose:glycoprotein glucosyltransferase 1	UGGT1	Q9NYU2	Homo sapiens	0.414	177190				sp	9606	1	3	UP000005640_9606		62	87
TRUE	t4 / t3	t4	t3	12	O43252	682.7101440429688	727.2051391601562	0.0910892	0.0910892	6.517406472634324	1.0651740647263432	0.014894914724896067	0.0984281	4.847031116485596	0.0340576	O43252	PAPS1_HUMAN	Bifunctional 3'-phosphoadenosine 5'-phosphosulfate synthase 1	PAPSS1	O43252	Homo sapiens	0.428	70833.1				sp	9606	1	2	UP000005640_9606		27	41
TRUE	t4 / t3	t4	t3	12	Q03154	97.9127	97.87626647949219	-0.000536883	0.000536883	-0.037207	0.9996279301861448	0.014888734489942969	0.0984281	5.073345184326172	0.023254417387910103	Q03154	ACY1_HUMAN	Aminoacylase-1	ACY1	Q03154	Homo sapiens	0.377	45885				sp	9606	1	1	UP000005640_9606		16	23
TRUE	t4 / t3	t4	t3	12	Q8WUA4	150.3955841064453	165.43528747558594	0.1375047878756137	0.1375047878756137	10.000096384808742	1.1000009638480874	0.014876758199348084	0.0984281	4.716683387756348	0.0318403	Q8WUA4	TF3C2_HUMAN	General transcription factor 3C polypeptide 2	GTF3C2	Q8WUA4	Homo sapiens	0.274	100680		protein binding	nucleoplasm	sp	9606	1	2	UP000005640_9606		19	22
TRUE	t4 / t3	t4	t3	12	Q9BWH2	213.0964813232422	248.59288024902344	0.22227820655126906	0.22227820655126906	16.657430805690975	1.1665743080569098	0.014875	0.0984281	6.802556037902832	0.0634964	Q9BWH2	FUND2_HUMAN	FUN14 domain-containing protein 2	FUNDC2	Q9BWH2	Homo sapiens	0.354	20675.7				sp	9606	1	2	UP000005640_9606		7	7
TRUE	t4 / t3	t4	t3	12	Q9Y3D0	25.264570236206055	33.160369873046875	0.3923444596894849	0.3923444596894849	31.252459721343428	1.3125245972134343	0.014852889580236507	0.0984281	5.987477779388428	0.0742351	Q9Y3D0	CIA2B_HUMAN	Cytosolic iron-sulfur assembly component 2B	CIAO2B	Q9Y3D0	Homo sapiens	0.282	17663				sp	9606	1	1	UP000005640_9606		3	5
TRUE	t4 / t3	t4	t3	12	Q96S06	9.556523323059082	7.64372	-0.322211	0.32221107943515737	-20.0157	0.7998430954357567	0.015008629176564467	0.098735	6.93112	0.11876185627253365	Q96S06	LMF1_HUMAN	Lipase maturation factor 1	LMF1	Q96S06	Homo sapiens	0.086	64873.5				sp	9606	1	1	UP000005640_9606		3	3
TRUE	t4 / t3	t4	t3	12	O96005	230.14755249023438	285.1192626953125	0.3090064109696281	0.3090064109696281	23.88542029244942	1.2388542029244942	0.015080258325257301	0.0987416	7.492875099182129	0.0952087	O96005	CLPT1_HUMAN	Putative lipid scramblase CLPTM1	CLPTM1	O96005	Homo sapiens	0.238	76096.7				sp	9606	1	1	UP000005640_9606		16	18
TRUE	t4 / t3	t4	t3	12	P62269	9503.08	10529.8	0.14800709383060537	0.14800709383060537	10.803779614947873	1.1080377961494787	0.0150386	0.0987416	4.980434894561768	0.0660821	P62269	RS18_HUMAN	40S ribosomal protein S18	RPS18	P62269	Homo sapiens	0.592	17718.7				sp	9606	1	3	UP000005640_9606		14	16
TRUE	t4 / t3	t4	t3	12	O95834	95.64702606201172	114.74085235595703	0.26258712335626183	0.26258712335626183	19.962801856030566	1.1996280185603057	0.015146245055600839	0.0988988	4.812751293182373	0.0657383	O95834	EMAL2_HUMAN	Echinoderm microtubule-associated protein-like 2	EML2	O95834	Homo sapiens	0.234	70678.8				sp	9606	1	1	UP000005640_9606		14	18
TRUE	t4 / t3	t4	t3	12	P54105	498.6582336425781	542.8032836914062	0.12237807681357268	0.12237807681357268	8.852766698818781	1.0885276669881878	0.015147539796073336	0.0988988	5.30012	0.0498453	P54105	ICLN_HUMAN	Methylosome subunit pICln	CLNS1A	P54105	Homo sapiens	0.16	26215.3				sp	9606	1	1	UP000005640_9606		3	3
TRUE	t4 / t3	t4	t3	12	P14324	1232.31	1354.1392822265625	0.136006	0.136006	9.885855740199222	1.0988585574019922	0.0151956	0.0989253	5.557260990142822	0.0502938	P14324	FPPS_HUMAN	Farnesyl pyrophosphate synthase	FDPS	P14324	Homo sapiens	0.191	48275.5			nucleoplasm,cytosol	sp	9606	1	4	UP000005640_9606		9	14
TRUE	t4 / t3	t4	t3	12	P60033	115.19225311279297	139.987	0.2812472681128037	0.2812472681128037	21.524505879035893	1.215245058790359	0.015208628834826545	0.0989253	7.1369547843933105	0.0820556	P60033	CD81_HUMAN	CD81 antigen	CD81	P60033	Homo sapiens	0.119	25809.4				sp	9606	1	1	UP000005640_9606		2	2
TRUE	t4 / t3	t4	t3	12	Q9BQA9	116.0470199584961	119.15814971923828	0.038168151469103365	0.038168151469103365	2.6809217176407163	1.0268092171764072	0.015220531621281664	0.0989498	6.447898864746094	0.0402236	Q9BQA9	CYBC1_HUMAN	Cytochrome b-245 chaperone 1	CYBC1	Q9BQA9	Homo sapiens	0.337	20773.8				sp	9606	1	1	UP000005640_9606		7	13
TRUE	t4 / t3	t4	t3	12	Q99700	153.01177978515625	166.16976928710938	0.11901521656937662	0.11901521656937662	8.599331058319981	1.0859933105831998	0.015257735568074927	0.0990618	7.826513767242432	0.035593166762757575	Q99700	ATX2_HUMAN	Ataxin-2	ATXN2	Q99700	Homo sapiens	0.181	140283		protein binding	cytosol	sp	9606	1	2	UP000005640_9606		24	29
TRUE	t4 / t3	t4	t3	12	O00746	130.79885864257812	146.40211486816406	0.16258644252404106	0.16258644252404106	11.929199067572526	1.1192919906757253	0.015281169150205366	0.0991317	4.3305253982543945	0.057633308025250386	O00746	NDKM_HUMAN	Nucleoside diphosphate kinase, mitochondrial	NME4	O00746	Homo sapiens	0.604	20658.6			mitochondrion	sp	9606	1	1	UP000005640_9606		9	14
TRUE	t4 / t3	t4	t3	12	Q86U70	69.42227172851562	53.81782913208008	-0.367314	0.3673143780618714	-22.4776	0.7752242586146035	0.015349409653589309	0.099237	6.082465171813965	0.057039711371705944	Q86U70	LDB1_HUMAN	LIM domain-binding protein 1	LDB1	Q86U70	Homo sapiens	0.178	46532.6		protein binding		sp	9606	1	2	UP000005640_9606		5	8
TRUE	t4 / t3	t4	t3	12	Q96FN4	39.383243560791016	41.35612487792969	0.0705191	0.0705191	5.009443455548257	1.0500944345554826	0.015367135585522388	0.099237	6.818368434906006	0.046668	Q96FN4	CPNE2_HUMAN	Copine-2	CPNE2	Q96FN4	Homo sapiens	0.285	61189.8				sp	9606	1	3	UP000005640_9606		13	15
TRUE	t4 / t3	t4	t3	12	Q96NL8	11.152427673339844	7.062794208526611	-0.659047	0.6590468260131477	-36.6703	0.6332965714191895	0.015383390914988755	0.099237	3.2777750492095947	0.0816254	Q96NL8	CF418_HUMAN	Cilia- and flagella-associated protein 418	CFAP418	Q96NL8	Homo sapiens	0.072	23380.5				sp	9606	1	1	UP000005640_9606		1	2
TRUE	t4 / t3	t4	t3	12	Q9NP66	65.83195495605469	75.39669799804688	0.19571330108928717	0.19571330108928717	14.529027807813112	1.145290278078131	0.015385480626107312	0.099237	4.592329978942871	0.049029678734416215	Q9NP66	HM20A_HUMAN	High mobility group protein 20A	HMG20A	Q9NP66	Homo sapiens	0.277	40143.6				sp	9606	1	1	UP000005640_9606		13	16
TRUE	t4 / t3	t4	t3	12	O94855	250.3009796142578	266.6997985839844	0.0915528	0.0915528	6.551639947633836	1.0655163994763384	0.015503530588943616	0.0995637	6.253454208374023	0.0412647	O94855	SC24D_HUMAN	Protein transport protein Sec24D	SEC24D	O94855	Homo sapiens	0.202	113010		protein binding	intracellular membrane-bounded organelle	sp	9606	1	2	UP000005640_9606		20	25
TRUE	t4 / t3	t4	t3	12	O60831	43.761	116.85030364990234	1.4169443226578198	1.4169443226578198	167.01935549108762	2.670193554910876	0.0155523	0.0997388	5.103847503662109	0.3646926947123087	O60831	PRAF2_HUMAN	PRA1 family protein 2	PRAF2	O60831	Homo sapiens	0.163	19257.9				sp	9606	1	1	UP000005640_9606		2	2
TRUE	t4 / t3	t4	t3	12	Q92930	107.52918243408203	117.03733825683594	0.12224061704666442	0.12224061704666442	8.8424	1.0884239571763008	0.021352	0.110811	6.919855117797852	0.0464569	Q92930	RAB8B_HUMAN	Ras-related protein Rab-8B	RAB8B	Q92930	Homo sapiens	0.237	23584.1				sp	9606	1	2	UP000005640_9606		5	9
TRUE	t4 / t3	t4	t3	12	O00422	254.74851989746094	290.0000915527344	0.1869795914176265	0.1869795914176265	13.837792529457115	1.1383779252945712	0.026504261403190944	0.117599	3.8221404552459717	0.0693312	O00422	SAP18_HUMAN	Histone deacetylase complex subunit SAP18	SAP18	O00422	Homo sapiens	0.719	17561.1			nucleoplasm,cytosol,nuclear body	sp	9606	1	1	UP000005640_9606		15	24
TRUE	t4 / t3	t4	t3	12	P41218	387.18658447265625	434.5391540527344	0.1664572106957613	0.1664572106957613	12.229909681548445	1.1222990968154845	0.0284552	0.12007	2.6138603687286377	0.056897102680594044	P41218	MNDA_HUMAN	Myeloid cell nuclear differentiation antigen	MNDA	P41218	Homo sapiens	0.256	45836.1				sp	9606	1	1	UP000005640_9606		12	14
TRUE	t4 / t3	t4	t3	12	O60637	140.04534912109375	173.80148315429688	0.3115463210182885	0.3115463210182885	24.10371657827426	1.2410371657827426	0.0395058	0.133543	2.5511159896850586	0.0794674	O60637	TSN3_HUMAN	Tetraspanin-3	TSPAN3	O60637	Homo sapiens	0.126	28017.7				sp	9606	2	1	UP000005640_9606		4	6
TRUE	t4 / t3	t4	t3	12	O96007	21.8201	17.30154800415039	-0.334754	0.33475411865975596	-20.7081	0.7929192638774294	0.039369837894414526	0.133543	5.337868690490723	0.042074755615963425	O96007	MOC2B_HUMAN	Molybdopterin synthase catalytic subunit	MOCS2	O96007	Homo sapiens	0.431	20944				sp	9606	1	1	UP000005640_9606		7	7
TRUE	t4 / t3	t4	t3	12	P51532	360.00250244140625	369.937	0.0392718	0.0392718	2.7594989116320523	1.0275949891163205	0.039401486394612814	0.133543	4.03601	0.028946420151169158	P51532	SMCA4_HUMAN	Transcription activator BRG1	SMARCA4	P51532	Homo sapiens	0.259	184646			fibrillar center,nucleoplasm,nucleolus	sp	9606	1	2	UP000005640_9606		44	59
TRUE	t4 / t3	t4	t3	12	Q53H82	122.84333801269531	133.2559051513672	0.11737984631976141	0.11737984631976141	8.476297784740904	1.084762977847409	0.0393526	0.133543	3.8189098834991455	0.0322249	Q53H82	LACB2_HUMAN	Endoribonuclease LACTB2	LACTB2	Q53H82	Homo sapiens	0.347	32805.6				sp	9606	1	2	UP000005640_9606		10	13
TRUE	t4 / t3	t4	t3	12	Q7Z6E9	54.32587814331055	57.38595962524414	0.0790582	0.0790582	5.632824698868477	1.0563282469886848	0.0394542	0.133543	6.832265377044678	0.042178346042617214	Q7Z6E9	RBBP6_HUMAN	E3 ubiquitin-protein ligase RBBP6	RBBP6	Q7Z6E9	Homo sapiens	0.216	201564		protein binding	nuclear speck	sp	9606	1	1	UP000005640_9606		41	45
TRUE	t4 / t3	t4	t3	12	Q8N766	341.7956237792969	364.5699768066406	0.0930618	0.0930618	6.6631493918861695	1.0666314939188617	0.039222449808458855	0.133543	2.9311580657958984	0.0366944	Q8N766	EMC1_HUMAN	ER membrane protein complex subunit 1	EMC1	Q8N766	Homo sapiens	0.499	111759				sp	9606	1	1	UP000005640_9606		40	50
TRUE	t4 / t3	t4	t3	12	Q8TAP8	12.41721248626709	8.503532409667969	-0.546207	0.546207	-31.5182	0.6848181440941367	0.0393129	0.133543	4.203671932220459	0.10071446534182799	Q8TAP8	PPR35_HUMAN	Protein phosphatase 1 regulatory subunit 35	PPP1R35	Q8TAP8	Homo sapiens	0.107	27953.1				sp	9606	1	1	UP000005640_9606		3	3
TRUE	t4 / t3	t4	t3	12	Q8WVV9	150.12149047851562	157.12319946289062	0.0657657	0.0657657	4.6640284226175055	1.046640284226175	0.0393814	0.133543	4.0500969886779785	0.032753976857917075	Q8WVV9	HNRLL_HUMAN	Heterogeneous nuclear ribonucleoprotein L-like	HNRNPLL	Q8WVV9	Homo sapiens	0.347	60083.1		protein binding		sp	9606	1	1	UP000005640_9606		15	21
TRUE	t4 / t3	t4	t3	12	Q96SB8	103.05574035644531	103.79440307617188	0.010303783742193342	0.010303783742193342	0.7167603834310476	1.0071676038343105	0.0392817	0.133543	4.1754	0.013106100422612075	Q96SB8	SMC6_HUMAN	Structural maintenance of chromosomes protein 6	SMC6	Q96SB8	Homo sapiens	0.423	126326			nucleoplasm	sp	9606	1	2	UP000005640_9606		43	50
TRUE	t4 / t3	t4	t3	12	Q9P219	42.791446685791016	45.371097564697266	0.0844511	0.0844511	6.028426423271238	1.0602842642327124	0.039493697142518706	0.133543	4.484014987945557	0.026737133422403223	Q9P219	DAPLE_HUMAN	Protein Daple	CCDC88C	Q9P219	Homo sapiens	0.176	228230			cell junction	sp	9606	1	3	UP000005640_9606		38	42
TRUE	t4 / t3	t4	t3	12	Q9ULC5	74.71956634521484	82.9857	0.15137737922037572	0.15137737922037572	11.062931332089597	1.110629313320896	0.0392442	0.133543	3.9711592197418213	0.0767975	Q9ULC5	ACSL5_HUMAN	Long-chain-fatty-acid--CoA ligase 5	ACSL5	Q9ULC5	Homo sapiens	0.187	75990.8	long-chain fatty acid metabolic process,regulation of extrinsic apoptotic signaling pathway	long-chain fatty acid-CoA ligase activity	nucleoplasm,nucleolus,mitochondrion,endoplasmic reticulum	sp	9606	1	1	UP000005640_9606		16	20
TRUE	t4 / t3	t4	t3	12	Q9Y2T2	258.8756103515625	291.1463928222656	0.16948569462173949	0.16948569462173949	12.465748483172368	1.1246574848317237	0.0392993	0.133543	5.581093788146973	0.0794776	Q9Y2T2	AP3M1_HUMAN	AP-3 complex subunit mu-1	AP3M1	Q9Y2T2	Homo sapiens	0.287	46939.2				sp	9606	1	1	UP000005640_9606		10	13
TRUE	t4 / t3	t4	t3	12	Q9Y3C1	106.83562469482422	111.79924774169922	0.0655177	0.0655177	4.646037369139355	1.0464603736913936	0.039532	0.133543	6.665168285369873	0.0378487	Q9Y3C1	NOP16_HUMAN	Nucleolar protein 16	NOP16	Q9Y3C1	Homo sapiens	0.551	21188.3			nucleoplasm,nucleolus,intracellular membrane-bounded organelle	sp	9606	1	2	UP000005640_9606		11	18
TRUE	t4 / t3	t4	t3	12	Q9Y620	26.08051300048828	27.496370315551758	0.0762689	0.0762689	5.428793962131673	1.0542879396213167	0.0394854	0.133543	6.485846996307373	0.043547	Q9Y620	RA54B_HUMAN	DNA repair and recombination protein RAD54B	RAD54B	Q9Y620	Homo sapiens	0.119	102967				sp	9606	1	1	UP000005640_9606		9	9
TRUE	t4 / t3	t4	t3	12	P04233	509.7313232421875	521.4556274414062	0.032807483500445704	0.032807483500445704	2.300094905811423	1.0230009490581142	0.0398953	0.133726	5.088804721832275	0.0354437	P04233	HG2A_HUMAN	HLA class II histocompatibility antigen gamma chain	CD74	P04233	Homo sapiens	0.358	33515.6	negative regulation of viral entry into host cell,protein stabilization	protein binding	lysosome,late endosome	sp	9606	1	3	UP000005640_9606		10	18
TRUE	t4 / t3	t4	t3	12	P27701	895.2174682617188	991.3	0.14708290321369177	0.14708290321369177	10.732821430721518	1.1073282143072152	0.03989	0.133726	4.420352935791016	0.0606055	P27701	CD82_HUMAN	CD82 antigen	CD82	P27701	Homo sapiens	0.206	29625.5				sp	9606	1	1	UP000005640_9606		5	8
TRUE	t4 / t3	t4	t3	12	Q9UIQ6	373.3934326171875	418.559	0.16473557026270527	0.16473557026270527	12.096059975696672	1.1209605997569667	0.0422639	0.135925	3.1423659324645996	0.067728	Q9UIQ6	LCAP_HUMAN	Leucyl-cystinyl aminopeptidase	LNPEP	Q9UIQ6	Homo sapiens	0.307	117349		protein binding		sp	9606	1	3	UP000005640_9606		30	42
TRUE	t4 / t3	t4	t3	12	O43396	1014.76	1139.180419921875	0.16686289015745506	0.16686289015745506	12.261472673021778	1.1226147267302178	0.0490525	0.141026	3.905250072479248	0.067188	O43396	TXNL1_HUMAN	Thioredoxin-like protein 1	TXNL1	O43396	Homo sapiens	0.443	32251.3				sp	9606	1	3	UP000005640_9606		12	18
TRUE	t4 / t3	t4	t3	12	Q86SF2	174.9265899658203	189.4239959716797	0.11486949616344845	0.11486949616344845	8.287708580320508	1.082877085803205	0.0554541	0.145332	5.459177494049072	0.0576884	Q86SF2	GALT7_HUMAN	N-acetylgalactosaminyltransferase 7	GALNT7	Q86SF2	Homo sapiens	0.288	75389.1				sp	9606	1	1	UP000005640_9606		21	27
TRUE	t4 / t3	t4	t3	12	Q12851	30.85280418395996	24.996936798095703	-0.30365	0.3036503071955033	-18.98	0.8101998330217044	0.05826	0.14769	3.614142417907715	0.050482518204548146	Q12851	M4K2_HUMAN	Mitogen-activated protein kinase kinase kinase kinase 2	MAP4K2	Q12851	Homo sapiens	0.16	91555.9				sp	9606	1	2	UP000005640_9606		11	13
TRUE	t4 / t3	t4	t3	12	Q7Z2H8	4.459057807922363	8.160188674926758	0.871864	0.871864	83.00253162066282	1.8300253162066282	0.0582661	0.14769	3.814303398132324	0.3785513040686337	Q7Z2H8	S36A1_HUMAN	Proton-coupled amino acid transporter 1	SLC36A1	Q7Z2H8	Homo sapiens	0.032	53075.7				sp	9606	1	1	UP000005640_9606		1	1
TRUE	t4 / t3	t4	t3	12	P53621	1053.9180908203125	1148.085205078125	0.12346696861723475	0.12346696861723475	8.93496	1.0893495567426097	0.058805	0.14829	3.5534329414367676	0.053522821399495164	P53621	COPA_HUMAN	Coatomer subunit alpha	COPA	P53621	Homo sapiens	0.484	138346				sp	9606	1	2	UP000005640_9606		57	83
TRUE	t4 / t3	t4	t3	12	Q9BWF3	296.3006286621094	317.094	0.0978478	0.0978478	7.017575842406454	1.0701757584240645	0.058805	0.14829	5.959859848022461	0.0740058	Q9BWF3	RBM4_HUMAN	RNA-binding protein 4	RBM4	Q9BWF3	Homo sapiens	0.407	40313.8		protein binding	nucleoplasm,cytosol	sp	9606	1	1	UP000005640_9606		14	17
493

## Sheet: Phospho
			Esel			FTVI-ESEL
Index	Gene	Protein ID	3_1 MaxLFQ Intensity	3_2 MaxLFQ Intensity	3_3 MaxLFQ Intensity	4_1 MaxLFQ Intensity	4_2 MaxLFQ Intensity	4_3 MaxLFQ Intensity	fold change	log2(FC)	P-value	(-log 10)
O43660_S349	PLRG1	O43660	21522.1	22282.2	20832.7	0.0001	0	0	1.5471e-09	-29.2678	8.52714e-07	6.0692
O43660_T347	PLRG1	O43660	21522.1	22282.2	20832.7	0	0	0	0	#NUM!	8.52714e-07	6.0692
O14639_S586	ABLIM1	O14639	0	0	0	13546.7	14060	12835.4	#DIV/0!	#DIV/0!	2.87423e-06	5.54148
P53671_S287	LIMK2	P53671	0	0	0	10079.6	8771.82	9333.29	#DIV/0!	#DIV/0!	1.56838e-05	4.80455
O14974_S445	PPP1R12A	O14974	0	0	0	11316.2	9482.09	10804.9	#DIV/0!	#DIV/0!	4.26759e-05	4.36982
Q9NQG7_S355	HPS4	Q9NQG7	0	0	0	9099.97	9878.61	10917.3	#DIV/0!	#DIV/0!	4.58643e-05	4.33852
Q9Y6G9_T512	DYNC1LI1	Q9Y6G9	60635.3	56053.8	47188.1	0	0	0	0	#NUM!	0.000158004	3.80133
P06400_T356	RB1	P06400	19066.2	14999.7	19508.2	0	0	0	0	#NUM!	0.000239655	3.62041
Q9H0B6_S581	KLC2	Q9H0B6	0	0	0	8786.97	6607.12	7588.15	#DIV/0!	#DIV/0!	0.000262995	3.58005
Q14152_S881	EIF3A	Q14152	12914.2	10411.5	10818.6	22563.9	21840.7	21149.7	1.91992	0.941043	0.000281105	3.55113
P38159_S332	RBMX	P38159	0	0	0	3248.72	3003.79	4004.8	#DIV/0!	#DIV/0!	0.000343658	3.46387
Q9UKJ3_S1033	GPATCH8	Q9UKJ3	0	0	0	19790.6	14857.3	15994.3	#DIV/0!	#DIV/0!	0.000347366	3.45921
Q9Y2K2_T980	SIK3	Q9Y2K2	0	0	0	4015.92	5242.78	4044.11	#DIV/0!	#DIV/0!	0.000392768	3.40586
Q9H0B6_S582	KLC2	Q9H0B6	4770	6609.48	5990.34	0	0	0	0	#NUM!	0.000429983	3.36655
Q9P035_S114	HACD3	Q9P035	29168.2	31941.9	30451.8	21366.3	21607.1	20337.5	0.691455	-0.532293	0.000453454	3.34347
Q93100_S27	PHKB	Q93100	0	0	0	20856.8	27703.3	21261.5	#DIV/0!	#DIV/0!	0.000466144	3.33148
Q9Y2K2_T469	SIK3	Q9Y2K2	3459.93	3559.48	4644.65	0	0	0	0	#NUM!	0.000511166	3.29144
A6NC98_S1408	CCDC88B	A6NC98	9778.42	8192.77	6926.58	0	0	0	0	#NUM!	0.000549135	3.26032
Q8IZD4_S283	DCP1B	Q8IZD4	9969	12532.5	11308.2	4226.57	4893.9	4779.69	0.41113	-1.28233	0.000988337	3.0051
Q13242_Y190	SRSF9	Q13242	0	0	0	28460.3	35320.1	23497.9	#DIV/0!	#DIV/0!	0.0010561	2.97629
Q14004_T871	CDK13	Q14004	8868.32	8402.16	8410.77	5407.46	6377.21	5757.51	0.683073	-0.549887	0.00109474	2.96069
Q9HCG8_S829	CWC22	Q9HCG8	21547.2	23606	18912.1	9903.78	8265.31	7442.1	0.399767	-1.32277	0.00113573	2.94472
Q8N6S5_T19	ARL6IP6	Q8N6S5	7779.74	8416.63	8105.28	5729.45	5554.4	6224.93	0.720477	-0.472976	0.00114195	2.94235
Q86W92_S601	PPFIBP1	Q86W92	6336.31	6247.63	6819.54	8179.03	8262.07	7900.83	1.25451	0.327128	0.00139439	2.85562
Q13442_S57	PDAP1	Q13442	251600	366542	267312	0	15552	24224.4	0.044922	-4.47643	0.00154081	2.81225
O76021_S361	RSL1D1	O76021	19518	16344.2	31369.6	111297	84042	88961.4	4.22866	2.0802	0.00162818	2.7883
P15880_T278	RPS2	P15880	4215.19	3291.34	5280.24	0	0	0	0	#NUM!	0.00176306	2.75373
Q13435_S307	SF3B2	Q13435	14252.7	16284.2	14521.5	9411.93	9393.96	7731.82	0.588964	-0.763749	0.00187748	2.72642
Q9UBM7_S14	DHCR7	Q9UBM7	21152	21607.9	25265.1	33358.8	32314.1	34810.2	1.47715	0.562816	0.00190721	2.7196
Q5VT52_S1099	RPRD2	Q5VT52	3611.96	1993.41	2689.77	8635.59	10775.9	8327.53	3.344	1.74158	0.00198217	2.70286
Q16204_S417	CCDC6	Q16204	25769.8	36215.3	42618.4	0	0	0	0	#NUM!	0.00207737	2.68249
Q9UQ35_S1110	SRRM2	Q9UQ35	60127.4	72712.1	43471.2	0	0	0	0	#NUM!	0.00226398	2.64513
P67809_Y162	YBX1	P67809	59595.8	41551	42604.2	4747.47	0	8346.16	0.0910854	-3.45664	0.00233434	2.63184
O43852_Y47	CALU	O43852	13388.6	10039.8	10375	0	3123.81	0	0.0924111	-3.43579	0.00235576	2.62787
P23193_S97	TCEA1	P23193	20803.5	35032.6	27306.6	0	0	0	0	#NUM!	0.00252701	2.59739
Q9UQ35_S1762	SRRM2	Q9UQ35	0	0	0	11977.5	7438.53	12302.8	#DIV/0!	#DIV/0!	0.00253334	2.59631
Q9UQ35_S1764	SRRM2	Q9UQ35	0	0	0	11977.5	7438.53	12302.8	#DIV/0!	#DIV/0!	0.00253334	2.59631
Q9P2N5_S120	RBM27	Q9P2N5	14956.9	15369.6	17416.2	10862.4	10982.1	10269.1	0.672638	-0.572098	0.00276049	2.55901
Q7Z4V5_S625	HDGFL2	Q7Z4V5	27087	28426.8	26735.5	16337.2	19887.1	14832.8	0.62076	-0.687892	0.00278991	2.55441
Q15477_S256	SKIC2	Q15477	39089.4	42635.4	40656	25865.6	15568.8	19614.9	0.498847	-1.00333	0.00296117	2.52854
P22626_S102	HNRNPA2B1	P22626	14904.9	16288.9	16541.7	12385.1	12563.9	12736.8	0.789471	-0.341041	0.00296118	2.52853
Q6KC79_T599	NIPBL	Q6KC79	5590.12	4216.67	7308.14	0	0	0	0	#NUM!	0.00309764	2.50897
O95810_S288	CAVIN2	O95810	5615.49	7314.31	4827.51	1361.3	0	0	0.0766614	-3.70536	0.00317883	2.49773
Q9UJV9_S21	DDX41	Q9UJV9	10879.1	14429	10633.5	4276.81	1265.37	2301	0.21822	-2.19615	0.00344716	2.46254
Q9NYV4_T893	CDK12	Q9NYV4	14230	13326.9	10395.7	4608.08	5215.62	6029.36	0.417706	-1.25944	0.00388994	2.41006
Q5T1M5_S344	FKBP15	Q5T1M5	13698.7	14338.8	15206.2	20609.1	22958.6	19478	1.45792	0.543909	0.00406864	2.39055
Q96AT1_T32	KIAA1143	Q96AT1	6605.56	11708.8	8167.93	0	0	0	0	#NUM!	0.00426608	2.36997
Q96AT1_T35	KIAA1143	Q96AT1	6605.56	11708.8	8167.93	0	0	0	0	#NUM!	0.00426608	2.36997
Q96AT1_Y27	KIAA1143	Q96AT1	6605.56	11708.8	8167.93	0	0	0	0	#NUM!	0.00426608	2.36997
Q96PU5_S448	NEDD4L	Q96PU5	0	0	0	5618.19	9558.58	10509.9	#DIV/0!	#DIV/0!	0.00462836	2.33457
O00470_S196	MEIS1	O00470	23465.7	28588.1	25600.6	7415.32	13720.9	13513.4	0.446203	-1.16423	0.00489775	2.31
Q9UK61_S673	TASOR	Q9UK61	12637.9	13750.1	12619.5	10515.6	10050.2	9104.9	0.760642	-0.39471	0.00508418	2.29378
Q8IY92_S1452	SLX4	Q8IY92	0	0	0	10367.2	5673.76	10519.2	#DIV/0!	#DIV/0!	0.005101	2.29234
Q9H0E9_S387	BRD8	Q9H0E9	7994.3	6670.4	7679.68	10011.6	10573.4	9674.31	1.35422	0.437466	0.00525001	2.27984
Q8N201_S1318	INTS1	Q8N201	3476.83	5729.22	6432.71	11702.3	16289	15851.2	2.80345	1.4872	0.00535694	2.27108
Q09666_S5077	AHNAK	Q09666	59780.3	53162.4	48796	37479.7	33526.3	35484.8	0.658413	-0.602936	0.00557587	2.25369
Q12888_S1317	TP53BP1	Q12888	6590.56	11154.7	12899.4	0	0	0	0	#NUM!	0.00557619	2.25366
Q13469_S217	NFATC2	Q13469	27574.2	39254.3	20763.6	0	0	0	0	#NUM!	0.00566294	2.24696
Q13469_S221	NFATC2	Q13469	27574.2	39254.3	20763.6	0	0	0	0	#NUM!	0.00566294	2.24696
Q01130_S101	SRSF2	Q01130	5018.91	5391.33	7231.01	0	2041.62	0	0.11573	-3.11116	0.00573048	2.24181
P61073_S351	CXCR4	P61073	0	0	5572.41	13995.4	11213.9	14359.9	7.10092	2.82801	0.00576979	2.23884
Q99490_S927	AGAP2	Q99490	0	3368.59	0	7623.74	7763.09	6771.08	6.5778	2.7176	0.00578185	2.23793
Q8IWB9_S266	TEX2	Q8IWB9	12870.6	19831.9	12593.2	0	0	3334.57	0.0736178	-3.7638	0.00589786	2.22931
Q86VM9_T677	ZC3H18	Q86VM9	13008.2	9460.18	11455.3	0	4125.01	3518.89	0.225327	-2.14991	0.00599291	2.22236
Q13586_S257	STIM1	Q13586	11267.3	11465.4	9261.76	7077.51	6074.88	6865.02	0.625652	-0.676567	0.00649636	2.18733
O00160_S1023	MYO1F	O00160	52200.7	51809	46925.4	34930.7	40553.1	33646.4	0.723027	-0.467878	0.00683645	2.16517
Q6VY07_S529	PACS1	Q6VY07	19576.3	27009.8	13487	0	0	0	0	#NUM!	0.00688057	2.16238
Q8N9T8_S136	KRI1	Q8N9T8	17049.8	18311.2	16639.8	6207.06	9878.28	11319.8	0.527014	-0.924087	0.00691139	2.16043
Q5SW79_S881	CEP170	Q5SW79	5743.62	3573.36	8234.21	12772.1	13195.1	12467.5	2.18986	1.13084	0.00694677	2.15822
Q15032_S262	R3HDM1	Q15032	5538.55	0	0	15694.9	16205.6	11005.3	7.74676	2.95359	0.00736542	2.1328
Q9NYJ8_S524	TAB2	Q9NYJ8	0	0	0	2758.05	3156	1512.9	#DIV/0!	#DIV/0!	0.00747766	2.12623
P05023_S16	ATP1A1	P05023	9297.89	9108.38	8994.99	6425.1	7731.12	6327.83	0.747558	-0.419742	0.00748025	2.12608
Q14160_T475	SCRIB	Q14160	6909.76	8077.15	9345.13	4463.18	4624.17	3503.19	0.517447	-0.950517	0.00758278	2.12017
Q9Y2F5_S1692	ICE1	Q9Y2F5	1273.87	1150	1233.3	2277.53	2990.49	3433.32	2.37926	1.25051	0.0076781	2.11475
Q9UPU5_S1299	USP24	Q9UPU5	5605.68	5499.1	5405.7	9336.99	7332.94	8413.26	1.51923	0.603339	0.00798601	2.09767
Q9H019_S103	MTFR1L	Q9H019	64822.4	61675.2	59977.4	52371.5	50739.2	45201.6	0.795347	-0.330343	0.00800728	2.09652
Q8N6H7_S432	ARFGAP2	Q8N6H7	4012.25	3498.54	4490.16	8941.03	8474.45	6474.74	1.99069	0.993271	0.00804415	2.09452
Q9NY61_S203	AATF	Q9NY61	3923.42	4272.43	6465.91	9317.7	8722.83	8620.23	1.81839	0.86266	0.00834747	2.07844
Q9UKV3_S216	ACIN1	Q9UKV3	236212	280876	279685	118994	180870	159598	0.576653	-0.794224	0.00855542	2.06776
Q9NS91_S158	RAD18	Q9NS91	13402.6	12063.1	11614.4	7744.73	6658.12	9269.17	0.638401	-0.647465	0.00856063	2.06749
Q05519_S449	SRSF11	Q05519	221092	237684	207419	159101	157790	181532	0.748164	-0.418574	0.00866983	2.06199
Q9BRL6_S173	SRSF8	Q9BRL6	19519.4	30534.1	19731.9	6742.4	0	3677.61	0.149315	-2.74357	0.00867344	2.06181
P22392_S120	NME2	P22392	5397.08	6616.94	6625.8	4016.15	4245.4	3347.95	0.622833	-0.683083	0.00869046	2.06096
Q00059_S193	TFAM	Q00059	8124.48	7392.29	7554.4	5607.59	5883.6	4412.25	0.689321	-0.536752	0.00898164	2.04664
P62753_S240	RPS6	P62753	2290050	2.39247e+06	2164852	1614330	1.88723e+06	1.83382e+06	0.779186	-0.35996	0.009035	2.04407
P30414_S463	NKTR	P30414	8218.23	9492.1	6081.9	12626.6	12438.2	13035.6	1.60138	0.679316	0.00916904	2.03768
Q9UKX7_S221	NUP50	Q9UKX7	7952.95	8298.12	9547.62	12229.2	10937.8	12716.1	1.39089	0.476009	0.00945562	2.02431
O75122_S455	CLASP2	O75122	18294.4	23282.8	21841.6	5619.45	13113.6	8263.66	0.425688	-1.23213	0.0101466	1.99368
Q16204_S419	CCDC6	Q16204	51714.5	35808.7	56182.5	15828.3	14791	22387.3	0.368855	-1.43887	0.0103076	1.98684
P18858_S201	LIG1	P18858	18420.6	27753	21373.4	34331.6	35376.3	37854.5	1.5924	0.671207	0.010589	1.97515
Q8IU81_S384	IRF2BP1	Q8IU81	60735	65942.7	67104.6	44053.2	47689.2	54138.8	0.75281	-0.409642	0.0107373	1.9691
O15047_S464	SETD1A	O15047	70169.6	86689.1	66931.3	29362.8	44860.1	43718.6	0.527019	-0.924074	0.0110721	1.95577
P36021_S8	SLC16A2	P36021	1769	2216.05	0	4658.06	4967.38	4069.41	3.43655	1.78096	0.0111791	1.95159
Q9Y3S2_S291	ZNF330	Q9Y3S2	0	1986.69	1545.69	6826.72	9199.47	5133.43	5.99018	2.5826	0.0113568	1.94474
Q7Z3B3_S249	KANSL1	Q7Z3B3	7880.78	7344.62	7852.98	8481.18	9027.51	9146.34	1.15498	0.207867	0.0113919	1.9434
P17544_T326	ATF7	P17544	8234.55	8120.4	7962.97	3558.33	5319.04	5952.57	0.609836	-0.713507	0.0117896	1.9285
P16284_S647	PECAM1	P16284	5019.02	6024.48	5230.77	7880.85	10557.8	8851.39	1.67688	0.74578	0.0119632	1.92215
Q9UQ35_S901	SRRM2	Q9UQ35	313286	409360	307433	144401	210185	118469	0.459242	-1.12267	0.012329	1.90907
Q15052_S640	ARHGEF6	Q15052	162430	175371	170962	223313	204568	196186	1.22664	0.294708	0.0123349	1.90886
Q8IZP0_S225	ABI1	Q8IZP0	0	0	0	6739.59	7998.7	14053	#DIV/0!	#DIV/0!	0.0131436	1.88128
Q9UKM9_T286	RALY	Q9UKM9	279710	305073	249902	210804	198754	214862	0.748091	-0.418715	0.013622	1.86576
P29590_S504	PML	P29590	56107.3	62179.7	58700.3	40718.1	14940.2	23592.1	0.447774	-1.15916	0.0138092	1.85983
Q5T4S7_S2719	UBR4	Q5T4S7	59527.1	64471.1	65049.9	45283.5	54212.5	44033.8	0.759224	-0.397403	0.014217	1.84719
P21796_S104	VDAC1	P21796	16041.8	19302.3	17995.7	24127.2	21399.1	23363.5	1.29153	0.36908	0.0142253	1.84694
P52948_S888	NUP98	P52948	56484.8	59440.1	65563.6	83792.4	72283.8	78547.5	1.29277	0.37047	0.0142588	1.84592
Q5T200_S207	ZC3H13	Q5T200	135927	124430	109993	90249.4	92677.1	93617.1	0.74671	-0.421379	0.014482	1.83917
Q6PJG2_S996	MIDEAS	Q6PJG2	5565.11	6975.41	8458.98	0	3465.64	0	0.165035	-2.59916	0.0148585	1.82803
Q8NE71_S22	ABCF1	Q8NE71	4990.15	0	5935.2	25944.1	29613.2	14762.1	6.43635	2.68624	0.0148749	1.82755
Q14149_S560	MORC3	Q14149	3835.05	4487.4	5046.22	6448.73	6534.47	5711.46	1.39839	0.483769	0.0152842	1.81576
P67809_S165	YBX1	P67809	93391.4	79565.8	98492.5	64815.4	68621.6	68184.6	0.742758	-0.429035	0.0157758	1.80201
Q9UQ80_T386	PA2G4	Q9UQ80	7094.42	9977.85	8787.87	12330.4	12976	15285.6	1.56967	0.650464	0.0160843	1.7936
Q13428_S233	TCOF1	Q13428	23506.7	15369.2	16038	4817.8	5809.1	9214.79	0.361324	-1.46864	0.0162357	1.78953
Q86VM9_S487	ZC3H18	Q86VM9	65178.7	77843.7	61894.1	25794.3	44843.8	42276	0.551026	-0.859809	0.01635	1.78648
O15417_S1138	TNRC18	O15417	7886.45	12913.7	5424.45	0	0	0	0	#NUM!	0.0165866	1.78024
Q9NYF8_S268	BCLAF1	Q9NYF8	103051	130954	97756.3	36527.1	71211.5	53471.7	0.485923	-1.0412	0.0167052	1.77715
Q2NKX8_S1028	ERCC6L	Q2NKX8	3085.81	0	0	6945.47	5836.19	4709.57	5.66828	2.50291	0.0167584	1.77577
Q15555_S223	MAPRE2	Q15555	14013	18750.7	10539.2	0	0	6143.75	0.141879	-2.81727	0.0168865	1.77246
Q09666_S212	AHNAK	Q09666	34697.8	86427	56377.3	0	0	0	0	#NUM!	0.0168883	1.77241
P29590_S512	PML	P29590	21844.2	25172.8	24641.3	4222.14	14644.7	0	0.263289	-1.92528	0.017042	1.76848
Q86WR7_S179	PROSER2	Q86WR7	31515.1	29359.5	29575.9	26275	21272.1	24044.8	0.791503	-0.337333	0.0171588	1.76551
O75909_S329	CCNK	O75909	164985	246682	208492	92390.9	119487	115463	0.527834	-0.921842	0.0176287	1.75378
Q96AT1_S146	KIAA1143	Q96AT1	30913.1	42293.3	27814.5	51946.6	51161.6	60862.7	1.62314	0.698785	0.0176475	1.75332
Q9NSI8_S23	SAMSN1	Q9NSI8	142149	141645	115910	72474.5	99776.1	90422	0.657167	-0.605669	0.0179754	1.74532
P08559_S293	PDHA1	P08559	189263	237566	221994	92337.5	159160	93667	0.531984	-0.910544	0.0182097	1.7397
Q9UQ35_T903	SRRM2	Q9UQ35	446460	337394	252427	110143	151980	69185.3	0.319709	-1.64517	0.0182973	1.73761
Q8IV04_S438	TBC1D10C	Q8IV04	15954.4	16345.2	14884.9	11314.9	13727.3	12694.1	0.799761	-0.32236	0.0187378	1.72728
P16615_S663	ATP2A2	P16615	14149.3	16057.6	15000.5	20216.3	17695.7	21451.2	1.31313	0.393011	0.018779	1.72633
Q9UQ35_S908	SRRM2	Q9UQ35	363747	478933	326534	200594	221926	119515	0.463589	-1.10908	0.0196296	1.70709
Q7Z401_S1587	DENND4A	Q7Z401	9556.51	7178.87	7308.68	4614.11	0	0	0.191902	-2.38156	0.0197121	1.70527
Q86YS7_S305	C2CD5	Q86YS7	9151.28	17146.7	13643.7	0	0	5835.11	0.146091	-2.77506	0.019758	1.70426
Q14643_S1598	ITPR1	Q14643	27822.5	27868.7	32685.5	18360.8	21611	23525.9	0.718489	-0.476962	0.0198472	1.7023
O15417_S1136	TNRC18	O15417	0	0	0	5809.53	14216.9	8130.24	#DIV/0!	#DIV/0!	0.0200517	1.69785
Q5SW79_S958	CEP170	Q5SW79	3327.72	4338.88	2978.92	4985.07	6318.92	5632.41	1.59094	0.669881	0.0201468	1.69579
Q9UGU0_S1005	TCF20	Q9UGU0	5175.77	6239.35	6638	4074.48	4500.18	4385.01	0.717863	-0.478219	0.0202066	1.69451
Q8NF50_S2077	DOCK8	Q8NF50	78526.4	71099	52162.5	12690	38850.3	28080.2	0.394575	-1.34163	0.0203054	1.69239
Q8NF50_S2082	DOCK8	Q8NF50	78526.4	71099	52162.5	12690	38850.3	28080.2	0.394575	-1.34163	0.0203054	1.69239
Q99549_S164	MPHOSPH8	Q99549	14279	16027.1	13414.9	5416.73	9291.92	10296	0.571913	-0.806133	0.0203636	1.69115
Q5VYS8_S1404	TUT7	Q5VYS8	39766.1	31433.3	34911.3	23523.9	26891	26361.9	0.723555	-0.466826	0.020585	1.68645
Q5VYS8_T1405	TUT7	Q5VYS8	39766.1	31433.3	34911.3	23523.9	26891	26361.9	0.723555	-0.466826	0.020585	1.68645
Q8NEY8_S205	PPHLN1	Q8NEY8	108281	137039	102241	33538.7	61223.6	74177.3	0.486072	-1.04076	0.020829	1.68133
Q9Y2W1_S672	THRAP3	Q9Y2W1	16330.7	26143.9	3874.46	37212.9	40089.8	45726.6	2.65441	1.40839	0.0208714	1.68045
Q9NUN5_S528	LMBRD1	Q9NUN5	4431.6	6344.89	5445.14	0	3137.52	0	0.193416	-2.37022	0.0210726	1.67628
Q8WZ73_S229	RFFL	Q8WZ73	5807.83	0	0	8968.38	18019.1	14934.4	7.21816	2.85163	0.0215379	1.6668
Q9HDC5_S479	JPH1	Q9HDC5	12875.7	20901	19513	5933.67	10145.3	6339.54	0.420691	-1.24917	0.0216984	1.66357
O75592_S3505	MYCBP2	O75592	14498.5	17441.5	17394.4	20245.6	19685	20272.7	1.22031	0.28725	0.0217229	1.66308
O14545_S415	TRAFD1	O14545	49966.4	47229.1	55048.4	41553.1	42773.8	37562.9	0.800622	-0.320807	0.0219515	1.65853
P26038_T558	MSN	P26038	62050.7	29062.9	37387.5	2510.71	1929.49	11145.8	0.121291	-3.04345	0.021984	1.65789
Q12888_T1055	TP53BP1	Q12888	0	26756.5	0	44091	37582	50227.2	4.92966	2.30149	0.0220277	1.65703
Q9HDC5_S475	JPH1	Q9HDC5	14739.1	23331.4	22573.5	8389.93	11325	9632.83	0.483935	-1.04711	0.0221936	1.65377
Q14966_S605	ZNF638	Q14966	4261.52	2742.17	4418.89	1776.78	1388.42	0	0.2771	-1.85152	0.0222666	1.65235
Q8IUD2_S17	ERC1	Q8IUD2	9524.2	12705.6	11936.3	2679.37	0	7002.72	0.283383	-1.81917	0.0223371	1.65097
Q8IUD2_S21	ERC1	Q8IUD2	9524.2	12705.6	11936.3	2679.37	0	7002.72	0.283383	-1.81917	0.0223371	1.65097
P49736_S27	MCM2	P49736	653894	663101	582974	523814	551882	492855	0.825567	-0.276543	0.022361	1.65051
Q9H4L7_S211	SMARCAD1	Q9H4L7	14226.5	15369	9737.18	0	0	7231.49	0.183854	-2.44337	0.0224696	1.6484
Q9H4L7_S214	SMARCAD1	Q9H4L7	14226.5	15369	9737.18	0	0	7231.49	0.183854	-2.44337	0.0224696	1.6484
P61073_S344	CXCR4	P61073	15184	16882.9	15098.8	6864.07	0	9353.28	0.343838	-1.5402	0.0225272	1.64729
P61073_S346	CXCR4	P61073	15184	16882.9	15098.8	6864.07	0	9353.28	0.343838	-1.5402	0.0225272	1.64729
P38432_T570	COIL	P38432	25849.5	17553.3	27301.4	9796.62	11037.7	0	0.294669	-1.76283	0.0229016	1.64013
Q9UQ35_S1878	SRRM2	Q9UQ35	122729	155944	114766	60119.7	93119	60291.8	0.542729	-0.881697	0.0230061	1.63816
Q9UQ35_T1880	SRRM2	Q9UQ35	122729	155944	114766	60119.7	93119	60291.8	0.542729	-0.881697	0.0230061	1.63816
Q53SF7_T260	COBLL1	Q53SF7	7023.05	8570.12	7845	2772.57	5843.14	4127.43	0.543692	-0.87914	0.0230701	1.63695
P61978_S214	HNRNPK	P61978	0	2499.08	0	4697.2	4081.88	3423.91	4.88299	2.28776	0.023747	1.62439
Q86V48_S394	LUZP1	Q86V48	0	0	0	7638.01	9919.44	18845.2	#DIV/0!	#DIV/0!	0.02383	1.62288
Q00722_S953	PLCB2	Q00722	8732.27	3666.89	8579.09	12040.1	16734.7	15120.4	2.09241	1.06517	0.0240712	1.6185
Q6Y7W6_T382	GIGYF2	Q6Y7W6	17478.4	19152.7	19858.5	23158.9	22415.3	20990.9	1.17836	0.236779	0.0241248	1.61754
P46940_S1443	IQGAP1	P46940	13182.3	13699.7	10816	9207.2	7926.7	9672.73	0.711089	-0.491899	0.0243297	1.61386
Q8TD16_S568	BICD2	Q8TD16	36948.3	33040.3	16491.7	5181.21	5344.5	8726.62	0.222621	-2.16734	0.0245624	1.60973
Q8TD16_T573	BICD2	Q8TD16	36948.3	33040.3	16491.7	5181.21	5344.5	8726.62	0.222621	-2.16734	0.0245624	1.60973
Q7Z2W4_S257	ZC3HAV1	Q7Z2W4	2077.24	2773.64	2117.08	5868.96	12735.4	9400.4	4.01908	2.00686	0.0245725	1.60955
Q96JM3_S632	CHAMP1	Q96JM3	37503.9	46791.8	41733.5	29550.1	33711.1	31783.6	0.754148	-0.40708	0.0246488	1.6082
P30622_S348	CLIP1	P30622	4267.71	4720.9	5107.22	6189.93	5419.13	6042.84	1.25228	0.324555	0.024888	1.60401
Q6ZWK4_S82	RHEX	Q6ZWK4	31720.3	32244	29418.6	12731	23271.3	7149.19	0.462093	-1.11374	0.0252593	1.59758
Q14498_S127	RBM39	Q14498	324407	348351	283593	233448	252056	185808	0.701951	-0.510558	0.0254103	1.59499
Q14498_S129	RBM39	Q14498	324407	348351	283593	233448	252056	185808	0.701951	-0.510558	0.0254103	1.59499
Q96PU5_S446	NEDD4L	Q96PU5	6635.41	8777.26	7540.96	4862.03	0	0	0.211819	-2.23909	0.0254714	1.59395
Q9UHD8_S30	SEPTIN9	Q9UHD8	16752.1	20251.1	18628.2	23597.1	29857.8	24783.4	1.40637	0.491975	0.0255172	1.59317
P11388_S1393	TOP2A	P11388	0	0	9843.98	13580.1	20252.5	15819.9	5.04395	2.33455	0.0255487	1.59263
Q8WUM4_S642	PDCD6IP	Q8WUM4	11732.7	10674.2	12864.5	6269.44	6825.83	9599.89	0.643444	-0.636114	0.0256218	1.59139
P08559_S300	PDHA1	P08559	188552	259536	206355	76403.3	153851	78272.4	0.471434	-1.08487	0.0256292	1.59126
Q9Y4A5_S2077	TRRAP	Q9Y4A5	17686.9	18777.1	17588.2	20403.5	24787.7	25090.8	1.30026	0.378801	0.0257159	1.5898
O94888_S280	UBXN7	O94888	43128.1	58218.6	46615.2	25542.2	27089.1	3637.12	0.38029	-1.39483	0.0258796	1.58704
O75592_S3478	MYCBP2	O75592	7165.99	8196.73	7181.26	4665.2	6166.59	5825.91	0.738898	-0.436553	0.025979	1.58538
Q9UGN4_S260	CD300A	Q9UGN4	6782.49	6516.87	7282.85	10610	9339.56	8195.41	1.36744	0.451479	0.0262695	1.58055
Q9Y2F5_S126	ICE1	Q9Y2F5	11529.5	9125.16	13958	0	6901.7	0	0.199398	-2.32628	0.0264594	1.57742
Q9UQ35_S2702	SRRM2	Q9UQ35	186554	212142	182017	97781.1	156938	125257	0.654326	-0.611918	0.0264802	1.57708
Q96L73_S2471	NSD1	Q96L73	3160.47	3408.38	4294.32	0	2278.35	0	0.209732	-2.25338	0.0264861	1.57698
Q8N573_S452	OXR1	Q8N573	4386.72	7312.75	2535.59	0	0	0	0	#NUM!	0.0269747	1.56904
Q5JSH3_S561	WDR44	Q5JSH3	10858.7	10777.1	11103.4	14923.2	12662.6	12753.1	1.23213	0.30115	0.0273154	1.56359
Q32MZ4_S714	LRRFIP1	Q32MZ4	13084.7	14011.5	12677.3	15903.5	15053.5	17687.6	1.22304	0.290468	0.0273845	1.5625
Q9UK58_S341	CCNL1	Q9UK58	0	0	4648.61	13311.6	30096.2	16157.7	12.8136	3.6796	0.0277328	1.55701
Q32P44_S204	EML3	Q32P44	2984.77	3421.31	2045.4	4304.44	4906.99	4065.87	1.571	0.651687	0.0279623	1.55343
P16383_S174	GCFC2	P16383	19746.3	26975.5	17935.4	5367.04	13938	6139.35	0.393527	-1.34546	0.0282626	1.54879
P16383_S180	GCFC2	P16383	19746.3	26975.5	17935.4	5367.04	13938	6139.35	0.393527	-1.34546	0.0282626	1.54879
O94979_S1163	SEC31A	O94979	5650.08	5709.64	5317.51	6447.22	8286.33	7441.75	1.32967	0.411074	0.0282845	1.54845
Q13283_S149	G3BP1	Q13283	208008	299812	231715	52850.5	166362	71476.4	0.39307	-1.34714	0.0285182	1.54488
Q8N3D4_S1273	EHBP1L1	Q8N3D4	3651.86	5251.26	2995.07	0	1582.54	1695.78	0.27553	-1.85972	0.0293469	1.53244
Q9Y2W1_S575	THRAP3	Q9Y2W1	14021.1	19541.1	15868.5	26870.9	24750.2	21098.2	1.47114	0.556931	0.0294337	1.53116
Q9UBW7_S156	ZMYM2	Q9UBW7	47024.5	23554.5	10992.4	105368	66744.4	70589.8	2.97534	1.57305	0.0294952	1.53025
Q9UBW7_T150	ZMYM2	Q9UBW7	47024.5	23554.5	10992.4	105368	66744.4	70589.8	2.97534	1.57305	0.0294952	1.53025
Q9NSI8_S90	SAMSN1	Q9NSI8	41025.5	31931.8	43196.8	72913.3	58019.2	53188.2	1.58514	0.664611	0.0299433	1.5237
P20138_T303	CD33	P20138	26098.3	24750.8	17799	9743.12	0	12869.2	0.329394	-1.60211	0.0299473	1.52364
Q5T8P6_S127	RBM26	Q5T8P6	48965.1	45661.1	61034.5	21340.9	37825.6	30470.1	0.575847	-0.796244	0.0300221	1.52256
Q9UMZ2_S752	SYNRG	Q9UMZ2	3595.66	3796.09	4457.52	12259.6	12028.5	6458.18	2.59478	1.37561	0.0301991	1.52001
O43491_S715	EPB41L2	O43491	6588.07	7190.68	6954.02	7977.51	7693.95	7414.89	1.11352	0.155127	0.0304142	1.51692
P67809_S314	YBX1	P67809	80726.3	96081	93719.3	116511	104999	107343	1.2156	0.281672	0.0304873	1.51588
Q14157_S604	UBAP2L	Q14157	69968.1	71007.4	79289.8	50881.6	0	0	0.231001	-2.11403	0.0305076	1.51559
Q04721_S1778	NOTCH2	Q04721	12396.5	14445.6	12510.1	15401.5	17305.8	15538.8	1.22601	0.29397	0.0305666	1.51475
Q8N163_S675	CCAR2	Q8N163	11434.9	17819	5557.53	0	0	0	0	#NUM!	0.0305763	1.51462
Q02880_S1526	TOP2B	Q02880	15014.6	25051.4	21911.6	43914.5	87648.3	99827.5	3.73345	1.90051	0.0305882	1.51445
Q86YS7_S657	C2CD5	Q86YS7	42520.3	57829	27700.6	7394.2	19533.1	7448.94	0.268459	-1.89722	0.03119	1.50599
O95218_Y183	ZRANB2	O95218	11772.3	12919.2	5737.13	0	935.01	4352.57	0.17377	-2.52475	0.0318344	1.4971
Q9C0B5_S380	ZDHHC5	Q9C0B5	23260.4	22167	19123.4	17931.3	17123.3	15248.4	0.779279	-0.359789	0.0320072	1.49475
Q9BT23_S29	LIMD2	Q9BT23	64461.1	46546.9	48632.6	36869.7	33202.8	33811.8	0.650739	-0.61985	0.0322239	1.49182
Q9Y2U8_S144	LEMD3	Q9Y2U8	7848.62	0	0	9627.93	12334.9	12736.9	4.42113	2.14441	0.0327368	1.48496
Q99590_S816	SCAF11	Q99590	2865.72	10272.1	8107.36	24944.3	63265.1	41530.8	6.1068	2.61042	0.0329868	1.48166
P50749_S145	RASSF2	P50749	18234.9	10658.7	9787.15	3221.6	1989.09	5716.29	0.282492	-1.82372	0.0331389	1.47966
Q99590_S818	SCAF11	Q99590	1563.18	5740.8	4422.37	13606.5	34509.6	22654.1	6.03514	2.59339	0.0333306	1.47716
P29590_S8	PML	P29590	6448.19	8988.43	8938.12	14922.8	16311.6	10794.5	1.72428	0.785993	0.0338864	1.46997
P32519_S163	ELF1	P32519	41381.3	47724.5	48867.2	52904.3	53106.3	54876.9	1.16608	0.221666	0.0339282	1.46944
Q9UNL2_S105	SSR3	Q9UNL2	15769.1	29774.7	38439.3	52329.5	45353.7	58083.2	1.85473	0.891213	0.0340299	1.46814
O75533_T244	SF3B1	O75533	60245.2	93063.4	50957.2	5874.8	36470.4	0	0.207304	-2.27018	0.0340431	1.46797
Q53SF7_S256	COBLL1	Q53SF7	10298	12885	10859.8	5508.26	9056.87	7265.86	0.64128	-0.640973	0.0344109	1.4633
Q92504_S275	SLC39A7	Q92504	9533.07	13684.2	6713.63	17341	29510.5	21532.4	2.28472	1.19202	0.0354014	1.45098
Q92504_S276	SLC39A7	Q92504	9533.07	13684.2	6713.63	17341	29510.5	21532.4	2.28472	1.19202	0.0354014	1.45098
Q9H8G2_S94	CAAP1	Q9H8G2	8369.94	10280.4	8050.21	3978.15	6957.78	5441.61	0.613378	-0.705151	0.035894	1.44498
P20138_S307	CD33	P20138	29732.5	30708.6	16021.5	9662.67	6077.29	12886.8	0.374388	-1.41739	0.0359979	1.44372
Q9UQ35_S1694	SRRM2	Q9UQ35	464026	502215	668998	343282	276892	372743	0.607199	-0.719759	0.0361493	1.4419
Q96ST2_S511	IWS1	Q96ST2	182553	211528	139370	28234.7	112346	89011.7	0.430391	-1.21628	0.0362462	1.44074
Q96ST2_S513	IWS1	Q96ST2	182553	211528	139370	28234.7	112346	89011.7	0.430391	-1.21628	0.0362462	1.44074
Q8TF01_S290	PNISR	Q8TF01	4909.79	5205.85	1853.64	0	1265.18	0	0.105702	-3.24192	0.0362688	1.44047
Q13200_S361	PSMD2	Q13200	8207.87	9849.81	9229.95	11438.6	10305.6	12089	1.23988	0.310195	0.0368026	1.43412
Q5VSL9_S335	STRIP1	Q5VSL9	37588.9	41419.8	37177.8	42543.4	50550.6	49879.7	1.23055	0.299307	0.0369116	1.43284
Q9NTI5_S1166	PDS5B	Q9NTI5	25847.1	32748.7	24863.9	17500	20778.5	20383.5	0.702879	-0.508652	0.0370787	1.43088
P07814_S883	EPRS1	P07814	95275.4	124733	89813.2	52247	59348	0	0.360192	-1.47316	0.037836	1.4221
Q15388_S138	TOMM20	Q15388	12943.7	12572.1	10352.5	14113.2	15215.7	16763.5	1.28504	0.361816	0.0378801	1.42159
P78347_S16	GTF2I	P78347	14660.4	18616.4	18183.3	21586.5	23324.1	28369.1	1.42401	0.509963	0.0382299	1.4176
O75971_S96	SNAPC5	O75971	9766.84	11312.4	6843.41	0	4623.28	4717.23	0.334514	-1.57986	0.0382618	1.41724
Q9H7F0_S817	ATP13A3	Q9H7F0	4954.64	5065.5	6327.97	10370.5	9294.99	6889.75	1.62436	0.699874	0.0384091	1.41557
Q6P2E9_S871	EDC4	Q6P2E9	20333.3	20797.5	19734.3	23827.7	34370	31203.5	1.46884	0.554679	0.0387419	1.41182
P30622_S195	CLIP1	P30622	8348.99	6764.24	8669.8	2909.97	4756.93	6117.68	0.579597	-0.786877	0.0388339	1.41079
Q96PC5_S1255	MIA2	Q96PC5	6991.53	10090.9	8642.94	20455.1	17606.1	11884.2	1.94148	0.95716	0.0392136	1.40656
P49736_S26	MCM2	P49736	210269	229150	167343	104403	160735	109630	0.617653	-0.695132	0.0393084	1.40551
O94913_S370	PCF11	O94913	71054	79146.4	48959.5	16426.8	45273.8	25361.7	0.437148	-1.19381	0.0395395	1.40297
Q96BY6_T1440	DOCK10	Q96BY6	4554.09	3875.74	5413.71	0	3256.83	0	0.23526	-2.08767	0.0396387	1.40188
Q92556_S342	ELMO1	Q92556	16175.1	0	0	21628.6	20969.6	22312	4.01297	2.00467	0.0397369	1.40081
Q9Y2I7_S146	PIKFYVE	Q9Y2I7	70807.9	23723.4	54743.3	0	15913.7	0	0.106607	-3.22963	0.0398148	1.39996
Q7Z4S6_S1662	KIF21A	Q7Z4S6	5536.92	8432.72	5151.72	0	3982.91	0	0.208296	-2.26329	0.0400567	1.39732
Q9NYL2_S633	MAP3K20	Q9NYL2	8389.36	8304.77	7477.82	0	6003.68	0	0.248374	-2.00942	0.0401496	1.39632
Q8IYB3_S450	SRRM1	Q8IYB3	166942	192002	193575	104097	153066	141662	0.72183	-0.47027	0.0402733	1.39498
Q96T37_S656	RBM15	Q96T37	84682.3	93123.4	64923.8	30333.5	53983.6	54638.5	0.572472	-0.804724	0.0402938	1.39476
O95425_S245	SVIL	O95425	16282.5	16300	16178.3	16921.7	17327.2	18355.9	1.07883	0.109474	0.0403409	1.39425
P78347_S103	GTF2I	P78347	6330.12	7510.8	6124.13	11398.8	7980.8	10787.5	1.51099	0.595495	0.0403608	1.39404
O75122_S459	CLASP2	O75122	19053.6	20937.8	22722	5852.65	16929.3	8606.58	0.500507	-0.998537	0.0403977	1.39364
P42331_S362	ARHGAP25	P42331	39358.7	38106.4	32729	50916.2	53154.8	41906.3	1.32473	0.405697	0.0404853	1.3927
Q9ULX3_S201	NOB1	Q9ULX3	31796.3	30609.7	18289.7	77398.5	66085.7	40967.1	2.28576	1.19268	0.0406721	1.3907
Q15424_S601	SAFB	Q15424	10035.6	11383.5	9581.9	8113.78	9092.16	8216.51	0.820051	-0.286214	0.0406881	1.39053
O14646_S1683	CHD1	O14646	0	0	0	6314.43	12478.7	3940.48	#DIV/0!	#DIV/0!	0.0408107	1.38923
O14646_S1694	CHD1	O14646	0	0	0	6314.43	12478.7	3940.48	#DIV/0!	#DIV/0!	0.0408107	1.38923
Q13428_S156	TCOF1	Q13428	14087.2	15985.6	16235.8	12012.6	12913.3	8871.2	0.729824	-0.45438	0.0408177	1.38915
O15021_S353	MAST4	O15021	207730	246596	122972	45477.2	0	106119	0.262596	-1.92908	0.0409893	1.38733
Q13459_S1331	MYO9B	Q13459	4032.94	4246.82	8103.09	12440.9	25956.8	15920.5	3.31555	1.72925	0.0412751	1.38431
O14976_S815	GAK	O14976	14848.5	12395.2	5585.23	4619.58	0	0	0.140717	-2.82914	0.0412974	1.38408
O14976_S817	GAK	O14976	14848.5	12395.2	5585.23	4619.58	0	0	0.140717	-2.82914	0.0412974	1.38408
Q92797_S1243	SYMPK	Q92797	9955.89	11137	9471.83	8314.9	8840.91	7141.53	0.794946	-0.331071	0.0413986	1.38301
Q99590_S774	SCAF11	Q99590	18755.4	0	0	31193.1	28776	20707.5	4.3015	2.10484	0.0421963	1.37473
Q5JSH3_S96	WDR44	Q5JSH3	4092.46	4506.39	5154.96	7602.45	6839.83	5463.01	1.44726	0.53332	0.0425279	1.37133
Q9UJ41_T131	RABGEF1	Q9UJ41	15650.9	23768.9	25829.7	9656.41	0	12554.3	0.340397	-1.55471	0.0430284	1.36624
Q9H307_S690	PNN	Q9H307	4035.37	5587.55	2442.2	7496.47	8550.1	6108.73	1.83631	0.87681	0.0431257	1.36526
P26358_S714	DNMT1	P26358	165922	204211	223348	281625	251249	241882	1.30545	0.384542	0.0433411	1.3631
Q9P0K1_S834	ADAM22	Q9P0K1	3968.02	0	0	8580.68	7077.06	4285.56	5.02601	2.32941	0.0433789	1.36272
P01893_S350	HLA-H	P01893	5375.21	7587.74	5457.68	0	4327.55	0	0.23493	-2.0897	0.0436587	1.35993
Q96QE3_S817	ATAD5	Q96QE3	0	0	9203.83	11365.3	12192	12626.5	3.93138	1.97504	0.0436647	1.35987
A0A2R8Y4L2_S2	HNRNPA1L3	A0A2R8Y4L2	542383	509004	435234	357497	393143	419096	0.786842	-0.345855	0.0438372	1.35816
Q9C0C9_S515	UBE2O	Q9C0C9	5856.59	8881.52	5435.36	9819.45	9704.44	10169.9	1.47192	0.557702	0.0441236	1.35533
P36915_T50	GNL1	P36915	44144.9	44575.9	15649.3	11762.9	0	4110.77	0.15209	-2.717	0.0441281	1.35528
P16401_T11	H1-5	P16401	40246.1	51336.4	37480.1	28430.2	32924.7	29011.3	0.700174	-0.514214	0.0445502	1.35115
Q08495_S289	DMTN	Q08495	13165.3	12698.4	11455.7	0	9509.4	0	0.254811	-1.9725	0.0446832	1.34986
Q9UNN5_S582	FAF1	Q9UNN5	12587.2	13617.6	12968.6	11992.3	11798	10449.7	0.874063	-0.194191	0.0449566	1.34721
Q9Y4H2_S1149	IRS2	Q9Y4H2	11618.6	18611.9	12794.7	0	0	9620.49	0.223601	-2.161	0.0450549	1.34626
Q8TC05_S242	MDM1	Q8TC05	6082.36	5752.18	6040.25	0	4605.23	0	0.257638	-1.95658	0.0452471	1.34441
P14625_S306	HSP90B1	P14625	4144.44	9282.59	5534.66	25352.8	17917.3	11847	2.90676	1.53941	0.0453683	1.34325
Q9BW71_S223	HIRIP3	Q9BW71	132016	137589	110325	99266.7	107132	88892.8	0.777225	-0.363595	0.0457562	1.33955
Q9Y580_S204	RBM7	Q9Y580	9146.83	9862.48	9942.57	10340.4	12301.7	11785.5	1.18913	0.249908	0.0461302	1.33601
Q9UMZ2_S935	SYNRG	Q9UMZ2	6952.9	9612.62	7392.47	9859.52	10713.7	11446.4	1.33649	0.41845	0.0463066	1.33436
Q9Y2K7_S692	KDM2A	Q9Y2K7	3310.61	4374.62	6382.48	7235.84	7285.06	7222.36	1.54561	0.628181	0.0468575	1.32922
P49761_S9	CLK3	P49761	5347.22	4757.95	5712.07	4188.1	1369.07	2928.27	0.536468	-0.898435	0.0470013	1.32789
P12694_S337	BCKDHA	P12694	17630.6	18115.8	20436.9	9862.42	16219.4	12824.4	0.692486	-0.530143	0.0470418	1.32752
Q9BRD0_S222	BUD13	Q9BRD0	20182.8	20861	18232.6	6458.17	15905.8	12487.4	0.587947	-0.766243	0.0471112	1.32688
Q9BRD0_S226	BUD13	Q9BRD0	20182.8	20861	18232.6	6458.17	15905.8	12487.4	0.587947	-0.766243	0.0471112	1.32688
Q9H1E3_T179	NUCKS1	Q9H1E3	83812.8	89175.6	78799.5	90107.4	97410	99772.4	1.141	0.190298	0.047157	1.32645
P19338_S206	NCL	P19338	840452	981029	795050	708214	665407	735985	0.806261	-0.310682	0.0471592	1.32643
Q14157_S609	UBAP2L	Q14157	70201.3	79180.2	82978	66527.1	67502.8	65949	0.860645	-0.21651	0.0473858	1.32435
P29590_S505	PML	P29590	55488.2	54848.3	54450.7	11240.2	34680.5	41481.1	0.530393	-0.914868	0.0480908	1.31794
Q99081_S79	TCF12	Q99081	9119.12	8563.04	10687.4	6696.11	8186.48	6589.09	0.756855	-0.401911	0.0483993	1.31516
Q96P48_S229	ARAP1	Q96P48	0	4756.43	5268.8	8236.99	19278.2	12929.8	4.03431	2.01232	0.0484628	1.31459
Q9BPZ7_S512	MAPKAP1	Q9BPZ7	11285.2	10267.2	10040.1	8682.14	9373.18	7127.82	0.797124	-0.327124	0.0494334	1.30598
Q9UQ35_S2692	SRRM2	Q9UQ35	41889.2	43768.1	39576.5	21548	36460.3	29788.6	0.701064	-0.512383	0.0495354	1.30508
Q9Y520_S2105	PRRC2C	Q9Y520	17027.8	18292.5	16073.8	25852.8	19155.6	23705.9	1.33701	0.419006	0.0497888	1.30287
Q9C0C2_S836	TNKS1BP1	Q9C0C2	8231.51	9612.09	9023.66	11808.7	12623.9	9912.85	1.27834	0.354269	0.0498983	1.30191
Q2KHR2_T988	RFX7	Q2KHR2	4428.06	4573.21	5148.83	7078.04	6223.73	5359.92	1.31884	0.399267	0.050255	1.29882
Q8TB72_S587	PUM2	Q8TB72	13934.2	11666.7	13539.2	11484.7	9302.2	10532.8	0.800193	-0.321581	0.0505379	1.29638
O75533_T248	SF3B1	O75533	60298.3	92647.8	49210	6541.33	39800.1	21567.8	0.335925	-1.57379	0.0506809	1.29516
Q9GZT3_S102	SLIRP	Q9GZT3	40374	36487.8	34498.2	33492	30723.7	31174.2	0.85659	-0.223324	0.0507033	1.29496
Q9UDY2_S702	TJP2	Q9UDY2	4168.26	4185.52	3268.97	4548.53	4833.75	4899.1	1.22875	0.297186	0.0509191	1.29312
Q9Y3T9_S56	NOC2L	Q9Y3T9	159942	235548	153059	79704.9	123045	104088	0.559362	-0.838145	0.0511364	1.29127
Q13362_S497	PPP2R5C	Q13362	13681.9	14506.7	13104.1	5369.61	11774.3	8510.54	0.621282	-0.686679	0.0511977	1.29075
Q15032_S282	R3HDM1	Q15032	23794.3	17830.3	19918.7	12433.2	16113.5	15683.3	0.718679	-0.47658	0.0513461	1.28949
P05114_S89	HMGN1	P05114	41248.9	62846.1	43848	15806.1	35833.9	21902.3	0.497099	-1.0084	0.0515011	1.28818
O75962_S1785	TRIO	O75962	7705.31	11884.3	3448.86	0	2133.12	0	0.0925895	-3.43301	0.051537	1.28788
O75962_S1786	TRIO	O75962	7705.31	11884.3	3448.86	0	2133.12	0	0.0925895	-3.43301	0.051537	1.28788
O43149_S1473	ZZEF1	O43149	7463.04	11109.6	5561.15	0	0	4979.54	0.20633	-2.27697	0.0515719	1.28759
O43149_S1475	ZZEF1	O43149	7463.04	11109.6	5561.15	0	0	4979.54	0.20633	-2.27697	0.0515719	1.28759
Q96C57_S179	CUSTOS	Q96C57	8030.13	0	0	8132.35	13661.5	12093.9	4.22007	2.07727	0.0517296	1.28626
Q5JSP0_S128	FGD3	Q5JSP0	25759.4	24424.5	24669.5	14618.9	22715.4	13649.9	0.68112	-0.554018	0.0518703	1.28508
Q86Y82_S139	STX12	Q86Y82	54820	71703.3	39697.1	18455.2	35415.6	26358.5	0.482668	-1.0509	0.0519217	1.28465
Q86Y82_S142	STX12	Q86Y82	54820	71703.3	39697.1	18455.2	35415.6	26358.5	0.482668	-1.0509	0.0519217	1.28465
Q7Z2W4_S284	ZC3HAV1	Q7Z2W4	27360.7	36136.2	26923	42805	35984.4	41803.9	1.3337	0.415436	0.0521896	1.28242
Q96MU7_S424	YTHDC1	Q96MU7	0	0	2269.07	3104.27	8129.34	4679.36	7.013	2.81003	0.0524086	1.2806
Q14669_S312	TRIP12	Q14669	40737.8	44223.3	46721.4	49072.6	51237	58386.4	1.20514	0.269202	0.0527876	1.27747
P52948_T670	NUP98	P52948	13380.8	9590.85	17949.5	21848.9	20186.5	19452.5	1.50259	0.587456	0.0528575	1.27689
Q9Y232_S201	CDYL	Q9Y232	11777.5	11016.4	14032.7	8579.77	10059	9875.05	0.774273	-0.369086	0.0529183	1.27639
Q15366_S187	PCBP2	Q15366	16372.4	16300	17523.5	12125.8	0	8547.03	0.411843	-1.27983	0.0530185	1.27557
Q9BW71_S372	HIRIP3	Q9BW71	39057.4	42450.6	30427.2	17778.1	30609.3	20133.8	0.61215	-0.708043	0.0531287	1.27467
Q96JY6_T126	PDLIM2	Q96JY6	0	0	0	14809.7	3371.26	18075.6	#DIV/0!	#DIV/0!	0.053482	1.27179
O75563_S283	SKAP2	O75563	0	0	6392.48	11539.2	13658.9	6200.11	4.91174	2.29623	0.0535713	1.27107
O96028_T544	NSD2	O96028	9863.94	9020.85	8804.05	11088.9	9919.64	10478.6	1.13718	0.18546	0.0536205	1.27067
Q15052_S488	ARHGEF6	Q15052	41236.3	46271.1	49711.6	36027.7	38939.8	40069.4	0.838345	-0.254384	0.0541584	1.26633
Q92974_S121	ARHGEF2	Q92974	12640.8	7206.63	11488.1	4805.28	7045.95	4803.31	0.531489	-0.911887	0.0542343	1.26573
P19634_S703	SLC9A1	P19634	10086.9	5101.46	4392.03	15556.5	10242.3	12866.2	1.97468	0.981621	0.0542664	1.26547
Q15311_S645	RALBP1	Q15311	15299.7	16295.4	10657.2	0	10604.7	0	0.250985	-1.99433	0.0553269	1.25706
P21333_S2143	FLNA	P21333	16769.7	15648	18693.9	8411.81	11682.1	14723.9	0.681212	-0.553824	0.0553338	1.25701
Q53GS9_S82	USP39	Q53GS9	76351.6	75734.8	65962.9	33139.6	40238.3	64403.7	0.631883	-0.662272	0.0561516	1.25064
O00567_S519	NOP56	O00567	6108.08	8883.98	8188.13	12224.6	12142.5	9192.32	1.44776	0.533826	0.0563153	1.24937
P30043_S82	BLVRB	P30043	23478.6	24503.7	22143.9	24684	25834.9	26474.6	1.09793	0.134784	0.0564559	1.24829
P13796_S257	LCP1	P13796	63183.8	68178.6	62049.9	78724.9	68043.8	78650.4	1.16548	0.22093	0.0566119	1.24709
Q13263_S683	TRIM28	Q13263	12807.8	16082.1	15534.8	19144.5	16627.2	19075.3	1.23461	0.30405	0.0566162	1.24706
Q9NVU0_S162	POLR3E	Q9NVU0	12153.7	14130.1	6132.18	1846.82	2366.72	6182.04	0.320693	-1.64073	0.0567845	1.24577
P21127_S752	CDK11B	P21127	10483.4	15505	12324.9	0	0	9803.85	0.255886	-1.96643	0.0568008	1.24565
P46100_S849	ATRX	P46100	14536.8	10510.4	4477.74	0	2135.55	3047.95	0.175564	-2.50993	0.0568542	1.24524
P46100_S850	ATRX	P46100	14536.8	10510.4	4477.74	0	2135.55	3047.95	0.175564	-2.50993	0.0568542	1.24524
Q9UQ35_S1975	SRRM2	Q9UQ35	565731	648846	558949	263244	429454	492107	0.668051	-0.581971	0.0571863	1.24271
Q9Y490_T144	TLN1	Q9Y490	4934.33	3899.73	4616.55	0	3609.84	0	0.268377	-1.89767	0.0574591	1.24064
Q8TAQ2_T308	SMARCC2	Q8TAQ2	6030.28	11248.5	5687.86	2640.14	3667.96	0	0.274663	-1.86426	0.0576957	1.23886
O60930_S76	RNASEH1	O60930	6701.44	9704.65	11868.3	0	5013.67	5281.19	0.364105	-1.45757	0.0582083	1.23501
O94913_S372	PCF11	O94913	71830.1	84474.3	49243.4	16808.4	48997.9	30230.3	0.467222	-1.09782	0.0584665	1.23309
Q5T200_S209	ZC3H13	Q5T200	224706	230826	179643	143217	181014	156938	0.757538	-0.40061	0.058494	1.23289
Q13017_S1176	ARHGAP5	Q13017	35986.9	35336.3	25251.1	20140.4	23293.8	24149	0.699805	-0.514975	0.0585531	1.23245
Q8NDX1_S1019	PSD4	Q8NDX1	31770.5	30608.9	34170.9	22076	28210.6	14911.8	0.675279	-0.566444	0.0585811	1.23224
P23588_S597	EIF4B	P23588	48070.4	58145.9	43567.7	65987.6	60303.3	79344.6	1.37288	0.457206	0.0586881	1.23145
Q13017_S1173	ARHGAP5	Q13017	35986.9	35336.3	25251.1	20415.3	23293.8	24149	0.702651	-0.50912	0.0588293	1.23041
Q5UIP0_S1579	RIF1	Q5UIP0	19726	22194.2	20249.5	32328.3	23994.9	26260	1.32835	0.409637	0.0588889	1.22997
Q9UQ35_S454	SRRM2	Q9UQ35	72596.2	134240	63781.9	30825	35672.7	29610.8	0.355144	-1.49352	0.0590804	1.22856
Q53QZ3_S212	ARHGAP15	Q53QZ3	20684.2	32776.1	31891.6	46384.9	51023.5	35391.9	1.55592	0.637764	0.0592132	1.22758
P40306_S230	PSMB10	P40306	6589.6	4647.45	8272.09	0	4712.05	0	0.24153	-2.04972	0.0592473	1.22733
P45880_S115	VDAC2	P45880	7951.93	8415.99	7291.48	8516.91	8932.56	9105.2	1.12237	0.166552	0.0595404	1.22519
Q6KC79_S350	NIPBL	Q6KC79	8708.04	12287.9	6388.07	18541.5	17082.5	12090	1.7424	0.801074	0.0596472	1.22441
Q9BWT3_S648	PAPOLG	Q9BWT3	10941.2	12464.6	12111.9	10950.9	7722.41	8219.08	0.757154	-0.401341	0.059816	1.22318

## Sheet: DEPs Esel group
Index	Gene	Protein	Protein ID	Peptide	Best Localization Probability	3_1 MaxLFQ Intensity	3_2 MaxLFQ Intensity	3_3 MaxLFQ Intensity	ratio3/1	pValue3/1
Q9NSK0_S565	KLC4	sp|Q9NSK0|KLC4_HUMAN	Q9NSK0	RsSELLVR	0.9507	6916.36	6883.56	7123.18	#DIV/0!	8.02031e-08				202 Deps out of 446
O43660_S349	PLRG1	sp|O43660|PLRG1_HUMAN	O43660	CQAAEPQIItGsHDTTIR	0.7679	21522.1	22282.2	20832.7	#DIV/0!	8.52714e-07				202 elements included exclusively in "Esel/Unt":
O43660_T347	PLRG1	sp|O43660|PLRG1_HUMAN	O43660	CQAAEPQIItGsHDTTIR	0.7679	21522.1	22282.2	20832.7	#DIV/0!	8.52714e-07				PLRG1	O43660
Q8N573_S202	OXR1	sp|Q8N573|OXR1_HUMAN	Q8N573	VVSsTSEEEEAFTEK	0.9514	5580.25	5857.01	5376.92	#DIV/0!	2.26894e-06				OXR1	Q8N573
Q8WYP5_S1232	AHCTF1	sp|Q8WYP5|ELYS_HUMAN	Q8WYP5	ETRIsFVEEDVHPK;IsFVEEDVHPK	1	13006.1	13311	13125.1	2.26247	2.74729e-06				SRSF6	Q13247
Q14676_S485	MDC1	sp|Q14676|MDC1_HUMAN	Q14676	AHsEKDQPPFGDSDDSVEADK	0.9738	12188.4	12337.4	11800.3	2.34165	3.68758e-06				LRRC41	Q15345
O14974_S445	PPP1R12A	sp|O14974|MYPT1_HUMAN	O14974	TGsYGALAEITASK	0.9682	0	0	0	0	4.61074e-06				ABLIM1	O14639
Q13029_S747	PRDM2	sp|Q13029|PRDM2_HUMAN	Q13029	TSsPPSsPQHsPALR	0.9392	0	0	0	0	8.95466e-06				PPP1R9B	Q96SB3
Q92538_S1780	GBF1	sp|Q92538|GBF1_HUMAN	Q92538	AASsSSPGsPVASSPSR	0.8385	1719.46	0	0	0.0232832	1.60779e-05				CHAF1B	Q13112
Q5T8D3_S196	ACBD5	sp|Q5T8D3|ACBD5_HUMAN	Q5T8D3	AESSDsGAEsEEEEAQEEVK	0.9434	0	0	0	0	1.74426e-05				EIF3G	O75821
Q5T8D3_S200	ACBD5	sp|Q5T8D3|ACBD5_HUMAN	Q5T8D3	AESSDsGAEsEEEEAQEEVK	0.9438	0	0	0	0	1.74426e-05				NOB1	Q9ULX3
Q7LBC6_S798	KDM3B	sp|Q7LBC6|KDM3B_HUMAN	Q7LBC6	RFsLDER	1	21361	19586.5	21518.9	3.41629	1.86135e-05				SAFB2	Q14151
Q13247_S301	SRSF6	sp|Q13247|SRSF6_HUMAN	Q13247	sNSPLPVPPSK	0.9521	0	0	0	0	2.03682e-05				CDV3	Q9UKY7
Q9UK61_S673	TASOR	sp|Q9UK61|TASOR_HUMAN	Q9UK61	SSHsLDYDKDR	0.9623	12637.9	13750.1	12619.5	4.24396	2.26834e-05				LMBRD1	Q9NUN5
P18887_S199	XRCC1	sp|P18887|XRCC1_HUMAN	P18887	INKTsPVTASDPAGPSYAAATLQASSAASSASPVSR	0.7766	0	0	0	0	2.27115e-05				RBM14	Q96PK6
P27708_S1407	CAD	sp|P27708|PYR1_HUMAN	P27708	RLSsFVTK	0.9575	0	0	0	0	3.31133e-05				PDCD6IP	Q8WUM4
Q9Y4A5_S2077	TRRAP	sp|Q9Y4A5|TRRAP_HUMAN	Q9Y4A5	SQsLPGADSLLAK;SQsLPGADSLLAKPIDK	0.9734	17686.9	18777.1	17588.2	2.23679	3.71491e-05				SNRNP70	P08621
Q9H9B1_S395	EHMT1	sp|Q9H9B1|EHMT1_HUMAN	Q9H9B1	MDGEsEEEQESVDtGEEEEGGDESDLSSESSIK	0.967	0	0	0	0	3.83979e-05				CHM	P24386
Q9H9B1_T404	EHMT1	sp|Q9H9B1|EHMT1_HUMAN	Q9H9B1	MDGEsEEEQESVDtGEEEEGGDESDLSSESSIK	0.967	0	0	0	0	3.83979e-05				PHKB	Q93100
Q9Y580_S204	RBM7	sp|Q9Y580|RBM7_HUMAN	Q9Y580	MNsYPYLADR	0.9687	9146.83	9862.48	9942.57	3.65174	3.9011e-05				CCAR2	Q8N163
P17544_T326	ATF7	sp|P17544|ATF7_HUMAN	P17544	RRtVDEDPDER	1	8234.55	8120.4	7962.97	11.1056	4.83463e-05				RACGAP1	Q9H0H5
Q9H307_S66	PNN	sp|Q9H307|PININ_HUMAN	Q9H307	GFsDSGGGPPAK;RGFsDSGGGPPAK	0.976	69099.5	70388.7	74984.6	2.66817	6.11195e-05				KCNAB2	Q13303
O15417_S1136	TNRC18	sp|O15417|TNC18_HUMAN	O15417	LALsPEDKPIRLsPSK	0.9673	0	0	0	0	7.92973e-05				CAVIN2	O95810
Q9HDC5_S478	JPH1	sp|Q9HDC5|JPH1_HUMAN	Q9HDC5	HSHsPAsSPKPLK	0.9078	0	0	0	0	9.68882e-05				NDRG2	Q9UN36
O43399_T163	TPD52L2	sp|O43399|TPD54_HUMAN	O43399	NsAtFKSFEDR	0.775	0	0	0	0	0.000126247				PDAP1	Q13442
Q15345_S326	LRRC41	sp|Q15345|LRC41_HUMAN	Q15345	sTQESLTAGGTDLK	0.8656	8708.48	10192.2	7937.9	#DIV/0!	0.000173016				SSRP1	Q08945
O14639_S655	ABLIM1	sp|O14639|ABLM1_HUMAN	O14639	TAsLPGYGR	0.9133	7168.02	9280.64	8366.23	#DIV/0!	0.000173081				COIL	P38432
Q14738_S90	PPP2R5D	sp|Q14738|2A5D_HUMAN	Q14738	QSssRFNLSK	0.9013	0	0	0	0	0.000188837				CSF2RB	P32927
Q96SB3_S100	PPP1R9B	sp|Q96SB3|NEB2_HUMAN	Q96SB3	ASsLNENVDHSALLK	0.94	5521.25	6681	7269.96	#DIV/0!	0.000225876				MAP1A	P78559
Q9Y580_S136	RBM7	sp|Q9Y580|RBM7_HUMAN	Q9Y580	SFsSPENFQR	0.9737	31421.4	33294.3	33860.5	2.24676	0.000238379				EP300	Q09472
Q8NFC6_S800	BOD1L1	sp|Q8NFC6|BD1L1_HUMAN	Q8NFC6	KLsVLGK	1	5170.9	6843.56	6250.61	#DIV/0!	0.00024049				NFATC3	Q12968
Q07666_S18	KHDRBS1	sp|Q07666|KHDR1_HUMAN	Q07666	sGSMDPSGAHPSVR	0.9214	9555.34	9792.26	9434.11	2.49532	0.00026213				VAPA	Q9P0L0
Q13112_S428	CHAF1B	sp|Q13112|CAF1B_HUMAN	Q13112	TQDPsSPGTtPPQAR	0.9237	0	0	0	0	0.000268397				GATAD2B	Q8WXI9
O75821_S42	EIF3G	sp|O75821|EIF3G_HUMAN	O75821	GIPLATGDTsPEPELLPGAPLPPPK	0.9366	0	0	0	0	0.000343126				ARL6IP6	Q8N6S5
P52732_T926	KIF11	sp|P52732|KIF11_HUMAN	P52732	LDIPTGTtPQR	0.9531	0	0	0	0	0.000352083				BIN2	Q9UBW5
Q9ULX3_S201	NOB1	sp|Q9ULX3|NOB1_HUMAN	Q9ULX3	KDDsDDDGGGWITPSNIK	0.9764	31796.3	30609.7	18289.7	0.30794	0.000385485				PIKFYVE	Q9Y2I7
Q53SF7_T260	COBLL1	sp|Q53SF7|COBL1_HUMAN	Q53SF7	DQTAsAPAtPLVNK	0.975	7023.05	8570.12	7845	0.59023	0.000400833				CLGN	O14967
Q9NTI5_T1188	PDS5B	sp|Q9NTI5|PDS5B_HUMAN	Q9NTI5	GRLDsSEMDHSENEDYtMSSPLPGK	0.8788	0	0	939.908	0.0175357	0.000438682				RPS6	P62753
O95071_S2486	UBR5	sp|O95071|UBR5_HUMAN	O95071	sVVDMDLDDTDDGDDNAPLFYQPGK	0.9685	0	0	0	0	0.000442083				DBNL	Q9UJU6
Q14151_S513	SAFB2	sp|Q14151|SAFB2_HUMAN	Q14151	HHsVEIK	1	15308.1	13111.1	16153.2	3.08864	0.000449074				PAPOLG	Q9BWT3
O76021_S361	RSL1D1	sp|O76021|RL1D1_HUMAN	O76021	ATNEsEDEIPQLVPIGK	0.9687	19518	16344.2	31369.6	0.115626	0.000528264				TPR	P12270
P18615_S51	NELFE	sp|P18615|NELFE_HUMAN	P18615	SLsEQPVMDTATATEQAK	0.9695	24492.1	26315.8	26453.6	2.35263	0.000528823				RBM6	P78332
Q9Y4A5_S2051	TRRAP	sp|Q9Y4A5|TRRAP_HUMAN	Q9Y4A5	GLsVDSAQEVK;RGLsVDSAQEVK	0.9765	21293.9	18510.9	19473.7	2.43336	0.000563079				ZNF330	Q9Y3S2
Q08495_S289	DMTN	sp|Q08495|DEMA_HUMAN	Q08495	SSsLPAYGR	0.9601	13165.3	12698.4	11455.7	7.03601	0.000574583				NRBP1	Q9UHY1
Q9UKY7_S107	CDV3	sp|Q9UKY7|CDV3_HUMAN	Q9UKY7	VQAMQISsEKEEDDNEKR	0.9579	0	0	0	0	0.000585531				RPS6KB1	P23443
Q9NXV6_S131	CDKN2AIP	sp|Q9NXV6|CARF_HUMAN	Q9NXV6	GIsSSNEGVEEPSK	0.9747	14933.2	13006.7	14669.2	2.6774	0.000595323				RPS6KA4	O75676
Q9NUN5_S528	LMBRD1	sp|Q9NUN5|LMBD1_HUMAN	Q9NUN5	SVIEGVDEDsDISDDEPSVYSA	0.9725	4431.6	6344.89	5445.14	#DIV/0!	0.000611496				NR3C1	P04150
Q15022_S541	SUZ12	sp|Q15022|SUZ12_HUMAN	Q15022	ASMsEFLEsEDGEVEQQR	0.9312	0	0	0	0	0.00068747				DDX42	Q86XP3
P21333_S2143	FLNA	sp|P21333|FLNA_HUMAN	P21333	VKEsITR	0.9726	16769.7	15648	18693.9	3.5086	0.000695329				MSH6	P52701
O75122_S360	CLASP2	sp|O75122|CLAP2_HUMAN	O75122	ASsLPGsLQR	0.8203	4495.15	5699.6	4813.49	0.276806	0.000744617				ZZEF1	O43149
O75122_S364	CLASP2	sp|O75122|CLAP2_HUMAN	O75122	ASsLPGsLQR	0.8239	4495.15	5699.6	4813.49	0.276806	0.000744617				HDAC7	Q8WUI4
Q9Y6G9_S516	DYNC1LI1	sp|Q9Y6G9|DC1L1_HUMAN	Q9Y6G9	KPVTVSPTTPTsPTEGEAS;KPVTVSPTtPTsPTEGEAS;KPVTVSPtTPTsPTEGEAS;KPVTVsPTTPTsPTEGEAS	0.9733	115678	115682	97497.4	2.11662	0.000752227				LSM14A	Q8ND56
Q5VZL5_S1181	ZMYM4	sp|Q5VZL5|ZMYM4_HUMAN	Q5VZL5	KKsIVAVEPR	1	6465.2	6130.65	6076.69	1.5783	0.000768864				ARHGAP9	Q9BRR9
Q96PK6_S618	RBM14	sp|Q96PK6|RBM14_HUMAN	Q96PK6	LsESQLSFR;RLsESQLSFR	0.9704	12640.3	12533.8	12574.8	1.17483	0.000778297				KAT6A	Q92794
Q8WUM4_S642	PDCD6IP	sp|Q8WUM4|PDC6I_HUMAN	Q8WUM4	MKQsNNEANLR	1	11732.7	10674.2	12864.5	2.14761	0.000788294				EIF5B	O60841
Q03164_S2198	KMT2A	sp|Q03164|KMT2A_HUMAN	Q03164	RHSTsSLsPQR	0.8932	0	0	0	0	0.000789678				SETD1A	O15047
P29590_S505	PML	sp|P29590|PML_HUMAN	P29590	SsPEQPRPSTSK;SsPEQPRPsTSK	0.9548	55488.2	54848.3	54450.7	1.68031	0.000790277				DIS3L2	Q8IYB7
Q13263_S473	TRIM28	sp|Q13263|TIF1B_HUMAN	Q13263	SRsGEGEVSGLMR;sGEGEVSGLMR	0.9769	128798	115586	113595	2.10658	0.000804692				OSTF1	Q92882
P08621_S320	SNRNP70	sp|P08621|RU17_HUMAN	P08621	GGGGDMAEPsEAGDAPPDDGPPGELGPDGPDGPEEK	1	18411.1	19263.5	21259.8	0.657497	0.000838294				SRCAP	Q6ZRS2
P42331_S533	ARHGAP25	sp|P42331|RHG25_HUMAN	P42331	GDTLAsPNSETGPGK	0.9748	12537.9	11775.9	13688.1	2.10251	0.000873642				HNRNPA3	P51991
Q9UQ35_S992	SRRM2	sp|Q9UQ35|SRRM2_HUMAN	Q9UQ35	QSHSGsIsPYPK	0.9294	3618.04	0	0	0.0438254	0.000877017				RTN4	Q9NQC3
Q9Y6G9_T513	DYNC1LI1	sp|Q9Y6G9|DC1L1_HUMAN	Q9Y6G9	KPVTVSPTtPTSPTEGEAS;KPVTVSPTtPTsPTEGEAS;KPVTVSPttPTSPTEGEAS	0.9704	70069.1	67205.6	54432.1	3.19665	0.000926186				SH3KBP1	Q96B97
Q9H3P2_T277	NELFA	sp|Q9H3P2|NELFA_HUMAN	Q9H3P2	tLDAEVVEKPAK	1	4460.74	6655.4	5373.88	#DIV/0!	0.000988819				CXXC1	Q9P0U4
Q6JBY9_S284	RCSD1	sp|Q6JBY9|CPZIP_HUMAN	Q6JBY9	RSSEEVDGQHPAQEEVPEsPQTSGPEAENR;RSsEEVDGQHPAQEEVPEsPQTSGPEAENR;SSEEVDGQHPAQEEVPEsPQTSGPEAENR	0.9734	85644.8	78506.4	74591.4	1.79951	0.000995665				SHMT1	P34896
P35236_S44	PTPN7	sp|P35236|PTN7_HUMAN	P35236	RGsNVALMLDVR	1	24122.8	25620.6	25846.2	0.789575	0.00101127				KIF5B	P33176
P24386_S651	CHM	sp|P24386|RAE1_HUMAN	P24386	ESTNLGNLEEsSE	0.9652	19920	26619	18306	#DIV/0!	0.00105386				RANBP1	P43487
P01893_S350	HLA-H	sp|P01893|HLAH_HUMAN	P01893	GGSYSQAASsNSAQGSDVSLTA	0.9616	5375.21	7587.74	5457.68	#DIV/0!	0.0010605				ARAP1	Q96P48
O00231_S14	PSMD11	sp|O00231|PSD11_HUMAN	O00231	AQsLLSTDR	0.9761	9751.69	10667.7	10630.7	2.00212	0.0010639				TUT7	Q5VYS8
P29590_S512	PML	sp|P29590|PML_HUMAN	P29590	SsPEQPRPsTSK	0.7748	21844.2	25172.8	24641.3	1.98697	0.00107985				GTPBP1	O00178
Q93100_S27	PHKB	sp|Q93100|KPBB_HUMAN	Q93100	SGsVYEPLK	0.9562	0	0	0	0	0.00113482				G3BP1	Q13283
Q9Y6G9_S510	DYNC1LI1	sp|Q9Y6G9|DC1L1_HUMAN	Q9Y6G9	KPVTVsPTTPTSPTEGEAS;KPVTVsPTTPTsPTEGEAS	0.9646	52526.9	57866	46773.7	2.05815	0.0011415				DENND4A	Q7Z401
Q8NFC6_S902	BOD1L1	sp|Q8NFC6|BD1L1_HUMAN	Q8NFC6	TKsLLEEK	0.972	8957.01	9246.43	10494.1	5.79998	0.00116109				MAPRE2	Q15555
Q8N163_S686	CCAR2	sp|Q8N163|CCAR2_HUMAN	Q8N163	SVAsNQSEMEFsSLQDMPK	0.9013	0	0	0	0	0.00117626				PWP1	Q13610
Q9H0H5_S203	RACGAP1	sp|Q9H0H5|RGAP1_HUMAN	Q9H0H5	sIGSAVDQGNESIVAK	0.9727	4853.31	5770.89	5923.01	6.71497	0.00121973				CHD1	O14646
Q13303_S112	KCNAB2	sp|Q13303|KCAB2_HUMAN	Q13303	RSsLVITTK	0.8735	0	0	0	0	0.00124542				ATP2A2	P16615
O95810_S288	CAVIN2	sp|O95810|CAVN2_HUMAN	O95810	SsPFKVsPLTFGR	0.8962	5615.49	7314.31	4827.51	#DIV/0!	0.00128261				FGD3	Q5JSP0
Q9UN36_S338	NDRG2	sp|Q9UN36|NDRG2_HUMAN	Q9UN36	TAsLTSAAsVDGNR	0.9531	5789.19	6453.66	4148.32	#DIV/0!	0.0013397				SPTBN1	Q01082
Q13442_S57	PDAP1	sp|Q13442|HAP28_HUMAN	Q13442	sLDSDEsEDEEDDYQQK	0.8955	251600	366542	267312	27.8757	0.00139841				CCNL1	Q9UK58
Q08945_S657	SSRP1	sp|Q08945|SSRP1_HUMAN	Q08945	QLsESFK	0.9023	23591.7	19924.7	30645.3	#DIV/0!	0.00141697				WDR33	Q9C0J8
P04792_S15	HSPB1	sp|P04792|HSPB1_HUMAN	P04792	GPsWDPFR	1	11527.3	13421.1	16679.9	11.9021	0.00142828				NFIC	P08651
P38432_T570	COIL	sp|P38432|COIL_HUMAN	P38432	LIIESPSNtSSTEPA;LIIEsPSNtSSTEPA	0.928	25849.5	17553.3	27301.4	#DIV/0!	0.001485				SYNRG	Q9UMZ2
Q13769_T328	THOC5	sp|Q13769|THOC5_HUMAN	Q13769	RPtLGVQLDDK;RPtLGVQLDDKR;RRPtLGVQLDDK	1	20218.8	19874.2	23812.3	2.62007	0.00153681				MTMR12	Q9C0I1
Q9H6F5_S18	CCDC86	sp|Q9H6F5|CCD86_HUMAN	Q9H6F5	LGGLRPEsPESLTSVSR	0.975	17126.3	11416.7	8582.9	0.374153	0.00158433				YTHDC1	Q96MU7
Q9BUR4_S85	WRAP53	sp|Q9BUR4|TCAB1_HUMAN	Q9BUR4	EGDPVSLSTPLETEFGsPSELsPR	0.8656	0	0	0	0	0.00161939				MACROH2A1	O75367
Q9BUR4_S90	WRAP53	sp|Q9BUR4|TCAB1_HUMAN	Q9BUR4	EGDPVSLSTPLETEFGsPSELsPR	0.8484	0	0	0	0	0.00161939				SMAP	O00193
Q86YV0_S790	RASAL3	sp|Q86YV0|RASL3_HUMAN	Q86YV0	SQsLRsVR;sQSLRsVR	0.956	42357.1	42641.6	44145.5	0.609212	0.00172943				LEMD3	Q9Y2U8
O15400_S129	STX7	sp|O15400|STX7_HUMAN	O15400	ASSRVsGSFPEDSSK;ASsRVsGSFPEDSSK;VsGSFPEDSSK	0.9722	55202.4	56257.5	59089.5	1.859	0.00173042				SMC4	Q9NTJ3
Q9C0C2_S836	TNKS1BP1	sp|Q9C0C2|TB182_HUMAN	Q9C0C2	sQEADVQDWEFR	1	8231.51	9612.09	9023.66	1.71826	0.00174555				SDE2	Q6IQ49
P46940_S1443	IQGAP1	sp|P46940|IQGA1_HUMAN	P46940	SKsVKEDSNLTLQEK;sVKEDSNLTLQEK	0.9743	13182.3	13699.7	10816	2.4345	0.00204491				EVI2B	P34910
Q9UL03_S804	INTS6	sp|Q9UL03|INT6_HUMAN	Q9UL03	sHEEVNTELK	0.9734	13494.6	18317.2	14894.6	3.10355	0.0020738				PLEKHF1	Q96S99
P57737_S465	CORO7	sp|P57737|CORO7_HUMAN	P57737	SLQsLLGPSSK	0.9681	2509.91	2937.26	4015.78	#DIV/0!	0.00214566				RFFL	Q8WZ73
Q09666_S5110	AHNAK	sp|Q09666|AHNK_HUMAN	Q09666	AEAPLPsPK	1	18360.2	17765.5	20037.5	1.72009	0.00215803				TOP2B	Q02880
Q9UDY2_S168	TJP2	sp|Q9UDY2|ZO2_HUMAN	Q9UDY2	sRSWEDsPER	0.7554	30204.2	48304.2	37413.1	27.7821	0.00217939				PROSER2	Q86WR7
O15417_S2771	TNRC18	sp|O15417|TNC18_HUMAN	O15417	LPsVENRPK	1	6130.99	6877.12	6589.22	4.83279	0.00221317				ATP8A1	Q9Y2Q0
Q92900_S1107	UPF1	sp|Q92900|RENT1_HUMAN	Q92900	SQIDVALsQDSTYQGER;SQIDVALsQDsTYQGER	0.9736	15778.6	13288	14622	0.735095	0.00230697				BRD8	Q9H0E9
P11274_S459	BCR	sp|P11274|BCR_HUMAN	P11274	HQDGLPYIDDsPSSSPHLSSK;HQDGLPYIDDsPSSsPHLSSK;HQDGLPYIDDsPsSSPHLSSK	0.9701	12018	18366.7	11593.9	0.470754	0.00232022				SMG1	Q96Q15
Q9UQ35_S2692	SRRM2	sp|Q9UQ35|SRRM2_HUMAN	Q9UQ35	SLsYSPVER;SLsYsPVER	0.9724	41889.2	43768.1	39576.5	1.27316	0.00241684				ESS2	Q96DF8
Q9H4L7_S124	SMARCAD1	sp|Q9H4L7|SMRCD_HUMAN	Q9H4L7	DTVIIVsEPsEDEESQGLPTMAR	0.9333	0	0	0	0	0.00258088				ADAM22	Q9P0K1
Q9H4L7_S127	SMARCAD1	sp|Q9H4L7|SMRCD_HUMAN	Q9H4L7	DTVIIVsEPsEDEESQGLPTMAR	0.9333	0	0	0	0	0.00258088				MCMBP	Q9BTE3
P32927_S791	CSF2RB	sp|P32927|IL3RB_HUMAN	P32927	sPVLNPGER	1	2787.68	3743.28	2245.17	#DIV/0!	0.00261053				OSBP	P22059
Q09666_S216	AHNAK	sp|Q09666|AHNK_HUMAN	Q09666	LPSGSGAAsPTGSAVDIR;LPSGsGAAsPTGSAVDIR;LPsGSGAAsPTGSAVDIR	0.9709	46472.1	54535	55432.6	1.58593	0.00267139				DPPA4	Q7L190
P49585_S319	PCYT1A	sp|P49585|PCY1A_HUMAN	P49585	MLQAIsPKQsPSSSPTR;MLQAIsPKQsPSSsPTR;MLQAIsPKQsPsSSPTR	0.9645	16603	22533	20219.3	0.47254	0.00271696				DEK	P35659
Q9UI08_S329	EVL	sp|Q9UI08|EVL_HUMAN	Q9UI08	sNSVEKPVSSILSR;sNSVEKPVSSILsR	0.9446	18508.9	18708.9	16376.8	1.53946	0.00276076				DNMT1	P26358
P78559_S2018	MAP1A	sp|P78559|MAP1A_HUMAN	P78559	ELsSPIsPK	0.7891	23606.4	29216.9	17498.7	24.2328	0.0028385				RIPOR2	Q9Y4F9
Q8N9T8_S171	KRI1	sp|Q8N9T8|KRI1_HUMAN	Q8N9T8	AFVEDsEDEDGAGEGGSSLLQK	0.9764	86581.1	89470.6	77374.4	1.44133	0.00294077				GLYR1	Q49A26
Q09472_S1038	EP300	sp|Q09472|EP300_HUMAN	Q09472	TEIKEEEDQPSTSATQSsPAPGQSK	0.9685	10463.5	9352.85	9279	7.76477	0.00294445				BAG6	P46379
Q12968_S247	NFATC3	sp|Q12968|NFAC3_HUMAN	Q12968	sSVTDENWLSPR	0.9236	9227.23	10516.3	11414.3	0.663592	0.00295409				SCFD1	Q8WVM8
Q9P0L0_S214	VAPA	sp|Q9P0L0|VAPA_HUMAN	Q9P0L0	VAHSDKPGsTSTASFR	0.9483	4546.18	4773	4947.14	1.73554	0.00299527				RBM34	P42696
P46087_S181	NOP2	sp|P46087|NOP2_HUMAN	P46087	EAAAGIQWsEEEtEDEEEEKEVTPESGPPK;EAAAGIQWsEEEtEDEEEEKEVtPESGPPK	0.9718	94652.1	128037	73099.4	0.458084	0.00302767				DKC1	O60832
P46087_T185	NOP2	sp|P46087|NOP2_HUMAN	P46087	EAAAGIQWSEEEtEDEEEEKEVtPESGPPK;EAAAGIQWsEEEtEDEEEEKEVTPESGPPK;EAAAGIQWsEEEtEDEEEEKEVtPESGPPK	0.9718	94652.1	128037	73099.4	0.458084	0.00302767				OSBPL11	Q9BXB4
P11388_S1374	TOP2A	sp|P11388|TOP2A_HUMAN	P11388	sVVSDLEADDVK	0.9766	19420.2	23049.4	20995.1	1.62875	0.00307623				LAT	O43561
Q9Y2W2_S600	WBP11	sp|Q9Y2W2|WBP11_HUMAN	Q9Y2W2	sEDDSAVPLAK	0.971	4703.87	5946.74	5248.76	1.84725	0.00308326				MPHOSPH10	O00566
O75152_S290	ZC3H11A	sp|O75152|ZC11A_HUMAN	O75152	KFsAGGDSDPPLK;KFsAGGDSDPPLKR	0.9732	13810.1	16253.7	13661.3	4.66335	0.00308817				RABGAP1L	Q5R372
P78347_S103	GTF2I	sp|P78347|GTF2I_HUMAN	P78347	MsVDAVEIETLR	0.9759	6330.12	7510.8	6124.13	2.40026	0.00308978				TAF6	P49848
P63104_T232	YWHAZ	sp|P63104|1433Z_HUMAN	P63104	DNLTLWTSDtQGDEAEAGEGGEN	0.9661	1001.66	0	0	0.0489912	0.00309822				PTDSS2	Q9BVG9
Q8WXI9_S135	GATAD2B	sp|Q8WXI9|P66B_HUMAN	Q8WXI9	GRLtPSPDIIVLSDNEASsPR;LTPSPDIIVLsDNEASsPR	0.9603	6518.44	11424.8	7542.5	0.38777	0.00313344				MEIS1	O00470
Q96QH2_S204	PRAM1	sp|Q96QH2|PRAM_HUMAN	Q96QH2	sPQPELSTFPK	0.9743	11306.5	12374.4	15735.3	2.96628	0.00313446				BAZ2A	Q9UIF9
Q92619_S577	ARHGAP45	sp|Q92619|HMHA1_HUMAN	Q92619	KsSFNVSDVAR	0.7747	0	0	0	0	0.00315219				ESYT2	A0FGR8
P46087_T195	NOP2	sp|P46087|NOP2_HUMAN	P46087	EAAAGIQWSEEEtEDEEEEKEVtPESGPPK;EAAAGIQWsEEEtEDEEEEKEVtPESGPPK	0.9666	11636.8	14877.9	6181.77	0.324553	0.00347335				NCOA2	Q15596
Q7Z4S6_S1662	KIF21A	sp|Q7Z4S6|KI21A_HUMAN	Q7Z4S6	NLQDGQIsDTGDLGEDIASN	0.9614	5536.92	8432.72	5151.72	#DIV/0!	0.00353422				TBC1D5	Q92609
O95453_S557	PARN	sp|O95453|PARN_HUMAN	O95453	NNsFTAPSTVGK	0.9759	50025.9	57020.7	66265.2	2.23443	0.00370149				FRA10AC1	Q70Z53
Q05D32_S28	CTDSPL2	sp|Q05D32|CTSL2_HUMAN	Q05D32	KYsEVDDSLPSGGEK;KYsEVDDSLPSGGEKPSK	0.9667	28564.2	35009.5	28276.9	1.89677	0.00384306				BRF1	Q92994
Q86UE4_S298	MTDH	sp|Q86UE4|LYRIC_HUMAN	Q86UE4	LSSQIsAGEEK	0.9756	92655.8	86925.3	122908	3.10437	0.00385701				ZEB2	O60315
Q9NRA8_S78	EIF4ENIF1	sp|Q9NRA8|4ET_HUMAN	Q9NRA8	SsPVESLK;SsPVESLKK;WHASLYPASGRSsPVESLK	0.9301	8319.16	8429.7	5303.01	0.425538	0.0039885				PRKRA	O75569
P18615_S353	NELFE	sp|P18615|NELFE_HUMAN	P18615	SVWGSLAVQNsPK	0.9741	3426.61	4064.13	5780.97	0.504449	0.00405131				SNAPC5	O75971
P11274_S122	BCR	sp|P11274|BCR_HUMAN	P11274	PQPAPADGADPPPAEEPEARPDGEGsPGK	1	3977.88	0	0	0.0961277	0.00405796				MPRIP	Q6WCQ1
Q8N6S5_T19	ARL6IP6	sp|Q8N6S5|AR6P6_HUMAN	Q8N6S5	GPGtPGPVAR	1	7779.74	8416.63	8105.28	1.51051	0.00410891				KIDINS220	Q9ULH0
Q9UI08_S341	EVL	sp|Q9UI08|EVL_HUMAN	Q9UI08	sNSVEKPVSSILsR	0.8587	5574.42	6336.58	3432.99	#DIV/0!	0.00416819				OXSR1	O95747
O95239_S801	KIF4A	sp|O95239|KIF4A_HUMAN	O95239	TFsLTEVR	0.9732	7708.57	7796.88	8756.75	2.05769	0.00416986				USP39	Q53GS9
Q9UGN4_S260	CD300A	sp|Q9UGN4|CLM8_HUMAN	Q9UGN4	EVEVEYSTVAsPR	0.9633	6782.49	6516.87	7282.85	4.18063	0.00425166				SAFB	Q15424
Q96AT1_T32	KIAA1143	sp|Q96AT1|K1143_HUMAN	Q96AT1	VGyREGPtVEtK	1	6605.56	11708.8	8167.93	#DIV/0!	0.00426608				NAP1L4	Q99733
Q96AT1_T35	KIAA1143	sp|Q96AT1|K1143_HUMAN	Q96AT1	VGyREGPtVEtK	1	6605.56	11708.8	8167.93	#DIV/0!	0.00426608				EHBP1L1	Q8N3D4
Q96AT1_Y27	KIAA1143	sp|Q96AT1|K1143_HUMAN	Q96AT1	VGyREGPtVEtK	1	6605.56	11708.8	8167.93	#DIV/0!	0.00426608				HNRNPUL2	Q1KMD3
Q9UBW5_S280	BIN2	sp|Q9UBW5|BIN2_HUMAN	Q9UBW5	TATVSSPLTSPTsPSTLSLK;TATVSsPLTSPTsPSTLSLK	0.9563	14481	17052.7	19258	1.96525	0.00445259				WRNIP1	Q96S55
P61073_S351	CXCR4	sp|P61073|CXCR4_HUMAN	P61073	GGHSSVSTESESSSFHsS	0.9567	0	0	5572.41	0.134958	0.00446276				MAP4	P27816
Q08945_S659	SSRP1	sp|Q08945|SSRP1_HUMAN	Q08945	QLSEsFK	0.9674	0	0	0	0	0.0046304				VAMP4	O75379
P11171_S95	EPB41	sp|P11171|EPB41_HUMAN	P11171	SQVsEEEGKEVESDKEK	0.9679	8604.82	9643.76	8898.19	1.42535	0.0046511				IRF2BP2	Q7Z5L9
Q8IWB9_S266	TEX2	sp|Q8IWB9|TEX2_HUMAN	Q8IWB9	TAPSsPLTsPSDTR	0.9467	12870.6	19831.9	12593.2	10.1551	0.00465658				PI4KB	Q9UBF8
Q9Y2I7_S307	PIKFYVE	sp|Q9Y2I7|FYV1_HUMAN	Q9Y2I7	SAsITNLSLDR	0.9726	19931.5	21523.4	19399.8	0.812132	0.00467597				LATS1	O95835
Q9UPU5_S1299	USP24	sp|Q9UPU5|UBP24_HUMAN	Q9UPU5	QLsVSDR	0.9697	5605.68	5499.1	5405.7	1.31486	0.00470193				PRKAR2B	P31323
P16150_S291	SPN	sp|P16150|LEUK_HUMAN	P16150	TGALVLsR	0.9756	11589.4	10569.6	7612.28	6.39488	0.00478332				MLLT1	Q03111
Q7Z2W4_S257	ZC3HAV1	sp|Q7Z2W4|ZCCHV_HUMAN	Q7Z2W4	FFQGsQEFLASASASAER	0.9757	2077.24	2773.64	2117.08	0.259419	0.00487161				RFX7	Q2KHR2
O14967_S89	CLGN	sp|O14967|CLGN_HUMAN	O14967	DDMDEEIsIyDGR	1	11010.8	20996.8	16738.7	#DIV/0!	0.00493974				GNL3	Q9BVP2
O14967_Y91	CLGN	sp|O14967|CLGN_HUMAN	O14967	DDMDEEIsIyDGR	1	11010.8	20996.8	16738.7	#DIV/0!	0.00493974				MAP1S	Q66K74
P62753_S240	RPS6	sp|P62753|RS6_HUMAN	P62753	LSsLRAsTSK;LSsLRAsTSKSESSQK;LSsLRAsTSKsESSQK;LSsLRAsTsKSESSQK;LSsLRAstSKSESSQK;LsSLRAsTSK;LsSLRAsTSKsESSQK;RLSsLRAsTSK;RLsSLRAsTSK;RLssLRAsTSK	0.9738	2290050	2.39247e+06	2164852	1.46112	0.00501342				NADK	O95544
P18615_S251	NELFE	sp|P18615|NELFE_HUMAN	P18615	SDsFPER	0.9684	15700	22803.5	16291.2	3.89102	0.00524737				TLE1	Q04724
Q9H6F5_S102	CCDC86	sp|Q9H6F5|CCD86_HUMAN	Q9H6F5	QQDLHLEsPQR;QQDLHLEsPQRQPEYSPEsPR;QQDLHLEsPQRQPEYsPESPR	1	19780.8	20991.8	19683.8	0.64269	0.00530884				HMGN1	P05114
Q9UKJ3_S1107	GPATCH8	sp|Q9UKJ3|GPTC8_HUMAN	Q9UKJ3	KPsVSEEVQATPNK	0.9721	42987.3	41959.3	45788.3	1.27187	0.00537516				STRN	O43815
Q9UKX7_S221	NUP50	sp|Q9UKX7|NUP50_HUMAN	Q9UKX7	VAAETQsPSLFGSTK	0.9732	7952.95	8298.12	9547.62	2.20495	0.00548771				TMPO	P42167
Q9UJU6_S269	DBNL	sp|Q9UJU6|DBNL_HUMAN	Q9UJU6	AMsTTSISSPQPGK;AMsTTSISsPQPGK	0.9503	18856	20366.9	21532.5	1.43529	0.00555458				BZW1	Q7L1Q6
Q9BWT3_S648	PAPOLG	sp|Q9BWT3|PAPOG_HUMAN	Q9BWT3	SHsPSIDGTPK	0.9715	10941.2	12464.6	12111.9	1.53596	0.00557371				VPS35L	Q7Z3J2
P12270_S2155	TPR	sp|P12270|TPR_HUMAN	P12270	TDGFAEAIHsPQVAGVPR	0.9749	19326.3	27961.7	25222.3	2.57526	0.00567019				DCP1B	Q8IZD4
P78332_T468	RBM6	sp|P78332|RBM6_HUMAN	P78332	LSGVPEDAtK	0.9731	0	4167.03	0	0.0853417	0.00567912				CBX3	Q13185
Q9Y4B6_S979	DCAF1	sp|Q9Y4B6|DCAF1_HUMAN	Q9Y4B6	QKsDHGAYSQSPAIK	0.9681	6133.88	6890.85	8040.05	4.57136	0.00583316				CCZ1B	P86790
O75081_S459	CBFA2T3	sp|O75081|MTG16_HUMAN	O75081	SSsAGPEGPQLDVPR	0.9675	31375.9	36255.9	33370.1	1.37764	0.00586612				RPS6KA3	P51812
Q5XUX1_S18	FBXW9	sp|Q5XUX1|FBXW9_HUMAN	Q5XUX1	TWDDDsDPESETDPDAQAK	0.9718	6594.45	7291.44	8758.1	0.625916	0.00590227				POGZ	Q7Z3K3
Q9Y3S2_S291	ZNF330	sp|Q9Y3S2|ZN330_HUMAN	Q9Y3S2	KDsDTESSDLFTNLNLGR	0.951	0	1986.69	1545.69	0.205966	0.00598234				MAP3K4	Q9Y6R4
P78347_S412	GTF2I	sp|P78347|GTF2I_HUMAN	P78347	RPsTYGIPR	0.9677	14433.5	13588.8	13596.6	1.50855	0.00606046				TONSL	Q96HA7
Q14839_S308	CHD4	sp|Q14839|CHD4_HUMAN	Q14839	sSSEDDDLDVEsDFDDASINSYSVSDGSTSR	0.8281	2788.43	4654.85	4130.58	0.46597	0.00606092				NUP188	Q5SRE5
Q14839_S319	CHD4	sp|Q14839|CHD4_HUMAN	Q14839	sSSEDDDLDVEsDFDDASINSYSVSDGSTSR	0.8982	2788.43	4654.85	4130.58	0.46597	0.00606092				FHOD1	Q9Y613
P42575_S157	CASP2	sp|P42575|CASP2_HUMAN	P42575	LRLsTDTVEHSLDNK	0.9628	10076.6	8948.42	6761.97	4.07837	0.00608119				FOSL2	P15408
Q96RK0_S1186	CIC	sp|Q96RK0|CIC_HUMAN	Q96RK0	sSSEAKPTSLGLAGGHK	0.9393	11569.4	11413.5	9022.45	2.09661	0.00610412				ARID3A	Q99856
P11171_S92	EPB41	sp|P11171|EPB41_HUMAN	P11171	sQVSEEEGKEVESDKEK	0.9761	12432.5	15333.2	11187.8	2.17225	0.00618099				SLC12A6	Q9UHW9
Q9UHY1_S14	NRBP1	sp|Q9UHY1|NRBP_HUMAN	Q9UHY1	sEGESQTVLSSGsDPK	0.948	6043.63	10721.8	6577.68	#DIV/0!	0.00624186				EIF4G1	Q04637
Q8N292_S74	GAPT	sp|Q8N292|GAPT_HUMAN	Q8N292	HEIsVETQDHK	0.9747	6907.77	9798.44	8849.15	2.15582	0.00624379				MTA2	O94776
P23443_S447	RPS6KB1	sp|P23443|KS6B1_HUMAN	P23443	TPVsPVK	0.9728	7669.95	8211.28	8401.58	1.63909	0.00625133				PNISR	Q8TF01
O75676_S343	RPS6KA4	sp|O75676|KS6A4_HUMAN	O75676	LEPVYsPPGsPPPGDPR	0.9719	25563.8	39816.4	25618.4	5.73294	0.00625451				AATF	Q9NY61
O75676_S347	RPS6KA4	sp|O75676|KS6A4_HUMAN	O75676	LEPVYsPPGsPPPGDPR	0.9719	25563.8	39816.4	25618.4	5.73294	0.00625451				UVRAG	Q9P2Y5
Q765P7_S456	MTSS2	sp|Q765P7|MTSS2_HUMAN	Q765P7	GLsLEHQK	1	5290.93	6608.89	6788.39	2.72491	0.00626624				DHX9	Q08211
P55081_S116	MFAP1	sp|P55081|MFAP1_HUMAN	P55081	IVEPEVVGEsDSEVEGDAWR;IVEPEVVGEsDsEVEGDAWR	1	9669.3	13371.5	12277.8	0.572462	0.0064531				BCAS3	Q9H6U6
P04150_S134	NR3C1	sp|P04150|GCR_HUMAN	P04150	STsVPENPK	0.9566	10069.3	12578.9	13926.8	2.85694	0.00646188				IKZF2	Q9UKS7
Q13459_S1331	MYO9B	sp|Q13459|MYO9B_HUMAN	Q13459	LVAAASPSAMLSQsLDLSDR	0.9579	4032.94	4246.82	8103.09	0.409438	0.00651615				NTHL1	P78549
Q16637_S28	SMN1	sp|Q16637|SMN_HUMAN	Q16637	GTGQsDDSDIWDDTALIK;GTGQsDDsDIWDDTALIK	0.9709	15709.3	25135.1	21637.5	0.508992	0.00652306				MLF2	Q15773
Q86XP3_Y183	DDX42	sp|Q86XP3|DDX42_HUMAN	Q86XP3	YMAENPTAGVVQEEEEDNLEyDSDGNPIAPTK;YMAENPTAGVVQEEEEDNLEyDSDGNPIAPTKK	0.9564	20144.3	27835.9	17997.5	0.435469	0.00668593				ATP11C	Q8NB49
Q96JM3_S308	CHAMP1	sp|Q96JM3|CHAP1_HUMAN	Q96JM3	RPAPAVsPGSWK;RPAPAVsPGSWKPGPPGsPR	0.9723	15911.6	21729.5	20643.2	0.668689	0.00671679				TBC1D10B	Q4KMP7
Q12888_S1317	TP53BP1	sp|Q12888|TP53B_HUMAN	Q12888	TSsGTsLSAMHSSGSSGK	0.9276	6590.56	11154.7	12899.4	28.7848	0.00673779				GATA2	P23769
Q9BVJ6_S437	UTP14A	sp|Q9BVJ6|UT14A_HUMAN	Q9BVJ6	SELsQDAEPAGSQETK	0.9737	8172.12	10524.7	9816.87	2.10095	0.00677528				HCFC1	P51610
Q12888_S523	TP53BP1	sp|Q12888|TP53B_HUMAN	Q12888	LMLSTSEYsQsPK	0.968	4305.92	8393.19	8649.27	0.449581	0.00698901				PUM1	Q14671
Q9UI08_S331	EVL	sp|Q9UI08|EVL_HUMAN	Q9UI08	SNsVEKPVSSILSR	0.971	34366.9	26805.5	34551.3	1.7142	0.00699747				MELK	Q14680
P52701_S137	MSH6	sp|P52701|MSH6_HUMAN	P52701	VHVQFFDDsPTR	0.97	9939.52	10232.6	9895.37	0.93295	0.0070399				STK39	Q9UEW8
O75592_S2871	MYCBP2	sp|O75592|MYCB2_HUMAN	O75592	SKsDSYTLDPDTLR	0.9722	24268.4	25187	24881.8	0.925668	0.00709777				DDX24	Q9GZR7
Q16637_S31	SMN1	sp|Q16637|SMN_HUMAN	Q16637	GTGQsDDsDIWDDTALIK	0.971	10893	17445.9	16885.6	0.33277	0.00713181				MDN1	Q9NU22
Q96KR1_S1054	ZFR	sp|Q96KR1|ZFR_HUMAN	Q96KR1	DsDGVDGFEAEGK;RDsDGVDGFEAEGK;RDsDGVDGFEAEGKK;RRDsDGVDGFEAEGK	1	78858.1	78790.5	78943	1.21384	0.00722227				NOC2L	Q9Y3T9
P25098_S670	GRK2	sp|P25098|ARBK1_HUMAN	P25098	NKPRsPVVELSK;sPVVELSK	0.9767	67604.7	59653.7	68210.6	1.44038	0.00722498				RFX1	P22670
O00161_S20	SNAP23	sp|O00161|SNP23_HUMAN	O00161	AHQITDEsLESTR	0.9716	8250.79	8866.46	9752.01	1.44929	0.00739124				TRA2A	Q13595
Q09666_S210	AHNAK	sp|Q09666|AHNK_HUMAN	Q09666	LPsGSGAASPTGSAVDIR;LPsGSGAAsPTGSAVDIR;LPsGsGAASPTGSAVDIR	0.9705	53624.1	79401	66925.3	2.61481	0.0074362				MAST4	O15021
O95155_S101	UBE4B	sp|O95155|UBE4B_HUMAN	O95155	SQSSEGVSSLSSSPSNSLETQSQSLsR;SQSSEGVSSLSSsPSNSLETQSQSLsR	0.9647	17241.9	19288.3	11218.1	10.2851	0.00749571				IWS1	Q96ST2
Q92766_S1219	RREB1	sp|Q92766|RREB1_HUMAN	Q92766	FSPFLQTAEDNTQDEVAGAPADHHGPsDEEQGsPPEDK	0.8873	1486.97	0	1747.37	0.0986546	0.00766239				H1-4	P10412
Q92766_S1225	RREB1	sp|Q92766|RREB1_HUMAN	Q92766	FSPFLQTAEDNTQDEVAGAPADHHGPsDEEQGsPPEDK	0.8873	1486.97	0	1747.37	0.0986546	0.00766239				UBR4	Q5T4S7
O43149_S1473	ZZEF1	sp|O43149|ZZEF1_HUMAN	O43149	TSSVVEEHFQAsVsPTEAAPPATGDQSPGLGTQPK	0.9403	7463.04	11109.6	5561.15	#DIV/0!	0.00780695				NDRG1	Q92597
O43149_S1475	ZZEF1	sp|O43149|ZZEF1_HUMAN	O43149	TSSVVEEHFQAsVsPTEAAPPATGDQSPGLGTQPK	0.939	7463.04	11109.6	5561.15	#DIV/0!	0.00780695				PGRMC1	O00264
Q8WUI4_S486	HDAC7	sp|Q8WUI4|HDAC7_HUMAN	Q8WUI4	AQsSPAAPASLSAPEPASQAR	0.9649	4208.34	0	3812.37	0.239441	0.00794486				CUSTOS	Q96C57
Q9H0D6_S471	XRN2	sp|Q9H0D6|XRN2_HUMAN	Q9H0D6	MQNNSsPSIsPNTSFTSDGSPSPLGGIK	0.9621	5145.81	1713.47	0	0.224163	0.00794623				ERCC6L	Q2NKX8
Q9H0D6_S475	XRN2	sp|Q9H0D6|XRN2_HUMAN	Q9H0D6	MQNNSsPSIsPNTSFTSDGSPSPLGGIK	0.9624	5145.81	1713.47	0	0.224163	0.00794623				CREB1	P16220
Q15648_S588	MED1	sp|Q15648|MED1_HUMAN	Q15648	DRHEsVGHGEDFSK	0.959	6870.56	7881.79	6467.91	1.6918	0.00798066				NUP214	P35658
P49768_S367	PSEN1	sp|P49768|PSN1_HUMAN	P49768	AAVQELSSsILAGEDPEER	0.9715	25765.9	25172.4	25058.9	0.903776	0.00802182				HMGB2	P26583
Q9UBW5_S277	BIN2	sp|Q9UBW5|BIN2_HUMAN	Q9UBW5	TATVSSPLTsPTSPSTLSLK;TATVSsPLTsPTSPSTLSLK	0.9671	31202.2	36693.2	28062	1.64961	0.00803258				DMXL1	Q9Y485
Q8ND56_S178	LSM14A	sp|Q8ND56|LS14A_HUMAN	Q8ND56	TQLsQGR;TQLsQGRSsPQLDPLR	0.9558	35620.2	49865.1	45773.1	4.14655	0.00817642				FRY	Q5TBA9
Q14160_S1475	SCRIB	sp|Q14160|SCRIB_HUMAN	Q14160	VQsPEPPAPER	1	28073.1	25695.6	34628.5	2.18248	0.00831503				NFYA	P23511
Q9BRR9_S475	ARHGAP9	sp|Q9BRR9|RHG09_HUMAN	Q9BRR9	LSGSGPAELsAGEDEEEESELVSKPLLR	0.9728	13286.7	14194.2	11308.8	0.613644	0.00833844				AP1AR	Q63HQ0
Q92794_S941	KAT6A	sp|Q92794|KAT6A_HUMAN	Q92794	RLsEGVEPWR	1	4990.24	3763.86	4663.97	1.68989	0.00841159				NASP	P49321
O60841_S171	EIF5B	sp|O60841|IF2P_HUMAN	O60841	WDGSEEDEDNsK	0.7563	15567	32010.7	21791.5	#DIV/0!	0.00849834				ATP13A3	Q9H7F0
Q9NWQ8_S295	PAG1	sp|Q9NWQ8|PHAG1_HUMAN	Q9NWQ8	RFsSLsYK	0.9106	14779.9	16004	12170.1	1.68665	0.00856417				PCBP2	Q15366
Q9NWQ8_S298	PAG1	sp|Q9NWQ8|PHAG1_HUMAN	Q9NWQ8	RFsSLsYK	0.9089	14779.9	16004	12170.1	1.68665	0.00856417				RB1	P06400
O15047_S459	SETD1A	sp|O15047|SET1A_HUMAN	O15047	TsPRPAsPAR	0.935	0	0	0	0	0.00861417
Q8IYB7_S875	DIS3L2	sp|Q8IYB7|DI3L2_HUMAN	Q8IYB7	RPGTQGHLGPEKEEEEsDGEPEDSSTS	0.9721	86445.1	78608.6	81163.1	0.86976	0.00863273
Q92882_T200	OSTF1	sp|Q92882|OSTF1_HUMAN	Q92882	tLSNAEDYLDDEDsD	0.9403	117606	102516	109753	1.50131	0.00863328
Q6ZRS2_S2725	SRCAP	sp|Q6ZRS2|SRCAP_HUMAN	Q6ZRS2	RTsADVEIR;TsADVEIR	0.9657	9011.6	13029.2	9887.34	4.40302	0.00883427
Q02952_T608	AKAP12	sp|Q02952|AKA12_HUMAN	Q02952	EGVtPWAsFKK	1	1325.27	1667.26	0	0.126097	0.0088719
P51991_S116	HNRNPA3	sp|P51991|ROA3_HUMAN	P51991	EDsVKPGAHLTVK	0.9741	20520.7	18117	19799.5	1.35861	0.00896734
Q96JM3_S452	CHAMP1	sp|Q96JM3|CHAP1_HUMAN	Q96JM3	KPSGsPDLWKLsPDQR;KPsGSPDLWKLsPDQR	0.955	28077.5	37171	22137.5	0.440251	0.00900389
Q9NQC3_S13	RTN4	sp|Q9NQC3|RTN4_HUMAN	Q9NQC3	MEDLDQSPLVSSsDSPPRPQPAFK	0.8895	19089.7	0	0	0.138364	0.00916375
Q96B97_S230	SH3KBP1	sp|Q96B97|SH3K1_HUMAN	Q96B97	sIEVENDFLPVEK	1	3501.08	8077.14	11394.8	0.382877	0.00928663
P35251_S71	RFC1	sp|P35251|RFC1_HUMAN	P35251	IIYDSDsESEETLQVK;IIYDsDsESEETLQVK	0.964	25271.9	16983.9	11557.3	0.34538	0.00929841
Q9P0U4_S6	CXXC1	sp|Q9P0U4|CXXC1_HUMAN	Q9P0U4	MEGDGsDPEPPDAGEDSK	0.9741	2492.56	5476	4877.97	#DIV/0!	0.00931588
P34896_S381	SHMT1	sp|P34896|GLYC_HUMAN	P34896	GtDGGRAEKVLEACsIACNK	1	17208.7	16941	19104.5	2.1054	0.00934609
P34896_T368	SHMT1	sp|P34896|GLYC_HUMAN	P34896	GtDGGRAEKVLEACsIACNK	1	17208.7	16941	19104.5	2.1054	0.00934609
P33176_S933	KIF5B	sp|P33176|KINH_HUMAN	P33176	PIRPGQHPAAsPTHPSAIR	0.8852	0	0	0	0	0.00935972
Q5T200_S108	ZC3H13	sp|Q5T200|ZC3HD_HUMAN	Q5T200	NTEEsSSPVRK	0.9252	0	7829.93	0	0.125372	0.0094092
P33241_S177	LSP1	sp|P33241|LSP1_HUMAN	P33241	TPsPLVLEGTIEQSSPPLSPTTK;TPsPLVLEGTIEQSsPPLSPTTK;TPsPLVLEGtIEQSSPPLsPTTK	0.9198	5475.14	6915.96	3997.82	0.230635	0.00941315
Q92900_S1110	UPF1	sp|Q92900|RENT1_HUMAN	Q92900	SQIDVALsQDsTYQGER	0.959	13752.3	11152.7	10665	0.716616	0.00947037
Q13523_S437	PRP4K	sp|Q13523|PRP4K_HUMAN	Q13523	DAsPINRWsPTR;SKDAsPINRWsPTR	0.9741	35588.5	37741.9	45311.9	0.566361	0.00947601
P43487_T7	RANBP1	sp|P43487|RANG_HUMAN	P43487	DtHEDHDTSTENTDESNHDPQFEPIVSLPEQEIK	0.8629	9142.96	5103.46	2040.92	0.295411	0.00950921
Q96P48_S229	ARAP1	sp|Q96P48|ARAP1_HUMAN	Q96P48	LFPEFDDsDYDEVPEEGPGAPAR	0.9511	0	4756.43	5268.8	0.19117	0.00955976
P78347_S16	GTF2I	sp|P78347|GTF2I_HUMAN	P78347	AQVAMSTLPVEDEEsSESR	0.9687	14660.4	18616.4	18183.3	0.694863	0.00959103
P55081_S118	MFAP1	sp|P55081|MFAP1_HUMAN	P55081	IVEPEVVGEsDsEVEGDAWR	1	4037.4	5377.53	6225.99	0.328679	0.00966707
Q96AT1_S50	KIAA1143	sp|Q96AT1|K1143_HUMAN	Q96AT1	IQPQPPDEDGDHsDKEDEQPQVVVLK	1	39036.6	28097.7	41905.3	0.517887	0.0097474
Q5VYS8_S132	TUT7	sp|Q5VYS8|TUT7_HUMAN	Q5VYS8	KDsFQENEDGYR	0.9682	15533.1	19613.4	15687.3	1.74236	0.00974895
Q13459_T1271	MYO9B	sp|Q13459|MYO9B_HUMAN	Q13459	VSPPAPGsAPEtPEDK	0.9773	164221	214953	160694	2.14524	0.00976155
O00178_S24	GTPBP1	sp|O00178|GTPB1_HUMAN	O00178	SAMDSPVPASMFAPEPsSPGAAR	0.967	3640.12	7607.26	8255.99	0.491935	0.0097777
Q13283_S149	G3BP1	sp|Q13283|G3BP1_HUMAN	Q13283	YQDEVFGGFVTEPQEEsEEEVEEPEER	0.9765	208008	299812	231715	4.53483	0.00980768
Q7Z401_S1015	DENND4A	sp|Q7Z401|MYCPP_HUMAN	Q7Z401	HKsDNETNLQQQVVWGNR	0.9612	5003.91	6997.33	6507.45	0.661336	0.00986812
Q15555_S223	MAPRE2	sp|Q15555|MARE2_HUMAN	Q15555	PGSTPSRPSsAK;PGSTPSRPssAK	0.8995	14013	18750.7	10539.2	9.72962	0.00989501
Q96QH2_S334	PRAM1	sp|Q96QH2|PRAM_HUMAN	Q96QH2	TSsEPEFNSLPR;TSsEPEFNsLPR	0.97	23636.8	25590.1	20110.2	0.716822	0.00996786
Q13610_S50	PWP1	sp|Q13610|PWP1_HUMAN	Q13610	EKLQEEGGGsDEEETGSPSEDGMQSAR;EKLQEEGGGsDEEETGsPSEDGMQSAR;LQEEGGGsDEEETGSPSEDGMQSAR	0.9753	22142.7	22239	21598.3	0.862734	0.0100409
Q86U86_S14	PBRM1	sp|Q86U86|PB1_HUMAN	Q86U86	ATSPSSsVSGDFDDGHHSVSTPGPSR;ATsPSSsVSGDFDDGHHSVSTPGPSR	0.9669	83751.6	86035.7	78496	0.888683	0.0101068
Q16204_S323	CCDC6	sp|Q16204|CCDC6_HUMAN	Q16204	QLsESESSLEMDDER;QLsESESsLEMDDER	0.9668	6953.6	7521.91	8078.09	1.51667	0.0102031
O14646_S1683	CHD1	sp|O14646|CHD1_HUMAN	O14646	sPYGSRSPFEHsVEHK	0.8491	0	0	0	0	0.0102267
O14646_S1694	CHD1	sp|O14646|CHD1_HUMAN	O14646	sPYGSRSPFEHsVEHK	0.8404	0	0	0	0	0.0102267
A2RRP1_S473	NBAS	sp|A2RRP1|NBAS_HUMAN	A2RRP1	AGEEDEGEEDsDSDYEISAK	0.9619	13190.6	12599	12076.5	0.833214	0.0102486
P16615_S663	ATP2A2	sp|P16615|AT2A2_HUMAN	P16615	EFDELNPsAQR	1	14149.3	16057.6	15000.5	0.690231	0.010296
O75995_S113	SASH3	sp|O75995|SASH3_HUMAN	O75995	ALSEEMADTLEEGSASPTsPDYSLDSPGPEK;ALsEEMADTLEEGSASPTsPDYSLDSPGPEK	0.9662	3986.24	8628.44	5828.19	#DIV/0!	0.0103763
O94804_S514	STK10	sp|O94804|STK10_HUMAN	O94804	EMGsLSIKDPK	0.9724	26215	33755.8	39251.5	0.643651	0.0104082
P46013_S584	MKI67	sp|P46013|KI67_HUMAN	P46013	AQSLVISPPAPsPR	0.9753	14410.9	14970.1	15355.3	0.47948	0.0105623
Q9Y6G9_T512	DYNC1LI1	sp|Q9Y6G9|DC1L1_HUMAN	Q9Y6G9	KPVTVSPtTPTsPTEGEAS;KPVTVSPttPTSPTEGEAS	0.9572	60635.3	56053.8	47188.1	5.91963	0.010632
Q5JSP0_S128	FGD3	sp|Q5JSP0|FGD3_HUMAN	Q5JSP0	VTPQEEADsDVGEEPDSENTPQK	0.9759	25759.4	24424.5	24669.5	1.59177	0.010675
Q9Y383_S18	LUC7L2	sp|Q9Y383|LC7L2_HUMAN	Q9Y383	AMLDQLMGTsR	0.9535	4651.41	5818.11	7824.45	0.531627	0.010729
Q01082_S2341	SPTBN1	sp|Q01082|SPTB2_HUMAN	Q01082	AQTLPTSVVTITSESsPGK	0.9583	3253.92	7383.74	5416.62	#DIV/0!	0.01093
Q9NV56_S191	MRGBP	sp|Q9NV56|MRGBP_HUMAN	Q9NV56	VLTANsNPSsPSAAK;VLTANsNPsSPSAAK	0.972	12027.7	4306.06	11800.6	0.410211	0.0109765
Q9UK58_S341	CCNL1	sp|Q9UK58|CCNL1_HUMAN	Q9UK58	GLNPDGTPALSTLGGFsPASKPsSPR	0.94	0	0	4648.61	0.0709819	0.0109947
P49736_S7	MCM2	sp|P49736|MCM2_HUMAN	P49736	AESSEsFTMASsPAQR	0.9734	8585.2	15638.7	14375.6	0.536638	0.0111042
Q9NWQ8_S229	PAG1	sp|Q9NWQ8|PHAG1_HUMAN	Q9NWQ8	AEFAEYAsVDR	0.9747	21279	25844	17784.7	0.638782	0.0111673
Q86YS7_S657	C2CD5	sp|Q86YS7|C2CD5_HUMAN	Q86YS7	sQSESsDEVTELDLSHGK;sQsESSDEVTELDLSHGK	0.8646	42520.3	57829	27700.6	10.7222	0.0112495
Q9C0J8_S1279	WDR33	sp|Q9C0J8|WDR33_HUMAN	Q9C0J8	SSsLDGEHHDGYHR	0.9717	51406.9	67110.8	50720.4	1.93362	0.0113627
Q7Z5K2_S226	WAPL	sp|Q7Z5K2|WAPL_HUMAN	Q7Z5K2	RPESPsEIsPIK;RPEsPSEIsPIK;RPEsPSEIsPIKGSVR	0.9752	252530	257471	248039	0.791962	0.0115285
P08651_S333	NFIC	sp|P08651|NFIC_HUMAN	P08651	TEMDKsPFNSPsPQDSPR	0.9711	13955.8	14887.6	13818.8	0.791244	0.0117217
Q14160_S1225	SCRIB	sp|Q14160|SCRIB_HUMAN	Q14160	NsLESIsSIDR	0.9435	6992.54	12504.9	6325.01	#DIV/0!	0.0117313
Q9UQ35_S2690	SRRM2	sp|Q9UQ35|SRRM2_HUMAN	Q9UQ35	sLSYsPVER	0.8225	0	0	0	0	0.0118109
Q9H6F5_S47	CCDC86	sp|Q9H6F5|CCD86_HUMAN	Q9H6F5	ALVEFESNPEETREPGsPPSVQR;EPGsPPSVQR	0.9761	24487.5	30798.7	26550.5	1.61784	0.0118131
Q92890_S299	UFD1	sp|Q92890|UFD1_HUMAN	Q92890	FVAFSGEGQsLR	0.9698	4606.11	6251.9	6316.82	0.690185	0.0123572
Q9Y6X9_S739	MORC2	sp|Q9Y6X9|MORC2_HUMAN	Q9Y6X9	KRsVAVsDEEEVEEEAER;RsVAVsDEEEVEEEAER;sVAVsDEEEVEEEAER	1	32642.9	29619.1	21872	2.0829	0.0123795
Q8N9N8_S155	EIF1AD	sp|Q8N9N8|EIF1A_HUMAN	Q8N9N8	QYHEsEEEsEEEEAA	0.9664	33851.9	45725.9	38252.4	0.708094	0.0123953
Q8N9N8_S159	EIF1AD	sp|Q8N9N8|EIF1A_HUMAN	Q8N9N8	QYHEsEEEsEEEEAA;QyHESEEEsEEEEAA	0.9665	33851.9	45725.9	38252.4	0.708094	0.0123953
Q9UMZ2_S752	SYNRG	sp|Q9UMZ2|SYNRG_HUMAN	Q9UMZ2	QLsLEGSGLGVEDLK	0.975	3595.66	3796.09	4457.52	0.579776	0.0124494
P27361_Y204	MAPK3	sp|P27361|MK03_HUMAN	P27361	IADPEHDHTGFLTEyVATR;IADPEHDHTGFLtEyVATR	0.9675	6760.44	10411.7	4640.53	#DIV/0!	0.0125071
Q5TAQ9_S99	DCAF8	sp|Q5TAQ9|DCAF8_HUMAN	Q5TAQ9	VHDRsEEEEEEEEEEEEEQPR	1	48595.4	45704.4	47682	0.885014	0.0125442
Q9C0I1_S564	MTMR12	sp|Q9C0I1|MTMRC_HUMAN	Q9C0I1	QLsLPLTQSK	0.9755	4868.17	7576.68	8757.43	0.558585	0.012655
Q6NYC8_S145	PPP1R18	sp|Q6NYC8|PPR18_HUMAN	Q6NYC8	EERLsPR	1	17899.7	15499.2	17566.8	1.24818	0.012715
Q5UIP0_S1422	RIF1	sp|Q5UIP0|RIF1_HUMAN	Q5UIP0	RRsEVVESTTESQDK	0.9744	6082.53	10369.4	7880.14	3.04254	0.0127541
P33241_S208	LSP1	sp|P33241|LSP1_HUMAN	P33241	TEsLNRsIEK	0.9554	8630.39	12269.7	11169.4	1.80322	0.0128159
Q96MU7_S424	YTHDC1	sp|Q96MU7|YTDC1_HUMAN	Q96MU7	LSSESHHGGsPIHWVLPAGMSAK	0.9469	0	0	2269.07	0.126964	0.0128355
Q96QH2_S340	PRAM1	sp|Q96QH2|PRAM_HUMAN	Q96QH2	TSsEPEFNsLPR	0.9604	11869.6	0	6925.9	0.298481	0.012882
O75367_S170	MACROH2A1	sp|O75367|H2AY_HUMAN	O75367	AAsADStTEGTPADGFTVLSTK;AAsADsTTEGTPADGFTVLSTK	0.9443	23811.6	21657.3	16587.1	0.611545	0.0129148
O00193_S15	SMAP	sp|O00193|SMAP_HUMAN	O00193	sASPDDDLGSSNWEAADLGNEER	0.943	17896	23808.5	21225.6	0.265403	0.0129382
O14974_S507	PPP1R12A	sp|O14974|MYPT1_HUMAN	O14974	LAsTSDIEEK	0.9724	15040.7	17347.1	15055.5	2.49505	0.0129553
Q9Y2U8_S144	LEMD3	sp|Q9Y2U8|MAN1_HUMAN	Q9Y2U8	VLLGFSSDEsDVEASPR	0.9724	7848.62	0	0	0.156599	0.0131263
Q7Z6Z7_S3808	HUWE1	sp|Q7Z6Z7|HUWE1_HUMAN	Q7Z6Z7	REEsPMDVDQPsPSAQDTQSIASDGTPQGEK	0.8884	8453.15	0	9596.04	0.29863	0.013137
P28482_Y187	MAPK1	sp|P28482|MK01_HUMAN	P28482	VADPDHDHTGFLTEyVATR;VADPDHDHTGFLtEyVATR	0.9736	24032.8	35790.3	15831.7	43.7163	0.0133329
Q9NTJ3_S27	SMC4	sp|Q9NTJ3|SMC4_HUMAN	Q9NTJ3	EEGPPPPSPDGAssDAEPEPPSGR	0.9019	0	0	0	0	0.0134224
Q9UHD8_S30	SEPTIN9	sp|Q9UHD8|SEPT9_HUMAN	Q9UHD8	sFEVEEVETPNSTPPR	0.9762	16752.1	20251.1	18628.2	1.79087	0.013469
Q14161_Y392	GIT2	sp|Q14161|GIT2_HUMAN	Q14161	TINNQHSVESQDNDQPDyDsVASDEDTDLETTASK	0.8921	33962.3	22886.7	22347	0.421512	0.0134849
P49585_S323	PCYT1A	sp|P49585|PCY1A_HUMAN	P49585	MLQAIsPKQsPSSsPTR	0.9644	16469.9	0	20057.2	0.303419	0.0135245
Q9ULU4_S425	ZMYND8	sp|Q9ULU4|ZMYD8_HUMAN	Q9ULU4	RIsLSDMPR	0.9483	8855.54	8260.26	10949.9	1.67691	0.0135428
P35251_S69	RFC1	sp|P35251|RFC1_HUMAN	P35251	IIYDsDSESEETLQVK;IIYDsDsESEETLQVK	0.9641	19996.7	21837.8	16341.9	0.528765	0.0135815
Q6IQ49_S278	SDE2	sp|Q6IQ49|SDE2_HUMAN	Q6IQ49	VVNTDHGsPEQLQIPVTDSGR	0.9533	5828.79	4720.67	6807.73	0.666598	0.0136651
P46100_S706	ATRX	sp|P46100|ATRX_HUMAN	P46100	NsSDsAIDNPKPNK	0.941	5211.08	9084.82	5995.68	8.49968	0.0138349
Q9UJU6_S275	DBNL	sp|Q9UJU6|DBNL_HUMAN	Q9UJU6	AMSTTSISsPQPGK;AMsTTSISsPQPGK	0.9676	15405.9	15634.3	14997.6	1.90579	0.0139452
Q9UPN7_S635	PPP6R1	sp|Q9UPN7|PP6R1_HUMAN	Q9UPN7	IQQFDDDEEEEDEEEAQGsGEsDGEDGAWQGSQLAR	0.9746	16013.1	19501.3	13752.7	0.318227	0.0140407
Q9UPN7_S638	PPP6R1	sp|Q9UPN7|PP6R1_HUMAN	Q9UPN7	IQQFDDDEEEEDEEEAQGsGEsDGEDGAWQGSQLAR	0.9746	16013.1	19501.3	13752.7	0.318227	0.0140407
P34910_S268	EVI2B	sp|P34910|EVI2B_HUMAN	P34910	RTsIISLTPWKPSK;RTsIIsLTPWKPSK	0.9654	4497.87	0	4258.87	0.280431	0.0141006
O75995_S320	SASH3	sp|O75995|SASH3_HUMAN	O75995	LLTAAELLLDYDtGsEEAEEGAESSQEPVAHTVSEPK	0.8377	0	1675.53	3134.57	0.174661	0.0143296
O75995_T318	SASH3	sp|O75995|SASH3_HUMAN	O75995	LLTAAELLLDYDtGsEEAEEGAESSQEPVAHTVSEPK	0.8377	0	1675.53	3134.57	0.174661	0.0143296
O15164_S1042	TRIM24	sp|O15164|TIF1A_HUMAN	O15164	LKsIEER	1	44238.8	49652.5	54951.4	1.55406	0.0143482
O75676_S678	RPS6KA4	sp|O75676|KS6A4_HUMAN	O75676	GSSWLQDGsAR	0.967	3896.72	3539.79	7254.15	#DIV/0!	0.0143889
Q14161_S394	GIT2	sp|Q14161|GIT2_HUMAN	Q14161	TINNQHSVESQDNDQPDYDsVAsDEDTDLETTASK;TINNQHSVESQDNDQPDyDsVASDEDTDLETTASK	0.9465	34738.3	23032.1	23342.1	0.420171	0.0144409
Q96S99_S227	PLEKHF1	sp|Q96S99|PKHF1_HUMAN	Q96S99	QEEAEEQGAGsPGQPAHLAR	1	6311.5	7197.43	8465.15	0.716782	0.0144502
Q9HAW4_S954	CLSPN	sp|Q9HAW4|CLSPN_HUMAN	Q9HAW4	FTSQDAsTPASSELNK;FTsQDAsTPASSELNK	0.9572	5485.92	8499.46	8138.84	0.603304	0.0145237
Q5XUX1_S59	FBXW9	sp|Q5XUX1|FBXW9_HUMAN	Q5XUX1	PSQLStPAAsPSASEPR	0.8959	4678.6	0	0	0.165387	0.014598
Q5XUX1_T55	FBXW9	sp|Q5XUX1|FBXW9_HUMAN	Q5XUX1	PSQLStPAAsPSASEPR	0.8839	4678.6	0	0	0.165387	0.014598
Q8WZ73_S232	RFFL	sp|Q8WZ73|RFFL_HUMAN	Q8WZ73	VPAEDETQsIDSEDsFVPGR	0.8776	11686.9	15184.6	6020.05	#DIV/0!	0.0147798
P78559_S612	MAP1A	sp|P78559|MAP1A_HUMAN	P78559	GLDsGAEtEEEKDTWEEK	0.972	15544.7	20251.4	17539	0.710776	0.014872
P78559_T616	MAP1A	sp|P78559|MAP1A_HUMAN	P78559	GLDsGAEtEEEKDTWEEK	0.972	15544.7	20251.4	17539	0.710776	0.014872
Q8NDT2_S562	RBM15B	sp|Q8NDT2|RB15B_HUMAN	Q8NDT2	RNsLEGYSR	0.9739	21739.1	23044.1	26538.6	1.45029	0.0148742
Q16594_S149	TAF9	sp|Q16594|TAF9_HUMAN	Q16594	LsVGSVTSR	0.9744	5057.91	5212.74	3691.12	3.9422	0.0151061
Q9H8G2_S312	CAAP1	sp|Q9H8G2|CAAP1_HUMAN	Q9H8G2	SVNEILGLAESsPNEPK	0.9587	5005.49	6175.22	5806.57	1.64804	0.0151332
Q3KQU3_S446	MAP7D1	sp|Q3KQU3|MA7D1_HUMAN	Q3KQU3	QSLPAsPR	0.953	3566.75	4106.48	3673.15	0.607195	0.0152525
O75676_T687	RPS6KA4	sp|O75676|KS6A4_HUMAN	O75676	SSPPLRtPDVLESSGPAVR	0.7617	14443.9	24704.9	17468.4	3.1889	0.0152568
Q02880_S1522	TOP2B	sp|Q02880|TOP2B_HUMAN	Q02880	KVVEAVNsDSDsEFGIPK;KVVEAVNsDsDSEFGIPK;VVEAVNsDSDSEFGIPK;VVEAVNsDSDsEFGIPK;VVEAVNsDsDSEFGIPK	0.971	163218	133343	100692	0.529849	0.0153159
P11274_S463	BCR	sp|P11274|BCR_HUMAN	P11274	HQDGLPYIDDsPSSsPHLSSK	0.9601	11781.6	20994.1	8309.56	0.416529	0.0153174
Q86WR7_S179	PROSER2	sp|Q86WR7|PRSR2_HUMAN	Q86WR7	APsPPVEHPR	1	31515.1	29359.5	29575.9	1.2176	0.0153288
Q15388_S138	TOMM20	sp|Q15388|TOM20_HUMAN	Q15388	IVSAQsLAEDDVE	0.9627	12943.7	12572.1	10352.5	1.64235	0.0153705
P35269_S431	GTF2F1	sp|P35269|T2FA_HUMAN	P35269	LDTGPQsLSGKSTPQPPSGK;LDTGPQsLSGKStPQPPSGK	0.7693	5379.35	8299.5	5752.98	0.399176	0.0155268
Q9Y2Q0_T28	ATP8A1	sp|Q9Y2Q0|AT8A1_HUMAN	Q9Y2Q0	TDDVSEKtsLADQEEVR;TDDVsEKtSLADQEEVR	0.9502	10885.7	16877	11980.1	0.419432	0.0155649
Q9H0E9_S387	BRD8	sp|Q9H0E9|BRD8_HUMAN	Q9H0E9	APsIDGKEELDLAEK	1	7994.3	6670.4	7679.68	0.722307	0.0157106
Q96Q15_S3570	SMG1	sp|Q96Q15|SMG1_HUMAN	Q96Q15	NLATsADtPPSTVPGTGK	0.9701	19480.3	21057.6	15766.8	0.727687	0.0157543
Q8IWB9_S270	TEX2	sp|Q8IWB9|TEX2_HUMAN	Q8IWB9	TAPSSPLTsPSDTR;TAPSsPLTsPSDTR	0.9503	16145.4	24841.8	12833.1	5.0227	0.0160485
Q96DF8_S292	ESS2	sp|Q96DF8|ESS2_HUMAN	Q96DF8	ELIPQEsPR	1	14637.3	15513.6	13957.7	1.16865	0.0160541
Q9P0K1_S834	ADAM22	sp|Q9P0K1|ADA22_HUMAN	Q9P0K1	SNsWQGNLGGNK	0.9545	3968.02	0	0	0.186146	0.016075
P13796_S5	LCP1	sp|P13796|PLSL_HUMAN	P13796	GsVSDEEMMELR	0.9767	207853	244598	231000	1.37822	0.0160874
Q15910_T367	EZH2	sp|Q15910|EZH2_HUMAN	Q15910	LPNNSSRPStPTINVLESK;LPNNSsRPStPTINVLESK;PStPTINVLESK	0.9362	31218.9	44295	35283.6	1.90688	0.0161869
Q9BTE3_S154	MCMBP	sp|Q9BTE3|MCMBP_HUMAN	Q9BTE3	VsPSTSYTPSR	0.9759	32023.2	29566.6	32223.4	1.17562	0.0161987
Q92608_S1685	DOCK2	sp|Q92608|DOCK2_HUMAN	Q92608	VEQEEPIsPGSTLPEVK	0.9749	112549	100136	130363	1.80324	0.0162337
P22059_S382	OSBP	sp|P22059|OSBP1_HUMAN	P22059	TGsNIsGASSDISLDEQYK;tGSNIsGASSDISLDEQYK	0.9696	23840.8	24291.5	19016.2	0.655704	0.0164208
Q7L190_T215	DPPA4	sp|Q7L190|DPPA4_HUMAN	Q7L190	ARtPEAVESPQEASGVR;ARtPEAVEsPQEASGVR	0.9758	16627.2	15762.9	16068.6	1.32502	0.0165521
Q9UKV3_S216	ACIN1	sp|Q9UKV3|ACINU_HUMAN	Q9UKV3	SSSISEEKGDsDDEKPR;SSSIsEEKGDsDDEKPR;SSsISEEKGDsDDEKPR	0.9741	236212	280876	279685	1.29914	0.0165693
Q5VT52_S1099	RPRD2	sp|Q5VT52|RPRD2_HUMAN	Q5VT52	RMsGEPIQTVESIR	0.9214	3611.96	1993.41	2689.77	0.533303	0.0166568
Q9NYF8_S385	BCLAF1	sp|Q9NYF8|BCLF1_HUMAN	Q9NYF8	AEGEWEDQEALDYFsDK;AEGEWEDQEALDYFsDKESGK;AEGEWEDQEALDYFsDKEsGK;AEGEWEDQEALDYFsDKEsGKQK;AEGEWEDQEALDyFsDKESGKQK	0.9745	53678.2	54306	37765.7	0.48544	0.0169245
P35659_T13	DEK	sp|P35659|DEK_HUMAN	P35659	SASAPAAEGEGtPTQPASEKEPEMPGPR	0.9677	5955.79	8043.31	11294.5	0.431928	0.0169494
Q7Z6Z7_S3816	HUWE1	sp|Q7Z6Z7|HUWE1_HUMAN	Q7Z6Z7	REESPMDVDQPsPSAQDTQSIASDGTPQGEK;REESPMDVDQPsPSAQDTQSIAsDGTPQGEK;REEsPMDVDQPsPSAQDTQSIASDGTPQGEK	0.9611	19142.6	23897.4	29013.5	0.618199	0.0172307
Q9H2G2_S779	SLK	sp|Q9H2G2|SLK_HUMAN	Q9H2G2	DSGsISLQETR	0.9742	18721.9	37957.8	34689.6	0.566754	0.0173712
Q96T37_S700	RBM15	sp|Q96T37|RBM15_HUMAN	Q96T37	LLLERPsPIR;LLLERPsPIRDR	1	12544.5	12359.3	13266.6	0.789969	0.0174421
Q7Z6E9_S1625	RBBP6	sp|Q7Z6E9|RBBP6_HUMAN	Q7Z6E9	LsSDLTR	0.9745	12703.5	12837	10644.2	1.87536	0.0174596
P26358_S143	DNMT1	sp|P26358|DNMT1_HUMAN	P26358	SKsDGEAKPEPSPSPR	0.9745	51254.4	49706	66393.2	1.93846	0.0176826
Q9UKV3_S208	ACIN1	sp|Q9UKV3|ACINU_HUMAN	Q9UKV3	SSsISEEKGDsDDEKPR	0.9584	55354.5	76661.9	58206.3	1.71245	0.017766
Q7Z4H7_T584	HAUS6	sp|Q7Z4H7|HAUS6_HUMAN	Q7Z4H7	tPENLITEIR	0.9765	7016.46	12116.4	9738.26	3.18427	0.0178064
P28482_T185	MAPK1	sp|P28482|MK01_HUMAN	P28482	VADPDHDHTGFLtEyVATR	0.9728	22415.2	34469.6	13869.8	52.3462	0.0181368
O75643_S1319	SNRNP200	sp|O75643|U520_HUMAN	O75643	NSAFEsLYQDK	0.9261	101274	62592.8	78278.9	0.631005	0.0181695
Q9Y4F9_S573	RIPOR2	sp|Q9Y4F9|RIPR2_HUMAN	Q9Y4F9	LTsAEVPMATDR	0.7565	2418.6	3855.38	5921.76	34.5434	0.0181944
Q49A26_S130	GLYR1	sp|Q49A26|GLYR1_HUMAN	Q49A26	KLsLSEGK	0.9747	29428.7	30710.4	33996.7	1.24135	0.0183152
Q7Z6I6_S291	ARHGAP30	sp|Q7Z6I6|RHG30_HUMAN	Q7Z6I6	sIFNLGR	1	2867.66	0	3094.63	0.332739	0.0184137
P55010_S389	EIF5	sp|P55010|IF5_HUMAN	P55010	EAEEEssGGEEEDEDENIEVVYSK	0.9681	1765.58	0	0	0.0520053	0.0184138
P55010_S390	EIF5	sp|P55010|IF5_HUMAN	P55010	EAEEEssGGEEEDEDENIEVVYSK	0.9681	1765.58	0	0	0.0520053	0.0184138
P46379_S973	BAG6	sp|P46379|BAG6_HUMAN	P46379	AsPEPQRENAsPAPGTTAEEAMSR;ENAsPAPGTTAEEAMSR	0.9763	26931.9	24460.3	23582.2	0.785503	0.0185716
Q6PKG0_S631	LARP1	sp|Q6PKG0|LARP1_HUMAN	Q6PKG0	NTFTAWSDEEsDYEIDDR;NTFTAWsDEEsDYEIDDR	0.9639	11524.4	15711.7	10976.1	0.449748	0.0185912
Q9NRY4_S589	ARHGAP35	sp|Q9NRY4|RHG35_HUMAN	Q9NRY4	NsLSDPNIDR	0.9761	8192.7	12213.4	9491.44	2.11533	0.0186192
Q9HDC5_S479	JPH1	sp|Q9HDC5|JPH1_HUMAN	Q9HDC5	HSHsPASsPKPLK;HSHsPASsPKPLKK;HsHSPASsPKPLK	0.9506	12875.7	20901	19513	0.528834	0.0186242
Q9UQ35_S1693	SRRM2	sp|Q9UQ35|SRRM2_HUMAN	Q9UQ35	RSSRsSPELTR;RSsRsSPELTR;SSRssPELTR;sSPELTR	0.9236	55244.1	94511.8	53000.5	0.562627	0.0186522
Q8WVM8_S303	SCFD1	sp|Q8WVM8|SCFD1_HUMAN	Q8WVM8	VNLEESSGVENsPAGAR;VNLEESSGVENsPAGARPK	0.9708	8962.71	8183.1	9694.73	0.827239	0.0187282
P04792_S82	HSPB1	sp|P04792|HSPB1_HUMAN	P04792	QLsSGVSEIR	0.9758	100039	97067	138529	1.99103	0.0190224
O75376_S2151	NCOR1	sp|O75376|NCOR1_HUMAN	O75376	SHVSSEPYEPIsPPQVPVVHEK	0.9439	3960.99	3292.03	3308.96	3.18065	0.019061
P16949_S46	STMN1	sp|P16949|STMN1_HUMAN	P16949	DLsLEEIQK	1	13279.4	13978.6	11932.9	1.28905	0.0190971
Q9H6F5_S113	CCDC86	sp|Q9H6F5|CCD86_HUMAN	Q9H6F5	QPEYSPEsPR;QQDLHLEsPQRQPEYSPEsPR	0.9752	29398.5	34805	20352.3	0.580318	0.0194891
Q92974_T945	ARHGEF2	sp|Q92974|ARHG2_HUMAN	Q92974	LQDSSDPDtGSEEEGSSRLSPPHsPR	0.8383	33484.1	0	0	0.184881	0.0195059
Q8NI08_S208	NCOA7	sp|Q8NI08|NCOA7_HUMAN	Q8NI08	VLsSTsEEDEPGVVK	0.9663	17152.2	18962	14012.1	2.1985	0.0195198
Q8NI08_S211	NCOA7	sp|Q8NI08|NCOA7_HUMAN	Q8NI08	VLsSTsEEDEPGVVK	0.9662	17152.2	18962	14012.1	2.1985	0.0195198
Q92882_S213	OSTF1	sp|Q92882|OSTF1_HUMAN	Q92882	TLSNAEDYLDDEDsD;TLsNAEDYLDDEDsD;tLSNAEDYLDDEDsD	0.9765	208274	173120	195213	1.41056	0.019817
Q6NYC8_S224	PPP1R18	sp|Q6NYC8|PPR18_HUMAN	Q6NYC8	LsPGESAYQK	0.9746	8942.09	10144.8	10793.2	1.37289	0.0198194
P52948_S608	NUP98	sp|P52948|NUP98_HUMAN	P52948	NLNNsNLFSPVNR	0.9758	19828	20075.2	20333.4	1.32505	0.0200017
Q9BQF6_S11	SENP7	sp|Q9BQF6|SENP7_HUMAN	Q9BQF6	RPsSSEIITEGK	0.7993	17025.2	14191.5	16302.6	1.83332	0.020084
P42696_S14	RBM34	sp|P42696|RBM34_HUMAN	P42696	KRsVQEGENPDDGVR;sVQEGENPDDGVR	1	33641.4	33867.5	35365	1.25202	0.0201779
O60832_S453	DKC1	sp|O60832|DKC1_HUMAN	O60832	KRESEsEsDETPPAAPQLIK;KREsEsESDETPPAAPQLIK	0.9691	58248.2	56426.6	15034.1	0.348915	0.0202969
Q02880_S1524	TOP2B	sp|Q02880|TOP2B_HUMAN	Q02880	KVVEAVNSDsDsEFGIPK;KVVEAVNsDsDSEFGIPK;VVEAVNSDsDSEFGIPK;VVEAVNsDsDSEFGIPK	0.971	148071	146872	94354.5	0.552216	0.0204411
Q9BXB4_S189	OSBPL11	sp|Q9BXB4|OSB11_HUMAN	Q9BXB4	RPsQNAISFFNVGHSK	0.9742	4319.87	4445.42	4590.81	0.507338	0.0204671
Q13129_S632	RLF	sp|Q13129|RLF_HUMAN	Q13129	sPSAIPEQNHSLNDQAK	0.9708	11316.1	12772.6	11947.9	1.24104	0.0205003
P18583_S1697	SON	sp|P18583|SON_HUMAN	P18583	ESDQTLAALLsPK	0.9761	14961.6	21352.4	22027.4	0.643491	0.0205198
Q96BY6_S12	DOCK10	sp|Q96BY6|DOC10_HUMAN	Q96BY6	sLLRPGQAAELR	1	11138.1	7335.5	8427.52	0.624512	0.0206582
Q9BYG3_T223	NIFK	sp|Q9BYG3|MK67I_HUMAN	Q9BYG3	VSGTLDtPEK	0.9714	8995.26	11608.6	9600.03	0.750864	0.0211141
Q9HDC5_S216	JPH1	sp|Q9HDC5|JPH1_HUMAN	Q9HDC5	RGsLLGsMK	1	7935.96	9157.62	8456.44	0.68164	0.0211712
Q9HDC5_S220	JPH1	sp|Q9HDC5|JPH1_HUMAN	Q9HDC5	RGsLLGsMK	1	7935.96	9157.62	8456.44	0.68164	0.0211712
O43561_S91	LAT	sp|O43561|LAT_HUMAN	O43561	sPQPLGGsHR	1	15282.8	23954.1	16753.3	2.41551	0.0212075
Q96JM3_S443	CHAMP1	sp|Q96JM3|CHAP1_HUMAN	Q96JM3	KPsGSPDLWKLsPDQR	0.8895	29541	39777.3	20873.7	0.452222	0.0215378
Q6KC79_S2658	NIPBL	sp|Q6KC79|NIPBL_HUMAN	Q6KC79	AITSLLGGGsPK	0.9753	49450.9	48286.3	48461.8	1.20616	0.0216322
O00566_S163	MPHOSPH10	sp|O00566|MPP10_HUMAN	O00566	KsPVFSDEDsDLDFDISK	0.9082	0	0	0	0	0.021661
O00566_S171	MPHOSPH10	sp|O00566|MPP10_HUMAN	O00566	KsPVFSDEDsDLDFDISK	0.9054	0	0	0	0	0.021661
Q5R372_S490	RABGAP1L	sp|Q5R372|RBG1L_HUMAN	Q5R372	ESDKEEPVTPTSGGGPMSPQDDEAEEEsDNELSSGTGDVSK;ESDKEEPVtPTSGGGPMSPQDDEAEEEsDNELSSGTGDVSK	0.9548	8043.2	9779.17	5484.53	6.12254	0.0217113
P49848_S653	TAF6	sp|P49848|TAF6_HUMAN	P49848	QEAGDsPPPAPGtPK	1	15934.1	24766.5	21831.3	0.645281	0.0218659
P49848_T660	TAF6	sp|P49848|TAF6_HUMAN	P49848	QEAGDsPPPAPGtPK	1	15934.1	24766.5	21831.3	0.645281	0.0218659
Q5UIP0_S1579	RIF1	sp|Q5UIP0|RIF1_HUMAN	Q5UIP0	SNEsVDIQDQEEK	0.9754	19726	22194.2	20249.5	1.69823	0.0219921
O75367_S173	MACROH2A1	sp|O75367|H2AY_HUMAN	O75367	AASADsTTEGTPADGFTVLSTK;AASADstTEGTPADGFTVLSTK;AAsADsTTEGTPADGFTVLSTK	0.9443	24099.4	22339.1	20111.7	0.751603	0.0220253
Q86WB0_S359	ZC3HC1	sp|Q86WB0|ZC3C1_HUMAN	Q86WB0	SWDSSsPVDRPEPEAAsPTTR	0.9657	4975.45	8867.7	4560.23	0.535618	0.0220526
Q9BVG9_S16	PTDSS2	sp|Q9BVG9|PTSS2_HUMAN	Q9BVG9	DAGGPRPEsPVPAGR	1	23761.7	27858.4	25980.4	1.25611	0.0223207
Q92538_S1781	GBF1	sp|Q92538|GBF1_HUMAN	Q92538	AASSsSPGsPVASSPSR	0.9704	33774.2	48826.1	38817.5	1.70103	0.0223651
O00470_S196	MEIS1	sp|O00470|MEIS1_HUMAN	O00470	EGGSKsDSEDITR	0.9633	23465.7	28588.1	25600.6	3.04644	0.0224765
Q9UIF9_S1783	BAZ2A	sp|Q9UIF9|BAZ2A_HUMAN	Q9UIF9	YSEEGLsPSK;YSEEGLsPSKR	0.9733	8973.8	9880.38	10201.8	1.21768	0.0225514
Q9UBW5_S273	BIN2	sp|Q9UBW5|BIN2_HUMAN	Q9UBW5	TATVSsPLTSPTSPSTLSLK;TATVSsPLTSPTsPSTLSLK;TATVSsPLTSPtSPSTLSLK;TATVSsPLTsPTSPSTLSLK	0.9711	31103.7	42457.2	28316.2	1.86063	0.0226259
Q9Y2W1_S575	THRAP3	sp|Q9Y2W1|TR150_HUMAN	Q9Y2W1	MDsFDEDLAR	1	14021.1	19541.1	15868.5	1.55399	0.0227361
A0FGR8_S758	ESYT2	sp|A0FGR8|ESYT2_HUMAN	A0FGR8	EPTPSIAsDIsLPIATQELR	0.9004	0	5435.5	4642.6	0.276143	0.0228504
A0FGR8_S761	ESYT2	sp|A0FGR8|ESYT2_HUMAN	A0FGR8	EPTPSIAsDIsLPIATQELR	0.9004	0	5435.5	4642.6	0.276143	0.0228504
Q15596_S771	NCOA2	sp|Q15596|NCOA2_HUMAN	Q15596	LDsKTDPASNTK	0.959	8535.78	7833.73	10861.5	1.96861	0.0235429
Q9NYF8_S389	BCLAF1	sp|Q9NYF8|BCLF1_HUMAN	Q9NYF8	AEGEWEDQEALDYFSDKEsGK;AEGEWEDQEALDYFsDKEsGK;AEGEWEDQEALDYFsDKEsGKQK	0.961	10048.6	9870.45	6588.99	0.516351	0.0235562
P38398_S1330	BRCA1	sp|P38398|BRCA1_HUMAN	P38398	HQSEsQGVGLSDKELVsDDEER	0.9345	0	0	16739.1	0.215822	0.0236303
Q92609_S730	TBC1D5	sp|Q92609|TBCD5_HUMAN	Q92609	GsFSGQAQPLR	0.9752	16220.3	17121.5	13591.7	1.41416	0.0236629
Q9H1B7_S547	IRF2BPL	sp|Q9H1B7|I2BPL_HUMAN	Q9H1B7	KAsPEPPDSAEGALK	0.9762	33600.7	32555.7	36105.5	1.15464	0.0240476
Q70Z53_S12	FRA10AC1	sp|Q70Z53|F10C1_HUMAN	Q70Z53	MHGHGGYDsDFsDDER	0.9644	2927.51	4823.48	2986.57	0.557908	0.0241108
Q70Z53_S9	FRA10AC1	sp|Q70Z53|F10C1_HUMAN	Q70Z53	MHGHGGYDsDFsDDER	0.9643	2927.51	4823.48	2986.57	0.557908	0.0241108
O14745_S288	NHERF1	sp|O14745|NHRF1_HUMAN	O14745	sASSDTSEELNSQDSPPK;sASSDtSEELNSQDSPPK	0.8721	129363	140100	125309	4.57386	0.0241749
Q96D71_S272	REPS1	sp|Q96D71|REPS1_HUMAN	Q96D71	RQsSSYDDPWK	0.9524	8095.32	0	11803.1	0.349801	0.0242406
Q13043_S320	STK4	sp|Q13043|STK4_HUMAN	Q13043	EVDQDDEENsEEDEMDSGTMVR	0.9722	5399.95	7227.63	6524.54	0.583524	0.0242472
Q6QNY0_S65	BLOC1S3	sp|Q6QNY0|BL1S3_HUMAN	Q6QNY0	VAGEAAEtDsEPEPEPEPTAAPR	0.9732	5521.72	10132	5928.51	0.395367	0.0242733
Q6QNY0_T63	BLOC1S3	sp|Q6QNY0|BL1S3_HUMAN	Q6QNY0	VAGEAAEtDsEPEPEPEPTAAPR	0.9732	5521.72	10132	5928.51	0.395367	0.0242733
Q92974_S886	ARHGEF2	sp|Q92974|ARHG2_HUMAN	Q92974	sLPAGDALYLSFNPPQPSR	0.9732	3099.52	12564.9	10799.8	0.270709	0.0243551
Q92994_S450	BRF1	sp|Q92994|TF3B_HUMAN	Q92994	DASGDGELDLsGIDDLEIDR	0.9736	1292.47	3584.33	3288.25	0.505037	0.0245742
O60315_S1124	ZEB2	sp|O60315|ZEB2_HUMAN	O60315	AYLQSITPQGYSDsEEREsMPR;AYLQSITPQGYsDsEERESMPR	0.9526	5010.14	0	8282.03	0.295339	0.0246496
P40222_S515	TXLNA	sp|P40222|TXLNA_HUMAN	P40222	RPEGPGAQAPSsPR	0.9612	52914.3	41882.4	48339.8	1.35355	0.0249454
P41212_S293	ETV6	sp|P41212|ETV6_HUMAN	P41212	LsEDGLHR	1	7137.03	9656.28	7884.39	2.98897	0.0250231
O75569_S18	PRKRA	sp|O75569|PRKRA_HUMAN	O75569	AEAPPLEREDsGTFSLGK;EDsGTFSLGK	0.9756	81142.2	64129.3	75678.8	1.48473	0.0250306
P46013_S3041	MKI67	sp|P46013|KI67_HUMAN	P46013	GKsSEPVVIMK	0.9716	8750.21	10624.9	14935.1	2.34372	0.0251358
Q9UHR5_S52	SAP30BP	sp|Q9UHR5|S30BP_HUMAN	Q9UHR5	GGLVSDAYGEDDFsR	0.959	3001.75	3706.62	4719.39	0.63621	0.0251529
O75971_S96	SNAPC5	sp|O75971|SNPC5_HUMAN	O75971	SHVTEEEEEEEEEEsDS	0.9642	9766.84	11312.4	6843.41	4.13311	0.0252583
P05388_S307	RPLP0	sp|P05388|RLA0_HUMAN	P05388	EESEEsDEDMGFGLFD;EEsEEsDEDMGFGLFD;VEAKEESEEsDEDMGFGLFD;VEAKEEsEEsDEDMGFGLFD	1	473874	652544	532138	0.585921	0.0252828
P55081_T267	MFAP1	sp|P55081|MFAP1_HUMAN	P55081	SLAALDALNtDDENDEEEYEAWK	0.9723	2969.74	7175.89	5479.04	0.229208	0.0253291
Q6WCQ1_S220	MPRIP	sp|Q6WCQ1|MPRIP_HUMAN	Q6WCQ1	DQPDGSSLsPAQsPSQSQPPAASSLR	0.9697	8399.62	16424.7	6625.67	#DIV/0!	0.0254064
Q6WCQ1_S224	MPRIP	sp|Q6WCQ1|MPRIP_HUMAN	Q6WCQ1	DQPDGSSLsPAQsPSQSQPPAASSLR	0.971	8399.62	16424.7	6625.67	#DIV/0!	0.0254064
Q9UBM7_S14	DHCR7	sp|Q9UBM7|DHCR7_HUMAN	Q9UBM7	AKsLDGVTNDR;sLDGVTNDR	0.9766	21152	21607.9	25265.1	1.33289	0.0254418
Q9BXW9_S1435	FANCD2	sp|Q9BXW9|FACD2_HUMAN	Q9BXW9	ATEDGEEDEVsAGEK	0.9723	8054.1	10342.8	9507.43	1.35609	0.0255205
Q96PK6_S215	RBM14	sp|Q96PK6|RBM14_HUMAN	Q96PK6	DRsPLRR	1	241869	183520	232418	0.648464	0.0257354
P29590_S565	PML	sp|P29590|PML_HUMAN	P29590	VVVISSSEDsDAENSSSR	0.9609	4098.08	5042.17	0	0.348553	0.0258702
P23588_S406	EIF4B	sp|P23588|IF4B_HUMAN	P23588	ERHPsWR;ERHPsWRsEETQER;HPsWRsEETQER	1	48143	62139.3	53114.8	0.755707	0.0259457
O94880_S835	PHF14	sp|O94880|PHF14_HUMAN	O94880	sFVPEEEKHEER	1	35904.2	52649.9	33699.5	2.10479	0.0260583
Q9ULH0_S1521	KIDINS220	sp|Q9ULH0|KDIS_HUMAN	Q9ULH0	LPsDEDEsGTEESDNTPLLK	0.9502	6655.96	0	2754.37	0.197079	0.0261652
Q9ULH0_S1526	KIDINS220	sp|Q9ULH0|KDIS_HUMAN	Q9ULH0	LPsDEDEsGTEESDNTPLLK	0.9495	6655.96	0	2754.37	0.197079	0.0261652
O95747_S339	OXSR1	sp|O95747|OXSR1_HUMAN	O95747	TEDGGWEWsDDEFDEESEEGK	0.9749	26637.8	36766.8	33943.3	0.530024	0.0261659
P52948_S888	NUP98	sp|P52948|NUP98_HUMAN	P52948	YGLQDsDEEEEEHPSK	0.9757	56484.8	59440.1	65563.6	0.831719	0.0262682
Q96T83_S693	SLC9A7	sp|Q96T83|SL9A7_HUMAN	Q96T83	TKsSSEEVLER	0.937	4839.01	3956.74	5911.71	1.66959	0.0263573
Q5SW79_S466	CEP170	sp|Q5SW79|CE170_HUMAN	Q5SW79	SSGsLGHRPSQEMDK	0.9632	6070.52	7488.14	8854.16	3.05484	0.026703
Q53GS9_S82	USP39	sp|Q53GS9|UBP39_HUMAN	Q53GS9	EREVDEDsEPER;EREVDEDsEPEREVR;EVDEDsEPER	1	76351.6	75734.8	65962.9	1.24569	0.0268597
Q93009_T30	USP7	sp|Q93009|UBP7_HUMAN	Q93009	AGEQQLSEPEDMEMEAGDtDDPPR	0.8524	0	0	4876.67	0.14023	0.0269121
Q6JBY9_S83	RCSD1	sp|Q6JBY9|CPZIP_HUMAN	Q6JBY9	SsPLIEK;VKSsPLIEK	0.9699	38330	35619.6	50013.1	3.06604	0.0269145
Q15424_S247	SAFB	sp|Q15424|SAFB1_HUMAN	Q15424	SEPVKEESSELEQPFAQDTSsVGPDR	0.9657	29016.3	37061.1	24833.8	1.78995	0.0271029
Q99733_S125	NAP1L4	sp|Q99733|NP1L4_HUMAN	Q99733	EFITGDVEPTDAESEWHsENEEEEK;REFITGDVEPTDAESEWHsENEEEEK	0.9743	173763	175737	222888	0.745393	0.0272407
Q9NV56_S194	MRGBP	sp|Q9NV56|MRGBP_HUMAN	Q9NV56	VLTANsNPsSPSAAK	0.8158	9977.65	664.12	9594.41	0.394149	0.0273934
Q9H0D6_T478	XRN2	sp|Q9H0D6|XRN2_HUMAN	Q9H0D6	MQNNSSPSISPNtSFTSDGSPSPLGGIK	0.8206	3380.9	6456.33	5075.77	0.177407	0.0279584
Q8N3D4_S1273	EHBP1L1	sp|Q8N3D4|EH1L1_HUMAN	Q8N3D4	AHGsFSHVR	0.968	3651.86	5251.26	2995.07	2.4968	0.0280713
Q1KMD3_S228	HNRNPUL2	sp|Q1KMD3|HNRL2_HUMAN	Q1KMD3	SKsPLPPEEEAKDEEEDQTLVNLDTYTSDLHFQVSK	0.9673	48971.4	61505.3	25808.1	6.33403	0.0283262
Q96S55_S65	WRNIP1	sp|Q96S55|WRIP1_HUMAN	Q96S55	GPsPPGAK	1	21099.3	32362	26114.5	2.18444	0.028425
Q5T200_S137	ZC3H13	sp|Q5T200|ZC3HD_HUMAN	Q5T200	ERtPEsEEENVEWETNR	0.9585	0	5681.54	2659.51	0.304451	0.0288175
Q5T200_T134	ZC3H13	sp|Q5T200|ZC3HD_HUMAN	Q5T200	ERtPEsEEENVEWETNR	0.9586	0	5681.54	2659.51	0.304451	0.0288175
Q9Y520_S2105	PRRC2C	sp|Q9Y520|PRC2C_HUMAN	Q9Y520	LPDLsPVENK	1	17027.8	18292.5	16073.8	1.18986	0.0289588
P18615_S115	NELFE	sp|P18615|NELFE_HUMAN	P18615	SIsADDDLQESSR	0.9758	119895	120345	181572	2.01146	0.0289654
P27816_S825	MAP4	sp|P27816|MAP4_HUMAN	P27816	sPSTLLPK	0.9724	16471.5	18684.2	15736.1	1.22943	0.0290892
Q02952_S612	AKAP12	sp|Q02952|AKA12_HUMAN	Q02952	EGVTPWAsFK;EGVTPWAsFKK;EGVtPWAsFKK	1	10999.7	15117.2	19168.7	0.628097	0.0291095
O75379_S30	VAMP4	sp|O75379|VAMP4_HUMAN	O75379	NLLEDDsDEEEDFFLR	1	7638.35	13124.2	14935.5	0.549373	0.0292717
Q7Z5L9_S240	IRF2BP2	sp|Q7Z5L9|I2BP2_HUMAN	Q7Z5L9	RPAsVSSSAAVEHEQR	0.9652	14999.1	12582.8	16356.3	2.97059	0.0293894
P48651_S11	PTDSS1	sp|P48651|PTSS1_HUMAN	P48651	TLsKDDVNYK	0.96	6000.52	4680.85	7129.07	3.05321	0.0294728
O75376_S1981	NCOR1	sp|O75376|NCOR1_HUMAN	O75376	YETPSDAIEVIsPASsPAPPQEK	0.965	0	0	0	0	0.0295888
O75717_S868	WDHD1	sp|O75717|WDHD1_HUMAN	O75717	NQVEEDAEDsGEADDEEKPEIHKPGQNSFSK	0.9714	10302.5	4819.52	5541.56	0.376549	0.0297444
Q32P44_S204	EML3	sp|Q32P44|EMAL3_HUMAN	Q32P44	DPLSSPGGPGsR	0.9684	2984.77	3421.31	2045.4	3.27213	0.0298639
Q9UBF8_S511	PI4KB	sp|Q9UBF8|PI4KB_HUMAN	Q9UBF8	RLsEQLAHTPTAFK	0.9738	12894.6	11242.4	11026.7	0.839372	0.0298803
O95835_S613	LATS1	sp|O95835|LATS1_HUMAN	O95835	QITTsPITVR	0.9515	4529.39	5348.45	6445.7	0.712297	0.0298974
P31323_S83	PRKAR2B	sp|P31323|KAP3_HUMAN	P31323	GVNFAEEPMQsDSEDGEEEEAAPADAGAFNAPVINR	0.8385	0	2661.5	0	0.198787	0.0298998
O75448_S862	MED24	sp|O75448|MED24_HUMAN	O75448	LLsSNEDDANILSSPTDR;LLsSNEDDANILSsPTDR	0.9696	28577.4	35212.3	26216.8	1.48483	0.0299438
Q03111_S292	MLLT1	sp|Q03111|ENL_HUMAN	Q03111	RPATADsPKPSAK	0.9747	13296.9	13685.3	12814.2	0.783799	0.0299589
Q5JQS6_T35	GCSAML	sp|Q5JQS6|GSAML_HUMAN	Q5JQS6	QEMTtFER	0.9502	3554.23	0	6238.8	0.316642	0.0301628
P78362_S497	SRPK2	sp|P78362|SRPK2_HUMAN	P78362	TVsASsTGDLPK	0.9694	66745.4	72678.1	57645.8	1.28172	0.0301793
P46100_S703	ATRX	sp|P46100|ATRX_HUMAN	P46100	NsSDSAIDNPKPNK;NsSDsAIDNPKPNK	0.9649	5400.35	8412.52	6828.76	1.83794	0.030307
Q96JM3_S319	CHAMP1	sp|Q96JM3|CHAP1_HUMAN	Q96JM3	RPAPAVSPGsWKPGPPGsPR;RPAPAVsPGSWKPGPPGsPR	0.9715	13730.1	25195.5	15466.2	0.520624	0.0303416
Q7Z2W4_S378	ZC3HAV1	sp|Q7Z2W4|ZCCHV_HUMAN	Q7Z2W4	TVFsPTLPAAR	0.973	12181.6	12366	13830.7	1.31331	0.0304575
Q2KHR2_S1178	RFX7	sp|Q2KHR2|RFX7_HUMAN	Q2KHR2	NLsGSTLYPVSNIPR	0.9735	7662.67	11378	9712.96	2.22257	0.0305229
Q8NDT2_T532	RBM15B	sp|Q8NDT2|RB15B_HUMAN	Q8NDT2	DRtPPHLLYSDR	0.9749	29767.3	32161.4	30226.3	1.123	0.0305857
P23763_S63	VAMP1	sp|P23763|VAMP1_HUMAN	P23763	DQKLsELDDR	1	13450	17276.6	12311	1.55538	0.0306043
Q5JQS6_S94	GCSAML	sp|Q5JQS6|GSAML_HUMAN	Q5JQS6	SSLSSNDDGYENIDsLTR;SSLSsNDDGYENIDsLTR;SsLSSNDDGYENIDsLTR;sSLSSNDDGYENIDsLTR	0.9733	26718.5	29357.6	23154.7	0.810689	0.0306404
Q9H0W8_S53	SMG9	sp|Q9H0W8|SMG9_HUMAN	Q9H0W8	DAsEETSTSVMQK	0.975	5908.95	9598.08	7923.52	0.647627	0.0308102
Q9P2K3_S156	RCOR3	sp|Q9P2K3|RCOR3_HUMAN	Q9P2K3	HNQGDsDDDVEETHPMDGNDSDYDPK;HNQGDsDDDVEETHPMDGNDsDYDPK;HNQGDsDDDVEETHPMDGNDsDYDPKK	0.962	33783.5	43664.1	35782	0.784755	0.0309244
P67809_S314	YBX1	sp|P67809|YBOX1_HUMAN	P67809	AADPPAENSsAPEAEQGGAE	0.9721	80726.3	96081	93719.3	0.814053	0.0309609
Q9BVP2_T512	GNL3	sp|Q9BVP2|GNL3_HUMAN	Q9BVP2	EDDKDsDQETVDEEVDENSSGMFAAEEtGEALSEETTAGEQSTR	0.8285	3105.91	8173.93	4004.37	#DIV/0!	0.0309884
O75376_S1977	NCOR1	sp|O75376|NCOR1_HUMAN	O75376	YETPSDAIEVIsPASSPAPPQEK;YETPSDAIEVIsPASsPAPPQEK	0.9655	0	0	0	0	0.0312064
Q66K74_S657	MAP1S	sp|Q66K74|MAP1S_HUMAN	Q66K74	LSLsPLR	0.9732	12551.2	10613.9	11531.6	0.854589	0.031231
P57081_S391	WDR4	sp|P57081|WDR4_HUMAN	P57081	RRsPPPGPDGHAK	1	8487.26	8233.35	4906.41	0.536987	0.0315272
P15531_S120	NME1	sp|P15531|NDKA_HUMAN	P15531	NIIHGsDSVESAEK	0.9678	8535.51	6946.9	7590.9	0.750246	0.0315386
Q14498_S127	RBM39	sp|Q14498|RBM39_HUMAN	Q14498	sKsPFRK	1	324407	348351	283593	0.628186	0.0316318
Q14498_S129	RBM39	sp|Q14498|RBM39_HUMAN	Q14498	sKsPFRK	1	324407	348351	283593	0.628186	0.0316318
P33991_S120	MCM4	sp|P33991|MCM4_HUMAN	P33991	QRPDLGsAQK	1	28002.3	34859.5	35480	0.769896	0.0316319
Q6PCE3_S175	PGM2L1	sp|Q6PCE3|PGM2L_HUMAN	Q6PCE3	AVAGVMITAsHNR	0.9713	9209.84	11496.7	13679.6	0.655928	0.0316327
O95544_S46	NADK	sp|O95544|NADK_HUMAN	O95544	sLSASPALGSTK	0.9722	6049.64	7410.59	5770.45	1.42801	0.0316609
Q04724_S286	TLE1	sp|Q04724|TLE1_HUMAN	Q04724	DASSsPASTASSASSTSLK	0.9374	8655.58	11179.9	10128.8	1.61829	0.0316706
Q9UKV3_S561	ACIN1	sp|Q9UKV3|ACINU_HUMAN	Q9UKV3	RAsHTLLPSHR	0.9704	29799.1	37774.8	28465.5	1.50085	0.031719
P05114_S89	HMGN1	sp|P05114|HMGN1_HUMAN	P05114	EDLPAENGETKTEEsPAsDEAGEK;TEESPAsDEAGEK;TEEsPAsDEAGEK	0.9755	41248.9	62846.1	43848	1.94111	0.0317927
O43815_S245	STRN	sp|O43815|STRN_HUMAN	O43815	FLESAAADFsDEDEDDDVDGR	0.9765	45294.1	35211.9	54192.3	0.524144	0.0320186
Q9BZL4_S407	PPP1R12C	sp|Q9BZL4|PP12C_HUMAN	Q9BZL4	sPVQLEEAPFSR	0.9733	4746.34	10114.5	5696.9	5.86746	0.0320483
Q9UQ35_S857	SRRM2	sp|Q9UQ35|SRRM2_HUMAN	Q9UQ35	QGSITsPQANEQSVTPQRR;QGSITsPQANEQSVtPQR;QGSITsPQANEQSVtPQRR	0.9727	114275	147509	130056	0.778272	0.0321492
Q6Y7W6_S236	GIGYF2	sp|Q6Y7W6|GGYF2_HUMAN	Q6Y7W6	WRPHsPDGPR	1	24347.2	32989.1	35565.7	0.737224	0.0322316
P42167_S66	TMPO	sp|P42167|LAP2B_HUMAN	P42167	GPPDFsSDEEREPtPVLGSGAAAAGR;GPPDFssDEEREPTPVLGSGAAAAGR	0.9725	19893.8	20731.9	10386.6	0.426842	0.0323128
Q15910_S363	EZH2	sp|Q15910|EZH2_HUMAN	Q15910	LPNNSsRPStPTINVLESK;LPNNSsRPsTPTINVLESK	0.9289	26891	0	0	0.225389	0.0324884
Q14155_S694	ARHGEF7	sp|Q14155|ARHG7_HUMAN	Q14155	KPsDEEFASR	0.9555	15213.7	18125.8	17586.3	1.29853	0.0326031
P42331_S362	ARHGAP25	sp|P42331|RHG25_HUMAN	P42331	DIPLsPPAQK	1	39358.7	38106.4	32729	1.59611	0.0326043
Q7Z460_S1091	CLASP1	sp|Q7Z460|CLAP1_HUMAN	Q7Z460	NSSNTSVGsPSNTIGR	0.9726	5643.99	6185.24	8794.79	0.683527	0.0327287
Q7L1Q6_S411	BZW1	sp|Q7L1Q6|5MP2_HUMAN	Q7L1Q6	NAEEEsEsEAEEGD	1	14224.3	28196.8	12838.7	6.82109	0.0328467
Q7L1Q6_S413	BZW1	sp|Q7L1Q6|5MP2_HUMAN	Q7L1Q6	NAEEEsEsEAEEGD	1	14224.3	28196.8	12838.7	6.82109	0.0328467
Q03164_S2201	KMT2A	sp|Q03164|KMT2A_HUMAN	Q03164	RHSTsSLsPQR;RHsTSSLsPQR	0.8948	25653.6	35663.9	19978.8	2.33481	0.03301
O95251_S56	KAT7	sp|O95251|KAT7_HUMAN	O95251	LSQSSQDsSPVR	0.9439	14772	18795.2	0	0.369915	0.0331072
Q7Z3J2_T685	VPS35L	sp|Q7Z3J2|VP35L_HUMAN	Q7Z3J2	LAMEtRK	1	21180.8	23073.7	22349	0.740053	0.0332305
Q8IZD4_S275	DCP1B	sp|Q8IZD4|DCP1B_HUMAN	Q8IZD4	SLsYEEPR	0.9732	13948	14373.4	14096.8	1.25188	0.0334067
Q0JRZ9_S403	FCHO2	sp|Q0JRZ9|FCHO2_HUMAN	Q0JRZ9	NLsNEELTK	0.9747	21329.5	23566.9	19299.2	1.24002	0.0336201
Q12888_S525	TP53BP1	sp|Q12888|TP53B_HUMAN	Q12888	LMLSTSEYsQsPK;LMLSTSEySQsPK	0.9683	4929.86	8455.86	9801.87	0.475714	0.033648
Q13586_S257	STIM1	sp|Q13586|STIM1_HUMAN	Q13586	AEQsLHDLQER	1	11267.3	11465.4	9261.76	1.38259	0.0341865
Q13185_S97	CBX3	sp|Q13185|CBX3_HUMAN	Q13185	RKsLSDsESDDSK;SLSDsESDDSK	0.9077	24725	0	6982.31	0.10787	0.0341874
P86790_S266	CCZ1B	sp|P86790|CCZ1B_HUMAN	P86790	HIEPELAGRDsPIR	1	14327.5	13621.8	15177.5	1.12006	0.0342282
P51812_S415	RPS6KA3	sp|P51812|KS6A3_HUMAN	P51812	NsIQFTDGYEVK	0.9761	7666.24	9257.85	6783.95	1.57991	0.0342865
P23588_S445	EIF4B	sp|P23588|IF4B_HUMAN	P23588	ESEKsLENETLNK;REsEKsLENETLNK;sLENETLNK	0.976	44254.6	69327.9	51609.3	1.77198	0.0343031
Q7Z3K3_S425	POGZ	sp|Q7Z3K3|POGZ_HUMAN	Q7Z3K3	SLDSEPSVPSAAKPPsPEK	0.9736	16640.8	11618.9	18015.6	0.698734	0.0343322
Q9Y6R4_S1252	MAP3K4	sp|Q9Y6R4|M3K4_HUMAN	Q9Y6R4	HSsPTEERDEPAYPR	0.96	15415.3	13180.3	15926.2	3.37451	0.0344302
O94888_S280	UBXN7	sp|O94888|UBXN7_HUMAN	O94888	SEsLIDASEDSQLEAAIR;SEsLIDASEDsQLEAAIR	0.9666	43128.1	58218.6	46615.2	1.46059	0.0345099
Q15154_S1730	PCM1	sp|Q15154|PCM1_HUMAN	Q15154	ILEDHGsPAGEIDDEDKDKDETETVK	0.9758	14507.3	12082.3	12627.5	0.829279	0.0346276
Q96HA7_S719	TONSL	sp|Q96HA7|TONSL_HUMAN	Q96HA7	VsPGQAAPAMAR	1	4304.97	3691.77	5882.95	0.593017	0.0346316
O95155_S84	UBE4B	sp|O95155|UBE4B_HUMAN	O95155	SQSSEGVSsLSSSPSNSLETQSQSLSR;SQSSEGVSsLSSsPSNSLETQSQSLSR	0.9679	11920.2	12653.7	7906.89	0.676597	0.0346639
Q5SRE5_S1709	NUP188	sp|Q5SRE5|NU188_HUMAN	Q5SRE5	GAPSsPATGVLPSPQGK	0.9565	5625.06	6652.3	8962.48	1.94528	0.0347207
Q9Y613_S523	FHOD1	sp|Q9Y613|FHOD1_HUMAN	Q9Y613	EPLIPAsPK	1	8597.28	8813.96	9166.7	1.25099	0.0350577
P15408_S200	FOSL2	sp|P15408|FOSL2_HUMAN	P15408	RsPPAPGLQPMR	1	3572.11	6260.2	6974.3	0.558413	0.0352122
Q99856_S119	ARID3A	sp|Q99856|ARI3A_HUMAN	Q99856	EGPGEEHFEDMAsDEDMKPK	1	5422.86	9845.23	12567.1	0.497635	0.0352317
P62753_S236	RPS6	sp|P62753|RS6_HUMAN	P62753	LSsLRASTsK;LSsLRASTsKSESSQK;LSsLRAStSK;LSsLRAStSKsESSQK;LSsLRAsTSK;LSsLRAsTSKSESSQK;LSsLRAsTSKsESSQK;LSsLRAsTsKSESSQK;LSsLRAstSKSESSQK;LssLRASTSKsESSQK;RLSsLRASTsK;RLSsLRAsTSK;RLssLRAStSK;RLssLRAsTSK	0.9738	2.64853e+06	2.68581e+06	1971595	1.51887	0.0353679
Q92538_S1319	GBF1	sp|Q92538|GBF1_HUMAN	Q92538	GYTsDSEVYTDHGR;GYTsDSEVYTDHGRPGK	0.9742	79140.6	88246.3	68835.1	1.34654	0.0356011
Q9UHW9_S1032	SLC12A6	sp|Q9UHW9|S12A6_HUMAN	Q9UHW9	LTSIGsDEDEETETYQEK	0.9675	7983.7	7397.06	6131.28	1.78549	0.0358344
Q04637_S1209	EIF4G1	sp|Q04637|IF4G1_HUMAN	Q04637	AAsLTEDR;AAsLTEDRDR;KAAsLTEDR;KAAsLTEDRDR	0.9763	58733.2	53160.5	55643.7	1.19553	0.0358958
Q5SW79_S667	CEP170	sp|Q5SW79|CE170_HUMAN	Q5SW79	VVTQRsEIGEK	0.925	4876.16	4327.95	6562.19	1.68798	0.0359363
O94776_S435	MTA2	sp|O94776|MTA2_HUMAN	O94776	GHLSRPEAQSLsPYTTSANR	0.9676	11824	15343.2	11930.3	0.71742	0.0359826
P98175_S797	RBM10	sp|P98175|RBM10_HUMAN	P98175	AHLsENELEALEK	1	4167.42	3963.97	3842.46	2.70066	0.036063
Q9UNS1_S1173	TIMELESS	sp|Q9UNS1|TIM_HUMAN	Q9UNS1	QLLDsDEEQEEDEGR	1	40603	46563.7	40867.6	0.838671	0.0361118
Q8TF01_S211	PNISR	sp|Q8TF01|PNISR_HUMAN	Q8TF01	QRsPIALPVK	1	8862.15	10041	11024.9	0.792306	0.0362049
O75822_S11	EIF3J	sp|O75822|EIF3J_HUMAN	O75822	AAAAAAAGDsDSWDADAFSVEDPVR;AAAAAAAGDsDSWDADAFSVEDPVRK	0.9605	16528	46756.9	24987.5	0.484457	0.0362581
Q9NY61_S203	AATF	sp|Q9NY61|AATF_HUMAN	Q9NY61	AGDRNsEDDGVVMTFSSVK	0.976	3923.42	4272.43	6465.91	0.492294	0.0364643
P33241_S252	LSP1	sp|P33241|LSP1_HUMAN	P33241	QAsIELPSMAVASTK	0.9766	92296.7	98071.1	120399	1.59255	0.0365558
Q9P2Y5_S498	UVRAG	sp|Q9P2Y5|UVRAG_HUMAN	Q9P2Y5	QSSIFGGADVGFSGGIPsPDK	0.9662	1720.24	2625.22	2370.72	4.51639	0.0365942
Q08211_T787	DHX9	sp|Q08211|DHX9_HUMAN	Q08211	LEtHMTPEMFR	0.9635	69505.7	91110.2	57451.7	0.616321	0.0366578
Q14738_S88	PPP2R5D	sp|Q14738|2A5D_HUMAN	Q14738	QssSRFNLSK;RQssSRFNLSK	0.9608	49153.7	45615	20729.4	0.574911	0.0368145
Q9H6U6_S900	BCAS3	sp|Q9H6U6|BCAS3_HUMAN	Q9H6U6	EGSIETLSNSSGSTSGsIPR	0.8563	9380.66	9189.56	8081.88	2.5888	0.0368867
O14497_S1604	ARID1A	sp|O14497|ARI1A_HUMAN	O14497	TSPSKsPFLHSGMK;TsPSKsPFLHSGMK	0.8439	7226.24	16142.7	0	0.350523	0.0369397
P38398_S403	BRCA1	sp|P38398|BRCA1_HUMAN	P38398	SDELLGsDDSHDGEsESNAK	0.9243	6905.43	0	0	0.207957	0.0370236
Q8WYQ5_S271	DGCR8	sp|Q8WYQ5|DGCR8_HUMAN	Q8WYQ5	YGGDsDHPsDGETSVQPMMTK	0.969	4084.08	3426.62	6885.92	0.466371	0.037397
Q8WYQ5_S275	DGCR8	sp|Q8WYQ5|DGCR8_HUMAN	Q8WYQ5	YGGDsDHPsDGETSVQPMMTK	0.9697	4084.08	3426.62	6885.92	0.466371	0.037397
Q9UKS7_S78	IKZF2	sp|Q9UKS7|IKZF2_HUMAN	Q9UKS7	GHDEGsSLEEPLIESSEVADNR	0.9649	7588.91	9610.13	3791.23	5.14512	0.0375517
P46013_S374	MKI67	sp|P46013|KI67_HUMAN	P46013	REsVNLGK	1	18886.5	22520.9	24580.8	1.30869	0.0377779
O60832_S451	DKC1	sp|O60832|DKC1_HUMAN	O60832	KREsESEsDETPPAAPQLIK;KREsEsESDETPPAAPQLIK	0.9691	43498.3	61367.3	16399.6	0.47685	0.0379215
Q05084_T409	ICA1	sp|Q05084|ICA69_HUMAN	Q05084	EPVPtMALGEPDPK	1	4608.22	1373.46	0	0.320533	0.038176
P78549_S22	NTHL1	sp|P78549|NTH_HUMAN	P78549	sLGPGAGPR	1	6495.56	7975.14	5893.25	1.96428	0.0381823
Q92619_S25	ARHGAP45	sp|Q92619|HMHA1_HUMAN	Q92619	AGsPsPQPSGELPR	0.9738	0	0	0	0	0.0382865
P78559_S2022	MAP1A	sp|P78559|MAP1A_HUMAN	P78559	ELSSPIsPK;ELSsPIsPK;ELsSPIsPK	0.9756	20677.2	24464	22565.5	1.35814	0.0383037
Q13459_S1405	MYO9B	sp|Q13459|MYO9B_HUMAN	Q13459	KKPGDASSLPDAGLsPGSQVDSK	0.9719	6992.4	6926.78	6344.16	2.56747	0.038314
Q92619_S578	ARHGAP45	sp|Q92619|HMHA1_HUMAN	Q92619	KSsFNVSDVAR	0.9668	12566.9	13601.2	11485.2	4.10222	0.0383207
P46379_S1117	BAG6	sp|P46379|BAG6_HUMAN	P46379	LQEDPNYsPQR	0.9712	8469.47	9211.06	9504.47	0.682093	0.0384009
Q9P2K3_S171	RCOR3	sp|Q9P2K3|RCOR3_HUMAN	Q9P2K3	HNQGDsDDDVEETHPMDGNDsDYDPK;HNQGDsDDDVEETHPMDGNDsDYDPKK	0.9521	33829.4	41466.3	33627.3	0.793939	0.0386492
Q15773_S238	MLF2	sp|Q15773|MLF2_HUMAN	Q15773	LAIQGPEDsPSR	0.9228	22770.2	20263.6	21451.5	0.893978	0.0386742
O75533_T235	SF3B1	sp|O75533|SF3B1_HUMAN	O75533	WDEtPGR	1	11737	12104.5	13345.1	0.880286	0.038717
P34910_S294	EVI2B	sp|P34910|EVI2B_HUMAN	P34910	LFEsSENIEDSNNPK	0.9733	14116.3	14258.1	13779.1	0.795154	0.0387944
Q9Y2X7_Y383	GIT1	sp|Q9Y2X7|GIT1_HUMAN	Q9Y2X7	SQSDLDDQHDyDSVAsDEDTDQEPLR	0.8796	24358.6	13906.3	11581.5	0.407339	0.0388042
Q8NB49_S445	ATP11C	sp|Q8NB49|AT11C_HUMAN	Q8NB49	GVTQEVDGLsQTDGTLTYFDK	0.9694	5567.34	7882.64	5541.84	4.44282	0.0390296
P28749_S1041	RBL1	sp|P28749|RBL1_HUMAN	P28749	VIAIDSDAEsPAK;VIAIDSDAEsPAKR;VIAIDsDAEsPAKR	1	13665.3	12763.8	14286.1	0.745114	0.039507
O15117_S457	FYB1	sp|O15117|FYB1_HUMAN	O15117	SPVNEDNQDGVTHSDGAGNLDEEQDsEGETYEDIEASK	0.9558	37781.4	48411.7	46788.1	0.791605	0.0398284
Q99490_S927	AGAP2	sp|Q99490|AGAP2_HUMAN	Q99490	TDsQSEAVAIQAIR	0.9291	0	3368.59	0	0.247686	0.0401003
O15047_S464	SETD1A	sp|O15047|SET1A_HUMAN	O15047	TsPRPAsPAR;tSPRPAsPAR	0.9348	70169.6	86689.1	66931.3	1.58005	0.0402093
Q86YV0_S859	RASAL3	sp|Q86YV0|RASL3_HUMAN	Q86YV0	DSAsLPR	0.969	17450.7	20061.7	16039.2	0.588211	0.0402161
Q15648_S1207	MED1	sp|Q15648|MED1_HUMAN	Q15648	LAsPMKPVPGtPPSSK	0.9723	3553.6	7423.3	6339.64	0.508248	0.040333
Q15648_T1215	MED1	sp|Q15648|MED1_HUMAN	Q15648	LAsPMKPVPGtPPSSK	0.9728	3553.6	7423.3	6339.64	0.508248	0.040333
Q4KMP7_S678	TBC1D10B	sp|Q4KMP7|TB10B_HUMAN	Q4KMP7	AAGGAPsPPPPVR	1	15608.7	11437.9	16516	1.52326	0.0405076
Q9UQ35_S2581	SRRM2	sp|Q9UQ35|SRRM2_HUMAN	Q9UQ35	RVPsPTPAPK;VPsPTPAPK	0.9751	63684.5	62307.6	70268.8	1.15161	0.0405869
P36915_T50	GNL1	sp|P36915|GNL1_HUMAN	P36915	EEQTDtSDGESVTHHIR;REEQtDtSDGESVTHHIR	0.9507	44144.9	44575.9	15649.3	6.73792	0.0406261
P23769_S182	GATA2	sp|P23769|GATA2_HUMAN	P23769	EVsPDPSTTGAAsPASSSAGGSAAR	0.9575	0	0	0	0	0.0407443
P23769_S192	GATA2	sp|P23769|GATA2_HUMAN	P23769	EVsPDPSTTGAAsPASSSAGGSAAR	0.9567	0	0	0	0	0.0407443
Q86YV0_S857	RASAL3	sp|Q86YV0|RASL3_HUMAN	Q86YV0	DsASLPR	0.9766	43661.3	45898.8	39165.4	1.44358	0.0408875
Q15942_S344	ZYX	sp|Q15942|ZYX_HUMAN	Q15942	sPGAPGPLTLK	0.9769	49417	61797.7	60028.8	1.35028	0.0409969
P11388_S1377	TOP2A	sp|P11388|TOP2A_HUMAN	P11388	SVVsDLEADDVK	0.9764	39497.8	43591.8	34932.3	1.2896	0.0410468
P51610_S666	HCFC1	sp|P51610|HCFC1_HUMAN	P51610	sPISVPGGSALISNLGK	0.9736	4870.77	9377.11	6135.24	2.42714	0.0413326
Q14671_S709	PUM1	sp|Q14671|PUM1_HUMAN	Q14671	DsLTGSSDLYK;RDsLTGSSDLYK	0.9744	47524.1	54974.6	49163.5	1.21042	0.0414671
P46100_S729	ATRX	sp|P46100|ATRX_HUMAN	P46100	QSETVDQNsDSDEMLAILK	0.9662	3846.7	5743.71	8025.74	0.602325	0.0417835
Q14680_S356	MELK	sp|Q14680|MELK_HUMAN	Q14680	SNNWsLEDVTASDK	0.973	2285.72	3880.19	4385.15	0.637735	0.0418252
Q9UEW8_S385	STK39	sp|Q9UEW8|STK39_HUMAN	Q9UEW8	TEDGDWEWsDDEMDEK	0.9763	16497.5	25668.4	23365.4	0.682867	0.0418263
P27361_T202	MAPK3	sp|P27361|MK03_HUMAN	P27361	IADPEHDHTGFLtEyVATR	0.9677	5920.09	12121.5	3879.51	#DIV/0!	0.042034
Q03164_S2196	KMT2A	sp|Q03164|KMT2A_HUMAN	Q03164	RHsTSSLsPQR	0.7826	24273.4	33745.1	18903.9	3.24787	0.0421397
Q9GZR7_S295	DDX24	sp|Q9GZR7|DDX24_HUMAN	Q9GZR7	SPGKAEAEsDALPDDTVIESEALPSDIAAEAR	0.9511	0	0	6030.16	0.232829	0.0425014
Q9NU22_S5015	MDN1	sp|Q9NU22|MDN1_HUMAN	Q9NU22	DKEADEEGGENGPADQGFQPQEEEEREDsDTEEQVPEALER	0.9146	6819.63	13593.5	8941.83	5.34912	0.0426027
Q14676_S495	MDC1	sp|Q14676|MDC1_HUMAN	Q14676	DQPPFGDsDDsVEADK	1	14815.6	25140.7	9595.44	0.53635	0.0432138
Q14676_S498	MDC1	sp|Q14676|MDC1_HUMAN	Q14676	DQPPFGDsDDsVEADK	1	14815.6	25140.7	9595.44	0.53635	0.0432138
Q14738_S89	PPP2R5D	sp|Q14738|2A5D_HUMAN	Q14738	QSssRFNLSK;QssSRFNLSK;RQssSRFNLSK	0.9608	69365	64371.2	29253.1	0.592175	0.043276
Q9Y3T9_S672	NOC2L	sp|Q9Y3T9|NOC2L_HUMAN	Q9Y3T9	DLFDLNsSEEDDTEGFSER	0.9697	34076.2	58457.3	32510.4	2.45641	0.043343
Q9UHW9_S32	SLC12A6	sp|Q9UHW9|S12A6_HUMAN	Q9UHW9	IDDIPGLSDTsPDLSSR	0.9664	0	0	10948.5	0.245713	0.0434452
P18887_S266	XRCC1	sp|P18887|XRCC1_HUMAN	P18887	KtPSKPPAQLsPSVPK;PPAQLsPsVPKRPK	1	18552.4	16559.2	11812.6	0.624825	0.0435981
P22670_S123	RFX1	sp|P22670|RFX1_HUMAN	P22670	ASETVSEASPGsTASQTGVPTQVVQQVQGTQQR	0.9441	1729.82	2842.07	2360.25	0.586313	0.0436108
Q9BRD0_S222	BUD13	sp|Q9BRD0|BUD13_HUMAN	Q9BRD0	VRHDsPDPsPPR;VRHDsPDPsPPRR	1	20182.8	20861	18232.6	0.827564	0.0438697
Q9BRD0_S226	BUD13	sp|Q9BRD0|BUD13_HUMAN	Q9BRD0	VRHDsPDPsPPR;VRHDsPDPsPPRR	1	20182.8	20861	18232.6	0.827564	0.0438697
P12956_S27	XRCC6	sp|P12956|XRCC6_HUMAN	P12956	TEGDEEAEEEQEENLEAsGDYK	0.9572	0	5986.36	4928.84	0.380109	0.0439258
Q13595_T204	TRA2A	sp|Q13595|TRA2A_HUMAN	Q13595	AHTPtPGIYMGR	0.929	12437.2	7069.24	19493.8	6.18236	0.0439814
Q08495_S26	DMTN	sp|Q08495|DEMA_HUMAN	Q08495	DSSVPGsPSSIVAK	0.9733	12268	16900.7	16752	1.41089	0.0441402
O15021_S353	MAST4	sp|O15021|MAST4_HUMAN	O15021	sRSLsPGR;sRsLSPGR	0.9384	207730	246596	122972	4.98976	0.044215
Q96ST2_S415	IWS1	sp|Q96ST2|IWS1_HUMAN	Q96ST2	VVsDADDsDSDAVSDK	0.9664	14452.9	15674.2	10473.4	1.59364	0.0446213
Q96ST2_S420	IWS1	sp|Q96ST2|IWS1_HUMAN	Q96ST2	VVsDADDsDSDAVSDK	0.9661	14452.9	15674.2	10473.4	1.59364	0.0446213
Q14669_S1317	TRIP12	sp|Q14669|TRIPC_HUMAN	Q14669	VREDDEDsDDDGsDEEIDESLAAQFLNSGNVR	0.9191	0	0	0	0	0.0447906
Q14669_S1322	TRIP12	sp|Q14669|TRIPC_HUMAN	Q14669	VREDDEDsDDDGsDEEIDESLAAQFLNSGNVR	0.9191	0	0	0	0	0.0447906
O94804_S438	STK10	sp|O94804|STK10_HUMAN	O94804	QVAEQGGDLsPAANR	1	82009.8	89301.4	109090	0.683395	0.0447966
Q9UQ35_T1856	SRRM2	sp|Q9UQ35|SRRM2_HUMAN	Q9UQ35	SRtsPAPWK;sRtSPAPWK	0.9597	160374	201201	186021	0.792853	0.0448859
Q9H4L7_S37	SMARCAD1	sp|Q9H4L7|SMRCD_HUMAN	Q9H4L7	IEEAPEATPQPSQPGPSSPIsLsAEEENAEGEVSR	0.7611	0	0	0	0	0.0448927
P10412_S36	H1-4	sp|P10412|H14_HUMAN	P10412	AsGPPVSELITK;KAsGPPVSELITK	0.9765	129367	137227	128700	1.13649	0.0452618
P42566_S796	EPS15	sp|P42566|EPS15_HUMAN	P42566	LDsPDPFK;SINKLDsPDPFK;sINKLDsPDPFK	1	32709.2	37138.6	31435.1	1.205	0.0453103
Q02880_S1461	TOP2B	sp|Q02880|TOP2B_HUMAN	Q02880	SEDDsAKFDsNEEDSASVFSPSFGLK	0.9647	11819.6	20134.8	10926.5	0.572385	0.0454829
Q5T4S7_S2719	UBR4	sp|Q5T4S7|UBR4_HUMAN	Q5T4S7	HVTLPSsPR;HVtLPSsPR	0.9471	59527.1	64471.1	65049.9	3.88403	0.04559
Q92597_S330	NDRG1	sp|Q92597|NDRG1_HUMAN	Q92597	SRtAsGSSVTSLDGTR;TAsGSSVTSLDGTR;TAsGSSVTsLDGTR;TAsGSsVTSLDGTR;sRTAsGSSVTSLDGTR	0.9748	40896	40733.6	33403.5	1.27309	0.0459501
O00264_S181	PGRMC1	sp|O00264|PGRC1_HUMAN	O00264	EGEEPTVYsDEEEPK;EGEEPTVYsDEEEPKDESAR	0.9752	188543	172264	204621	1.20779	0.0459549
Q8TDB6_S532	DTX3L	sp|Q8TDB6|DTX3L_HUMAN	Q8TDB6	EGHETPMDIDsDDSK;LKEGHETPMDIDsDDSK	0.9731	18143.6	25131.7	23396.8	0.773723	0.0461715
Q96C57_S179	CUSTOS	sp|Q96C57|CSTOS_HUMAN	Q96C57	EAAVSASDILQESAIHsPGTVEK	0.9683	8030.13	0	0	0.246771	0.0461861
P23588_S597	EIF4B	sp|P23588|IF4B_HUMAN	P23588	YAALsVDGEDENEGEDYAE	0.9747	48070.4	58145.9	43567.7	1.45225	0.0462878
Q2NKX8_S1028	ERCC6L	sp|Q2NKX8|ERC6L_HUMAN	Q2NKX8	IVsDGEDEDDSFK	0.9714	3085.81	0	0	0.256083	0.0463408
P16150_S363	SPN	sp|P16150|LEUK_HUMAN	P16150	QGsLAMEELKsGSGPSLK;sGSGPSLKGEEEPLVASEDGAVDAPAPDEPEGGDGAAP	0.9672	125934	155192	132373	0.81628	0.0463633
P16220_S257	CREB1	sp|P16220|CREB1_HUMAN	P16220	TAPTSTIAPGVVMASsPALPTQPAEEAAR	0.8518	0	0	1144.84	0.170197	0.0466178
P05388_S304	RPLP0	sp|P05388|RLA0_HUMAN	P05388	EEsEEsDEDMGFGLFD;VEAKEEsEESDEDMGFGLFD;VEAKEEsEEsDEDMGFGLFD	1	488918	815194	550558	0.617712	0.0468297
P38432_S566	COIL	sp|P38432|COIL_HUMAN	P38432	LIIEsPSNTSSTEPA;LIIEsPSNtSSTEPA	0.9604	8837.16	10920.3	12019.7	0.727029	0.0468399
P35658_S430	NUP214	sp|P35658|NU214_HUMAN	P35658	sPGSTPTtPTSSQAPQK	0.9584	210209	268946	228604	1.27594	0.0469097
Q4LE39_S776	ARID4B	sp|Q4LE39|ARI4B_HUMAN	Q4LE39	VHADLVISKPVsKSPER	0.8746	2495.22	0	4523.55	0.386694	0.0470454
Q96JM3_S445	CHAMP1	sp|Q96JM3|CHAP1_HUMAN	Q96JM3	KPSGsPDLWK;KPSGsPDLWKLsPDQR	0.957	21170.7	27420.7	40415	0.637852	0.0471154
Q92766_S1174	RREB1	sp|Q92766|RREB1_HUMAN	Q92766	ANsGGVDLDsSGEFASIEK	0.9057	15683	15846.8	13965.6	1.58732	0.0472215
Q13610_S57	PWP1	sp|Q13610|PWP1_HUMAN	Q13610	EKLQEEGGGsDEEETGsPSEDGMQSAR	0.9699	15014.5	10821.8	13202.9	0.691585	0.0477753
O60293_S352	ZFC3H1	sp|O60293|ZC3H1_HUMAN	O60293	RIsTSDILSEK	0.9497	8716.33	8257.45	9561.28	2.49031	0.0479589
P26583_S42	HMGB2	sp|P26583|HMGB2_HUMAN	P26583	HPDSSVNFAEFsKK	0.9655	21692.3	13923.4	16227.9	1.60323	0.0480995
P35658_S433	NUP214	sp|P35658|NU214_HUMAN	P35658	SPGsTPTTPTSSQAPQK;SPGsTPTtPTSSQAPQK	0.9684	209768	270642	229778	1.29398	0.0481673
Q9Y485_S1970	DMXL1	sp|Q9Y485|DMXL1_HUMAN	Q9Y485	WDsDNDEENEDVPISMK	0.9755	4625.7	11983.9	11944.5	0.572557	0.0482924
Q96FV9_S560	THOC1	sp|Q96FV9|THOC1_HUMAN	Q96FV9	TGEDEDEEDNDALLKENEsPDVR	0.9756	12283	11435.3	13645.3	0.784945	0.0484831
P33241_S189	LSP1	sp|P33241|LSP1_HUMAN	P33241	TPSPLVLEGTIEQSsPPLSPTTK;TPSPLVLEGTIEQSsPPLsPTTK;TPsPLVLEGTIEQSsPPLSPTTK;tPSPLVLEGTIEQSsPPLSPTTK	0.9713	5720.79	10883.9	5036.74	0.430612	0.0484945
P07910_S253	HNRNPC	sp|P07910|HNRPC_HUMAN	P07910	MEsEGGADDSAEEGDLLDDDDNEDRGDDQLELIKDDEK;MEsEGGADDsAEEGDLLDDDDNEDR;MEsEGGADDsAEEGDLLDDDDNEDRGDDQLELIK;MEsEGGADDsAEEGDLLDDDDNEDRGDDQLELIKDDEK	1	120567	185112	94029.1	0.521053	0.0485342
Q5TBA9_S2507	FRY	sp|Q5TBA9|FRY_HUMAN	Q5TBA9	QLSGsTPsLNK	0.9435	0	7644.23	0	0.223758	0.0488415
Q5TBA9_S2510	FRY	sp|Q5TBA9|FRY_HUMAN	Q5TBA9	QLSGsTPsLNK	0.9441	0	7644.23	0	0.223758	0.0488415
O43399_S166	TPD52L2	sp|O43399|TPD54_HUMAN	O43399	NSATFKsFEDR;NsATFKsFEDR	0.9744	109403	61166.8	76831.5	0.658921	0.0488626
Q9NYF8_S397	BCLAF1	sp|Q9NYF8|BCLF1_HUMAN	Q9NYF8	FNDsEGDDTEETEDYR;FNDsEGDDtEETEDYR;QKFNDsEGDDTEETEDYR	0.9761	237457	271304	254195	1.14371	0.0491298
P78362_S494	SRPK2	sp|P78362|SRPK2_HUMAN	P78362	TVsASsTGDLPK;TVsAsSTGDLPK	0.9696	67304.6	74430.4	59068.8	1.2331	0.0495453
Q9Y6X9_S743	MORC2	sp|Q9Y6X9|MORC2_HUMAN	Q9Y6X9	KRsVAVsDEEEVEEEAER;RsVAVsDEEEVEEEAER;SVAVsDEEEVEEEAER;sVAVsDEEEVEEEAER	1	37567	39474.6	29049.9	1.41366	0.0495762
P23511_S326	NFYA	sp|P23511|NFYA_HUMAN	P23511	EKDsPHMQDPNQADEEAMTQIIR	0.9702	0	1368.54	1850.95	0.322841	0.0496148
Q16539_Y182	MAPK14	sp|Q16539|MK14_HUMAN	Q16539	HTDDEMTGyVATR;HTDDEMtGyVATR	0.9762	59173.9	93451.4	73337.2	1.63675	0.0499968

## Sheet: DEPs FTVI-Esel group
Index	Gene	Protein	Protein ID	Peptide	Best Localization Probability	4_1 MaxLFQ Intensity	4_2 MaxLFQ Intensity	4_3 MaxLFQ Intensity	ratio4/1	pValue4/1
Q92538_S1780	GBF1	sp|Q92538|GBF1_HUMAN	Q92538	AASsSSPGsPVASSPSR	0.8385	0	0	0	0	6.29849e-06
Q9UQ35_S1110	SRRM2	sp|Q9UQ35|SRRM2_HUMAN	Q9UQ35	SSsPVTELAsRSPIR	0.8873	0	0	0	0	6.39794e-06				204 elements included exclusively in "FTVI-ESL/UNT":
Q13029_S747	PRDM2	sp|Q13029|PRDM2_HUMAN	Q13029	TSsPPSsPQHsPALR	0.9392	0	0	0	0	8.95466e-06				HPS4	Q9NQG7
P27708_S1407	CAD	sp|P27708|PYR1_HUMAN	P27708	RLSsFVTK	0.9575	0	0	0	0	3.31133e-05				SLC16A2	P36021
Q9NQG7_S355	HPS4	sp|Q9NQG7|HPS4_HUMAN	Q9NQG7	GEVLGLSSsLGK	0.9532	9099.97	9878.61	10917.3	#DIV/0!	4.58643e-05				SRSF10	O75494
P36021_S8	SLC16A2	sp|P36021|MOT8_HUMAN	P36021	ALQSQAsEEAK	0.9635	4658.06	4967.38	4069.41	#DIV/0!	6.50279e-05				CTPS1	P17812
Q8WYP5_S1232	AHCTF1	sp|Q8WYP5|ELYS_HUMAN	Q8WYP5	ETRIsFVEEDVHPK;IsFVEEDVHPK	1	12690.1	13120.3	14228.1	2.29668	0.000102975				PACS1	Q6VY07
Q9UK61_S673	TASOR	sp|Q9UK61|TASOR_HUMAN	Q9UK61	SSHsLDYDKDR	0.9623	10515.6	10050.2	9104.9	3.22814	0.000136428				UBE2O	Q9C0C9
Q9Y580_S204	RBM7	sp|Q9Y580|RBM7_HUMAN	Q9Y580	MNsYPYLADR	0.9687	10340.4	12301.7	11785.5	4.34239	0.000157619				WDR20	Q8TBZ3
O75494_S253	SRSF10	sp|O75494|SRS10_HUMAN	O75494	SRsWTsPK	0.9504	52757.3	55994.7	43548.6	#DIV/0!	0.000168406				NKTR	P30414
Q9UBM7_S14	DHCR7	sp|Q9UBM7|DHCR7_HUMAN	Q9UBM7	AKsLDGVTNDR;sLDGVTNDR	0.9766	33358.8	32314.1	34810.2	1.96888	0.000172585				SLC20A2	Q08357
P17812_S571	CTPS1	sp|P17812|PYRG1_HUMAN	P17812	DTYSDRsGSSsPDSEITELK;sGSSsPDSEITELK	0.9728	62926.8	69603.4	68468.2	0.62902	0.000188381				INPP5D	Q92835
Q6VY07_S529	PACS1	sp|Q6VY07|PACS1_HUMAN	Q6VY07	TNSsDSERsPDLGHSTQIPR	0.9527	0	0	0	0	0.000188853				PAK2	Q13177
Q13586_S660	STIM1	sp|Q13586|STIM1_HUMAN	Q13586	AVAEEDNGsIGEETDSSPGR	0.7546	9012.05	9259.15	7182.59	#DIV/0!	0.000204773				RBL2	Q08999
Q9C0C9_S515	UBE2O	sp|Q9C0C9|UBE2O_HUMAN	Q9C0C9	KKsIPLSIK;sIPLSIK	0.9352	9819.45	9704.44	10169.9	1.81092	0.000206117				SMARCA4	P51532
Q8NFC6_S637	BOD1L1	sp|Q8NFC6|BD1L1_HUMAN	Q8NFC6	RLSEsLHVVDENKNESK	0.8712	0	0	0	0	0.000292163				R3HDM1	Q15032
Q7LBC6_S798	KDM3B	sp|Q7LBC6|KDM3B_HUMAN	Q7LBC6	RFsLDER	1	24341.9	20175.5	20275.2	3.54351	0.000350269				UQCRB	P14927
P52732_T926	KIF11	sp|P52732|KIF11_HUMAN	P52732	LDIPTGTtPQR	0.9531	0	0	0	0	0.000352083				PPFIA1	Q13136
Q3KQU3_S125	MAP7D1	sp|Q3KQU3|MA7D1_HUMAN	Q3KQU3	RSSQPSPTAVPASDsPPTK;SSQPsPTAVPASDsPPTK	0.9594	15322.5	13164.3	15465.5	0.616345	0.000372148				TCF20	Q9UGU0
O95071_S2486	UBR5	sp|O95071|UBR5_HUMAN	O95071	sVVDMDLDDTDDGDDNAPLFYQPGK	0.9685	0	0	0	0	0.000442083				DDX41	Q9UJV9
O95453_S557	PARN	sp|O95453|PARN_HUMAN	O95453	NNsFTAPSTVGK	0.9759	56809.4	56591.3	52206.2	2.13509	0.000452197				ADRM1	Q16186
Q8TBZ3_S432	WDR20	sp|Q8TBZ3|WDR20_HUMAN	Q8TBZ3	sNSLPHSAVSNAGSK	0.9583	6039.89	6051.14	5555.39	1.48187	0.00046052				PFAS	O15067
P30414_S463	NKTR	sp|P30414|NKTR_HUMAN	P30414	ILIPsDIESSK	0.9676	12626.6	12438.2	13035.6	1.63278	0.000463719				CCDC88B	A6NC98
Q08357_S256	SLC20A2	sp|Q08357|S20A2_HUMAN	Q08357	EGALSRVsDESLsK;EGALSRVsDEsLSK	0.9685	9552.94	10104.7	10763.1	0.725718	0.000491429				VDAC1	P21796
Q08357_S259	SLC20A2	sp|Q08357|S20A2_HUMAN	Q08357	EGALSRVsDEsLSK	0.9683	9559.54	10111.7	10770.5	0.725718	0.00049143				HIRIP3	Q9BW71
Q9NXV6_S131	CDKN2AIP	sp|Q9NXV6|CARF_HUMAN	Q9NXV6	GIsSSNEGVEEPSK	0.9747	17002.1	14900.6	17959	3.13312	0.000551394				EEF2	P13639
Q09666_T3716	AHNAK	sp|Q09666|AHNK_HUMAN	Q09666	VDIDtPDINIEGSEGK	0.9754	14976.5	13147.1	14643.6	1.75681	0.000554025				DCUN1D5	Q9BTE7
Q9Y4A5_S2077	TRRAP	sp|Q9Y4A5|TRRAP_HUMAN	Q9Y4A5	SQsLPGADSLLAK;SQsLPGADSLLAKPIDK	0.9734	20403.5	24787.7	25090.8	2.90841	0.000577917				SYMPK	Q92797
Q53SF7_T260	COBLL1	sp|Q53SF7|COBL1_HUMAN	Q53SF7	DQTAsAPAtPLVNK	0.975	2772.57	5843.14	4127.43	0.320903	0.000601351				INTS1	Q8N201
Q92835_Y865	INPP5D	sp|Q92835|SHIP1_HUMAN	Q92835	EKLyDFVK	1	28366.4	27957.6	24697.5	2.16255	0.000602476				DNAJC6	O75061
P04792_S15	HSPB1	sp|P04792|HSPB1_HUMAN	P04792	GPsWDPFR	1	17543.3	21336	15651.4	15.5911	0.000664655				LIMA1	Q9UHB6
Q13177_S58	PAK2	sp|Q13177|PAK2_HUMAN	Q13177	IISIFsGTEK	0.9598	11268	8480.21	10144	17.8701	0.000666791				SSR3	Q9UNL2
Q15022_S541	SUZ12	sp|Q15022|SUZ12_HUMAN	Q15022	ASMsEFLEsEDGEVEQQR	0.9312	0	0	0	0	0.00068747				MOB1B	Q7L9L4
Q5SW79_S881	CEP170	sp|Q5SW79|CE170_HUMAN	Q5SW79	SEsLDPDSSMDTTLILK	0.9725	12772.1	13195.1	12467.5	1.52432	0.000728302				DDX10	Q13206
O75122_S360	CLASP2	sp|O75122|CLAP2_HUMAN	O75122	ASsLPGsLQR	0.8203	4351.95	3652.44	5472.64	0.248565	0.000740463				PIGB	Q92521
O75122_S364	CLASP2	sp|O75122|CLAP2_HUMAN	O75122	ASsLPGsLQR	0.8239	4351.95	3652.44	5472.64	0.248565	0.000740463				HACD3	Q9P035
Q96AT1_S146	KIAA1143	sp|Q96AT1|K1143_HUMAN	Q96AT1	NSSLLsFDNEDENE	0.9753	51946.6	51161.6	60862.7	2.33394	0.000750056				ARHGEF18	Q6ZSZ5
Q9UKX7_S221	NUP50	sp|Q9UKX7|NUP50_HUMAN	Q9UKX7	VAAETQsPSLFGSTK	0.9732	12229.2	10937.8	12716.1	3.06685	0.000817365				SRSF8	Q9BRL6
Q5JQS6_T35	GCSAML	sp|Q5JQS6|GSAML_HUMAN	Q5JQS6	QEMTtFER	0.9502	0	0	0	0	0.000848				PA2G4	Q9UQ80
Q14676_S485	MDC1	sp|Q14676|MDC1_HUMAN	Q14676	AHsEKDQPPFGDSDDSVEADK	0.9738	13157.4	13452.9	10893.5	2.41757	0.000849504				DCAF6	Q58WW2
Q8IWB9_S270	TEX2	sp|Q8IWB9|TEX2_HUMAN	Q8IWB9	TAPSSPLTsPSDTR;TAPSsPLTsPSDTR	0.9503	13439.4	14603.4	11062.8	3.64948	0.000874635				DPYSL2	Q16555
Q08999_S688	RBL2	sp|Q08999|RBL2_HUMAN	Q08999	LFVENDsPSDGGtPGR	0.9499	0	0	2397.14	0.0799547	0.000924172				SLX4	Q8IY92
Q08999_T694	RBL2	sp|Q08999|RBL2_HUMAN	Q08999	LFVENDsPSDGGtPGR	0.9502	0	0	2397.14	0.0799547	0.000924172				CLINT1	Q14677
P51532_S699	SMARCA4	sp|P51532|SMCA4_HUMAN	P51532	KIPDPDsDDVsEVDAR	1	4870.66	4046.28	4978.69	0.501294	0.000973641				TCF12	Q99081
Q5T200_S207	ZC3H13	sp|Q5T200|ZC3HD_HUMAN	Q5T200	SKLsPSPSLR;SKLsPSPsLR;SKLsPsPSLR;SKLsPsPSLRK	0.975	90249.4	92677.1	93617.1	0.751848	0.000978735				HSP90AB1	P08238
Q15032_S262	R3HDM1	sp|Q15032|R3HD1_HUMAN	Q15032	DNSsFDKDDNQMR	0.9602	15694.9	16205.6	11005.3	#DIV/0!	0.00098595				NOTCH2	Q04721
Q9H2G2_S779	SLK	sp|Q9H2G2|SLK_HUMAN	Q9H2G2	DSGsISLQETR	0.9742	31214.2	35679.6	26662	0.580316	0.00100789				ELF1	P32519
Q9NSK0_S565	KLC4	sp|Q9NSK0|KLC4_HUMAN	Q9NSK0	RsSELLVR	0.9507	6265.18	6969.18	9161.03	#DIV/0!	0.00102209				CDK17	Q00537
O94804_S514	STK10	sp|O94804|STK10_HUMAN	O94804	EMGsLSIKDPK	0.9724	25315.8	30349.8	20915.1	0.496776	0.00106864				PLCB2	Q00722
Q7Z4H7_T584	HAUS6	sp|Q7Z4H7|HAUS6_HUMAN	Q7Z4H7	tPENLITEIR	0.9765	11160	11290.6	10105.1	3.59066	0.00108149				TFAM	Q00059
O95251_S56	KAT7	sp|O95251|KAT7_HUMAN	O95251	LSQSSQDsSPVR	0.9439	10871.1	12755.7	15046.3	0.426183	0.00117796				ZRANB2	O95218
Q14160_T475	SCRIB	sp|Q14160|SCRIB_HUMAN	Q14160	RAtPHPSELK	0.9657	4463.18	4624.17	3503.19	0.496171	0.00122559				RANBP2	P49792
P14927_S10	UQCRB	sp|P14927|QCR7_HUMAN	P14927	MAGKQAVsAsGK	1	8129.12	7688.37	6842.88	1.73413	0.00124076				MTRES1	Q9P0P8
P14927_S8	UQCRB	sp|P14927|QCR7_HUMAN	P14927	MAGKQAVsAsGK	1	8129.12	7688.37	6842.88	1.73413	0.00124076				MCM3	P25205
O75081_S459	CBFA2T3	sp|O75081|MTG16_HUMAN	O75081	SSsAGPEGPQLDVPR	0.9675	35720.8	40501.3	39092.3	1.57286	0.00125288				ACAP1	Q15027
Q13136_S239	PPFIA1	sp|Q13136|LIPA1_HUMAN	Q13136	SsDGsLSHEEDLAK	0.8374	4637.98	4111.32	4285.56	0.608461	0.00127308				BOP1	Q14137
Q13136_S242	PPFIA1	sp|Q13136|LIPA1_HUMAN	Q13136	SsDGsLSHEEDLAK	0.8377	4637.98	4111.32	4285.56	0.608461	0.00127308				RALY	Q9UKM9
Q9Y2W1_S575	THRAP3	sp|Q9Y2W1|TR150_HUMAN	Q9Y2W1	MDsFDEDLAR	1	26870.9	24750.2	21098.2	2.28614	0.00129408				PAN3	Q58A45
Q14676_S495	MDC1	sp|Q14676|MDC1_HUMAN	Q14676	DQPPFGDsDDsVEADK	1	9169.58	14750.7	10728.8	0.375044	0.00133014				FNBP1	Q96RU3
Q14676_S498	MDC1	sp|Q14676|MDC1_HUMAN	Q14676	DQPPFGDsDDsVEADK	1	9169.58	14750.7	10728.8	0.375044	0.00133014				PRPF40A	O75400
Q9UGU0_S1005	TCF20	sp|Q9UGU0|TCF20_HUMAN	Q9UGU0	GRsPSQYHDFAEK	0.9678	4074.48	4500.18	4385.01	0.670138	0.0013644				STIP1	P31948
Q99490_S927	AGAP2	sp|Q99490|AGAP2_HUMAN	Q99490	TDsQSEAVAIQAIR	0.9291	7623.74	7763.09	6771.08	1.62923	0.00140548				CACTIN	Q8WUQ7
Q9Y2W2_S600	WBP11	sp|Q9Y2W2|WBP11_HUMAN	Q9Y2W2	sEDDSAVPLAK	0.971	6792.07	6718.97	5489.79	2.20759	0.00141025				TCOF1	Q13428
Q9UJV9_S21	DDX41	sp|Q9UJV9|DDX41_HUMAN	Q9UJV9	TDEVPAGGsRSEAEDEDDEDYVPYVPLR	0.9591	4276.81	1265.37	2301	0.151398	0.00142084				RETREG3	Q86VR2
Q16186_S405	ADRM1	sp|Q16186|ADRM1_HUMAN	Q16186	DKKDEEEDMsLD	1	32156.7	33424.8	31208	1.4256	0.00147448				SMARCC1	Q92922
Q9Y580_S136	RBM7	sp|Q9Y580|RBM7_HUMAN	Q9Y580	SFsSPENFQR	0.9737	29376.9	35863.6	31675.4	2.20892	0.00149272				PDHA1	P08559
P42575_S157	CASP2	sp|P42575|CASP2_HUMAN	P42575	LRLsTDTVEHSLDNK	0.9628	8640.01	11039.1	10121.1	4.7131	0.00154917				SRSF1	Q07955
Q8N9N8_S155	EIF1AD	sp|Q8N9N8|EIF1A_HUMAN	Q8N9N8	QYHEsEEEsEEEEAA	0.9664	44805.8	42672.6	42732.8	0.782497	0.00157616				SETD2	Q9BYW2
O15067_S569	PFAS	sp|O15067|PUR4_HUMAN	O15067	sPNRDFLTHVSAR	0.9594	0	0	1793.4	0.114082	0.00159442				LIMD2	Q9BT23
Q8N9N8_S159	EIF1AD	sp|Q8N9N8|EIF1A_HUMAN	Q8N9N8	QYHEsEEEsEEEEAA;QyHESEEEsEEEEAA	0.9665	44805.8	42648.1	42426.7	0.78051	0.00162147				H1-5	P16401
A6NC98_S1408	CCDC88B	sp|A6NC98|CC88B_HUMAN	A6NC98	SSEsFSPGDTPR	0.9698	0	0	0	0	0.00165073				RALGPS2	Q86X27
Q9NTI5_T1188	PDS5B	sp|Q9NTI5|PDS5B_HUMAN	Q9NTI5	GRLDsSEMDHSENEDYtMSSPLPGK	0.8788	4541.99	0	0	0.084739	0.00179425				PPA2	Q9H2U2
Q05084_T409	ICA1	sp|Q05084|ICA69_HUMAN	Q05084	EPVPtMALGEPDPK	1	2238.84	532.977	0	0.14853	0.00179939				NME2	P22392
Q9Y6G9_S516	DYNC1LI1	sp|Q9Y6G9|DC1L1_HUMAN	Q9Y6G9	KPVTVSPTTPTsPTEGEAS;KPVTVSPTtPTsPTEGEAS;KPVTVSPtTPTsPTEGEAS;KPVTVsPTTPTsPTEGEAS	0.9733	96055.3	122188	117765	2.16264	0.00183801				RHEX	Q6ZWK4
Q9HDC5_S479	JPH1	sp|Q9HDC5|JPH1_HUMAN	Q9HDC5	HSHsPASsPKPLK;HSHsPASsPKPLKK;HsHSPASsPKPLK	0.9506	5933.67	10145.3	6339.54	0.222476	0.00185739				SAMSN1	Q9NSI8
Q9C0C2_S836	TNKS1BP1	sp|Q9C0C2|TB182_HUMAN	Q9C0C2	sQEADVQDWEFR	1	11808.7	12623.9	9912.85	2.19652	0.00191364				SLC12A2	P55011
P21796_S104	VDAC1	sp|P21796|VDAC1_HUMAN	P21796	LTFDSSFsPNTGK	0.9737	24127.2	21399.1	23363.5	1.37734	0.00195052				OGFR	Q9NZT2
Q15388_S138	TOMM20	sp|Q15388|TOM20_HUMAN	Q15388	IVSAQsLAEDDVE	0.9627	14113.2	15215.7	16763.5	2.11049	0.0019823				HOMER3	Q9NSC5
Q32P44_S204	EML3	sp|Q32P44|EMAL3_HUMAN	Q32P44	DPLSSPGGPGsR	0.9684	4304.44	4906.99	4065.87	5.14052	0.0020267				PRCC	Q92733
Q9UQ35_S1693	SRRM2	sp|Q9UQ35|SRRM2_HUMAN	Q9UQ35	RSSRsSPELTR;RSsRsSPELTR;SSRssPELTR;sSPELTR	0.9236	77002.1	66954.6	52141.5	0.544151	0.00203711				PTPN6	P29350
Q07666_S20	KHDRBS1	sp|Q07666|KHDR1_HUMAN	Q07666	SGsMDPSGAHPSVR	0.9684	60083.5	52088.1	57308	1.74756	0.00204455				ARFGAP2	Q8N6H7
P63104_T232	YWHAZ	sp|P63104|1433Z_HUMAN	P63104	DNLTLWTSDtQGDEAEAGEGGEN	0.9661	0	0	0	0	0.00207617				TRIO	O75962
P11171_S95	EPB41	sp|P11171|EPB41_HUMAN	P11171	SQVsEEEGKEVESDKEK	0.9679	10961.7	9489.39	10387.8	1.6192	0.00214272				PSIP1	O75475
P23763_S63	VAMP1	sp|P23763|VAMP1_HUMAN	P23763	DQKLsELDDR	1	13957.1	13636.2	15546	1.55906	0.00215426				NOLC1	Q14978
Q5SW79_S958	CEP170	sp|Q5SW79|CE170_HUMAN	Q5SW79	sFTSLYK	0.9701	4985.07	6318.92	5632.41	2.33763	0.002218				SPEN	Q96T58
Q9UGN4_S260	CD300A	sp|Q9UGN4|CLM8_HUMAN	Q9UGN4	EVEVEYSTVAsPR	0.9633	10610	9339.56	8195.41	5.71676	0.00222048				SAC3D1	A6NKF1
Q9BW71_S359	HIRIP3	sp|Q9BW71|HIRP3_HUMAN	Q9BW71	LGSTsGEEsDLER	0.9572	4181.26	4434.35	4974.52	0.498059	0.00224033				CTTNBP2NL	Q9P2B4
Q9BW71_S363	HIRIP3	sp|Q9BW71|HIRP3_HUMAN	Q9BW71	LGSTsGEEsDLER	0.9577	4181.26	4434.35	4974.52	0.498059	0.00224033				AFDN	P55196
Q9BYG3_S247	NIFK	sp|Q9BYG3|MK67I_HUMAN	Q9BYG3	sQVAELNDDDKDDEIVFK	1	11218.5	12653.8	9864.76	2.34077	0.00225659				HTATSF1	O43719
P13639_T59	EEF2	sp|P13639|EF2_HUMAN	P13639	FtDtRKDEQER	1	2771.64	7766.31	0	0.130711	0.00227153				GYS1	P13807
Q9UKV3_S714	ACIN1	sp|Q9UKV3|ACINU_HUMAN	Q9UKV3	RLsQPEsAEK	1	20181.5	21918.1	21776.2	1.25813	0.00234289				NUCKS1	Q9H1E3
Q92974_S645	ARHGEF2	sp|Q92974|ARHG2_HUMAN	Q92974	SEsLESPR	0.9745	81144.8	61411.5	86791	3.23575	0.00239559				DDX3X	O00571
O00231_S14	PSMD11	sp|O00231|PSD11_HUMAN	O00231	AQsLLSTDR	0.9761	9913.75	8817.1	9481.79	1.81916	0.00242212				BET1	O15155
P57737_S465	CORO7	sp|P57737|CORO7_HUMAN	P57737	SLQsLLGPSSK	0.9681	2858.86	4663.69	4617.39	#DIV/0!	0.00242708				AKAP11	Q9UKA4
Q9NWQ8_S229	PAG1	sp|Q9NWQ8|PHAG1_HUMAN	Q9NWQ8	AEFAEYAsVDR	0.9747	18006.1	22857.7	19603.9	0.595088	0.00250333				SEPTIN2	Q15019
Q9UPU5_S1299	USP24	sp|Q9UPU5|UBP24_HUMAN	Q9UPU5	QLsVSDR	0.9697	9336.99	7332.94	8413.26	1.99757	0.00254781				MYBL2	P10244
Q9H4L7_S124	SMARCAD1	sp|Q9H4L7|SMRCD_HUMAN	Q9H4L7	DTVIIVsEPsEDEESQGLPTMAR	0.9333	0	0	0	0	0.00258088				PRRC2B	Q5JSZ5
Q9H4L7_S127	SMARCAD1	sp|Q9H4L7|SMRCD_HUMAN	Q9H4L7	DTVIIVsEPsEDEESQGLPTMAR	0.9333	0	0	0	0	0.00258088				HSP90B1	P14625
Q9BTE7_S9	DCUN1D5	sp|Q9BTE7|DCNL5_HUMAN	Q9BTE7	sPGVAAAVAEDGGLK	1	12642.1	12820.5	11342	1.72566	0.00258932				P2RY8	Q86VZ1
Q92797_S1259	SYMPK	sp|Q92797|SYMPK_HUMAN	Q92797	TPsPAAEDAR;TPsPAAEDAREPEAK	0.9727	5453.8	6346.56	7736.04	0.507832	0.00259779				NCL	P19338
Q14160_S1220	SCRIB	sp|Q14160|SCRIB_HUMAN	Q14160	NsLESISSIDR;NsLESISsIDR;NsLESIsSIDR	0.9765	34598.7	41251.7	38622.5	1.58182	0.00261533				CDYL	Q9Y232
Q02952_S612	AKAP12	sp|Q02952|AKA12_HUMAN	Q02952	EGVTPWAsFK;EGVTPWAsFKK;EGVtPWAsFKK	1	12376.7	14895.4	11130.5	0.532634	0.00268456				PLCB3	Q01970
Q16539_Y182	MAPK14	sp|Q16539|MK14_HUMAN	Q16539	HTDDEMTGyVATR;HTDDEMtGyVATR	0.9762	77871	87616.8	75220.8	1.74356	0.00269443				PPIG	Q13427
O14497_S1184	ARID1A	sp|O14497|ARI1A_HUMAN	O14497	SNsVGIQDAFNDGSDSTFQK	0.9713	28371	36263.5	36485	2.15492	0.00270358				YWHAE	P62258
Q9HDC5_S475	JPH1	sp|Q9HDC5|JPH1_HUMAN	Q9HDC5	HSHsPASsPKPLK;HSHsPASsPKPLKK;HSHsPAsSPKPLK	0.9507	8389.93	11325	9632.83	0.306085	0.00273414				BCL7C	Q8WUZ0
Q9UKV3_S710	ACIN1	sp|Q9UKV3|ACINU_HUMAN	Q9UKV3	RLsQPESAEK;RLsQPEsAEK	1	163745	143356	170032	1.58546	0.00277134				ZNF687	Q8N1G0
Q8N201_S1318	INTS1	sp|Q8N201|INT1_HUMAN	Q8N201	RDsTEAPKPK	0.9561	11702.3	16289	15851.2	3.58929	0.00280311				LARP4B	Q92615
O75061_S566	DNAJC6	sp|O75061|AUXI_HUMAN	O75061	SATsTSAsPTLR	0.9648	20688.4	19299.9	21554.6	1.5012	0.00290595				ZMYM2	Q9UBW7
Q9H307_S66	PNN	sp|Q9H307|PININ_HUMAN	Q9H307	GFsDSGGGPPAK;RGFsDSGGGPPAK	0.976	88773.4	69649.1	101026	3.22769	0.00303663				PFKP	Q01813
Q9UHB6_S490	LIMA1	sp|Q9UHB6|LIMA1_HUMAN	Q9UHB6	ETPHsPGVEDAPIAK	0.9761	31288.2	30573.5	30765.7	1.24151	0.00304021				TNIK	Q9UKE5
P78347_S103	GTF2I	sp|P78347|GTF2I_HUMAN	P78347	MsVDAVEIETLR	0.9759	11398.8	7980.8	10787.5	3.62678	0.00304199				CD33	P20138
Q9UNL2_S105	SSR3	sp|Q9UNL2|SSRG_HUMAN	Q9UNL2	KLsEADNR	1	52329.5	45353.7	58083.2	2.31958	0.00316694				NPM1	P06748
Q7L9L4_T35	MOB1B	sp|Q7L9L4|MOB1B_HUMAN	Q7L9L4	HAEAtLGSGNLR	0.975	7911.36	11807.2	9120.4	0.451166	0.00325044				ZNF638	Q14966
Q5VZL5_S1181	ZMYM4	sp|Q5VZL5|ZMYM4_HUMAN	Q5VZL5	KKsIVAVEPR	1	5799.69	6174.73	5466.7	1.47421	0.00325281				IQGAP2	Q13576
Q13206_S831	DDX10	sp|Q13206|DDX10_HUMAN	Q13206	SNsEVEDVGPTSHNR	0.9631	11505.3	8864.18	10298.8	2.42325	0.00326317				NOL8	Q76FK4
Q86UE4_S298	MTDH	sp|Q86UE4|LYRIC_HUMAN	Q86UE4	LSSQIsAGEEK	0.9756	145057	96270.8	128933	3.79988	0.00331005				CCDC9	Q9Y3X0
P18615_S51	NELFE	sp|P18615|NELFE_HUMAN	P18615	SLsEQPVMDTATATEQAK	0.9695	26025.4	20754	25190.5	2.1915	0.0034065				NCOA5	Q9HCD5
Q9UHD8_S30	SEPTIN9	sp|Q9UHD8|SEPT9_HUMAN	Q9UHD8	sFEVEEVETPNSTPPR	0.9762	23597.1	29857.8	24783.4	2.51863	0.00343777				OSBPL3	Q9H4L5
Q92521_S39	PIGB	sp|Q92521|PIGB_HUMAN	Q92521	sTLYFNTQEK	0.9653	8164.03	6251.55	6060.93	0.141481	0.00346349				AFF4	Q9UHB7
Q9P035_S114	HACD3	sp|Q9P035|HACD3_HUMAN	Q9P035	WLDEsDAEMELR	1	21366.3	21607.1	20337.5	0.60882	0.00346803				MSN	P26038
Q6ZSZ5_S1289	ARHGEF18	sp|Q6ZSZ5|ARHGI_HUMAN	Q6ZSZ5	sLSPILPGR	0.9598	25183.4	38897.9	24112.2	#DIV/0!	0.00349147				CAPZA2	P47755
P01893_S343	HLA-H	sp|P01893|HLAH_HUMAN	P01893	GGsYSQAASSNSAQGSDVSLTA	0.8361	4597.64	3856.64	2553.82	#DIV/0!	0.00356214				ZNF148	Q9UQR1
Q9BUR4_S85	WRAP53	sp|Q9BUR4|TCAB1_HUMAN	Q9BUR4	EGDPVSLSTPLETEFGsPSELsPR	0.8656	0	1069.79	0	0.0740263	0.00359971				JUNB	P17275
Q9BUR4_S90	WRAP53	sp|Q9BUR4|TCAB1_HUMAN	Q9BUR4	EGDPVSLSTPLETEFGsPSELsPR	0.8484	0	1069.79	0	0.0740263	0.00359971				KIF23	Q02241
Q16594_S149	TAF9	sp|Q16594|TAF9_HUMAN	Q16594	LsVGSVTSR	0.9744	6592.57	5550.67	5645.78	5.02285	0.00360649				JADE1	Q6IE81
Q9Y383_S311	LUC7L2	sp|Q9Y383|LC7L2_HUMAN	Q9Y383	SRSSSRsR	0.7888	14118.2	100380	32037.4	0.218001	0.00375349				PHF2	O75151
Q92835_S886	INPP5D	sp|Q92835|SHIP1_HUMAN	Q92835	SLTsHDPMK	0.9223	20159.6	13653.5	13376.2	15.5226	0.00379226				ARHGAP15	Q53QZ3
Q16204_S419	CCDC6	sp|Q16204|CCDC6_HUMAN	Q16204	SNsPDKFK	0.9693	15828.3	14791	22387.3	0.505814	0.00388958				CCNK	O75909
Q8N292_S74	GAPT	sp|Q8N292|GAPT_HUMAN	Q8N292	HEIsVETQDHK	0.9747	8081.13	8038.99	6357.53	1.89619	0.00395175				OSBPL1A	Q9BXW6
P42566_S796	EPS15	sp|P42566|EPS15_HUMAN	P42566	LDsPDPFK;SINKLDsPDPFK;sINKLDsPDPFK	1	39708.9	39415	35439.1	1.36299	0.00395872				ENSA	O43768
O95155_S84	UBE4B	sp|O95155|UBE4B_HUMAN	O95155	SQSSEGVSsLSSSPSNSLETQSQSLSR;SQSSEGVSsLSSsPSNSLETQSQSLSR	0.9679	7094.33	7264.93	10401.2	0.515777	0.00396034				POLA2	Q14181
Q9BRL6_S171	SRSF8	sp|Q9BRL6|SRSF8_HUMAN	Q9BRL6	SRYsRsPYSR	0.9297	5425.54	0	3692.14	0.193282	0.0040511				SLC9A1	P19634
Q09666_S210	AHNAK	sp|Q09666|AHNK_HUMAN	Q09666	LPsGSGAASPTGSAVDIR;LPsGSGAAsPTGSAVDIR;LPsGsGAASPTGSAVDIR	0.9705	60952.6	87031.9	76033	2.92955	0.00410174				LYSMD2	Q8IV50
Q9UQ80_T386	PA2G4	sp|Q9UQ80|PA2G4_HUMAN	Q9UQ80	TAENATSGEtLEENEAGD	0.9737	12330.4	12976	15285.6	2.08451	0.00414872				RNPS1	Q15287
Q9P2K3_S171	RCOR3	sp|Q9P2K3|RCOR3_HUMAN	Q9P2K3	HNQGDsDDDVEETHPMDGNDsDYDPK;HNQGDsDDDVEETHPMDGNDsDYDPKK	0.9521	32359	34422.4	35586.1	0.746156	0.00415424				PYGO2	Q9BRQ0
Q0JRZ9_S403	FCHO2	sp|Q0JRZ9|FCHO2_HUMAN	Q0JRZ9	NLsNEELTK	0.9747	21507.5	20830.2	23018.4	1.26244	0.00425111				ELAC2	Q9BQ52
Q96RK0_S2306	CIC	sp|Q96RK0|CIC_HUMAN	Q96RK0	KNsTDLDSAPEDPTSPK;KNsTDLDSAPEDPTsPK	0.9619	36508.5	24050.7	30659.6	3.49463	0.00426306				VDAC2	P45880
P13796_S5	LCP1	sp|P13796|PLSL_HUMAN	P13796	GsVSDEEMMELR	0.9767	296432	253977	257020	1.62823	0.00427602				ELOA	Q14241
Q86YV0_S790	RASAL3	sp|Q86YV0|RASL3_HUMAN	Q86YV0	SQsLRsVR;sQSLRsVR	0.956	20100.8	30334.6	40477.2	0.428862	0.00432773				FKBP15	Q5T1M5
Q5T200_S370	ZC3H13	sp|Q5T200|ZC3HD_HUMAN	Q5T200	sASPYPSHSLSSPQR;sASPYPSHSLSsPQR	0.9228	10897.5	12638.1	9265.88	2.21733	0.00433747				RB1CC1	Q8TDY2
P33991_S120	MCM4	sp|P33991|MCM4_HUMAN	P33991	QRPDLGsAQK	1	28222.1	26996.9	20716.1	0.594478	0.00433938				BIRC6	Q9NR09
Q14160_S1475	SCRIB	sp|Q14160|SCRIB_HUMAN	Q14160	VQsPEPPAPER	1	36646.2	30397.4	28293.7	2.35383	0.00442879				SQSTM1	Q13501
O75533_T235	SF3B1	sp|O75533|SF3B1_HUMAN	O75533	WDEtPGR	1	9687.03	10787.1	11498	0.756847	0.00443				TLE3	Q04726
Q5T200_S381	ZC3H13	sp|Q5T200|ZC3HD_HUMAN	Q5T200	sASPYPSHSLSsPQR	0.9188	10903.1	12675.3	9270.64	2.21941	0.00444093				HNRNPUL1	Q9BUJ2
P11171_S92	EPB41	sp|P11171|EPB41_HUMAN	P11171	sQVSEEEGKEVESDKEK	0.9761	10014.4	12459.9	12721.4	1.9627	0.00450503				TRIM33	Q9UPN9
Q9NV56_S191	MRGBP	sp|Q9NV56|MRGBP_HUMAN	Q9NV56	VLTANsNPSsPSAAK;VLTANsNPsSPSAAK	0.972	8545.55	13194.3	8917.27	0.446994	0.00454642				ZNF318	Q5VUA4
Q92766_S1219	RREB1	sp|Q92766|RREB1_HUMAN	Q92766	FSPFLQTAEDNTQDEVAGAPADHHGPsDEEQGsPPEDK	0.8873	0	0	0	0	0.00458757				MPLKIP	Q8TAP9
Q92766_S1225	RREB1	sp|Q92766|RREB1_HUMAN	Q92766	FSPFLQTAEDNTQDEVAGAPADHHGPsDEEQGsPPEDK	0.8873	0	0	0	0	0.00458757				RPTOR	Q8N122
Q92900_S1110	UPF1	sp|Q92900|RENT1_HUMAN	Q92900	SQIDVALsQDsTYQGER	0.959	4644.54	7425.77	10097.3	0.446602	0.00463117				CTNND1	O60716
Q92900_S1107	UPF1	sp|Q92900|RENT1_HUMAN	Q92900	SQIDVALsQDSTYQGER;SQIDVALsQDsTYQGER	0.9736	9472.07	12596.3	14019.9	0.607215	0.0046822				PECAM1	P16284
Q58WW2_S336	DCAF6	sp|Q58WW2|DCAF6_HUMAN	Q58WW2	DGEQsPNVSLMQR	0.9741	15311.6	16114.7	13001.2	1.67044	0.00481696				PSMA3	P25788
Q14738_S88	PPP2R5D	sp|Q14738|2A5D_HUMAN	Q14738	QssSRFNLSK;RQssSRFNLSK	0.9608	0	29151	20426.8	0.246781	0.0048531				DOCK8	Q8NF50
Q9UL03_S804	INTS6	sp|Q9UL03|INT6_HUMAN	Q9UL03	sHEEVNTELK	0.9734	19892.9	15999.4	13104.9	3.25576	0.00485733				CDK12	Q9NYV4
Q16555_S518	DPYSL2	sp|Q16555|DPYL2_HUMAN	Q16555	TVTPASsAKTsPAK;TVTPASsAKtSPAK;TVtPASsAKTsPAK;TVtPASsAKtSPAK	0.9655	9005.23	9667.47	11510.8	0.592452	0.00491089				UBAP2L	Q14157
Q13523_S437	PRP4K	sp|Q13523|PRP4K_HUMAN	Q13523	DAsPINRWsPTR;SKDAsPINRWsPTR	0.9741	33283.5	38244.5	26931.4	0.470014	0.00505172				CEP68	Q76N32
Q8IY92_S1452	SLX4	sp|Q8IY92|SLX4_HUMAN	Q8IY92	TGPLSTsSPSR	0.8692	10367.2	5673.76	10519.2	#DIV/0!	0.005101				TOP1	P11387
Q14677_T308	CLINT1	sp|Q14677|EPN4_HUMAN	Q14677	ASPDQNASTHtPQSSVK;ASPDQNASTHtPQSsVK	0.9505	4839.24	0	6595.53	0.238996	0.00512416				DDX54	Q8TDD1
Q7Z6I6_S291	ARHGAP30	sp|Q7Z6I6|RHG30_HUMAN	Q7Z6I6	sIFNLGR	1	3467.64	1675.13	1616.03	0.37719	0.00523449				VIRMA	Q69YN4
P78347_T556	GTF2I	sp|P78347|GTF2I_HUMAN	P78347	tNTPVKEDWNVR	0.9061	0	2435.26	0	0.144007	0.00528502				MARCKS	P29966
P33241_S208	LSP1	sp|P33241|LSP1_HUMAN	P33241	TEsLNRsIEK	0.9554	10824.8	9353.33	12283.8	1.82529	0.00531737				SRSF11	Q05519
Q13459_S1290	MYO9B	sp|Q13459|MYO9B_HUMAN	Q13459	VQEKPDsPGGSTQIQR	0.9743	35513.3	30610.3	32852.7	1.31999	0.00535657				SRSF9	Q13242
P11388_S1374	TOP2A	sp|P11388|TOP2A_HUMAN	P11388	sVVSDLEADDVK	0.9766	22819.2	21905.1	28078.6	1.86841	0.00538203				CDK1	P06493
Q15032_S381	R3HDM1	sp|Q15032|R3HD1_HUMAN	Q15032	ASsFSGISVLTR	0.9637	8434.61	7195.79	6358.36	4.40767	0.00538773				PRKAR2A	P13861
P46087_T195	NOP2	sp|P46087|NOP2_HUMAN	P46087	EAAAGIQWSEEEtEDEEEEKEVtPESGPPK;EAAAGIQWsEEEtEDEEEEKEVtPESGPPK	0.9666	12022.3	17858	8445.63	0.380431	0.00548145				RBM12B	Q8IXT5
Q99081_S79	TCF12	sp|Q99081|HTF4_HUMAN	Q99081	GFTDsPHYSDHLNDSR	0.9692	6696.11	8186.48	6589.09	0.701959	0.00552566				CLK3	P49761
Q16555_T514	DPYSL2	sp|Q16555|DPYL2_HUMAN	Q16555	TVtPASSAKTsPAK;TVtPASsAKTsPAK;TVtPASsAKtSPAK	0.9603	8195.02	8810.13	10409.2	0.586308	0.00559151				KANSL3	Q9P2N6
O76021_S361	RSL1D1	sp|O76021|RL1D1_HUMAN	O76021	ATNEsEDEIPQLVPIGK	0.9687	111297	84042	88961.4	0.488944	0.00561695				GRB10	Q13322
P08238_S445	HSP90AB1	sp|P08238|HS90B_HUMAN	P08238	LGIHEDsTNR	0.8074	5283.09	5562.85	5503.55	1.26829	0.0056487				ARHGAP1	Q07960
O75448_S862	MED24	sp|O75448|MED24_HUMAN	O75448	LLsSNEDDANILSSPTDR;LLsSNEDDANILSsPTDR	0.9696	29212.8	36002.5	35015.7	1.6535	0.00581311				WDR75	Q8IWA0
Q04721_S1778	NOTCH2	sp|Q04721|NOTC2_HUMAN	Q04721	AEDEALLsEEDDPIDR	1	15401.5	17305.8	15538.8	1.3747	0.00584254				SKAP2	O75563
Q9NRY4_S589	ARHGAP35	sp|Q9NRY4|RHG35_HUMAN	Q9NRY4	NsLSDPNIDR	0.9761	11363.8	9070.29	12125.3	2.30367	0.00591719				RBM25	P49756
Q14738_S89	PPP2R5D	sp|Q14738|2A5D_HUMAN	Q14738	QSssRFNLSK;QssSRFNLSK;RQssSRFNLSK	0.9608	0	41137.5	31681.2	0.264566	0.00593072				ROCK2	O75116
Q9BQF6_S11	SENP7	sp|Q9BQF6|SENP7_HUMAN	Q9BQF6	RPsSSEIITEGK	0.7993	17965.1	17475.7	18731.1	2.08998	0.00593358				JUN	P05412
P32519_S168	ELF1	sp|P32519|ELF1_HUMAN	P32519	YADSPGASsPEQPK;YADsPGASsPEQPK	0.9734	54710.9	57531.5	55190.1	1.17108	0.00598071				EDC4	Q6P2E9
Q53SF7_S256	COBLL1	sp|Q53SF7|COBL1_HUMAN	Q53SF7	DQTAsAPATPLVNK;DQTAsAPAtPLVNK	0.975	5508.26	9056.87	7265.86	0.56062	0.00603699				WDR43	Q15061
Q00537_S180	CDK17	sp|Q00537|CDK17_HUMAN	Q00537	RAsLSEIGFGK	0.9591	9715.74	9189.21	8647.78	1.27126	0.00604041				SF3B2	Q13435
P18615_S115	NELFE	sp|P18615|NELFE_HUMAN	P18615	SIsADDDLQESSR	0.9758	130430	105175	127247	1.73031	0.00609495				MAPKAP1	Q9BPZ7
P49768_S367	PSEN1	sp|P49768|PSN1_HUMAN	P49768	AAVQELSSsILAGEDPEER	0.9715	22911	22506.4	24815.7	0.835227	0.00611613				CDK11B	P21127
Q4LE39_S776	ARID4B	sp|Q4LE39|ARI4B_HUMAN	Q4LE39	VHADLVISKPVsKSPER	0.8746	2890.52	0	0	0.159251	0.00617686				EPB41L2	O43491
P33241_S177	LSP1	sp|P33241|LSP1_HUMAN	P33241	TPsPLVLEGTIEQSSPPLSPTTK;TPsPLVLEGTIEQSsPPLSPTTK;TPsPLVLEGtIEQSSPPLsPTTK	0.9198	3895.93	0	3842.29	0.108897	0.00624228				LIG1	P18858
P18583_S1697	SON	sp|P18583|SON_HUMAN	P18583	ESDQTLAALLsPK	0.9761	20324.5	16043.1	14481.3	0.560851	0.00628333				CS	O75390
Q8NFC6_S902	BOD1L1	sp|Q8NFC6|BD1L1_HUMAN	Q8NFC6	TKsLLEEK	0.972	14643.1	8596.93	13090.5	7.34268	0.00631994				TANK	Q92844
P23588_S597	EIF4B	sp|P23588|IF4B_HUMAN	P23588	YAALsVDGEDENEGEDYAE	0.9747	65987.6	60303.3	79344.6	1.99376	0.00646852				PHKA2	P46019
P16150_S291	SPN	sp|P16150|LEUK_HUMAN	P16150	TGALVLsR	0.9756	12289.7	9108.42	7879.43	6.28883	0.00649808				MTFR1L	Q9H019
Q9BRL6_S173	SRSF8	sp|Q9BRL6|SRSF8_HUMAN	Q9BRL6	SRYSRsPYSR;SRYsRsPYSR	0.9311	6742.4	0	3677.61	0.225843	0.00652832				BPTF	Q12830
P18615_S353	NELFE	sp|P18615|NELFE_HUMAN	P18615	SVWGSLAVQNsPK	0.9741	6466.53	5906.61	4560.83	0.64365	0.00655807				SLAIN2	Q9P270
P17544_T326	ATF7	sp|P17544|ATF7_HUMAN	P17544	RRtVDEDPDER	1	3558.33	5319.04	5952.57	6.77262	0.00662569				STK11IP	Q8N1F8
Q9BVJ6_S437	UTP14A	sp|Q9BVJ6|UT14A_HUMAN	Q9BVJ6	SELsQDAEPAGSQETK	0.9737	13979.8	10622.2	10219.1	2.56569	0.00662747				PTPN12	Q05209
Q92890_S299	UFD1	sp|Q92890|UFD1_HUMAN	Q92890	FVAFSGEGQsLR	0.9698	6054.16	3903.73	4734.45	0.590424	0.00663143				ATN1	P54259
Q00722_S953	PLCB2	sp|Q00722|PLCB2_HUMAN	Q00722	LGPGKGsR	1	12040.1	16734.7	15120.4	2.60964	0.00671402				AGFG1	P52594
Q00059_S193	TFAM	sp|Q00059|TFAM_HUMAN	Q00059	NLsDSEKELYIQHAK	0.9665	5607.59	5883.6	4412.25	0.647226	0.00678415				SRRM1	Q8IYB3
Q14160_S1225	SCRIB	sp|Q14160|SCRIB_HUMAN	Q14160	NsLESIsSIDR	0.9435	5356.86	10551.2	10436	#DIV/0!	0.00684991				ZNF22	P17026
Q9UHR5_S52	SAP30BP	sp|Q9UHR5|S30BP_HUMAN	Q9UHR5	GGLVSDAYGEDDFsR	0.959	1757.61	3187.88	3343.14	0.461447	0.00686559				ARHGEF6	Q15052
P05388_S304	RPLP0	sp|P05388|RLA0_HUMAN	P05388	EEsEEsDEDMGFGLFD;VEAKEEsEESDEDMGFGLFD;VEAKEEsEEsDEDMGFGLFD	1	457411	561695	370245	0.462734	0.00706049				CDK13	Q14004
P35251_S71	RFC1	sp|P35251|RFC1_HUMAN	P35251	IIYDSDsESEETLQVK;IIYDsDsESEETLQVK	0.964	22982.9	20671.2	19460.5	0.405079	0.00723975				LIG3	P49916
P42331_S362	ARHGAP25	sp|P42331|RHG25_HUMAN	P42331	DIPLsPPAQK	1	50916.2	53154.8	41906.3	2.11441	0.00731132				THUMPD1	Q9NXG2
P46940_S1443	IQGAP1	sp|P46940|IQGA1_HUMAN	P46940	SKsVKEDSNLTLQEK;sVKEDSNLTLQEK	0.9743	9207.2	7926.7	9672.73	1.73115	0.00732881				WASHC2A	Q641Q2
P18887_S241	XRCC1	sp|P18887|XRCC1_HUMAN	P18887	AIGSTSKPQEsPK	0.9753	9342.93	12258.8	12841.8	0.62952	0.00734817				G3BP2	Q9UN86
Q16204_S417	CCDC6	sp|Q16204|CCDC6_HUMAN	Q16204	sNSPDKFK	0.9529	0	0	0	0	0.00753576				TCEAL1	Q15170
Q14161_Y392	GIT2	sp|Q14161|GIT2_HUMAN	Q14161	TINNQHSVESQDNDQPDyDsVASDEDTDLETTASK	0.8921	20719.1	26331.5	14120.2	0.325574	0.00758246				RBMX	P38159
Q9Y6G9_T513	DYNC1LI1	sp|Q9Y6G9|DC1L1_HUMAN	Q9Y6G9	KPVTVSPTtPTSPTEGEAS;KPVTVSPTtPTsPTEGEAS;KPVTVSPttPTSPTEGEAS	0.9704	50335.5	78453.7	57728.5	3.11012	0.00777815				CTDP1	Q9Y5B0
O95218_S181	ZRANB2	sp|O95218|ZRAB2_HUMAN	O95218	LDEDEDEDDADLsKYNLDAsEEEDSNK;YKLDEDEDEDDADLsKyNLDASEEEDSNK	0.9402	4469.54	3376.5	7486.19	0.373691	0.00810834				PPP1R10	Q96QC0
Q14161_S394	GIT2	sp|Q14161|GIT2_HUMAN	Q14161	TINNQHSVESQDNDQPDYDsVAsDEDTDLETTASK;TINNQHSVESQDNDQPDyDsVASDEDTDLETTASK	0.9465	20611.2	26933.1	14079.9	0.31922	0.00812299				SRSF3	P84103
Q9UQ35_S901	SRRM2	sp|Q9UQ35|SRRM2_HUMAN	Q9UQ35	VKsSTPPRQSPsR;VKsSTPPRQsPSR;VKsStPPRQsPSR;VKssTPPRQsPSR;sSTPPRQsPSR	0.9281	144401	210185	118469	0.484839	0.00818467				EIF4G3	O43432
Q14498_S127	RBM39	sp|Q14498|RBM39_HUMAN	Q14498	sKsPFRK	1	233448	252056	185808	0.440956	0.00833367				PUM2	Q8TB72
Q14498_S129	RBM39	sp|Q14498|RBM39_HUMAN	Q14498	sKsPFRK	1	233448	252056	185808	0.440956	0.00833367				POLR3E	Q9NVU0
P16949_S46	STMN1	sp|P16949|STMN1_HUMAN	P16949	DLsLEEIQK	1	14079.6	17551.6	15218.4	1.54095	0.00834254
Q16555_S522	DPYSL2	sp|Q16555|DPYL2_HUMAN	Q16555	TVTPASSAKTsPAK;TVTPASsAKTsPAK;TVtPASSAKTsPAK;TVtPASsAKTsPAK	0.9652	9066.73	9751.04	11662.1	0.600855	0.00839293
P49792_T2450	RANBP2	sp|P49792|RBP2_HUMAN	P49792	DSLItPHVSR;DSLItPHVsR	0.9733	33443	49266.7	39493.7	0.637206	0.00844203
Q9P0P8_S116	MTRES1	sp|Q9P0P8|MRES1_HUMAN	Q9P0P8	VDEEDSDEEsHHDEMsEQEEELEDDPTVVK;VDEEDsDEESHHDEMsEQEEELEDDPTVVK	0.944	0	12869.9	14819.3	0.191896	0.008686
Q93009_T30	USP7	sp|Q93009|UBP7_HUMAN	Q93009	AGEQQLSEPEDMEMEAGDtDDPPR	0.8524	0	0	0	0	0.00876365
P42331_S533	ARHGAP25	sp|P42331|RHG25_HUMAN	P42331	GDTLAsPNSETGPGK	0.9748	20059.8	13171.1	15108.3	2.67443	0.00877016
Q8NFC6_S1077	BOD1L1	sp|Q8NFC6|BD1L1_HUMAN	Q8NFC6	RGsLSQEMAK	0.9679	19279.3	17204.6	16796.6	1.35711	0.00896383
Q8NDT2_S562	RBM15B	sp|Q8NDT2|RB15B_HUMAN	Q8NDT2	RNsLEGYSR	0.9739	21425.8	21511.5	22441	1.32943	0.00902417
Q5VT52_S1099	RPRD2	sp|Q5VT52|RPRD2_HUMAN	Q5VT52	RMsGEPIQTVESIR	0.9214	8635.59	10775.9	8327.53	1.78337	0.00929473
Q96RK0_S1186	CIC	sp|Q96RK0|CIC_HUMAN	Q96RK0	sSSEAKPTSLGLAGGHK	0.9393	10084.4	11638	8692.43	1.99241	0.00931099
P25205_T674	MCM3	sp|P25205|MCM3_HUMAN	P25205	RSEDEsEtEDEEEKSQEDQEQK;SEDEsEtEDEEEKSQEDQEQK;SEDEsEtEDEEEKSQEDQEQKR	0.975	135744	117618	203167	0.522104	0.00932844
Q7Z6E9_S1625	RBBP6	sp|Q7Z6E9|RBBP6_HUMAN	Q7Z6E9	LsSDLTR	0.9745	17818.4	12731.6	16451.5	2.43597	0.00940568
Q9UQ35_S2044	SRRM2	sp|Q9UQ35|SRRM2_HUMAN	Q9UQ35	sRsPLAIR	1	300851	337835	283962	0.592485	0.00941429
Q9UQ35_S2046	SRRM2	sp|Q9UQ35|SRRM2_HUMAN	Q9UQ35	sRsPLAIR	1	300851	337835	283962	0.592485	0.00941429
Q15027_T739	ACAP1	sp|Q15027|ACAP1_HUMAN	Q15027	SHDLHtL	0.9704	4687.89	5300.23	6968.2	0.578623	0.00951878
P41212_S293	ETV6	sp|P41212|ETV6_HUMAN	P41212	LsEDGLHR	1	9962.48	9328.97	8761.7	3.39781	0.00967894
Q14137_S126	BOP1	sp|Q14137|BOP1_HUMAN	Q14137	IGDEYAEDssDEEDIR	0.9756	24237	24171.9	35544.2	0.602268	0.00969878
Q14137_S127	BOP1	sp|Q14137|BOP1_HUMAN	Q14137	IGDEYAEDssDEEDIR	0.9756	24237	24171.9	35544.2	0.602268	0.00969878
Q9Y6X9_S743	MORC2	sp|Q9Y6X9|MORC2_HUMAN	Q9Y6X9	KRsVAVsDEEEVEEEAER;RsVAVsDEEEVEEEAER;SVAVsDEEEVEEEAER;sVAVsDEEEVEEEAER	1	34980.3	35668.3	32937.8	1.38028	0.00976428
Q7Z2W4_S284	ZC3HAV1	sp|Q7Z2W4|ZCCHV_HUMAN	Q7Z2W4	AsLEDAPVDDLTR	0.9768	42805	35984.4	41803.9	1.40869	0.00976576
Q9UKM9_T286	RALY	sp|Q9UKM9|RALY_HUMAN	Q9UKM9	DDGDEEGLLtHSEEELEHSQDTDADDGALQ;DDGDEEGLLtHSEEELEHSQDtDADDGALQ;DDGDEEGLLtHSEEELEHsQDTDADDGALQ;DDGDEEGLLtHsEEELEHSQDTDADDGALQ;TRDDGDEEGLLtHSEEELEHSQDTDADDGALQ;TRDDGDEEGLLtHSEEELEHSQDtDADDGALQ;TRDDGDEEGLLtHsEEELEHSQDTDADDGALQ	0.9669	210804	198754	214862	0.664709	0.00978917
Q13263_S473	TRIM28	sp|Q13263|TIF1B_HUMAN	Q13263	SRsGEGEVSGLMR;sGEGEVSGLMR	0.9769	137778	95808.9	117572	2.06645	0.00992611
Q58A45_T350	PAN3	sp|Q58A45|PAN3_HUMAN	Q58A45	ItPHTsPAPR;ItPHtSPAPR	0.9628	9010.67	17512.5	13113.5	0.484131	0.00996122
Q5UIP0_S1579	RIF1	sp|Q5UIP0|RIF1_HUMAN	Q5UIP0	SNEsVDIQDQEEK	0.9754	32328.3	23994.9	26260	2.25585	0.0100459
Q9BRL6_S26	SRSF8	sp|Q9BRL6|SRSF8_HUMAN	Q9BRL6	TsPDSLR	0.7749	5526.87	5491.39	6218.47	1.33142	0.0100505
Q9Y6X9_S739	MORC2	sp|Q9Y6X9|MORC2_HUMAN	Q9Y6X9	KRsVAVsDEEEVEEEAER;RsVAVsDEEEVEEEAER;sVAVsDEEEVEEEAER	1	25596.7	30945.5	22068	1.94615	0.0101614
Q96RU3_S299	FNBP1	sp|Q96RU3|FNBP1_HUMAN	Q96RU3	TVSDNsLSNSR;TVsDNsLSNSR;tVSDNsLSNSR	0.975	174050	153883	186931	0.623694	0.01023
O75400_S885	PRPF40A	sp|O75400|PR40A_HUMAN	O75400	HKSDsPEsDAEREK;SDsPEsDAEREK	0.9725	5563.67	14315	19420.7	0.405694	0.0103118
P46087_S181	NOP2	sp|P46087|NOP2_HUMAN	P46087	EAAAGIQWsEEEtEDEEEEKEVTPESGPPK;EAAAGIQWsEEEtEDEEEEKEVtPESGPPK	0.9718	82438.4	150612	83888.4	0.49084	0.0104279
P46087_T185	NOP2	sp|P46087|NOP2_HUMAN	P46087	EAAAGIQWSEEEtEDEEEEKEVtPESGPPK;EAAAGIQWsEEEtEDEEEEKEVTPESGPPK;EAAAGIQWsEEEtEDEEEEKEVtPESGPPK	0.9718	82438.4	150612	83888.4	0.49084	0.0104279
Q9UKJ3_S1107	GPATCH8	sp|Q9UKJ3|GPTC8_HUMAN	Q9UKJ3	KPsVSEEVQATPNK	0.9721	56614.5	52456.7	44603.8	1.49504	0.0105177
Q5SW79_S466	CEP170	sp|Q5SW79|CE170_HUMAN	Q5SW79	SSGsLGHRPSQEMDK	0.9632	9402.85	8602.88	7557.89	3.48429	0.0105356
P31948_S481	STIP1	sp|P31948|STIP1_HUMAN	P31948	HDsPEDVK;HDsPEDVKR	1	6627.18	8720.06	8393.02	1.84595	0.0106375
Q14738_S90	PPP2R5D	sp|Q14738|2A5D_HUMAN	Q14738	QSssRFNLSK	0.9013	0	0	34036.4	0.168175	0.01073
Q5T200_S209	ZC3H13	sp|Q5T200|ZC3HD_HUMAN	Q5T200	SKLSPsPSLR;SKLsPsPSLR;SKLsPsPSLRK	0.9736	143217	181014	156938	0.73777	0.0108346
O75592_S3505	MYCBP2	sp|O75592|MYCB2_HUMAN	O75592	VNsGDTEVGSSLLR	0.9758	20245.6	19685	20272.7	1.81104	0.0110908
O60293_S809	ZFC3H1	sp|O60293|ZC3H1_HUMAN	O60293	TSSSSPANsDVEIDGIGR;TSSSsPANsDVEIDGIGR	0.9666	9429.86	9098.55	9452.96	0.635109	0.011134
Q8WUQ7_S71	CACTIN	sp|Q8WUQ7|CATIN_HUMAN	Q8WUQ7	sRsPPRPK	1	18521.2	18175.6	11978.6	0.428473	0.0112829
Q8WUQ7_S73	CACTIN	sp|Q8WUQ7|CATIN_HUMAN	Q8WUQ7	sRsPPRPK	1	18521.2	18175.6	11978.6	0.428473	0.0112829
P57081_S391	WDR4	sp|P57081|WDR4_HUMAN	P57081	RRsPPPGPDGHAK	1	6689.76	6138.38	6849.88	0.488594	0.0112854
Q9Y2W1_S672	THRAP3	sp|Q9Y2W1|TR150_HUMAN	Q9Y2W1	KsPEIHR;NKKsPEIHR	1	37212.9	40089.8	45726.6	1.98937	0.0113773
P25098_S670	GRK2	sp|P25098|ARBK1_HUMAN	P25098	NKPRsPVVELSK;sPVVELSK	0.9767	88458.9	73616.6	66614.2	1.68518	0.011613
P49585_S323	PCYT1A	sp|P49585|PCY1A_HUMAN	P49585	MLQAIsPKQsPSSsPTR	0.9644	13784.3	24979.4	7776.24	0.386592	0.0116557
Q13428_S156	TCOF1	sp|Q13428|TCOF_HUMAN	Q13428	TVANLLSGKsPR	0.9731	12012.6	12913.3	8871.2	0.673062	0.0116672
Q14160_S1508	SCRIB	sp|Q14160|SCRIB_HUMAN	Q14160	MKsLEQDALR	1	13666.8	11856.8	12150.5	0.511008	0.011738
Q13459_T1346	MYO9B	sp|Q13459|MYO9B_HUMAN	Q13459	ATGAALtPTEER	0.9677	9696.59	8913.65	13190.5	4.15983	0.0117526
Q9H1B7_S547	IRF2BPL	sp|Q9H1B7|I2BPL_HUMAN	Q9H1B7	KAsPEPPDSAEGALK	0.9762	35912.9	32961.6	35866.7	1.18263	0.0117792
Q86VR2_S26	RETREG3	sp|Q86VR2|RETR3_HUMAN	Q86VR2	DVsGSWER	0.9729	13345.7	12129.3	10534.6	3.65917	0.0119246
P35269_S431	GTF2F1	sp|P35269|T2FA_HUMAN	P35269	LDTGPQsLSGKSTPQPPSGK;LDTGPQsLSGKStPQPPSGK	0.7693	2816.84	4084.67	7427.3	0.294348	0.0119381
Q92608_S1685	DOCK2	sp|Q92608|DOCK2_HUMAN	Q92608	VEQEEPIsPGSTLPEVK	0.9749	106519	142012	122829	1.95206	0.0119873
O75152_S290	ZC3H11A	sp|O75152|ZC11A_HUMAN	O75152	KFsAGGDSDPPLK;KFsAGGDSDPPLKR	0.9732	20323.8	17420.1	11496.2	5.25154	0.011992
Q92922_S357	SMARCC1	sp|Q92922|SMRC1_HUMAN	Q92922	sQKEEDEQEDLTK	0.9728	10056.9	9486.05	6743.01	2.13271	0.0120358
Q15154_S1283	PCM1	sp|Q15154|PCM1_HUMAN	Q15154	KAsAQASLASK	0.9738	16102.5	20930	21785.9	1.78287	0.0120667
P04792_S82	HSPB1	sp|P04792|HSPB1_HUMAN	P04792	QLsSGVSEIR	0.9758	111112	114309	85547.4	1.84471	0.0120992
Q5XUX1_S59	FBXW9	sp|Q5XUX1|FBXW9_HUMAN	Q5XUX1	PSQLStPAAsPSASEPR	0.8959	3746.18	0	3443.93	0.254168	0.012511
Q5XUX1_T55	FBXW9	sp|Q5XUX1|FBXW9_HUMAN	Q5XUX1	PSQLStPAAsPSASEPR	0.8839	3746.18	0	3443.93	0.254168	0.012511
P67809_S102	YBX1	sp|P67809|YBOX1_HUMAN	P67809	sVGDGETVEFDVVEGEK	0.9722	13656.6	12670.9	16482.8	2.70409	0.0125138
P08559_S300	PDHA1	sp|P08559|ODPA_HUMAN	P08559	YHGHSMsDPGVsYR;YHGHsMSDPGVsYR	0.9687	76403.3	153851	78272.4	0.450363	0.0126202
Q6Y7W6_T382	GIGYF2	sp|Q6Y7W6|GGYF2_HUMAN	Q6Y7W6	PGtPSDHQSQEASQFER	0.9756	23158.9	22415.3	20990.9	1.17393	0.0127882
Q07955_S201	SRSF1	sp|Q07955|SRSF1_HUMAN	Q07955	VDGPRSPsyGR;VDGPRsPsYGR;VDGPRsPsYGRsR;VDGPRsPsyGRSR;VKVDGPRsPsYGR	0.9755	790051	1261631	1.33043e+06	0.503392	0.0128014
Q9BYW2_S2082	SETD2	sp|Q9BYW2|SETD2_HUMAN	Q9BYW2	RSSLsPPSSAYER;RSsLsPPSSAYER	0.9633	13620.4	18128.9	16905.1	0.594743	0.0128285
Q9Y4A5_S2051	TRRAP	sp|Q9Y4A5|TRRAP_HUMAN	Q9Y4A5	GLsVDSAQEVK;RGLsVDSAQEVK	0.9765	27733.3	16426.7	25011.3	2.83946	0.0130607
Q9BT23_S29	LIMD2	sp|Q9BT23|LIMD2_HUMAN	Q9BT23	SKsFSLR	0.8869	36869.7	33202.8	33811.8	0.584121	0.0132174
P18583_S2020	SON	sp|P18583|SON_HUMAN	P18583	RsRtPLR;sRtPLRR	1	99115.1	174094	125350	0.296243	0.0133896
P18583_T2022	SON	sp|P18583|SON_HUMAN	P18583	RsRtPLR;sRtPLRR	1	99115.1	174094	125350	0.296243	0.0133896
P16401_T11	H1-5	sp|P16401|H15_HUMAN	P16401	SETAPAETAtPAPVEK;SETAPAETAtPAPVEKsPAK;SETAPAETAtPAPVEKsPAKK	0.9738	28430.2	32924.7	29011.3	0.729317	0.0133935
Q86X27_S308	RALGPS2	sp|Q86X27|RGPS2_HUMAN	Q86X27	EDLVGPEVGAsPQSGR;SAAsREDLVGPEVGAsPQSGR	0.961	5413.29	5459.61	4876.56	0.72107	0.013419
Q9H2U2_S317	PPA2	sp|Q9H2U2|IPYR2_HUMAN	Q9H2U2	SLVESVSSsPNK	0.9696	31384.4	33133.4	26870.3	1.40383	0.0135135
P22392_S120	NME2	sp|P22392|NDKB_HUMAN	P22392	NIIHGsDSVK	0.9144	4016.15	4245.4	3347.95	0.490327	0.0137664
Q6ZWK4_S128	RHEX	sp|Q6ZWK4|RHEX_HUMAN	Q6ZWK4	NDsPLDYENIK	0.9761	20932.3	20656.5	19960.6	1.38907	0.0138854
Q9HAW4_S950	CLSPN	sp|Q9HAW4|CLSPN_HUMAN	Q9HAW4	FTsQDAsTPASSELNK	0.9574	4129.57	6278.65	0	0.297924	0.013929
Q9HAW4_S954	CLSPN	sp|Q9HAW4|CLSPN_HUMAN	Q9HAW4	FTSQDAsTPASSELNK;FTsQDAsTPASSELNK	0.9572	4334.77	6590.63	0	0.297924	0.013929
P61073_S319	CXCR4	sp|P61073|CXCR4_HUMAN	P61073	TSAQHALTsVSR;TSAQHALTsVsR;TSAQHALtsVSR	0.9678	25270.8	25039.2	22153.6	0.719276	0.0139982
Q9Y520_S2105	PRRC2C	sp|Q9Y520|PRC2C_HUMAN	Q9Y520	LPDLsPVENK	1	25852.8	19155.6	23705.9	1.59084	0.0140042
Q9NSI8_S90	SAMSN1	sp|Q9NSI8|SAMN1_HUMAN	Q9NSI8	ALsEEKDEEDGENAHPYR	0.9767	72913.3	58019.2	53188.2	1.74605	0.0140542
O15417_S2771	TNRC18	sp|O15417|TNC18_HUMAN	O15417	LPsVENRPK	1	9899.6	5339.7	7490.24	5.60521	0.0141333
Q9ULU4_S406	ZMYND8	sp|Q9ULU4|ZMYD8_HUMAN	Q9ULU4	LNFDMTAsPK	0.9672	13761.8	11511.7	13385.2	1.44899	0.014176
P55011_T212	SLC12A2	sp|P55011|S12A2_HUMAN	P55011	tFGHNtMDAVPR	1	4771.05	16271.6	5158.73	0.342824	0.014344
P55011_T217	SLC12A2	sp|P55011|S12A2_HUMAN	P55011	tFGHNtMDAVPR	1	4771.05	16271.6	5158.73	0.342824	0.014344
Q9NZT2_T514	OGFR	sp|Q9NZT2|OGFR_HUMAN	Q9NZT2	EGtPGSPSETPGPsPAGPAGDEPAESPSETPGPR	0.9328	16762.8	0	0	0.181723	0.0143733
Q9NSC5_S159	HOMER3	sp|Q9NSC5|HOME3_HUMAN	Q9NSC5	SQsADAPGPTER	0.9701	10078.1	8181.97	10014.2	4.01447	0.0144121
O75592_S1624	MYCBP2	sp|O75592|MYCB2_HUMAN	O75592	QVsTENDSTLVHR	0.9681	13775.9	10264.2	9817.29	1.91347	0.0144493
Q14669_S312	TRIP12	sp|Q14669|TRIPC_HUMAN	Q14669	SEsPPAELPSLR	0.9712	49072.6	51237	58386.4	1.3074	0.0144843
O94880_S835	PHF14	sp|O94880|PHF14_HUMAN	O94880	sFVPEEEKHEER	1	40961.6	40894	29085.6	1.91002	0.0145292
Q9P2K3_S156	RCOR3	sp|Q9P2K3|RCOR3_HUMAN	Q9P2K3	HNQGDsDDDVEETHPMDGNDSDYDPK;HNQGDsDDDVEETHPMDGNDsDYDPK;HNQGDsDDDVEETHPMDGNDsDYDPKK	0.962	40585.3	39103.9	32777	0.779463	0.0148317
Q92733_S157	PRCC	sp|Q92733|PRCC_HUMAN	Q92733	IAAPELHKGDsDsEEDEPTK	0.9737	24951.3	63925.5	31025.5	0.416913	0.0149006
Q92733_S159	PRCC	sp|Q92733|PRCC_HUMAN	Q92733	IAAPELHKGDsDsEEDEPTK	0.9737	24951.3	63925.5	31025.5	0.416913	0.0149006
Q9BRD0_S222	BUD13	sp|Q9BRD0|BUD13_HUMAN	Q9BRD0	VRHDsPDPsPPR;VRHDsPDPsPPRR	1	6458.17	15905.8	12487.4	0.486563	0.015062
Q9BRD0_S226	BUD13	sp|Q9BRD0|BUD13_HUMAN	Q9BRD0	VRHDsPDPsPPR;VRHDsPDPsPPRR	1	6458.17	15905.8	12487.4	0.486563	0.015062
Q9UPN7_S635	PPP6R1	sp|Q9UPN7|PP6R1_HUMAN	Q9UPN7	IQQFDDDEEEEDEEEAQGsGEsDGEDGAWQGSQLAR	0.9746	16958.7	19772.7	15744.7	0.338955	0.0150745
Q9UPN7_S638	PPP6R1	sp|Q9UPN7|PP6R1_HUMAN	Q9UPN7	IQQFDDDEEEEDEEEAQGsGEsDGEDGAWQGSQLAR	0.9746	16958.7	19772.7	15744.7	0.338955	0.0150745
Q9Y6G9_S510	DYNC1LI1	sp|Q9Y6G9|DC1L1_HUMAN	Q9Y6G9	KPVTVsPTTPTSPTEGEAS;KPVTVsPTTPTsPTEGEAS	0.9646	39282.6	58450	59675.7	2.06132	0.0150898
P29350_Y564	PTPN6	sp|P29350|PTN6_HUMAN	P29350	HKEDVyENLHTK	0.9623	7370.83	6722.73	5538.77	2.03253	0.0152914
Q96BY6_S12	DOCK10	sp|Q96BY6|DOC10_HUMAN	Q96BY6	sLLRPGQAAELR	1	8144.44	9514.74	4681.4	0.518639	0.0153904
Q8N6H7_S432	ARFGAP2	sp|Q8N6H7|ARFG2_HUMAN	Q8N6H7	AIsSDMFFGR	0.9706	8941.03	8474.45	6474.74	2.46569	0.0154608
O75962_S1785	TRIO	sp|O75962|TRIO_HUMAN	O75962	RLssGKADGHVK	1	0	2133.12	0	0.0816214	0.0155673
O75962_S1786	TRIO	sp|O75962|TRIO_HUMAN	O75962	RLssGKADGHVK	1	0	2133.12	0	0.0816214	0.0155673
P08559_S293	PDHA1	sp|P08559|ODPA_HUMAN	P08559	YHGHsMSDPGVSYR;YHGHsMSDPGVsYR	0.9726	92337.5	159160	93667	0.543016	0.0156249
O75475_S116	PSIP1	sp|O75475|PSIP1_HUMAN	O75475	ETsVSKEDTDHEEKASNEDVTK;ETsVSKEDTDHEEKAsNEDVTK;ETsVSKEDtDHEEK;ETsVSKEDtDHEEKAsNEDVTK	0.9514	7527.51	12560.7	6428.02	0.490519	0.0156624
P28482_Y187	MAPK1	sp|P28482|MK01_HUMAN	P28482	VADPDHDHTGFLTEyVATR;VADPDHDHTGFLtEyVATR	0.9736	17556.1	35002.3	18275.4	40.9304	0.0158504
P25205_S672	MCM3	sp|P25205|MCM3_HUMAN	P25205	RSEDEsEtEDEEEKSQEDQEQK;SEDEsETEDEEEKSQEDQEQK;SEDEsETEDEEEKsQEDQEQKR;SEDEsEtEDEEEKSQEDQEQK;SEDEsEtEDEEEKSQEDQEQKR	0.975	157188	147340	216039	0.643745	0.0158945
P49585_S319	PCYT1A	sp|P49585|PCY1A_HUMAN	P49585	MLQAIsPKQsPSSSPTR;MLQAIsPKQsPSSsPTR;MLQAIsPKQsPsSSPTR	0.9645	9068.69	26891.8	7839.07	0.348697	0.0159055
Q86WB0_S359	ZC3HC1	sp|Q86WB0|ZC3C1_HUMAN	Q86WB0	SWDSSsPVDRPEPEAAsPTTR	0.9657	0	6790.23	0	0.197625	0.0166572
O95239_S801	KIF4A	sp|O95239|KIF4A_HUMAN	O95239	TFsLTEVR	0.9732	10630.7	7414.15	12297.1	2.57332	0.016698
Q6NYC8_S224	PPP1R18	sp|Q6NYC8|PPR18_HUMAN	Q6NYC8	LsPGESAYQK	0.9746	13637.1	9883.98	12923.7	1.67451	0.017067
Q14978_S538	NOLC1	sp|Q14978|NOLC1_HUMAN	Q14978	GKGsPRPQAPK;GsPRPQAPK	1	58538	57133.4	56973.8	0.639607	0.0171577
O75400_S888	PRPF40A	sp|O75400|PR40A_HUMAN	O75400	HKSDsPEsDAEREK;HKsDSPEsDAEREK;SDSPEsDAEREK;SDsPEsDAEREK	0.9729	6883.23	14360.3	21343.2	0.455465	0.017204
Q96QH2_S334	PRAM1	sp|Q96QH2|PRAM_HUMAN	Q96QH2	TSsEPEFNSLPR;TSsEPEFNsLPR	0.97	26465.6	26599.7	28307.7	0.841252	0.0172634
O15164_S1042	TRIM24	sp|O15164|TIF1A_HUMAN	O15164	LKsIEER	1	63091.2	45421.7	57777.7	1.73623	0.0173368
O75152_T321	ZC3H11A	sp|O75152|ZC11A_HUMAN	O75152	KVEAPETNIDKtPK	0.9721	8135.99	8355.33	9819.34	0.792899	0.0174266
Q96T58_S623	SPEN	sp|Q96T58|MINT_HUMAN	Q96T58	RAsYDYNQDR	0.9435	7002.41	9405.24	11077.2	2.24983	0.0174392
P49792_S796	RANBP2	sp|P49792|RBP2_HUMAN	P49792	SYKYsPKtPPR;SYKysPKTPPR;YsPKtPPR	0.962	69398.1	80142.9	77977.3	1.20641	0.0176721
Q9UKM9_S288	RALY	sp|Q9UKM9|RALY_HUMAN	Q9UKM9	DDGDEEGLLTHsEEELEHSQDTDADDGALQ;DDGDEEGLLTHsEEELEHSQDtDADDGALQ;DDGDEEGLLTHsEEELEHsQDTDADDGALQ;DDGDEEGLLtHsEEELEHSQDTDADDGALQ;TRDDGDEEGLLTHsEEELEHSQDTDADDGALQ;TRDDGDEEGLLTHsEEELEHSQDtDADDGALQ;TRDDGDEEGLLTHsEEELEHsQDTDADDGALQ;TRDDGDEEGLLtHsEEELEHSQDTDADDGALQ	0.9669	245642	232714	190136	0.770922	0.0179013
Q9NYF8_S389	BCLAF1	sp|Q9NYF8|BCLF1_HUMAN	Q9NYF8	AEGEWEDQEALDYFSDKEsGK;AEGEWEDQEALDYFsDKEsGK;AEGEWEDQEALDYFsDKEsGKQK	0.961	6615.98	10277.8	5504.1	0.436291	0.0180038
Q9H3P2_T277	NELFA	sp|Q9H3P2|NELFA_HUMAN	Q9H3P2	tLDAEVVEKPAK	1	10078.2	7624.14	3728.04	#DIV/0!	0.0180885
Q9UQ35_S908	SRRM2	sp|Q9UQ35|SRRM2_HUMAN	Q9UQ35	SSTPPRQsPSR;SStPPRQsPSR;VKsSTPPRQsPSR;VKsStPPRQsPSR;VKssTPPRQsPSR;sSTPPRQsPSR	0.9668	200594	221926	119515	0.493904	0.0181724
O00161_S20	SNAP23	sp|O00161|SNP23_HUMAN	O00161	AHQITDEsLESTR	0.9716	10567.2	7958.37	9754.68	1.52539	0.0182628
P55010_S389	EIF5	sp|P55010|IF5_HUMAN	P55010	EAEEEssGGEEEDEDENIEVVYSK	0.9681	0	1723.99	0	0.0507804	0.0182736
P55010_S390	EIF5	sp|P55010|IF5_HUMAN	P55010	EAEEEssGGEEEDEDENIEVVYSK	0.9681	0	1723.99	0	0.0507804	0.0182736
Q14676_S453	MDC1	sp|Q14676|MDC1_HUMAN	Q14676	SQTTTERDsDtDVEEEELPVENR	0.9678	0	25770.7	25078.1	0.257061	0.0183283
Q14676_T455	MDC1	sp|Q14676|MDC1_HUMAN	Q14676	SQTTTERDSDtDVEEEELPVENR;SQTTTERDsDtDVEEEELPVENR	0.9678	0	25770.7	25078.1	0.257061	0.0183283
P46100_S849	ATRX	sp|P46100|ATRX_HUMAN	P46100	DFDssEDEKHSK	0.9633	0	2135.55	3047.95	0.219833	0.0184947
P46100_S850	ATRX	sp|P46100|ATRX_HUMAN	P46100	DFDssEDEKHSK	0.9633	0	2135.55	3047.95	0.219833	0.0184947
Q9H8G2_S89	CAAP1	sp|Q9H8G2|CAAP1_HUMAN	Q9H8G2	sTDSSSVSGSLQQETK	0.9707	23041.1	21847.7	23585.7	1.85787	0.0185121
A6NKF1_S402	SAC3D1	sp|A6NKF1|SAC31_HUMAN	A6NKF1	TLEEVVMAEEEDEGTDRPGsPA	0.9755	6763.37	8992.78	8111.3	0.593387	0.0186135
Q96RU3_T294	FNBP1	sp|Q96RU3|FNBP1_HUMAN	Q96RU3	tVSDNsLSNSR	0.8826	8029.26	4270.08	7259.49	0.439134	0.01866
Q03164_T163	KMT2A	sp|Q03164|KMT2A_HUMAN	Q03164	VRsPtRSPSVK	0.8957	10095.7	0	0	0.195947	0.0186717
Q9P2B4_S488	CTTNBP2NL	sp|Q9P2B4|CT2NL_HUMAN	Q9P2B4	DLsPTLIDNSAAK	0.9734	10891.8	8244.88	9381.88	1.67579	0.018978
Q6PKG0_S631	LARP1	sp|Q6PKG0|LARP1_HUMAN	Q6PKG0	NTFTAWSDEEsDYEIDDR;NTFTAWsDEEsDYEIDDR	0.9639	6548.12	15916.6	6525.36	0.341206	0.0190682
P55196_S1172	AFDN	sp|P55196|AFAD_HUMAN	P55196	sSPNVANQPPsPGGK	0.7549	7312.95	10739	8557.13	0.590306	0.0190892
P55196_S1182	AFDN	sp|P55196|AFAD_HUMAN	P55196	sSPNVANQPPsPGGK	0.7626	7312.95	10739	8557.13	0.590306	0.0190892
P38398_S403	BRCA1	sp|P38398|BRCA1_HUMAN	P38398	SDELLGsDDSHDGEsESNAK	0.9243	4117.51	5135.18	4521.86	0.41482	0.019095
Q96D71_S709	REPS1	sp|Q96D71|REPS1_HUMAN	Q96D71	LKsEDELRPEVDEHTQK	0.9758	35193.4	36200.6	34381	1.33816	0.0191765
O43719_S616	HTATSF1	sp|O43719|HTSF1_HUMAN	O43719	VLDEEGsER;VLDEEGsEREFDEDsDEKEEEEDTYEK	1	219361	236618	231430	0.735068	0.0195628
O43399_T163	TPD52L2	sp|O43399|TPD54_HUMAN	O43399	NsAtFKSFEDR	0.775	0	0	4179.65	0.200946	0.0196859
Q9UQ35_S404	SRRM2	sp|Q9UQ35|SRRM2_HUMAN	Q9UQ35	DRsPPKsPEK	1	61006.6	75613.4	45234	0.476739	0.0197275
Q9UQ35_S408	SRRM2	sp|Q9UQ35|SRRM2_HUMAN	Q9UQ35	DRsPPKsPEK	1	61006.6	75613.4	45234	0.476739	0.0197275
Q9UQ35_S1694	SRRM2	sp|Q9UQ35|SRRM2_HUMAN	Q9UQ35	RSsRSsPELTR;RsSRSsPELTR;SSRssPELTR;SsPELTR;SsRSsPELTR;sSRSsPELTR	0.9482	343282	276892	372743	0.618226	0.0197611
P13807_S710	GYS1	sp|P13807|GYS1_HUMAN	P13807	RNsVDTATSSSLSTPSEPLsPTSSLGEER	0.8111	22005.5	44699	26262.8	11.0891	0.019822
Q15910_S363	EZH2	sp|Q15910|EZH2_HUMAN	Q15910	LPNNSsRPStPTINVLESK;LPNNSsRPsTPTINVLESK	0.9289	0	0	23399.9	0.196128	0.0198249
Q5JQS6_S94	GCSAML	sp|Q5JQS6|GSAML_HUMAN	Q5JQS6	SSLSSNDDGYENIDsLTR;SSLSsNDDGYENIDsLTR;SsLSSNDDGYENIDsLTR;sSLSSNDDGYENIDsLTR	0.9733	19224.3	21997.9	27698	0.70519	0.0198379
Q13523_S427	PRP4K	sp|Q13523|PRP4K_HUMAN	Q13523	ERsKDAsPINR;sKDAsPINR	1	30626.5	95365.6	69856.2	0.408997	0.0198413
Q9H1E3_S30	NUCKS1	sp|Q9H1E3|NUCKS_HUMAN	Q9H1E3	VVDYSQFQEsDDADEDYGRDsGPPTK	0.9323	8065.92	0	10888.5	0.272237	0.0198467
Q9UQ35_T903	SRRM2	sp|Q9UQ35|SRRM2_HUMAN	Q9UQ35	SStPPRQsPSR;VKsStPPRQsPSR	0.9667	110143	151980	69185.3	0.40548	0.0199948
Q86YS7_S305	C2CD5	sp|Q86YS7|C2CD5_HUMAN	Q86YS7	QSsSSDTDLSLtPK;QSsSSDTDLsLTPK	0.9627	0	0	5835.11	0.148332	0.0200313
O00571_S82	DDX3X	sp|O00571|DDX3X_HUMAN	O00571	GKsSFFSDR	0.9723	4289.87	2778.58	0	0.26682	0.0200321
Q15154_S533	PCM1	sp|Q15154|PCM1_HUMAN	Q15154	KDEETEEsEYDsEHENSEPVTNIR;KDEEtEEsEYDsEHENSEPVTNIR	0.9399	8827.51	11466.3	0	0.268348	0.0200436
Q16204_S323	CCDC6	sp|Q16204|CCDC6_HUMAN	Q16204	QLsESESSLEMDDER;QLsESESsLEMDDER	0.9668	12188.1	11617.6	7696.34	2.11842	0.0201748
O15155_S50	BET1	sp|O15155|BET1_HUMAN	O15155	SLsIEIGHEVK	0.9678	18304.1	11848.9	14096.8	5.59878	0.0202018
Q9BW71_S227	HIRIP3	sp|Q9BW71|HIRP3_HUMAN	Q9BW71	ESEQEsEEEILAQK;SLKEsEQEsEEEILAQK;SLKEsEQEsEEEILAQKK;sLKESEQEsEEEILAQK	0.9762	100344	110256	104485	0.875523	0.020208
Q9H1E3_S19	NUCKS1	sp|Q9H1E3|NUCKS_HUMAN	Q9H1E3	KVVDYSQFQEsDDADEDYGR;VVDYSQFQEsDDADEDYGR;VVDYSQFQEsDDADEDYGRDSGPPtK;VVDYSQFQEsDDADEDYGRDsGPPTK	0.9765	328623	374507	263024	0.670474	0.020263
Q9UI08_S331	EVL	sp|Q9UI08|EVL_HUMAN	Q9UI08	SNsVEKPVSSILSR	0.971	37562.6	34684.8	25331.9	1.74743	0.0203202
Q8N9T8_S171	KRI1	sp|Q8N9T8|KRI1_HUMAN	Q8N9T8	AFVEDsEDEDGAGEGGSSLLQK	0.9764	74375.9	66662.7	78992.9	1.2514	0.0203271
Q9UKA4_S1171	AKAP11	sp|Q9UKA4|AKA11_HUMAN	Q9UKA4	SLsEEVESSESGELPEVDVK	0.9648	11787.3	12347.9	16338.1	3.76899	0.0203841
Q15019_S218	SEPTIN2	sp|Q15019|SEPT2_HUMAN	Q15019	IYHLPDAEsDEDEDFK;IYHLPDAEsDEDEDFKEQTR	0.9759	271840	177259	223961	0.656519	0.0203907
Q15942_S259	ZYX	sp|Q15942|ZYX_HUMAN	Q15942	GPPASsPAPAPK	0.9616	14824.8	17663.8	0	0.307156	0.0205113
O15400_S129	STX7	sp|O15400|STX7_HUMAN	O15400	ASSRVsGSFPEDSSK;ASsRVsGSFPEDSSK;VsGSFPEDSSK	0.9722	46453.5	54534.1	43326.4	1.57304	0.0205201
Q9H9B1_S395	EHMT1	sp|Q9H9B1|EHMT1_HUMAN	Q9H9B1	MDGEsEEEQESVDtGEEEEGGDESDLSSESSIK	0.967	5196.47	0	0	0.20753	0.0206493
Q9H9B1_T404	EHMT1	sp|Q9H9B1|EHMT1_HUMAN	Q9H9B1	MDGEsEEEQESVDtGEEEEGGDESDLSSESSIK	0.967	5196.47	0	0	0.20753	0.0206493
O14974_S445	PPP1R12A	sp|O14974|MYPT1_HUMAN	O14974	TGsYGALAEITASK	0.9682	11316.2	9482.09	10804.9	1.26752	0.0206718
P10244_S241	MYBL2	sp|P10244|MYBB_HUMAN	P10244	EEENsEEELAAATTSK	0.973	6322.99	5006.22	4292.08	1.74103	0.0207524
Q8NI08_S208	NCOA7	sp|Q8NI08|NCOA7_HUMAN	Q8NI08	VLsSTsEEDEPGVVK	0.9663	13633.1	17001.3	16761.2	2.07873	0.0208248
Q8NI08_S211	NCOA7	sp|Q8NI08|NCOA7_HUMAN	Q8NI08	VLsSTsEEDEPGVVK	0.9662	13633.1	17001.3	16761.2	2.07873	0.0208248
A2RRP1_S473	NBAS	sp|A2RRP1|NBAS_HUMAN	A2RRP1	AGEEDEGEEDsDSDYEISAK	0.9619	12052.3	12566.8	9635.41	0.753744	0.0209015
Q5JSZ5_S388	PRRC2B	sp|Q5JSZ5|PRC2B_HUMAN	Q5JSZ5	LKFsDDEEEEEVVK	1	28734.8	26932.5	25159.5	1.48474	0.0209703
Q9H0D6_S501	XRN2	sp|Q9H0D6|XRN2_HUMAN	Q9H0D6	AEDsDsEPEPEDNVR;KAEDSDsEPEPEDNVR;KAEDsDsEPEPEDNVR;RKAEDsDsEPEPEDNVR	1	245512	283628	401668	0.624102	0.0210241
P14625_S306	HSP90B1	sp|P14625|ENPL_HUMAN	P14625	EEKEEsDDEAAVEEEEEEK;EEsDDEAAVEEEEEEK;TETVEEPMEEEEAAKEEKEEsDDEAAVEEEEEEK	1	25352.8	17917.3	11847	4.7506	0.0211617
Q9Y383_S18	LUC7L2	sp|Q9Y383|LC7L2_HUMAN	Q9Y383	AMLDQLMGTsR	0.9535	7396.05	8822.57	6007.86	0.645907	0.0212513
Q86VZ1_S324	P2RY8	sp|Q86VZ1|P2RY8_HUMAN	Q86VZ1	REsLFSAR;REsLFsAR	1	15981.8	28327.8	17317.6	0.539255	0.0213937
P33241_S252	LSP1	sp|P33241|LSP1_HUMAN	P33241	QAsIELPSMAVASTK	0.9766	117041	158453	111250	1.9819	0.0214106
Q96T58_S1382	SPEN	sp|Q96T58|MINT_HUMAN	Q96T58	DLEPGEVPsDsDEDGEHK	1	3891.04	1005.21	2291.98	0.240091	0.0215391
P19338_S34	NCL	sp|P19338|NUCL_HUMAN	P19338	EVEEDSEDEEMsEDEEDDssGEEVVIPQK;EVEEDsEDEEMsEDEEDDSSGEEVVIPQK;EVEEDsEDEEMsEDEEDDSSGEEVVIPQKK;EVEEDsEDEEMsEDEEDDsSGEEVVIPQK;EVEEDsEDEEMsEDEEDDsSGEEVVIPQKK	0.9702	25475.6	18006.3	24576.1	0.573332	0.0215497
P98175_S738	RBM10	sp|P98175|RBM10_HUMAN	P98175	GLVAAYSGESDsEEEQER;GLVAAYSGEsDsEEEQER	0.9721	27959.6	30984	30107.9	0.611252	0.0219096
P67809_S165	YBX1	sp|P67809|YBOX1_HUMAN	P67809	NYQQNYQNsESGEK;NYQQNYQNsESGEKNEGSESAPEGQAQQR;NYQQNYQNsESGEKNEGSEsAPEGQAQQR;NYQQNYQNsESGEKNEGsESAPEGQAQQR;NYQQNYQNsEsGEKNEGSESAPEGQAQQR;NYQQNyQNsESGEKNEGSESAPEGQAQQR	0.9739	64815.4	68621.6	68184.6	0.69997	0.0219883
P49736_S7	MCM2	sp|P49736|MCM2_HUMAN	P49736	AESSEsFTMASsPAQR	0.9734	15167.2	19916.2	15382.3	0.701609	0.022018
Q9BZL4_S407	PPP1R12C	sp|Q9BZL4|PP12C_HUMAN	Q9BZL4	sPVQLEEAPFSR	0.9733	11745.7	8976.33	5027.45	7.34923	0.0221059
Q9Y232_S201	CDYL	sp|Q9Y232|CDYL_HUMAN	Q9Y232	ILVPKsPVK	1	8579.77	10059	9875.05	0.689498	0.0222277
Q01970_S537	PLCB3	sp|Q01970|PLCB3_HUMAN	Q01970	sLGDEGLNR	1	17631.1	13827.9	11865.3	1.98495	0.0222297
Q13427_S716	PPIG	sp|Q13427|PPIG_HUMAN	Q13427	IRsSVEKENQK	0.931	8582.62	0	10357.1	0.293675	0.022301
P62258_S210	YWHAE	sp|P62258|1433E_HUMAN	P62258	AAFDDAIAELDTLsEESYK	0.9672	6472.93	7584.89	5292.61	1.76276	0.0225231
Q96KR1_S1054	ZFR	sp|Q96KR1|ZFR_HUMAN	Q96KR1	DsDGVDGFEAEGK;RDsDGVDGFEAEGK;RDsDGVDGFEAEGKK;RRDsDGVDGFEAEGK	1	92539.1	77831.8	81159	1.29048	0.0226326
Q8WUZ0_T111	BCL7C	sp|Q8WUZ0|BCL7C_HUMAN	Q8WUZ0	GtEPsPGGTPQPsRPVSPAGPPEGVPEEAQPPR	0.8121	0	0	8351.67	0.0858787	0.0227615
Q8N1G0_S374	ZNF687	sp|Q8N1G0|ZN687_HUMAN	Q8N1G0	LsPAtPTSEGPK	0.9648	14910.4	15904.9	11153.7	1.71155	0.0228317
Q8N1G0_T377	ZNF687	sp|Q8N1G0|ZN687_HUMAN	Q8N1G0	LsPAtPTSEGPK	0.9646	14910.4	15904.9	11153.7	1.71155	0.0228317
Q92615_S498	LARP4B	sp|Q92615|LAR4B_HUMAN	Q92615	KNsFGYR	0.9749	27347.9	25251.5	28987.4	1.32037	0.0229335
Q9UBW7_S156	ZMYM2	sp|Q9UBW7|ZMYM2_HUMAN	Q9UBW7	tNDVDFsTSSFSR	0.8934	105368	66744.4	70589.8	2.88408	0.0229437
Q9UBW7_T150	ZMYM2	sp|Q9UBW7|ZMYM2_HUMAN	Q9UBW7	tNDVDFsTSSFSR	0.8934	105368	66744.4	70589.8	2.88408	0.0229437
P55081_S118	MFAP1	sp|P55081|MFAP1_HUMAN	P55081	IVEPEVVGEsDsEVEGDAWR	1	3210.27	9185.65	4519.21	0.355455	0.0230441
Q86YS7_S295	C2CD5	sp|Q86YS7|C2CD5_HUMAN	Q86YS7	NQTYSFsPSK	0.9712	28527.4	26382.4	24884.7	1.25041	0.0230768
Q01813_S386	PFKP	sp|Q01813|PFKAP_HUMAN	Q01813	sFAGNLNTYK	0.9749	5994.56	4648.12	5406.41	1.35362	0.0231684
Q9UKE5_S707	TNIK	sp|Q9UKE5|TNIK_HUMAN	Q9UKE5	LGSQPIRAsNPDLR	0.9747	4096.96	3131.4	2961.28	0.512958	0.0232975
Q13769_S314	THOC5	sp|Q13769|THOC5_HUMAN	Q13769	ALFKPPEDSQDDEsDsDAEEEQTTK;ALFKPPEDsQDDESDsDAEEEQTTK	0.9764	16921.2	25225.2	10861.8	0.476524	0.0233039
O75822_S11	EIF3J	sp|O75822|EIF3J_HUMAN	O75822	AAAAAAAGDsDSWDADAFSVEDPVR;AAAAAAAGDsDSWDADAFSVEDPVRK	0.9605	27777.1	45815.4	28020.6	0.557674	0.0234193
Q86YV0_S857	RASAL3	sp|Q86YV0|RASL3_HUMAN	Q86YV0	DsASLPR	0.9766	48168	41853.5	45797.4	1.52313	0.0236219
Q96D71_S272	REPS1	sp|Q96D71|REPS1_HUMAN	Q96D71	RQsSSYDDPWK	0.9524	0	12487.3	0	0.219519	0.0238081
Q9BXW9_S1435	FANCD2	sp|Q9BXW9|FACD2_HUMAN	Q9BXW9	ATEDGEEDEVsAGEK	0.9723	11346.6	10634.4	8377.68	1.47536	0.0240132
Q96QH2_S484	PRAM1	sp|Q96QH2|PRAM_HUMAN	Q96QH2	sAAGLHFQDR	1	27569.9	32868.7	21061.7	0.609515	0.0240587
P20138_S307	CD33	sp|P20138|CD33_HUMAN	P20138	NDTHPTTGSAsPK	0.9647	9662.67	6077.29	12886.8	0.399715	0.0240904
P06748_S227	NPM1	sp|P06748|NPM_HUMAN	P06748	GQEsFKK	1	24991	30800.7	41172.9	2.13019	0.0240968
Q14966_S605	ZNF638	sp|Q14966|ZN638_HUMAN	Q14966	HLEAADKGHsPAQKPK	1	1776.78	1388.42	0	0.170618	0.0241946
Q13576_S16	IQGAP2	sp|Q13576|IQGA2_HUMAN	Q13576	YGsIVDDER	0.9735	26933.9	22922.5	29851.1	1.49621	0.0242657
Q76FK4_S890	NOL8	sp|Q76FK4|NOL8_HUMAN	Q76FK4	FLEtDsEEEQEEVNEK	1	28923.8	29131.1	28358.2	0.632247	0.0242959
Q76FK4_T888	NOL8	sp|Q76FK4|NOL8_HUMAN	Q76FK4	FLEtDsEEEQEEVNEK	1	28923.8	29131.1	28358.2	0.632247	0.0242959
Q9ULU4_S425	ZMYND8	sp|Q9ULU4|ZMYD8_HUMAN	Q9ULU4	RIsLSDMPR	0.9483	11031.5	8178	8234.74	1.63978	0.0243271
O43719_S702	HTATSF1	sp|O43719|HTSF1_HUMAN	O43719	LFEDDDsNEK;LFEDDDsNEKLFDEEEDSSEK;LFEDDDsNEKLFDEEEDSsEK;LFEDDDsNEKLFDEEEDsSEK	1	102750	100839	99766.3	0.802784	0.0243454
Q9Y3X0_S202	CCDC9	sp|Q9Y3X0|CCDC9_HUMAN	Q9Y3X0	sGPLEESER	0.9767	31103	22056.7	26412.4	1.60929	0.0243605
Q07955_Y202	SRSF1	sp|Q07955|SRSF1_HUMAN	Q07955	VDGPRSPsyGR;VDGPRsPsyGRSR	0.8914	15822.1	40765.2	27334.7	0.4641	0.0245001
Q9HCD5_S151	NCOA5	sp|Q9HCD5|NCOA5_HUMAN	Q9HCD5	YRDsFDGR	0.9676	9902.36	9902.36	10744	1.60514	0.0245135
Q9Y4B6_S979	DCAF1	sp|Q9Y4B6|DCAF1_HUMAN	Q9Y4B6	QKsDHGAYSQSPAIK	0.9681	7948.38	7346.54	4296.47	4.25161	0.0245209
Q76FK4_S378	NOL8	sp|Q76FK4|NOL8_HUMAN	Q76FK4	EYDsGDtDEIIAMK;NDREYDsGDtDEIIAMK	0.9731	10252.9	13883.5	8192.96	0.634486	0.0246493
Q76FK4_T381	NOL8	sp|Q76FK4|NOL8_HUMAN	Q76FK4	EYDsGDtDEIIAMK;NDREYDsGDtDEIIAMK	0.9732	10252.9	13883.5	8192.96	0.634486	0.0246493
Q9H4L5_S304	OSBPL3	sp|Q9H4L5|OSBL3_HUMAN	Q9H4L5	LHSsNPNLSTLDFGEEK	0.9631	5898.82	0	0	0.208123	0.0246534
Q58A45_T353	PAN3	sp|Q58A45|PAN3_HUMAN	Q58A45	ItPHtSPAPR	0.932	0	17576.6	0	0.217719	0.0246675
P12956_S27	XRCC6	sp|P12956|XRCC6_HUMAN	P12956	TEGDEEAEEEQEENLEAsGDYK	0.9572	6750.23	4791.14	3381.21	0.519662	0.0248892
P78362_S497	SRPK2	sp|P78362|SRPK2_HUMAN	P78362	TVsASsTGDLPK	0.9694	58839.3	61979.1	70831.4	1.24647	0.0248972
Q9UHB7_S212	AFF4	sp|Q9UHB7|AFF4_HUMAN	Q9UHB7	SKsPRDPDANWDsPSR	0.9198	7870.16	10679.6	6777.25	0.624014	0.0250605
P26038_T558	MSN	sp|P26038|MOES_HUMAN	P26038	DKYKtLR	0.9748	2510.71	1929.49	11145.8	0.0594271	0.025118
Q13129_S632	RLF	sp|Q13129|RLF_HUMAN	Q13129	sPSAIPEQNHSLNDQAK	0.9708	12454.7	14825.4	12037.2	1.35402	0.0253552
P15531_S120	NME1	sp|P15531|NDKA_HUMAN	P15531	NIIHGsDSVESAEK	0.9678	3297.03	6409.72	7115.55	0.54699	0.025466
O60293_S352	ZFC3H1	sp|O60293|ZC3H1_HUMAN	O60293	RIsTSDILSEK	0.9497	11092.9	9314.77	10127.5	2.86571	0.0255994
Q13523_S294	PRP4K	sp|Q13523|PRP4K_HUMAN	Q13523	KsRsPVDLR;SRsPVDLR;sRsPVDLR	1	244381	352451	242232	0.653716	0.0256114
P47755_S9	CAPZA2	sp|P47755|CAZA2_HUMAN	P47755	ADLEEQLsDEEK	1	10354	10344.4	10114	1.28362	0.0256763
Q9UQR1_S306	ZNF148	sp|Q9UQR1|ZN148_HUMAN	Q9UQR1	GGLLTSEEDSGFSTsPK	0.9722	14794.7	13635.1	14597.9	1.11582	0.0256948
P17275_S259	JUNB	sp|P17275|JUNB_HUMAN	P17275	DAtPPVsPINMEDQER	1	41822.9	50478.2	44410.4	1.2501	0.0259282
P17275_T255	JUNB	sp|P17275|JUNB_HUMAN	P17275	DAtPPVsPINMEDQER	1	41822.9	50478.2	44410.4	1.2501	0.0259282
O75643_S225	SNRNP200	sp|O75643|U520_HUMAN	O75643	EEAsDDDMEGDEAVVR	1	347084	285468	306776	1.31491	0.0260046
Q02241_S867	KIF23	sp|Q02241|KIF23_HUMAN	Q02241	YMLTHQELAsDGEIETK	0.961	2300.93	4577.87	1852.62	#DIV/0!	0.026061
Q9Y2X7_Y383	GIT1	sp|Q9Y2X7|GIT1_HUMAN	Q9Y2X7	SQSDLDDQHDyDSVAsDEDTDQEPLR	0.8796	18115.5	16509.4	15470.3	0.409373	0.0261141
Q6JBY9_S83	RCSD1	sp|Q6JBY9|CPZIP_HUMAN	Q6JBY9	SsPLIEK;VKSsPLIEK	0.9699	45361.5	33749.3	53487.7	3.27963	0.0263131
Q6IE81_S603	JADE1	sp|Q6IE81|JADE1_HUMAN	Q6IE81	DPLQNsPGSEGK	0.9743	11039.9	11244	12113.5	1.18121	0.0263563
O75151_S899	PHF2	sp|O75151|PHF2_HUMAN	O75151	KGsDDAPYSPTAR;KGsDDAPYsPTAR;RKGsDDAPYsPTAR	0.9749	24980.9	27632.6	26770.2	1.21667	0.0264114
Q53QZ3_S64	ARHGAP15	sp|Q53QZ3|RHG15_HUMAN	Q53QZ3	NHsQHILK	1	22317.9	23499.2	18626.8	0.521841	0.0264492
Q9H4L7_S211	SMARCAD1	sp|Q9H4L7|SMRCD_HUMAN	Q9H4L7	KLsSSsEPYEEDEFNDDQSIK;KLsSSsEPYEEDEFNDDQSIKK	0.9437	0	0	7231.49	0.197421	0.0264754
Q9H4L7_S214	SMARCAD1	sp|Q9H4L7|SMRCD_HUMAN	Q9H4L7	KLsSSsEPYEEDEFNDDQSIK;KLsSSsEPYEEDEFNDDQSIKK	0.9441	0	0	7231.49	0.197421	0.0264754
P49585_S329	PCYT1A	sp|P49585|PCY1A_HUMAN	P49585	ERsPSPSFR;ERsPsPSFR;sPSPSFR	0.9769	402437	434300	415724	1.09182	0.0267124
O75909_S329	CCNK	sp|O75909|CCNK_HUMAN	O75909	KPSPQPSsPR;KPsPQPSsPR	0.9523	92390.9	119487	115463	0.610584	0.0268358
Q9BXW6_S499	OSBPL1A	sp|Q9BXW6|OSBL1_HUMAN	Q9BXW6	sFEEEGEHLGSR	0.9767	54907.2	51393.4	52936.8	1.12245	0.0269171
Q9BW71_S372	HIRIP3	sp|Q9BW71|HIRP3_HUMAN	Q9BW71	EVsDsEAGGGPQGER	1	17778.1	30609.3	20133.8	0.613243	0.0270857
O43768_S108	ENSA	sp|O43768|ENSA_HUMAN	O43768	KsSLVTSK	0.8548	32842.1	987.234	0	0.234713	0.0271854
Q5UIP0_S1422	RIF1	sp|Q5UIP0|RIF1_HUMAN	Q5UIP0	RRsEVVESTTESQDK	0.9744	5887.19	10506.4	6551.43	2.8691	0.0272392
Q9NV56_S194	MRGBP	sp|Q9NV56|MRGBP_HUMAN	Q9NV56	VLTANsNPsSPSAAK	0.8158	0	11658	0	0.227068	0.0273679
P05388_S307	RPLP0	sp|P05388|RLA0_HUMAN	P05388	EESEEsDEDMGFGLFD;EEsEEsDEDMGFGLFD;VEAKEESEEsDEDMGFGLFD;VEAKEEsEEsDEDMGFGLFD	1	593545	584638	632266	0.639581	0.0273842
Q6JBY9_S284	RCSD1	sp|Q6JBY9|CPZIP_HUMAN	Q6JBY9	RSSEEVDGQHPAQEEVPEsPQTSGPEAENR;RSsEEVDGQHPAQEEVPEsPQTSGPEAENR;SSEEVDGQHPAQEEVPEsPQTSGPEAENR	0.9734	65103.4	98009.8	73401.5	1.78272	0.0274142
Q14181_T127	POLA2	sp|Q14181|DPOA2_HUMAN	Q14181	AIStPEtPLTK	0.9678	14578.8	20598.5	17633.4	0.615328	0.0274638
Q14181_T130	POLA2	sp|Q14181|DPOA2_HUMAN	Q14181	AIStPEtPLTK	0.968	14578.8	20598.5	17633.4	0.615328	0.0274638
P19634_S703	SLC9A1	sp|P19634|SL9A1_HUMAN	P19634	IGsDPLAYEPK	0.9744	15556.5	10242.3	12866.2	1.74935	0.0275562
Q9HDC5_S216	JPH1	sp|Q9HDC5|JPH1_HUMAN	Q9HDC5	RGsLLGsMK	1	6118.9	9275.63	4516.66	0.531204	0.0276891
Q9HDC5_S220	JPH1	sp|Q9HDC5|JPH1_HUMAN	Q9HDC5	RGsLLGsMK	1	6118.9	9275.63	4516.66	0.531204	0.0276891
Q8IV50_S33	LYSMD2	sp|Q8IV50|LYSM2_HUMAN	Q8IV50	SGsESEEAELSLSLAR	0.9569	8565.25	8708.22	11381.6	4.70806	0.0277948
Q96QH2_S204	PRAM1	sp|Q96QH2|PRAM_HUMAN	Q96QH2	sPQPELSTFPK	0.9743	15507.2	22301.7	10436.9	3.63075	0.0278717
Q13523_S431	PRP4K	sp|Q13523|PRP4K_HUMAN	Q13523	DAsPINR;DAsPINRWsPTR;ERsKDAsPINR;SKDAsPINR;SKDAsPINRWsPTR;sKDAsPINR	1	56228.4	109995	71206.5	0.506506	0.0280425
O94888_S288	UBXN7	sp|O94888|UBXN7_HUMAN	O94888	SESLIDASEDsQLEAAIR;SEsLIDASEDsQLEAAIR;sESLIDASEDsQLEAAIR	0.9746	20784.1	27418.1	6500.67	0.41259	0.0282952
Q9H307_S690	PNN	sp|Q9H307|PININ_HUMAN	Q9H307	sISESSR	0.973	7496.47	8550.1	6108.73	1.69742	0.0283735
Q7Z2W4_S378	ZC3HAV1	sp|Q7Z2W4|ZCCHV_HUMAN	Q7Z2W4	TVFsPTLPAAR	0.973	14108.7	12425.4	16239.6	1.46372	0.0283865
Q15287_S251	RNPS1	sp|Q15287|RNPS1_HUMAN	Q15287	RFsPPRR	1	0	21375.5	29119.4	0.357382	0.0284661
P07910_S233	HNRNPC	sp|P07910|HNRPC_HUMAN	P07910	NDKsEEEQSSSSVK;QAVEMKNDKsEEEQSSSSVK	0.974	60154.4	56436.9	54332.4	1.29062	0.0287429
Q9UQ35_S1878	SRRM2	sp|Q9UQ35|SRRM2_HUMAN	Q9UQ35	sRtPLISR	0.976	60119.7	93119	60291.8	0.648513	0.0289339
Q9UQ35_T1880	SRRM2	sp|Q9UQ35|SRRM2_HUMAN	Q9UQ35	sRtPLISR	0.976	60119.7	93119	60291.8	0.648513	0.0289339
Q9BRQ0_T302	PYGO2	sp|Q9BRQ0|PYGO2_HUMAN	Q9BRQ0	GGGtPDANSLAPPGK	0.9575	2969.9	3911.86	4305.9	0.658211	0.0289883
Q14155_S694	ARHGEF7	sp|Q14155|ARHG7_HUMAN	Q14155	KPsDEEFASR	0.9555	19324.4	25823.8	18522.6	1.62351	0.0293409
Q9C0C9_S87	UBE2O	sp|Q9C0C9|UBE2O_HUMAN	Q9C0C9	LIHGEDsDsEGEEEGR	1	30977.1	42960.1	46338.2	0.587156	0.0294713
Q9C0C9_S89	UBE2O	sp|Q9C0C9|UBE2O_HUMAN	Q9C0C9	LIHGEDsDsEGEEEGR	1	30977.1	42960.1	46338.2	0.587156	0.0294713
O75376_S1981	NCOR1	sp|O75376|NCOR1_HUMAN	O75376	YETPSDAIEVIsPASsPAPPQEK	0.965	0	0	0	0	0.0295888
Q9BQ52_S199	ELAC2	sp|Q9BQ52|RNZ2_HUMAN	Q9BQ52	HQPWQsPERPLSR	0.9727	12398.3	11475.1	5714.45	0.494676	0.0296132
O75151_S625	PHF2	sp|O75151|PHF2_HUMAN	O75151	LEKsPLAGNK	1	12826.2	11355.7	12423	1.44613	0.0298723
P45880_S115	VDAC2	sp|P45880|VDAC2_HUMAN	P45880	LTFDTTFsPNTGK	0.9734	8516.91	8932.56	9105.2	1.27139	0.029906
P21333_S2143	FLNA	sp|P21333|FLNA_HUMAN	P21333	VKEsITR	0.9726	8411.81	11682.1	14723.9	2.3901	0.0299699
O75995_S27	SASH3	sp|O75995|SASH3_HUMAN	O75995	SSsFKDFAK;SssFKDFAK;sSsFKDFAK	0.9675	96349.1	119502	91390.8	0.70217	0.0302272
Q14241_S125	ELOA	sp|Q14241|ELOA1_HUMAN	Q14241	SYsPDHR	0.9511	5125.24	8729.74	10824.6	4.39522	0.0302576
Q9UQ35_S333	SRRM2	sp|Q9UQ35|SRRM2_HUMAN	Q9UQ35	QPSsPYEDKDKDK	0.9514	9774.52	0	6199.42	0.282323	0.0303211
Q9H2G2_S565	SLK	sp|Q9H2G2|SLK_HUMAN	Q9H2G2	VDEDsAEDTQsNDGKEVVEVGQK	0.9703	29651.8	34812	36180.3	0.776213	0.0303749
Q5T1M5_S344	FKBP15	sp|Q5T1M5|FKB15_HUMAN	Q5T1M5	sNSLSEQLAINTSPDAVK	0.9456	20609.1	22958.6	19478	1.25685	0.0304407
Q8TDY2_S222	RB1CC1	sp|Q8TDY2|RBCC1_HUMAN	Q8TDY2	LDsLPEHEDSEK	0.9752	11793.1	8401.01	10757.2	1.66923	0.0304736
P49736_S26	MCM2	sp|P49736|MCM2_HUMAN	P49736	GNDPLTsSPGR;GNDPLTssPGR;GNDPLTssPGRSSR;RGNDPLTsSPGR;RGNDPLTssPGR	0.9731	104403	160735	109630	0.630912	0.0305544
Q9NR09_S2955	BIRC6	sp|Q9NR09|BIRC6_HUMAN	Q9NR09	VSVTTNTTDSVsDEEK	0.8474	189914	227725	244766	1.3713	0.0305839
Q13501_S272	SQSTM1	sp|Q13501|SQSTM_HUMAN	Q13501	LTPVsPESSSTEEK;LTPVsPESSsTEEK;SRLTPVsPESSSTEEK;SRLtPVsPESSSTEEK;sRLTPVsPESSSTEEK	0.9745	59521.2	56907.9	59020	1.27194	0.0307521
Q04726_S245	TLE3	sp|Q04726|TLE3_HUMAN	Q04726	yDSDGDKsDDLVVDVSNEDPATPR	0.9042	2068.65	0	0	0.0835203	0.0308932
Q04726_Y238	TLE3	sp|Q04726|TLE3_HUMAN	Q04726	yDSDGDKsDDLVVDVSNEDPATPR	0.9075	2068.65	0	0	0.0835203	0.0308932
Q9BUJ2_S512	HNRNPUL1	sp|Q9BUJ2|HNRL1_HUMAN	Q9BUJ2	NYILDQTNVYGsAQR	0.9715	9465.32	11597.2	9186.77	1.37715	0.0309235
P11274_S463	BCR	sp|P11274|BCR_HUMAN	P11274	HQDGLPYIDDsPSSsPHLSSK	0.9601	6860.11	23630.8	6936.1	0.37944	0.0309757
Q15910_T367	EZH2	sp|Q15910|EZH2_HUMAN	Q15910	LPNNSSRPStPTINVLESK;LPNNSsRPStPTINVLESK;PStPTINVLESK	0.9362	40448.8	41634.2	26830.8	1.87446	0.0310082
P30414_S347	NKTR	sp|P30414|NKTR_HUMAN	P30414	YHtPPRsR	0.9748	22118	18275.9	30140.4	0.470825	0.031414
P30414_T343	NKTR	sp|P30414|NKTR_HUMAN	P30414	YHtPPRsR	0.9752	22118	18275.9	30140.4	0.470825	0.031414
Q15154_S537	PCM1	sp|Q15154|PCM1_HUMAN	Q15154	KDEETEESEYDsEHENSEPVTNIR;KDEETEEsEYDsEHENSEPVTNIR;KDEEtEEsEYDsEHENSEPVTNIR	0.9397	10773.6	12286.6	15293.6	0.49392	0.0314422
Q14839_S308	CHD4	sp|Q14839|CHD4_HUMAN	Q14839	sSSEDDDLDVEsDFDDASINSYSVSDGSTSR	0.8281	3089.02	0	5389.92	0.341367	0.0315183
Q14839_S319	CHD4	sp|Q14839|CHD4_HUMAN	Q14839	sSSEDDDLDVEsDFDDASINSYSVSDGSTSR	0.8982	3089.02	0	5389.92	0.341367	0.0315183
Q02952_T608	AKAP12	sp|Q02952|AKA12_HUMAN	Q02952	EGVtPWAsFKK	1	3368.67	3288.03	0	0.280495	0.0315425
Q5JSZ5_S1132	PRRC2B	sp|Q5JSZ5|PRC2B_HUMAN	Q5JSZ5	VAsETHSEGSEyEELPK;VAsETHsEGSEYEELPK	0.9326	10029.8	10644.1	10072.6	1.12541	0.0315637
P16150_S336	SPN	sp|P16150|LEUK_HUMAN	P16150	GSGFPDGEGsSR	0.9742	312510	243996	278271	1.4254	0.0315738
Q9UPN9_S1119	TRIM33	sp|Q9UPN9|TRI33_HUMAN	Q9UPN9	LKsDERPVHIK	1	54159.6	46371.2	37981.2	1.64365	0.0316333
Q6PKG0_S627	LARP1	sp|Q6PKG0|LARP1_HUMAN	Q6PKG0	NTFTAWsDEESDYEIDDR;NTFTAWsDEESDyEIDDR;NTFTAWsDEEsDYEIDDR	0.975	19797.5	29909.2	15423.8	0.506424	0.0316769
Q5VUA4_T1048	ZNF318	sp|Q5VUA4|ZN318_HUMAN	Q5VUA4	TKsPKPAESPQSAtK	0.8259	3548.7	0	0	0.166652	0.0316838
Q8TAP9_S133	MPLKIP	sp|Q8TAP9|MPLKI_HUMAN	Q8TAP9	MsNELENYFK	0.9715	5296.84	6274.59	3686.63	2.52349	0.0317636
Q8N122_S859	RPTOR	sp|Q8N122|RPTOR_HUMAN	Q8N122	VLDTSSLTQsAPAsPTNK	0.975	26518.5	49361.7	37331.9	0.590311	0.0320871
O60716_S349	CTNND1	sp|O60716|CTND1_HUMAN	O60716	GSLAsLDsLRK	0.9724	6948.66	13833.5	10284.6	0.570679	0.0320885
O60716_S352	CTNND1	sp|O60716|CTND1_HUMAN	O60716	GSLAsLDsLRK	0.9725	6948.66	13833.5	10284.6	0.570679	0.0320885
P16284_S647	PECAM1	sp|P16284|PECA1_HUMAN	P16284	PAVPLLNsNNEK	1	7880.85	10557.8	8851.39	1.58379	0.032097
Q13523_S292	PRP4K	sp|Q13523|PRP4K_HUMAN	Q13523	KsRsPVDLR;sRSPVDLR;sRsPVDLR	1	237794	362726	201796	0.600427	0.0322688
Q9H6F5_S80	CCDC86	sp|Q9H6F5|CCD86_HUMAN	Q9H6F5	LQQGAGLEsPQGQPEPGAAsPQR	1	25442.3	46921.4	32738.8	0.557093	0.0323027
Q765P7_S456	MTSS2	sp|Q765P7|MTSS2_HUMAN	Q765P7	GLsLEHQK	1	10275.5	5370.88	6539.79	3.23495	0.0324695
P25788_S250	PSMA3	sp|P25788|PSA3_HUMAN	P25788	ESLKEEDEsDDDNM	0.9768	1.84441e+06	1.91645e+06	1.8048e+06	1.07172	0.0326821
Q12888_T1055	TP53BP1	sp|Q12888|TP53B_HUMAN	Q12888	SEDPPtTPIR	0.9438	44091	37582	50227.2	4.40569	0.0329518
P49792_S1400	RANBP2	sp|P49792|RBP2_HUMAN	P49792	ELVGPPLAETVFtPKTsPENVQDR	0.9297	0	0	13688.7	0.195546	0.0331769
O15164_S1025	TRIM24	sp|O15164|TIF1A_HUMAN	O15164	NESEDNKFsDDsDDDFVQPR	0.9741	32681.1	28078.1	28256.4	0.580427	0.0332491
O15164_S1028	TRIM24	sp|O15164|TIF1A_HUMAN	O15164	NESEDNKFsDDsDDDFVQPR	0.9741	32681.1	28078.1	28256.4	0.580427	0.0332491
Q13459_T1271	MYO9B	sp|Q13459|MYO9B_HUMAN	Q13459	VSPPAPGsAPEtPEDK	0.9773	123166	207266	181728	2.03514	0.0332766
O60293_S805	ZFC3H1	sp|O60293|ZC3H1_HUMAN	O60293	TSSSsPANsDVEIDGIGR	0.9662	0	8891.01	5989.06	0.360706	0.0332776
P11274_S459	BCR	sp|P11274|BCR_HUMAN	P11274	HQDGLPYIDDsPSSSPHLSSK;HQDGLPYIDDsPSSsPHLSSK;HQDGLPYIDDsPsSSPHLSSK	0.9701	6997.77	23234	7075.27	0.418366	0.0335389
Q9UDY2_S244	TJP2	sp|Q9UDY2|ZO2_HUMAN	Q9UDY2	GRsIDQDYER;sIDQDYER	0.9763	16354.6	15917.9	16221	1.1281	0.0336088
O14974_S507	PPP1R12A	sp|O14974|MYPT1_HUMAN	O14974	LAsTSDIEEK	0.9724	22415	13047.9	16372.4	2.72604	0.0336229
Q8NF50_S2077	DOCK8	sp|Q8NF50|DOCK8_HUMAN	Q8NF50	VEsQKRDsFHR	1	12690	38850.3	28080.2	0.377192	0.0336571
Q8NF50_S2082	DOCK8	sp|Q8NF50|DOCK8_HUMAN	Q8NF50	VEsQKRDsFHR	1	12690	38850.3	28080.2	0.377192	0.0336571
Q9NYV4_S332	CDK12	sp|Q9NYV4|CDK12_HUMAN	Q9NYV4	RRsSsPFLSK;RRssSPFLSK;sSsPFLSK	0.9419	19017.3	29262	13076.7	0.524131	0.0336671
Q14157_S609	UBAP2L	sp|Q14157|UBP2L_HUMAN	Q14157	RYPSSISSsPQK;RYPSsISSsPQK;RYPsSISSsPQK;YPSSISSsPQK;YPSsISSsPQK	0.9637	66527.1	67502.8	65949	0.846649	0.0336913
Q12888_S809	TP53BP1	sp|Q12888|TP53B_HUMAN	Q12888	EEKsVEYEGDLK	0.9715	10624.5	8160.16	9671.97	1.41634	0.033861
Q76N32_S478	CEP68	sp|Q76N32|CEP68_HUMAN	Q76N32	SEEEVEsDDEYLALPAR	0.9721	13306.2	14971.3	13622.3	1.26254	0.0338995
P11387_S10	TOP1	sp|P11387|TOP1_HUMAN	P11387	SGDHLHNDsQIEADFR	0.9723	4489.79	10244.6	5611.53	0.502801	0.0339381
Q9UQ35_S1984	SRRM2	sp|Q9UQ35|SRRM2_HUMAN	Q9UQ35	sRTSPVTR;sRTsPVTR;sRsRTSPVtR;sRsRTsPVTR;sRsRtSPVTR;sRtSPVTR	0.9698	314371	668427	880919	0.339033	0.0341753
Q8TDD1_S39	DDX54	sp|Q8TDD1|DDX54_HUMAN	Q8TDD1	GsDsEDGEFEIQAEDDAR	1	14994.5	20613.3	21192.6	0.460882	0.0342792
Q8TDD1_S41	DDX54	sp|Q8TDD1|DDX54_HUMAN	Q8TDD1	GsDsEDGEFEIQAEDDAR	1	14994.5	20613.3	21192.6	0.460882	0.0342792
Q6QNY0_S65	BLOC1S3	sp|Q6QNY0|BL1S3_HUMAN	Q6QNY0	VAGEAAEtDsEPEPEPEPTAAPR	0.9732	9693.88	7119.76	0	0.308011	0.034447
Q6QNY0_T63	BLOC1S3	sp|Q6QNY0|BL1S3_HUMAN	Q6QNY0	VAGEAAEtDsEPEPEPEPTAAPR	0.9732	9693.88	7119.76	0	0.308011	0.034447
O75717_S868	WDHD1	sp|O75717|WDHD1_HUMAN	O75717	NQVEEDAEDsGEADDEEKPEIHKPGQNSFSK	0.9714	3567.81	6569.79	10585.4	0.37763	0.0345383
Q5VT52_T723	RPRD2	sp|Q5VT52|RPRD2_HUMAN	Q5VT52	GPTSTSIDNIDGtPVRDER	0.9753	6441.21	9558.38	5892.18	0.650465	0.0346604
Q8TDB6_S532	DTX3L	sp|Q8TDB6|DTX3L_HUMAN	Q8TDB6	EGHETPMDIDsDDSK;LKEGHETPMDIDsDDSK	0.9731	25069.8	26373.8	23689.7	0.871914	0.0347595
Q6PCE3_S175	PGM2L1	sp|Q6PCE3|PGM2L_HUMAN	Q6PCE3	AVAGVMITAsHNR	0.9713	13685.2	11303.2	8450.15	0.637852	0.0348955
Q69YN4_S222	VIRMA	sp|Q69YN4|VIR_HUMAN	Q69YN4	EDYFEPIsPDR	0.9765	12256.5	16063.6	11024.2	1.57074	0.0349129
P29966_S170	MARCKS	sp|P29966|MARCS_HUMAN	P29966	LSGFsFK;LSGFsFKK	0.9712	7081.4	6858.98	4587.04	0.684803	0.034999
Q05519_S366	SRSF11	sp|Q05519|SRS11_HUMAN	Q05519	KLsRsPsPR	1	2632.21	32941.3	10324.9	0.274505	0.0350823
Q05519_S368	SRSF11	sp|Q05519|SRS11_HUMAN	Q05519	KLsRsPsPR	1	2632.21	32941.3	10324.9	0.274505	0.0350823
Q05519_S370	SRSF11	sp|Q05519|SRS11_HUMAN	Q05519	KLsRsPsPR	1	2632.21	32941.3	10324.9	0.274505	0.0350823
Q86YV0_S228	RASAL3	sp|Q86YV0|RASL3_HUMAN	Q86YV0	DGPPSALGsR	0.9752	92965.6	72524.5	52273.4	2.12154	0.0352497
Q13242_S204	SRSF9	sp|Q13242|SRSF9_HUMAN	Q13242	GRDsPYQSR	0.9737	259753	319345	267486	1.46488	0.0353766
Q16637_S31	SMN1	sp|Q16637|SMN_HUMAN	Q16637	GTGQsDDsDIWDDTALIK	0.971	13359.3	31725.4	15577.4	0.446362	0.0355509
P06493_T14	CDK1	sp|P06493|CDK1_HUMAN	P06493	IGEGtYGVVYK;IGEGtyGVVYK	0.9768	76336.9	104458	88158.1	0.761754	0.0356038
P49736_S4	MCM2	sp|P49736|MCM2_HUMAN	P49736	AEsSESFTMASsPAQR	0.9655	12225.3	11980.4	5167.74	7.06509	0.0356143
Q96FV9_S560	THOC1	sp|Q96FV9|THOC1_HUMAN	Q96FV9	TGEDEDEEDNDALLKENEsPDVR	0.9756	13233	9363.08	10649	0.698421	0.0356719
P13861_S80	PRKAR2A	sp|P13861|KAP2_HUMAN	P13861	GDsEsEEDEDLEVPVPSR;VADAKGDsEsEEDEDLEVPVPSR	0.9772	39052	40880.7	62461.1	0.374309	0.035678
Q8IXT5_S638	RBM12B	sp|Q8IXT5|RB12B_HUMAN	Q8IXT5	RsPTEDFR;sPTEDFR	0.9753	42712.2	41021.2	37191.1	1.1788	0.0358632
O43719_S624	HTATSF1	sp|O43719|HTSF1_HUMAN	O43719	EFDEDsDEKEEEEDTYEK;VLDEEGsEREFDEDsDEKEEEEDTYEK	0.9759	221402	272019	234707	0.796003	0.0359321
P48651_S11	PTDSS1	sp|P48651|PTSS1_HUMAN	P48651	TLsKDDVNYK	0.96	5892.5	4321.39	6100.86	2.79681	0.0359556
P28749_S1041	RBL1	sp|P28749|RBL1_HUMAN	P28749	VIAIDSDAEsPAK;VIAIDSDAEsPAKR;VIAIDsDAEsPAKR	1	12431.1	13113	14363.4	0.730335	0.0360377
P49761_S9	CLK3	sp|P49761|CLK3_HUMAN	P49761	YRsPEPDPYLSYR	0.9436	4188.1	1369.07	2928.27	0.521596	0.0363898
Q16204_S244	CCDC6	sp|Q16204|CCDC6_HUMAN	Q16204	LDQPVSAPPsPR;LDQPVsAPPsPR	1	181849	223737	202214	1.25686	0.0364157
Q9P2N6_S511	KANSL3	sp|Q9P2N6|KANL3_HUMAN	Q9P2N6	DLAFEVPERGsRPAsPAAK	1	1797.97	10509.3	5597.94	0.422747	0.0365282
Q9P2N6_S515	KANSL3	sp|Q9P2N6|KANL3_HUMAN	Q9P2N6	DLAFEVPERGsRPAsPAAK	1	1797.97	10509.3	5597.94	0.422747	0.0365282
Q9UGU0_S1322	TCF20	sp|Q9UGU0|TCF20_HUMAN	Q9UGU0	DLPsPDSR	0.9763	62954.8	52045.8	59776.7	1.39426	0.0365729
Q13322_S104	GRB10	sp|Q13322|GRB10_HUMAN	Q13322	SIQPQVsPR	0.9753	10411.7	8682.66	10680.5	0.646532	0.0366345
Q07960_S51	ARHGAP1	sp|Q07960|RHG01_HUMAN	Q07960	SSsPELVTHLK	0.9731	53558.8	42892.6	34724.1	1.62906	0.0366456
O95155_S88	UBE4B	sp|O95155|UBE4B_HUMAN	O95155	SQSSEGVSSLSSsPSNSLETQSQSLSR;SQSSEGVSSLSSsPSNSLETQSQSLsR;SQSSEGVSsLSSsPSNSLETQSQSLSR;SQSsEGVSSLSSsPSNSLETQSQSLSR	0.9683	8400.47	12585.7	10195.6	0.601239	0.0367339
Q15648_S588	MED1	sp|Q15648|MED1_HUMAN	Q15648	DRHEsVGHGEDFSK	0.959	5149.11	6250.11	6273.58	1.40897	0.036826
Q8IWA0_S782	WDR75	sp|Q8IWA0|WDR75_HUMAN	Q8IWA0	EIPEDVDMEEEKEsEDsDEENDFTEK	0.9708	16254.2	52631.7	42907	0.484727	0.0368835
O75563_S283	SKAP2	sp|O75563|SKAP2_HUMAN	O75563	KMsQDSVHHTSGDK;KMsQDsVHHTSGDK	0.9717	11539.2	13658.9	6200.11	2.97531	0.0370895
O75400_S883	PRPF40A	sp|O75400|PR40A_HUMAN	O75400	HKsDSPEsDAEREK	0.9614	1742.69	5386.62	7688.02	0.257778	0.0370909
Q6KC79_S2658	NIPBL	sp|Q6KC79|NIPBL_HUMAN	Q6KC79	AITSLLGGGsPK	0.9753	48119.8	52874.3	61254	1.33857	0.0371306
P46013_S374	MKI67	sp|P46013|KI67_HUMAN	P46013	REsVNLGK	1	23697.3	18705.4	23751.6	1.31198	0.0371363
Q05D32_S28	CTDSPL2	sp|Q05D32|CTSL2_HUMAN	Q05D32	KYsEVDDSLPSGGEK;KYsEVDDSLPSGGEKPSK	0.9667	28287.1	41406.8	25275.8	1.96118	0.0371614
P29590_S565	PML	sp|P29590|PML_HUMAN	P29590	VVVISSSEDsDAENSSSR	0.9609	7166.35	5560.75	6695.69	0.740666	0.0371875
P49756_S703	RBM25	sp|P49756|RBM25_HUMAN	P49756	FEDEDsDDVPR	1	17372.4	16301.9	13911	1.26926	0.0372401
Q09666_S5110	AHNAK	sp|Q09666|AHNK_HUMAN	Q09666	AEAPLPsPK	1	26685.4	17007.6	18188.6	1.89522	0.0372898
Q9UKV3_S825	ACIN1	sp|Q9UKV3|ACINU_HUMAN	Q9UKV3	KIsVVSATK	0.9743	12035.1	10133.4	11350.9	1.4334	0.0372948
P19338_S184	NCL	sp|P19338|NUCL_HUMAN	P19338	AAAAAPAsEDEDDEDDEDDEDDDDDEEDDSEEEAMETTPAK;AAAAAPAsEDEDDEDDEDDEDDDDDEEDDsEEEAMETTPAK;AAAAAPAsEDEDDEDDEDDEDDDDDEEDDsEEEAMETtPAK	0.9768	719651	650155	750209	0.826573	0.0373033
Q9H1B7_S659	IRF2BPL	sp|Q9H1B7|I2BPL_HUMAN	Q9H1B7	NSSsPVSPASVPGQR;NSSsPVsPASVPGQR;RNsSsPVSPASVPGQR	0.9617	6069.35	9936.12	8111.5	0.623771	0.037362
O75116_S1374	ROCK2	sp|O75116|ROCK2_HUMAN	O75116	IQQNQsIR	1	0	7897.46	0	0.0798036	0.0374828
Q9NSI8_S23	SAMSN1	sp|Q9NSI8|SAMN1_HUMAN	Q9NSI8	SSsFGNFDR	0.9735	72474.5	99776.1	90422	0.735239	0.0375994
Q8WYQ5_S271	DGCR8	sp|Q8WYQ5|DGCR8_HUMAN	Q8WYQ5	YGGDsDHPsDGETSVQPMMTK	0.969	4570.1	6796.49	3310.35	0.475452	0.0377929
Q8WYQ5_S275	DGCR8	sp|Q8WYQ5|DGCR8_HUMAN	Q8WYQ5	YGGDsDHPsDGETSVQPMMTK	0.9697	4570.1	6796.49	3310.35	0.475452	0.0377929
P05412_S73	JUN	sp|P05412|JUN_HUMAN	P05412	LAsPELER	1	11486.1	7759.07	9449.2	1.90646	0.0378088
Q9NRA8_S78	EIF4ENIF1	sp|Q9NRA8|4ET_HUMAN	Q9NRA8	SsPVESLK;SsPVESLKK;WHASLYPASGRSsPVESLK	0.9301	6789.3	4241.9	13301.7	0.469557	0.0378915
Q6P2E9_S871	EDC4	sp|Q6P2E9|EDC4_HUMAN	Q6P2E9	DsQDASAEQsDHDDEVASLASASGGFGTK;DsQDAsAEQSDHDDEVASLASASGGFGTK	0.9703	23827.7	34370	31203.5	1.55736	0.0379427
Q7Z5K2_S226	WAPL	sp|Q7Z5K2|WAPL_HUMAN	Q7Z5K2	RPESPsEIsPIK;RPEsPSEIsPIK;RPEsPSEIsPIKGSVR	0.9752	208465	281222	211925	0.73301	0.0380126
Q92608_S587	DOCK2	sp|Q92608|DOCK2_HUMAN	Q92608	SSsSVGGLSVSSR	0.9672	0	0	22999.6	0.217489	0.0381682
Q15061_S77	WDR43	sp|Q15061|WDR43_HUMAN	Q15061	LQAKEsPQR	1	9287.82	9225.98	18042.4	0.428729	0.0386032
P42566_S790	EPS15	sp|P42566|EPS15_HUMAN	P42566	sINKLDsPDPFK	1	11575.1	20083.6	15712.8	1.96943	0.0386714
Q13435_S307	SF3B2	sp|Q13435|SF3B2_HUMAN	Q13435	SSLGQsASETEEDTVSVSK;SSLGQsAsETEEDTVSVSK	0.968	9411.93	9393.96	7731.82	0.652761	0.0387348
O15117_S457	FYB1	sp|O15117|FYB1_HUMAN	O15117	SPVNEDNQDGVTHSDGAGNLDEEQDsEGETYEDIEASK	0.9558	41464.7	48235.1	32190.3	0.725583	0.0389561
Q9BPZ7_S512	MAPKAP1	sp|Q9BPZ7|SIN1_HUMAN	Q9BPZ7	RTSFsFQK	0.9743	8682.14	9373.18	7127.82	0.802794	0.0389588
Q9UNS1_S1173	TIMELESS	sp|Q9UNS1|TIM_HUMAN	Q9UNS1	QLLDsDEEQEEDEGR	1	45999	45481	43490.7	0.884107	0.0390118
Q14157_S605	UBAP2L	sp|Q14157|UBP2L_HUMAN	Q14157	RYPSsISSSPQK;RYPSsISSsPQK;RYPSsIsSSPQK;YPSsISSSPQK;YPSsISSsPQK	0.9635	51234.1	59120.8	52860	0.771549	0.039061
O75995_S37	SASH3	sp|O75995|SASH3_HUMAN	O75995	SKPsSPVVsEK	0.9247	37439	59891.8	34976.4	2.67999	0.0392323
Q13043_S414	STK4	sp|Q13043|STK4_HUMAN	Q13043	sVPGPLK	1	3405.92	3617.6	0	0.22325	0.039248
O75995_S113	SASH3	sp|O75995|SASH3_HUMAN	O75995	ALSEEMADTLEEGSASPTsPDYSLDSPGPEK;ALsEEMADTLEEGSASPTsPDYSLDSPGPEK	0.9662	7506.2	16104.9	5608.68	#DIV/0!	0.0393126
Q9BW71_S223	HIRIP3	sp|Q9BW71|HIRP3_HUMAN	Q9BW71	EsEQESEEEILAQK;SLKEsEQEsEEEILAQK;SLKEsEQEsEEEILAQKK	0.9729	99266.7	107132	88892.8	0.821589	0.0393275
Q9H1B7_S662	IRF2BPL	sp|Q9H1B7|I2BPL_HUMAN	Q9H1B7	NSSsPVsPASVPGQR;NSsSPVsPASVPGQR	0.9624	3945.11	6153.76	4735.74	0.517912	0.0393884
P21127_S752	CDK11B	sp|P21127|CD11B_HUMAN	P21127	GTsPRPPEGGLGYSQLGDDDLK	0.9669	0	0	9803.85	0.179962	0.0395838
Q08495_S26	DMTN	sp|Q08495|DEMA_HUMAN	Q08495	DSSVPGsPSSIVAK	0.9733	18076.3	17655.7	12652.2	1.48658	0.0397861
O43491_S87	EPB41L2	sp|O43491|E41L2_HUMAN	O43491	QKsYTLVVAK;sYTLVVAK	0.97	17689.3	14668.9	11556.8	1.83169	0.0399009
P18858_S141	LIG1	sp|P18858|DNLI1_HUMAN	P18858	TIQEVLEEQsEDEDR;TIQEVLEEQsEDEDREAK	0.9769	143785	124680	107731	0.769558	0.0401974
P35251_S69	RFC1	sp|P35251|RFC1_HUMAN	P35251	IIYDsDSESEETLQVK;IIYDsDsESEETLQVK	0.9641	24612.1	21989.5	27112.8	0.66999	0.0404931
Q15154_T530	PCM1	sp|Q15154|PCM1_HUMAN	Q15154	KDEEtEEsEYDsEHENSEPVTNIR	0.9405	3583.95	4102.41	0	0.204111	0.0405143
O75390_T454	CS	sp|O75390|CISY_HUMAN	O75390	SMStEGLMK	0.8876	8787.71	15911.6	10515.5	0.480999	0.0407073
Q92844_S225	TANK	sp|Q92844|TANK_HUMAN	Q92844	DEEDTsFESLSK	0.9741	12539.3	10543.7	6967.41	2.00094	0.0409099
P46019_S729	PHKA2	sp|P46019|KPB2_HUMAN	P46019	sLNLVDSPQPLLEK	0.9738	4165.1	7073.49	6123.07	1.8459	0.0413499
Q7Z6Z7_S1368	HUWE1	sp|Q7Z6Z7|HUWE1_HUMAN	Q7Z6Z7	DLsMSEEDQMMR	0.9723	5673.16	6576.48	3442.24	2.13509	0.041448
Q9H019_S238	MTFR1L	sp|Q9H019|MFR1L_HUMAN	Q9H019	ASsFADMMGILK	0.9507	0	4429.91	0	0.231596	0.0414688
P19338_S580	NCL	sp|P19338|NUCL_HUMAN	P19338	GLsEDTTEETLK	0.9688	6520.21	6476.86	4908.59	4.15726	0.0414804
Q12830_S1310	BPTF	sp|Q12830|BPTF_HUMAN	Q12830	QNsIENDIEEK	1	7262.71	6469.16	4036.73	2.00938	0.0415939
Q86U86_S10	PBRM1	sp|Q86U86|PB1_HUMAN	Q86U86	ATsPSSSVSGDFDDGHHSVSTPGPSR;ATsPSSsVSGDFDDGHHSVSTPGPSR	0.9688	53393.6	38530.1	32681.1	0.673696	0.0415993
Q7Z460_S1091	CLASP1	sp|Q7Z460|CLAP1_HUMAN	Q7Z460	NSSNTSVGsPSNTIGR	0.9726	8067.73	9218.7	7047.51	0.806483	0.0416697
P08559_S232	PDHA1	sp|P08559|ODPA_HUMAN	P08559	YGMGTsVER	0.9686	32554	27824.7	34880	0.709842	0.0416893
Q9P270_S87	SLAIN2	sp|Q9P270|SLAI2_HUMAN	Q9P270	RTsSEELR	0.8566	5553.55	13792.5	10168.9	3.73693	0.0417471
Q86YV0_S859	RASAL3	sp|Q86YV0|RASL3_HUMAN	Q86YV0	DSAsLPR	0.969	13751	18993.7	19357	0.572286	0.0418567
Q8N1F8_S387	STK11IP	sp|Q8N1F8|S11IP_HUMAN	Q8N1F8	RAsISEPSDTDPEPR	0.9715	18684.1	14849.2	18087	1.3416	0.0419038
Q05209_S449	PTPN12	sp|Q05209|PTN12_HUMAN	Q05209	sFDGNTLLNR	0.9585	5929.3	4121.65	4517.16	1.63804	0.0422065
P36915_T48	GNL1	sp|P36915|GNL1_HUMAN	P36915	EEQtDTSDGESVTHHIR;EEQtDTsDGESVTHHIR;REEQtDTSDGESVTHHIR;REEQtDTsDGESVTHHIR;REEQtDtSDGESVTHHIR	0.9723	8281.6	59778.3	24177.4	0.361701	0.0422918
Q96JM3_S632	CHAMP1	sp|Q96JM3|CHAP1_HUMAN	Q96JM3	DNQESSDAELsSSEYIK;DNQESsDAELsSSEYIK	0.9712	29550.1	33711.1	31783.6	0.811523	0.0424698
P40222_S515	TXLNA	sp|P40222|TXLNA_HUMAN	P40222	RPEGPGAQAPSsPR	0.9612	39115.4	47644	45341.6	1.2492	0.0425037
Q86U86_S14	PBRM1	sp|Q86U86|PB1_HUMAN	Q86U86	ATSPSSsVSGDFDDGHHSVSTPGPSR;ATsPSSsVSGDFDDGHHSVSTPGPSR	0.9669	42328.7	80138.5	35709.1	0.566162	0.043307
P28749_S1037	RBL1	sp|P28749|RBL1_HUMAN	P28749	VIAIDsDAEsPAKR	1	7761.97	16423.1	10455	0.558761	0.0434513
Q96T37_S659	RBM15	sp|Q96T37|RBM15_HUMAN	Q96T37	HLDRsPEsDRPR	1	0	6192.11	0	0.169871	0.0435566
P54259_S77	ATN1	sp|P54259|ATN1_HUMAN	P54259	SEEIsEsESEETNAPK	0.9437	5124.07	5294.53	5189.07	0.505543	0.0436283
P54259_S79	ATN1	sp|P54259|ATN1_HUMAN	P54259	SEEIsEsESEETNAPK	0.9437	5124.07	5294.53	5189.07	0.505543	0.0436283
P48651_S442	PTDSS1	sp|P48651|PTSS1_HUMAN	P48651	GSEDsPPK	0.9725	7185.25	18311.7	7063.16	#DIV/0!	0.0436663
P52594_T177	AGFG1	sp|P52594|AGFG1_HUMAN	P52594	GtPSQsPVVGR	0.9725	36909.1	52625.9	45685.6	0.633131	0.0438408
O75533_T223	SF3B1	sp|O75533|SF3B1_HUMAN	O75533	LSSWDQAEtPGHtPSLR	0.9729	13586.6	30750.6	8543.9	0.471559	0.044229
O75533_T227	SF3B1	sp|O75533|SF3B1_HUMAN	O75533	LSSWDQAEtPGHtPSLR	0.9728	13586.6	30750.6	8543.9	0.471559	0.044229
Q8IYB3_S713	SRRM1	sp|Q8IYB3|SRRM1_HUMAN	Q8IYB3	QsPsPSTRPIR;RQsPSPSTRPIR;RQsPSPStRPIR;RQsPsPSTRPIR	0.9762	374589	468446	318234	0.746091	0.0442293
Q5JSZ5_S1136	PRRC2B	sp|Q5JSZ5|PRC2B_HUMAN	Q5JSZ5	VASEtHsEGSEYEELPK;VAsETHsEGSEYEELPK	0.9281	10077.4	11063.4	10120.4	1.14901	0.0442412
Q96T83_S693	SLC9A7	sp|Q96T83|SL9A7_HUMAN	Q96T83	TKsSSEEVLER	0.937	6685.83	4000.75	7668.55	2.08367	0.0443996
Q9Y2W1_S237	THRAP3	sp|Q9Y2W1|TR150_HUMAN	Q9Y2W1	AsAVSELsPR	0.9738	7599.73	10369.1	12098.5	0.655517	0.0444499
P17026_S49	ZNF22	sp|P17026|ZNF22_HUMAN	P17026	sLDDKPYK	0.9767	247932	152123	257052	1.91627	0.0444776
P27361_Y204	MAPK3	sp|P27361|MK03_HUMAN	P27361	IADPEHDHTGFLTEyVATR;IADPEHDHTGFLtEyVATR	0.9675	4238.02	13235.3	6181.31	#DIV/0!	0.0448037
Q5TAQ9_S99	DCAF8	sp|Q5TAQ9|DCAF8_HUMAN	Q5TAQ9	VHDRsEEEEEEEEEEEEEQPR	1	48838.7	49058.2	43122.6	0.879016	0.0454777
Q15052_S640	ARHGEF6	sp|Q15052|ARHG6_HUMAN	Q15052	KPsEEEYVIR	0.9745	223313	204568	196186	1.22095	0.0456833
Q7Z4S6_T1664	KIF21A	sp|Q7Z4S6|KI21A_HUMAN	Q7Z4S6	NLQDGQISDtGDLGEDIASN	0.8088	5212.65	5346.42	5428.92	3.8682	0.0456889
Q14004_T871	CDK13	sp|Q14004|CDK13_HUMAN	Q14004	LYSSEESRPYtNK	0.9594	5407.46	6377.21	5757.51	0.647403	0.0457289	T: 385
Q08999_S948	RBL2	sp|Q08999|RBL2_HUMAN	Q08999	sHQNsPTELNK	0.944	5930.27	7297.44	4433.91	0.711798	0.046167
Q08999_S952	RBL2	sp|Q08999|RBL2_HUMAN	Q08999	sHQNsPTELNK	0.9437	5930.27	7297.44	4433.91	0.711798	0.046167
Q96T37_S622	RBM15	sp|Q96T37|RBM15_HUMAN	Q96T37	DGWsLDR;DGWsLDRDR	1	29627	31742	21849.3	0.701018	0.0463988
Q9HDC5_S478	JPH1	sp|Q9HDC5|JPH1_HUMAN	Q9HDC5	HSHsPAsSPKPLK	0.9078	11206.8	0	10532.8	0.401178	0.0468162
P49792_S2454	RANBP2	sp|P49792|RBP2_HUMAN	P49792	DSLITPHVsR;DSLItPHVsR	0.9742	43874.4	53485.5	36202.5	0.748013	0.046857
Q9H0W8_S53	SMG9	sp|Q9H0W8|SMG9_HUMAN	Q9H0W8	DAsEETSTSVMQK	0.975	9274.05	10377.8	8131.13	0.767928	0.0469888
P49916_S210	LIG3	sp|P49916|DNLI3_HUMAN	P49916	LTTTGQVTsPVK	0.9736	30049.5	25817.2	30362.2	1.20402	0.0471648
Q9NXG2_S86	THUMPD1	sp|Q9NXG2|THUM1_HUMAN	Q9NXG2	DQQPsGsEGEDDDAEAALK;DQQPsGsEGEDDDAEAALKK;FTDKDQQPsGsEGEDDDAEAALK;FTDKDQQPsGsEGEDDDAEAALKK	1	137557	164818	123422	0.674292	0.0475562
Q9NXG2_S88	THUMPD1	sp|Q9NXG2|THUM1_HUMAN	Q9NXG2	DQQPsGsEGEDDDAEAALK;DQQPsGsEGEDDDAEAALKK;FTDKDQQPsGsEGEDDDAEAALK;FTDKDQQPsGsEGEDDDAEAALKK	1	137557	164818	123422	0.674292	0.0475562
Q641Q2_S539	WASHC2A	sp|Q641Q2|WAC2A_HUMAN	Q641Q2	GLFsDEEDSEDLFSSQSASK;GLFsDEEDSEDLFSsQSASK	0.9746	18912.8	27255.8	28691.3	1.63317	0.047585
Q9UN86_S141	G3BP2	sp|Q9UN86|G3BP2_HUMAN	Q9UN86	YEDEVFGDsEPELDEEsEDEVEEEQEER	0.977	282320	209559	338221	0.700341	0.0483066
Q15170_S28	TCEAL1	sp|Q15170|TCAL1_HUMAN	Q15170	TDEERPPVEHsPEK	0.975	44442.4	39070	40874.2	0.832327	0.0485844
O75592_S2871	MYCBP2	sp|O75592|MYCB2_HUMAN	O75592	SKsDSYTLDPDTLR	0.9722	26097.7	24435	25038.7	0.941037	0.048603
P35236_S44	PTPN7	sp|P35236|PTN7_HUMAN	P35236	RGsNVALMLDVR	1	18513	28819.4	22825.8	0.732841	0.048651
P38159_S249	RBMX	sp|P38159|RBMX_HUMAN	P38159	DYGHsSSRDDYPSR	0.9687	9677.2	11131.8	15988.6	0.574357	0.0486676
Q9BV40_T54	VAMP8	sp|Q9BV40|VAMP8_HUMAN	Q9BV40	NKTEDLEAtSEHFK;TEDLEAtSEHFK	0.9741	20294.4	30779.6	28143.9	0.641206	0.0488756
Q9UQ35_S857	SRRM2	sp|Q9UQ35|SRRM2_HUMAN	Q9UQ35	QGSITsPQANEQSVTPQRR;QGSITsPQANEQSVtPQR;QGSITsPQANEQSVtPQRR	0.9727	105904	151242	99389.6	0.708151	0.0490397
Q9Y5B0_S395	CTDP1	sp|Q9Y5B0|CTDP1_HUMAN	Q9Y5B0	DsPRPGKPDER	1	20680.3	16964.4	10848.3	0.602826	0.0491043
P52948_T670	NUP98	sp|P52948|NUP98_HUMAN	P52948	PIPQtPESAGNK	0.9734	21848.9	20186.5	19452.5	1.55523	0.0494036
Q9UQ35_S1081	SRRM2	sp|Q9UQ35|SRRM2_HUMAN	Q9UQ35	QSHsESPSLQSK	0.834	5993.56	12173.3	0	0.329339	0.049532
Q5T8D3_S196	ACBD5	sp|Q5T8D3|ACBD5_HUMAN	Q5T8D3	AESSDsGAEsEEEEAQEEVK	0.9434	7207.64	0	7009.38	0.413373	0.0497088
Q5T8D3_S200	ACBD5	sp|Q5T8D3|ACBD5_HUMAN	Q5T8D3	AESSDsGAEsEEEEAQEEVK	0.9438	7207.64	0	7009.38	0.413373	0.0497088
Q5VT52_S374	RPRD2	sp|Q5VT52|RPRD2_HUMAN	Q5VT52	DVEDMELsDVEDDGSK	0.9766	127416	136357	147292	1.1654	0.0498694
Q96QC0_S313	PPP1R10	sp|Q96QC0|PP1RA_HUMAN	Q96QC0	VLsPTAAK;VLsPTAAKPSPFEGK	0.9757	16801.2	12733.6	14411.4	1.29764	0.0499875
P84103_S138	SRSF3	sp|P84103|SRSF3_HUMAN	P84103	ERsLsRER	1	2205395	3.36423e+06	1.70467e+06	0.625132	0.0501141
P84103_S140	SRSF3	sp|P84103|SRSF3_HUMAN	P84103	ERsLsRER	1	2205395	3.36423e+06	1.70467e+06	0.625132	0.0501141
O43432_S232	EIF4G3	sp|O43432|IF4G3_HUMAN	O43432	SPsPVLR	0.9727	4905.05	12323	6156.95	0.515293	0.0502134
O14745_S288	NHERF1	sp|O14745|NHRF1_HUMAN	O14745	sASSDTSEELNSQDSPPK;sASSDtSEELNSQDSPPK	0.8721	109595	138598	97713.3	4.0077	0.0502792
Q8TB72_S587	PUM2	sp|Q8TB72|PUM2_HUMAN	Q8TB72	REsLSTSSDLYK	0.9674	11484.7	9302.2	10532.8	0.812306	0.0504043
Q9NYF8_S268	BCLAF1	sp|Q9NYF8|BCLF1_HUMAN	Q9NYF8	NTPSQHSHSIQHsPER;NTPsQHSHSIQHsPER;NtPSQHSHSIQHsPER;NtPsQHSHSIQHsPER	0.9855	36527.1	71211.5	53471.7	0.524116	0.0505676
P19338_T214	NCL	sp|P19338|NUCL_HUMAN	P19338	AAAAAPASEDEDDEDDEDDEDDDDDEEDDsEEEAMEttPAK;AAAAAPAsEDEDDEDDEDDEDDDDDEEDDsEEEAMETtPAK	0.9726	12110.2	6032.29	7410.38	0.415645	0.0505753
Q9NYF8_S385	BCLAF1	sp|Q9NYF8|BCLF1_HUMAN	Q9NYF8	AEGEWEDQEALDYFsDK;AEGEWEDQEALDYFsDKESGK;AEGEWEDQEALDYFsDKEsGK;AEGEWEDQEALDYFsDKEsGKQK;AEGEWEDQEALDyFsDKESGKQK	0.9745	67797.2	70923	55539.2	0.647008	0.0506453
P16401_T9	H1-5	sp|P16401|H15_HUMAN	P16401	SETAPAEtATPAPVEKsPAK;SETAPAEtATPAPVEKsPAKK	0.9444	20403.3	16822.5	0	0.410805	0.0506565
Q92619_S23	ARHGAP45	sp|Q92619|HMHA1_HUMAN	Q92619	AGsPSPQPSGELPR;AGsPsPQPSGELPR	0.9758	45265.7	33867	52586.3	0.689795	0.0506913
Q9NVU0_S162	POLR3E	sp|Q9NVU0|RPC5_HUMAN	Q9NVU0	EAANEAGDssQDEAEDDVK	1	1846.82	2366.72	6182.04	0.46644	0.0507639
P38398_S395	BRCA1	sp|P38398|BRCA1_HUMAN	P38398	SDELLGsDDSHDGESEsNAK;SDELLGsDDSHDGEsESNAK;SDELLGsDDsHDGESESNAK	0.955	3942.58	5821.51	4196.26	0.506255	0.0512933
Q96GM8_S5	TOE1	sp|Q96GM8|TOE1_HUMAN	Q96GM8	AADsDDGAVSAPAASDGGVSK	0.9763	51900.9	45466.5	50351	1.14437	0.0512997
Q5JTV8_S156	TOR1AIP1	sp|Q5JTV8|TOIP1_HUMAN	Q5JTV8	DSHssEEDEASSQTDLSQTISK	0.9721	7626.83	117367	94957.3	0.438052	0.0513996
Q08495_S11	DMTN	sp|Q08495|DEMA_HUMAN	Q08495	QPLTsPGSVsPSR	0.7554	4467.1	5578.55	4356.36	0.795497	0.0515337
Q08495_S16	DMTN	sp|Q08495|DEMA_HUMAN	Q08495	QPLTsPGSVsPSR	0.7954	4467.1	5578.55	4356.36	0.795497	0.0515337
O43399_S166	TPD52L2	sp|O43399|TPD54_HUMAN	O43399	NSATFKsFEDR;NsATFKsFEDR	0.9744	106999	101486	75931.5	0.757505	0.051708
O43768_S67	ENSA	sp|O43768|ENSA_HUMAN	O43768	YFDsGDYNMAK	0.9729	9294.44	8975.21	7711.18	0.714788	0.0517255
Q5JTD0_S545	TJAP1	sp|Q5JTD0|TJAP1_HUMAN	Q5JTD0	KDsLTQAQEQGNLLN	0.9699	16438.8	19181.8	15305.2	0.762988	0.0517425
Q99549_S164	MPHOSPH8	sp|Q99549|MPP8_HUMAN	Q99549	QREEKsPDDLK	1	5416.73	9291.92	10296	0.539321	0.051789
Q9UQ35_S1982	SRRM2	sp|Q9UQ35|SRRM2_HUMAN	Q9UQ35	sRsRTSPVtR;sRsRTsPVTR;sRsRtSPVTR	0.9371	4558.73	26412.6	9267.15	0.195715	0.0520486
Q9UKV3_S216	ACIN1	sp|Q9UKV3|ACINU_HUMAN	Q9UKV3	SSSISEEKGDsDDEKPR;SSSIsEEKGDsDDEKPR;SSsISEEKGDsDDEKPR	0.9741	118994	180870	159598	0.749151	0.0520691
Q9NZ63_S15	C9orf78	sp|Q9NZ63|TLS1_HUMAN	Q9NZ63	RGDsEsEEDEQDSEEVR;RRGDsEsEEDEQDSEEVR	0.9772	18431.1	30677.5	18986.3	0.55193	0.0523515
Q9NZ63_S17	C9orf78	sp|Q9NZ63|TLS1_HUMAN	Q9NZ63	RGDsEsEEDEQDSEEVR;RRGDsEsEEDEQDSEEVR	0.9772	18431.1	30677.5	18986.3	0.55193	0.0523515
Q04726_S203	TLE3	sp|Q04726|TLE3_HUMAN	Q04726	ESSANNSVsPSESLR	0.9757	29468.8	32294.1	32660.6	1.27107	0.0525121
P19338_T121	NCL	sp|P19338|NUCL_HUMAN	P19338	ALVAtPGKK	1	6028.31	4150.32	8189.18	0.632509	0.0525805
Q8WWM7_S339	ATXN2L	sp|Q8WWM7|ATX2L_HUMAN	Q8WWM7	EsPSLASR;QGSGREsPSLASR	0.9759	19730.4	16148	18367.1	0.812704	0.0526354
P24386_S651	CHM	sp|P24386|RAE1_HUMAN	P24386	ESTNLGNLEEsSE	0.9652	4190.33	21949.1	20944.4	#DIV/0!	0.052713
Q9UEY8_S693	ADD3	sp|Q9UEY8|ADDG_HUMAN	Q9UEY8	TPsFLKK	0.9745	34286.6	24661.8	30960.7	0.668014	0.052766
P42167_T160	TMPO	sp|P42167|LAP2B_HUMAN	P42167	SStPLPTISSSAENTR;SStPLPTISSsAENTR;SstPLPTISSSAENTR;sStPLPTISSSAENTR	0.9712	80347.4	95957	106575	0.793443	0.0529552
Q9Y2X7_S388	GIT1	sp|Q9Y2X7|GIT1_HUMAN	Q9Y2X7	SQSDLDDQHDYDSVAsDEDTDQEPLR;SQSDLDDQHDYDsVAsDEDTDQEPLR;SQSDLDDQHDyDSVAsDEDTDQEPLR	0.9722	21479.7	19498.6	14764	0.543993	0.0531595
Q13469_S330	NFATC2	sp|Q13469|NFAC2_HUMAN	Q13469	TSPDPsPVSAAPSK;TsPDPsPVSAAPSK	0.9505	10162.3	11429.2	11205.2	0.757573	0.053239
Q6VMQ6_S477	ATF7IP	sp|Q6VMQ6|MCAF1_HUMAN	Q6VMQ6	MESSFGsPSK;MESSFGsPSKQESSESLPK	0.9516	9249.31	6923.87	5638.99	1.70684	0.0534114
O75533_T244	SF3B1	sp|O75533|SF3B1_HUMAN	O75533	GSEtPGAtPGSK	0.9718	5874.8	36470.4	0	0.268268	0.0534169
Q05209_S435	PTPN12	sp|Q05209|PTN12_HUMAN	Q05209	NLsFEIK	1	31182.8	33146	41218.4	1.32641	0.0534202
Q96JY6_T126	PDLIM2	sp|Q96JY6|PDLI2_HUMAN	Q96JY6	SSYSSPtSLsPR	0.9222	14809.7	3371.26	18075.6	#DIV/0!	0.053482
P28290_S92	ITPRID2	sp|P28290|ITPI2_HUMAN	P28290	TPLGAsLDEQSSSTLK	0.9686	9808.24	8795.32	12919.9	1.50199	0.0536195
Q9Y608_S320	LRRFIP2	sp|Q9Y608|LRRF2_HUMAN	Q9Y608	NSASATTPLsGNSSR;NSASATTPLsGNSsR	0.973	20857.7	21602.4	23190.7	0.596012	0.0536405
Q9H0H5_S203	RACGAP1	sp|Q9H0H5|RGAP1_HUMAN	Q9H0H5	sIGSAVDQGNESIVAK	0.9727	17496.5	6990.35	6836.36	12.7112	0.0539227
Q9H1E3_S58	NUCKS1	sp|Q9H1E3|NUCKS_HUMAN	Q9H1E3	NSQEDsEDSEDKDVK;NSQEDsEDsEDKDVK	0.9684	18256	17917.4	20255.1	0.663226	0.0539693
P46087_S67	NOP2	sp|P46087|NOP2_HUMAN	P46087	TNKsPEAKPLPGK	0.9673	5382.59	5975.01	11874.6	0.572188	0.0539737
Q9ULH0_S1521	KIDINS220	sp|Q9ULH0|KDIS_HUMAN	Q9ULH0	LPsDEDEsGTEESDNTPLLK	0.9502	7107.54	8476.92	5690.16	0.445551	0.0540544
Q9ULH0_S1526	KIDINS220	sp|Q9ULH0|KDIS_HUMAN	Q9ULH0	LPsDEDEsGTEESDNTPLLK	0.9495	7107.54	8476.92	5690.16	0.445551	0.0540544
Q5SW79_S1205	CEP170	sp|Q5SW79|CE170_HUMAN	Q5SW79	ANsISRLsDSK	0.9557	17094.6	14100.6	12520.3	1.45019	0.0541682
Q5SW79_S1210	CEP170	sp|Q5SW79|CE170_HUMAN	Q5SW79	ANsISRLsDSK	0.9562	17094.6	14100.6	12520.3	1.45019	0.0541682
Q16637_S28	SMN1	sp|Q16637|SMN_HUMAN	Q16637	GTGQsDDSDIWDDTALIK;GTGQsDDsDIWDDTALIK	0.9709	22068.6	35746.6	22545.9	0.654639	0.054267
Q9BSJ6_S16	PIMREG	sp|Q9BSJ6|PIMRE_HUMAN	Q9BSJ6	sLQHQEQLEDSK	0.9407	11723.2	10389.4	19504.5	4.76999	0.0543074
Q92794_S941	KAT6A	sp|Q92794|KAT6A_HUMAN	Q92794	RLsEGVEPWR	1	7680.11	5834.59	3715.57	2.17001	0.0543472
P0DPB5_Y103	POLR1D	sp|P0DPB5|RPC22_HUMAN	P0DPB5	GSASySPPR	0.9263	13232.6	0	0	0.255075	0.054354
Q92538_S1781	GBF1	sp|Q92538|GBF1_HUMAN	Q92538	AASSsSPGsPVASSPSR	0.9704	28723	40881.8	32582.6	1.43162	0.054464
P15880_T278	RPS2	sp|P15880|RS2_HUMAN	P15880	THtRVSVQR	0.7525	0	0	0	0	0.05498
Q2NKX8_S1028	ERCC6L	sp|Q2NKX8|ERC6L_HUMAN	Q2NKX8	IVsDGEDEDDSFK	0.9714	6945.47	5836.19	4709.57	1.45155	0.055046
Q96T60_T118	PNKP	sp|Q96T60|PNKP_HUMAN	Q96T60	TPESQPDtPPGTPLVSQDEK	0.9724	10224.3	11751	5741.04	0.581749	0.0550791
P78559_S2022	MAP1A	sp|P78559|MAP1A_HUMAN	P78559	ELSSPIsPK;ELSsPIsPK;ELsSPIsPK	0.9756	21252.9	20701	21012.9	1.26306	0.0551087
Q14C86_S902	GAPVD1	sp|Q14C86|GAPD1_HUMAN	Q14C86	SRsSDIVSSVR;sSDIVSSVR	0.9727	37488.4	25389.8	27841.8	1.5955	0.0552086
P07910_S253	HNRNPC	sp|P07910|HNRPC_HUMAN	P07910	MEsEGGADDSAEEGDLLDDDDNEDRGDDQLELIKDDEK;MEsEGGADDsAEEGDLLDDDDNEDR;MEsEGGADDsAEEGDLLDDDDNEDRGDDQLELIK;MEsEGGADDsAEEGDLLDDDDNEDRGDDQLELIKDDEK	1	151777	174209	74195.6	0.521671	0.0555677
P13807_S653	GYS1	sp|P13807|GYS1_HUMAN	P13807	HSsPHQsEDEEDPR	0.9621	9689.11	28383.3	19620.1	0.306678	0.0557046
P13807_S657	GYS1	sp|P13807|GYS1_HUMAN	P13807	HSsPHQsEDEEDPR	0.9622	9689.11	28383.3	19620.1	0.306678	0.0557046
Q9C0I1_S564	MTMR12	sp|Q9C0I1|MTMRC_HUMAN	Q9C0I1	QLsLPLTQSK	0.9755	7865.82	11237.2	6380.78	0.671385	0.0558591
Q7Z4V5_S625	HDGFL2	sp|Q7Z4V5|HDGR2_HUMAN	Q7Z4V5	GESAEDKEHEEGRDsEEGPR	0.9759	16337.2	19887.1	14832.8	0.653039	0.0559595
P46013_S3041	MKI67	sp|P46013|KI67_HUMAN	P46013	GKsSEPVVIMK	0.9716	24683.2	14140.9	10327.3	3.35751	0.0559995
Q09666_T4430	AHNAK	sp|Q09666|AHNK_HUMAN	Q09666	GPSLDIDtPDVNIEGPEGK	0.9637	4404.07	7645.31	7374.16	2.88742	0.056169
Q9NYV4_S334	CDK12	sp|Q9NYV4|CDK12_HUMAN	Q9NYV4	RRsSsPFLSK;SssPFLSK;sSsPFLSK	0.9552	14704.7	24034	10314.6	0.52136	0.0561823
Q09666_S5739	AHNAK	sp|Q09666|AHNK_HUMAN	Q09666	GGVTGSPEASISGsKGDLK;GGVTGsPEASISGsKGDLK	0.938	4145.58	3175.95	0	0.419304	0.0562181
Q5VUA4_S527	ZNF318	sp|Q5VUA4|ZN318_HUMAN	Q5VUA4	sFPDIEDEEK	1	11585.9	16951.8	16526.5	1.45295	0.0562311
Q8N3X1_S499	FNBP4	sp|Q8N3X1|FNBP4_HUMAN	Q8N3X1	IDENsDKEMEVEEsPEK;IDENsDKEMEVEEsPEKIK	1	26953	32807.3	31415.3	0.85796	0.0564765
Q8N3X1_S508	FNBP4	sp|Q8N3X1|FNBP4_HUMAN	Q8N3X1	IDENsDKEMEVEEsPEK;IDENsDKEMEVEEsPEKIK	1	26953	32807.3	31415.3	0.85796	0.0564765
O94804_S438	STK10	sp|O94804|STK10_HUMAN	O94804	QVAEQGGDLsPAANR	1	107679	99926.1	99731	0.749041	0.0564896
P06748_Y67	NPM1	sp|P06748|NPM_HUMAN	P06748	DELHIVEAEAMNyEGSPIK	0.9148	127664	169398	138092	1.97524	0.0565332
B2RUZ4_S22	SMIM1	sp|B2RUZ4|SMIM1_HUMAN	B2RUZ4	DGVsLGAVSSTEEASR;DGVsLGAVSsTEEASR;DGVsLGAVsSTEEASR	0.9723	28251.5	28557.8	33314.9	1.18853	0.0565461
Q86WC4_S333	OSTM1	sp|Q86WC4|OSTM1_HUMAN	Q86WC4	SSTSFANIQENsN	0.9731	10022.2	15522.1	15344.4	1.56399	0.0569703
Q09666_S135	AHNAK	sp|Q09666|AHNK_HUMAN	Q09666	LKsEDGVEGDLGETQSR	0.9766	74469.9	57924	56583.6	1.42896	0.056996
Q86WR7_S43	PROSER2	sp|Q86WR7|PRSR2_HUMAN	Q86WR7	sFTLDDESLK	0.9709	7792.98	5465.47	5762.93	1.4945	0.0570056
Q9UKY7_S107	CDV3	sp|Q9UKY7|CDV3_HUMAN	Q9UKY7	VQAMQISsEKEEDDNEKR	0.9579	0	0	6215.09	0.260267	0.0570134
O60841_S135	EIF5B	sp|O60841|IF2P_HUMAN	O60841	VEMYsGsDDDDDFNK;VEMYsGsDDDDDFNKLPK	0.9667	10852	20784.6	18212.7	0.539729	0.0571902
O60841_S137	EIF5B	sp|O60841|IF2P_HUMAN	O60841	VEMYsGsDDDDDFNK;VEMYsGsDDDDDFNKLPK	0.9667	10852	20784.6	18212.7	0.539729	0.0571902
Q9Y6R4_S1252	MAP3K4	sp|Q9Y6R4|M3K4_HUMAN	Q9Y6R4	HSsPTEERDEPAYPR	0.96	12238	12681.9	14056.8	2.95423	0.0573069
P35659_S32	DEK	sp|P35659|DEK_HUMAN	P35659	EEsEEEEDEDDEEEEEEEK;EEsEEEEDEDDEEEEEEEKEK;EEsEEEEDEDDEEEEEEEKEKsLIVEGK;EPEMPGPREEsEEEEDEDDEEEEEEEKEK	1	189347	196146	209224	0.831101	0.0575316
Q8TEM1_T1844	NUP210	sp|Q8TEM1|PO210_HUMAN	Q8TEM1	DLAVPAALtPR	1	15880.7	14966.6	16047.5	1.10223	0.0577386
P15408_S120	FOSL2	sp|P15408|FOSL2_HUMAN	P15408	DEQLsPEEEEK	1	14107.4	12133.3	10499.7	1.35309	0.0577669
Q96CW1_T156	AP2M1	sp|Q96CW1|AP2M1_HUMAN	Q96CW1	EEQSQITSQVtGQIGWR	0.9737	0	9631.73	4624.92	0.363464	0.0577731
O75995_S42	SASH3	sp|O75995|SASH3_HUMAN	O75995	SKPSsPVVsEK;SKPsSPVVsEK;sKPSSPVVsEKEFNLDDNIPEDDSGVPTPEDAGK	0.9604	44811.5	76065.4	42296.2	2.43289	0.057894
P04150_S134	NR3C1	sp|P04150|GCR_HUMAN	P04150	STsVPENPK	0.9566	12034.9	10264.8	23013.5	3.5395	0.0579716
P28482_T185	MAPK1	sp|P28482|MK01_HUMAN	P28482	VADPDHDHTGFLtEyVATR	0.9728	9708.01	29051.2	11484.8	37.1719	0.0579953
Q15942_S344	ZYX	sp|Q15942|ZYX_HUMAN	Q15942	sPGAPGPLTLK	0.9769	54295.9	77197.1	57247.2	1.48825	0.0581787
Q99959_S151	PKP2	sp|Q99959|PKP2_HUMAN	Q99959	LEIsPDSsPER	0.9677	7967.07	8197.92	6163.81	0.808383	0.058715
Q99959_S155	PKP2	sp|Q99959|PKP2_HUMAN	Q99959	LEIsPDSsPER	0.9676	7967.07	8197.92	6163.81	0.808383	0.058715
Q86Y82_S139	STX12	sp|Q86Y82|STX12_HUMAN	Q86Y82	AGsRLsAEER	1	18455.2	35415.6	26358.5	0.645929	0.0589048
Q86Y82_S142	STX12	sp|Q86Y82|STX12_HUMAN	Q86Y82	AGsRLsAEER	1	18455.2	35415.6	26358.5	0.645929	0.0589048
Q02880_S1461	TOP2B	sp|Q02880|TOP2B_HUMAN	Q02880	SEDDsAKFDsNEEDSASVFSPSFGLK	0.9647	3285.85	18651	13303	0.470391	0.0589551
P42696_S14	RBM34	sp|P42696|RBM34_HUMAN	P42696	KRsVQEGENPDDGVR;sVQEGENPDDGVR	1	30601.9	35793.7	34119.7	1.22331	0.0589573
Q9UBW5_S280	BIN2	sp|Q9UBW5|BIN2_HUMAN	Q9UBW5	TATVSSPLTSPTsPSTLSLK;TATVSsPLTSPTsPSTLSLK	0.9563	14306.9	30804.6	19241.8	2.48998	0.0590132
Q9UQ35_S534	SRRM2	sp|Q9UQ35|SRRM2_HUMAN	Q9UQ35	sRsPQRPGWSR	0.9756	34602.9	56696.3	8678.96	0.442389	0.0592575
Q9BX63_S1237	BRIP1	sp|Q9BX63|FANCJ_HUMAN	Q9BX63	NFKPsPSK	0.9716	9236.85	8483.54	9704.24	0.902035	0.0593153
P11274_S354	BCR	sp|P11274|BCR_HUMAN	P11274	VsPSPTTYR	0.9758	17991.9	12392.9	13695.6	1.4512	0.0593953
Q09666_S177	AHNAK	sp|Q09666|AHNK_HUMAN	Q09666	DIDISsPEFK	0.972	54398.7	51942.9	68367.8	1.3463	0.0596676
Q12968_S247	NFATC3	sp|Q12968|NFAC3_HUMAN	Q12968	sSVTDENWLSPR	0.9236	13650.2	13777.1	10690.1	0.811815	0.0597232
Q6P6C2_S361	ALKBH5	sp|Q6P6C2|ALKB5_HUMAN	Q6P6C2	GsFSSENYWR;RGsFSSENYWR	0.9707	7101.34	9017.56	5835.2	1.49214	0.0597908
Q13501_S266	SQSTM1	sp|Q13501|SQSTM_HUMAN	Q13501	sRLTPVsPESSSTEEK	0.8313	57664.4	57692.2	56811.1	2.3196	0.0598341
Q6UWD8_T116	C16orf54	sp|Q6UWD8|CP054_HUMAN	Q6UWD8	APEPPTQVGtLEAR	0.9676	0	6940.99	4958.47	0.356841	0.0598937
P13224_S191	GP1BB	sp|P13224|GP1BB_HUMAN	P13224	LsLTDPLVAER	0.9753	30413.9	39737.8	39993.7	1.31377	0.0600305
Q14680_S529	MELK	sp|Q14680|MELK_HUMAN	Q14680	VFGsLER	1	5859.39	6119.91	5091.53	0.843292	0.0602617
P50749_T143	RASSF2	sp|P50749|RASF2_HUMAN	P50749	tRSDVGVR	0.9125	2257.25	0	3669.41	0.115922	0.0604704
P67809_Y162	YBX1	sp|P67809|YBOX1_HUMAN	P67809	NYQQNyQNsESGEKNEGSESAPEGQAQQR	0.8666	4747.47	0	8346.16	0.122038	0.0604848
Q15154_S93	PCM1	sp|Q15154|PCM1_HUMAN	Q15154	YMSQMsVPEQAELEK	0.9708	10133.1	10024.2	8351.49	1.44959	0.0606086
Q3L8U1_S2075	CHD9	sp|Q3L8U1|CHD9_HUMAN	Q3L8U1	TLIKsEPVsPK	0.9744	12285.3	10211.9	10128.4	0.78693	0.0606695
Q3L8U1_S2079	CHD9	sp|Q3L8U1|CHD9_HUMAN	Q3L8U1	TLIKsEPVsPK	0.9744	12285.3	10211.9	10128.4	0.78693	0.0606695
Q9UQ35_S1188	SRRM2	sp|Q9UQ35|SRRM2_HUMAN	Q9UQ35	DKFsPFPVQDRPESSLVFK	0.9721	2981.95	8532.1	5661.89	3.68927	0.0612979
P17812_S575	CTPS1	sp|P17812|PYRG1_HUMAN	P17812	DTYSDRsGSSsPDSEITELK;SGSSsPDSEITELK;SGSssPDSEITELK;SGsSsPDSEITELK;sGSSsPDSEITELK	0.9737	66567.4	81086.4	66232.9	0.7891	0.0613703
Q8NC56_S134	LEMD2	sp|Q8NC56|LEMD2_HUMAN	Q8NC56	RAsVRGssEEDEDAR	1	2967.68	5962.54	3122.97	0.396155	0.0614282
Q8NC56_S138	LEMD2	sp|Q8NC56|LEMD2_HUMAN	Q8NC56	RAsVRGssEEDEDAR	1	2967.68	5962.54	3122.97	0.396155	0.0614282
Q8NC56_S139	LEMD2	sp|Q8NC56|LEMD2_HUMAN	Q8NC56	RAsVRGssEEDEDAR	1	2967.68	5962.54	3122.97	0.396155	0.0614282
Q13459_S1267	MYO9B	sp|Q13459|MYO9B_HUMAN	Q13459	VSPPAPGsAPETPEDK;VSPPAPGsAPEtPEDK	0.9773	112439	165765	160033	1.48416	0.0614738
Q96S55_S75	WRNIP1	sp|Q96S55|WRIP1_HUMAN	Q96S55	RLsESSALK	0.9699	55547.9	44671.3	55210.3	1.30003	0.0620731
Q09666_S216	AHNAK	sp|Q09666|AHNK_HUMAN	Q09666	LPSGSGAAsPTGSAVDIR;LPSGsGAAsPTGSAVDIR;LPsGSGAAsPTGSAVDIR	0.9709	39574.5	71829	59789.6	1.73549	0.0622734
Q9H019_S103	MTFR1L	sp|Q9H019|MFR1L_HUMAN	Q9H019	NAsVPNLR	1	52371.5	50739.2	45201.6	0.784354	0.0624331
Q6P1L5_S273	FAM117B	sp|Q6P1L5|F117B_HUMAN	Q6P1L5	SAsWGSTDQLK	0.9534	0	4382.81	3091.52	0.416525	0.062541
P52594_S181	AGFG1	sp|P52594|AGFG1_HUMAN	P52594	GTPSQsPVVGR;GtPSQsPVVGR	0.973	49959.2	53083.1	56725.9	0.743125	0.062542
Q92576_S122	PHF3	sp|Q92576|PHF3_HUMAN	Q92576	DKVEENsVRSPR	0.9489	9226.2	0	20185.1	0.366414	0.0625633
Q9H0D6_T478	XRN2	sp|Q9H0D6|XRN2_HUMAN	Q9H0D6	MQNNSSPSISPNtSFTSDGSPSPLGGIK	0.8206	3979.06	15710.6	4721.18	0.290395	0.062579
P26038_S407	MSN	sp|P26038|MOES_HUMAN	P26038	EALLQAsR	1	17726	11308.1	11507.8	1.9441	0.0627054
P07814_S883	EPRS1	sp|P07814|SYEP_HUMAN	P07814	EYIPGQPPLSQssDSSPTR	0.8543	52247	59348	0	0.434859	0.062722
P30291_S165	WEE1	sp|P30291|WEE1_HUMAN	P30291	RsPRPDHPGtPPHK;sPRPDHPGtPPHK	1	4251.27	21641.3	10274.8	0.437629	0.0628702
P30291_T173	WEE1	sp|P30291|WEE1_HUMAN	P30291	RsPRPDHPGtPPHK;sPRPDHPGtPPHK	1	4251.27	21641.3	10274.8	0.437629	0.0628702
Q8WWQ0_S1315	PHIP	sp|Q8WWQ0|PHIP_HUMAN	Q8WWQ0	AQsYDIQAWK	0.9733	16324.2	18031.2	14989.8	1.67717	0.0629698
P46379_S973	BAG6	sp|P46379|BAG6_HUMAN	P46379	AsPEPQRENAsPAPGTTAEEAMSR;ENAsPAPGTTAEEAMSR	0.9763	19764.1	26615.3	27392	0.772899	0.0634067
Q9BQG0_S11	MYBBP1A	sp|Q9BQG0|MBB1A_HUMAN	Q9BQG0	DPAQPMsPGEATQSGAR	0.9751	39290.6	40156.4	42731.6	1.11532	0.0635839
Q8IWA0_S779	WDR75	sp|Q8IWA0|WDR75_HUMAN	Q8IWA0	EIPEDVDMEEEKEsEDSDEENDFtEK;EIPEDVDMEEEKEsEDsDEENDFTEK	0.9708	20579.3	54525.6	48272.6	0.527695	0.0636162
P68431_S29	H3C1	sp|P68431|H31_HUMAN	P68431	KsAPATGGVK	0.974	3669.94	7271.24	6034.75	2.89348	0.0639081
Q9BZF1_S14	OSBPL8	sp|Q9BZF1|OSBL8_HUMAN	Q9BZF1	MEGGLADGEPDRTsLLGDSK	0.939	6495.39	7148.04	5940.59	1.42104	0.0639221
Q9NX40_S123	OCIAD1	sp|Q9NX40|OCAD1_HUMAN	Q9NX40	RSsPPGHYYQK	0.9709	6894.98	15408.3	2128.4	0.43976	0.0639837
Q96T58_S1918	SPEN	sp|Q96T58|MINT_HUMAN	Q96T58	SVYATMGDHENRsPVKEPVEQPR	0.9587	0	4999.26	0	0.244307	0.0643671
Q9UGU0_S1310	TCF20	sp|Q9UGU0|TCF20_HUMAN	Q9UGU0	sIPKRDsSK	0.9014	17580.7	0	5379.17	0.150617	0.064437
Q9UGU0_S1316	TCF20	sp|Q9UGU0|TCF20_HUMAN	Q9UGU0	sIPKRDsSK	0.9003	17580.7	0	5379.17	0.150617	0.064437
Q13017_S1173	ARHGAP5	sp|Q13017|RHG05_HUMAN	Q13017	RTHsDAsDDEAFTTSK;THsDAsDDEAFTTSK	0.9713	20415.3	23293.8	24149	0.847526	0.0645821
P35611_S358	ADD1	sp|P35611|ADDA_HUMAN	P35611	SPGsPVGEGTGSPPK	0.9733	54512	44361.7	54384.2	1.25535	0.0647032
Q99490_S648	AGAP2	sp|Q99490|AGAP2_HUMAN	Q99490	RTsLFANR;TsLFANR	0.9527	18899.8	19297.8	16060.7	0.672363	0.0647583
P18583_S1769	SON	sp|P18583|SON_HUMAN	P18583	SAAsPVVSSMPER	0.9653	13680.7	15757.3	16122.4	1.19419	0.0648006
Q9UQR0_S590	SCML2	sp|Q9UQR0|SCML2_HUMAN	Q9UQR0	SVPGTTSSPLVGDIsPK	0.9736	8706.73	16210.4	12619.2	1.83455	0.064997
Q7L7X3_S965	TAOK1	sp|Q7L7X3|TAOK1_HUMAN	Q7L7X3	NsPQALR	1	12762.5	19250.2	21032.5	0.707017	0.0651251
Q9NPI6_T531	DCP1A	sp|Q9NPI6|DCP1A_HUMAN	Q9NPI6	ASSPsPLTIGtPESQR	0.9749	5548.81	9930.07	8537.61	0.659095	0.0651567
Q99733_S125	NAP1L4	sp|Q99733|NP1L4_HUMAN	Q99733	EFITGDVEPTDAESEWHsENEEEEK;REFITGDVEPTDAESEWHsENEEEEK	0.9743	222968	234504	199636	0.855719	0.0652329
Q5T200_S643	ZC3H13	sp|Q5T200|ZC3HD_HUMAN	Q5T200	DQRPSsPIR;ERDQRPSsPIR	0.9638	0	0	47923.4	0.278737	0.0652352
O75569_S18	PRKRA	sp|O75569|PRKRA_HUMAN	O75569	AEAPPLEREDsGTFSLGK;EDsGTFSLGK	0.9756	67768.6	73526.2	107371	1.67098	0.0655455
Q96ST2_S248	IWS1	sp|Q96ST2|IWS1_HUMAN	Q96ST2	IsDSESEDPPR;IsDsESEDPPR	0.9752	232492	288118	203430	1.46045	0.0655703
Q12968_S240	NFATC3	sp|Q12968|NFAC3_HUMAN	Q12968	QsPCHSPRSSVtDENWLsPR	0.9041	20157.2	29160.9	12779.3	0.558075	0.0655726
Q12968_S256	NFATC3	sp|Q12968|NFAC3_HUMAN	Q12968	QsPCHSPRSSVtDENWLsPR	0.9064	20157.2	29160.9	12779.3	0.558075	0.0655726
Q12968_T250	NFATC3	sp|Q12968|NFAC3_HUMAN	Q12968	QsPCHSPRSSVtDENWLsPR	0.9062	20157.2	29160.9	12779.3	0.558075	0.0655726
P23528_S8	CFL1	sp|P23528|COF1_HUMAN	P23528	AsGVAVsDGVIK	1	95842.6	81854.1	101096	0.670652	0.0657816
Q9UQ35_S1064	SRRM2	sp|Q9UQ35|SRRM2_HUMAN	Q9UQ35	GQSQTsPDHRsDTSSPEVR;GQSQTsPDHRsDTSsPEVR	0.9361	17924.6	33435.5	27006.8	0.597637	0.0659365
Q9UQ35_S1069	SRRM2	sp|Q9UQ35|SRRM2_HUMAN	Q9UQ35	GQSQTSPDHRsDTSsPEVR;GQSQTsPDHRsDTSSPEVR;GQSQTsPDHRsDTSsPEVR	0.9364	17924.6	33435.5	27006.8	0.597637	0.0659365
Q9UH62_S43	ARMCX3	sp|Q9UH62|ARMX3_HUMAN	Q9UH62	MAEGGsGDVDDAGDCsGAR	1	20314.2	28060	26680.9	1.4239	0.0660801
Q9UH62_S53	ARMCX3	sp|Q9UH62|ARMX3_HUMAN	Q9UH62	MAEGGsGDVDDAGDCsGAR	1	20314.2	28060	26680.9	1.4239	0.0660801
Q15751_S1521	HERC1	sp|Q15751|HERC1_HUMAN	Q15751	SRSESDLSQPEsDEEGYALSGR;sRSESDLSQPEsDEEGYALSGR	0.8869	6455.78	8076.78	6827.83	0.649575	0.0661621
Q01130_S101	SRSF2	sp|Q01130|SRSF2_HUMAN	Q01130	YGRPPDSHHsR	0.967	0	2041.62	0	0.198668	0.0664492
Q9NQG6_S55	MIEF1	sp|Q9NQG6|MID51_HUMAN	Q9NQG6	AIsAPTsPTR;AIsAPtSPTR	0.9701	24843	28561.6	30243.9	0.696265	0.066611
Q9H8M2_S566	BRD9	sp|Q9H8M2|BRD9_HUMAN	Q9H8M2	DQHHLGsPSR	0.9698	3448.29	3422.39	0	0.276141	0.0666534
Q8IYB3_T727	SRRM1	sp|Q8IYB3|SRRM1_HUMAN	Q8IYB3	RVsRtPEPK;VSRtPEPK;VsRtPEPK	1	685364	620685	551858	0.726179	0.0668284
Q8IZ21_S590	PHACTR4	sp|Q8IZ21|PHAR4_HUMAN	Q8IZ21	RLsQRPTPEELEQR	0.961	3372.57	9463.11	0	0.301085	0.0669288
Q9UKV3_S561	ACIN1	sp|Q9UKV3|ACINU_HUMAN	Q9UKV3	RAsHTLLPSHR	0.9704	25691.1	39647.4	31203	1.5087	0.067087
P46100_S703	ATRX	sp|P46100|ATRX_HUMAN	P46100	NsSDSAIDNPKPNK;NsSDsAIDNPKPNK	0.9649	10297.6	7268.91	5173.32	2.02477	0.0672095
O94804_S417	STK10	sp|O94804|STK10_HUMAN	O94804	SRPVsMDAR	0.9614	10230.5	11128.3	13438.2	1.56078	0.0673118
Q9Y2F5_S1692	ICE1	sp|Q9Y2F5|ICE1_HUMAN	Q9Y2F5	RAsPPDPSPSPSAASASER	0.9577	2277.53	2990.49	3433.32	2.08071	0.0677522
Q9Y4E8_S229	USP15	sp|Q9Y4E8|UBP15_HUMAN	Q9Y4E8	GPSTPKsPGASNFSTLPK;sPGASNFSTLPK	0.9761	41387.1	46025.9	23043.6	1.90725	0.0677946
Q9H2H9_S56	SLC38A1	sp|Q9H2H9|S38A1_HUMAN	Q9H2H9	RSLtNsHLEK;RsLTNsHLEK;sLTNsHLEK	0.9705	101124	127247	96197.1	0.797566	0.0679242
Q92835_S1039	INPP5D	sp|Q92835|SHIP1_HUMAN	Q92835	KDQEsPKMPR	1	0	0	8156.07	0.224214	0.0680124
Q13769_T328	THOC5	sp|Q13769|THOC5_HUMAN	Q13769	RPtLGVQLDDK;RPtLGVQLDDKR;RRPtLGVQLDDK	1	21930.8	23021.7	10492.5	2.27321	0.0681091
Q9NTI5_S1257	PDS5B	sp|Q9NTI5|PDS5B_HUMAN	Q9NTI5	GHTAsESDEQQWPEEK	0.9626	44587.9	34902.4	30572.9	1.45427	0.0682938
Q9Y4E1_S539	WASHC2C	sp|Q9Y4E1|WAC2C_HUMAN	Q9Y4E1	GLFsDEEDSEDLFSSQSASNLK	0.9714	8130.3	13200.8	12857.3	1.7928	0.0684168
Q13111_S255	CHAF1A	sp|Q13111|CAF1A_HUMAN	Q13111	sLPAtPQGK	1	9727.39	10904.8	13087.6	0.593196	0.0684828
Q13111_T259	CHAF1A	sp|Q13111|CAF1A_HUMAN	Q13111	sLPAtPQGK	1	9727.39	10904.8	13087.6	0.593196	0.0684828
Q96QH2_S340	PRAM1	sp|Q96QH2|PRAM_HUMAN	Q96QH2	TSsEPEFNsLPR	0.9604	0	14007.6	14129.5	0.44683	0.0685339
O75533_T248	SF3B1	sp|O75533|SF3B1_HUMAN	O75533	GSEtPGAtPGSK;GsETPGAtPGSK	0.9718	6541.33	39800.1	21567.8	0.44645	0.0686033
P22059_S382	OSBP	sp|P22059|OSBP1_HUMAN	P22059	TGsNIsGASSDISLDEQYK;tGSNIsGASSDISLDEQYK	0.9696	18927.6	24884	29546.9	0.716343	0.0686623
Q9P1T7_S128	MDFIC	sp|Q9P1T7|MDFIC_HUMAN	Q9P1T7	KLsAPVsQK	1	4262.87	4983.99	4402.3	0.695197	0.0690318
O14579_S99	COPE	sp|O14579|COPE_HUMAN	O14579	RDsIVAELDR	1	9950.26	9364.97	8240.34	0.817572	0.0691917
Q96BF3_S262	TMIGD2	sp|Q96BF3|TMIG2_HUMAN	Q96BF3	VsPRPsPTQQPR	0.9747	23722.2	50941.6	46226.7	0.628007	0.0693308
Q96BF3_S266	TMIGD2	sp|Q96BF3|TMIG2_HUMAN	Q96BF3	VsPRPsPTQQPR	0.9747	23722.2	50941.6	46226.7	0.628007	0.0693308
O75821_S42	EIF3G	sp|O75821|EIF3G_HUMAN	O75821	GIPLATGDTsPEPELLPGAPLPPPK	0.9366	8138.77	0	0	0.279083	0.0694373
O60293_S953	ZFC3H1	sp|O60293|ZC3H1_HUMAN	O60293	LDSsPVSsPR	0.9592	18778.5	20454.6	24765.3	0.71786	0.0704482
O60716_S268	CTNND1	sp|O60716|CTND1_HUMAN	O60716	VGGsSVDLHR	0.973	11783.3	8761.59	14245.2	0.699334	0.0704985
Q8TBF4_S210	ZCRB1	sp|Q8TBF4|ZCRB1_HUMAN	Q8TBF4	KSTYFsDEEELsD;STYFsDEEELsD	0.9721	11296.8	8012.61	19360	0.544186	0.0705809
Q8TBF4_S216	ZCRB1	sp|Q8TBF4|ZCRB1_HUMAN	Q8TBF4	KSTYFsDEEELsD;STYFsDEEELsD	0.9723	11296.8	8012.61	19360	0.544186	0.0705809
P35659_S51	DEK	sp|P35659|DEK_HUMAN	P35659	EEsEEEEDEDDEEEEEEEKEKsLIVEGK;EKsLIVEGK	1	79452	62484.9	66555.4	0.811215	0.0708538
Q09666_S3426	AHNAK	sp|Q09666|AHNK_HUMAN	Q09666	VSMPDVELNLKsPK	0.9688	3387.41	7129.39	7627.37	3.14168	0.0711336
Q8IYB3_S653	SRRM1	sp|Q8IYB3|SRRM1_HUMAN	Q8IYB3	RRsPSLSSK;RRsPSLSsK;RRsPSLsSK;RRsPsLSSK;RsPSLSSK;RsPsLSSK;sPSLSSK	0.9755	228078	278864	128382	0.575541	0.0720472
O00267_S32	SUPT5H	sp|O00267|SPT5H_HUMAN	O00267	sAAGsEKEEEPEDEEEEEEEEEYDEEEEEEDDDRPPK	0.9734	36227	38854	0	0.422967	0.0722087
O00267_S36	SUPT5H	sp|O00267|SPT5H_HUMAN	O00267	sAAGsEKEEEPEDEEEEEEEEEYDEEEEEEDDDRPPK	0.9734	36227	38854	0	0.422967	0.0722087
Q9UKV3_S210	ACIN1	sp|Q9UKV3|ACINU_HUMAN	Q9UKV3	SSSIsEEKGDsDDEKPR	0.9694	11206.3	11738.7	5166.45	0.6082	0.0725299
Q9UQ35_S536	SRRM2	sp|Q9UQ35|SRRM2_HUMAN	Q9UQ35	sPQRPGWSR;sRsPQRPGWSR	0.9759	39633.4	55353.6	9819.78	0.49269	0.0726951
Q8TAQ2_S286	SMARCC2	sp|Q8TAQ2|SMRC2_HUMAN	Q8TAQ2	TLTDEVNsPDsDRR	0.9662	2773.61	5380.29	4389.5	0.465791	0.0728234
P41236_S121	PPP1R2	sp|P41236|IPP2_HUMAN	P41236	IQEQEssGEEDSDLSPEER	0.9701	10767.6	8504.31	4504.72	0.480415	0.0728529
P41236_S122	PPP1R2	sp|P41236|IPP2_HUMAN	P41236	IQEQEssGEEDSDLSPEER	0.9701	10767.6	8504.31	4504.72	0.480415	0.0728529
P51610_S666	HCFC1	sp|P51610|HCFC1_HUMAN	P51610	sPISVPGGSALISNLGK	0.9736	5635.33	13511.3	6949.13	3.10737	0.0728613
Q14669_S1317	TRIP12	sp|Q14669|TRIPC_HUMAN	Q14669	VREDDEDsDDDGsDEEIDESLAAQFLNSGNVR	0.9191	0	2713.88	0	0.116458	0.0730601
Q14669_S1322	TRIP12	sp|Q14669|TRIPC_HUMAN	Q14669	VREDDEDsDDDGsDEEIDESLAAQFLNSGNVR	0.9191	0	2713.88	0	0.116458	0.0730601
Q12888_S523	TP53BP1	sp|Q12888|TP53B_HUMAN	Q12888	LMLSTSEYsQsPK	0.968	11014.7	13394.2	6185.49	0.644296	0.0731916
P46013_S3253	MKI67	sp|P46013|KI67_HUMAN	P46013	SHRDsEDI	0.9578	6337.94	12835.9	14977.6	2.29266	0.0733512
Q8IYB3_S260	SRRM1	sp|Q8IYB3|SRRM1_HUMAN	Q8IYB3	VPKPEPIPEPKEPsPEK	1	3251.2	5279.27	6645.23	0.300588	0.0734016
Q92614_S2020	MYO18A	sp|Q92614|MY18A_HUMAN	Q92614	SLAPDRsDDEHDPLDNTSR;SLAPDRsDDEHDPLDNTSRPR	0.975	96554.8	126198	89705.4	0.740187	0.0734435
P17706_S298	PTPN2	sp|P17706|PTN2_HUMAN	P17706	EDLsPAFDHsPNK	1	5317.52	5253.57	4102.76	2.28959	0.0735717
Q86V48_S394	LUZP1	sp|Q86V48|LUZP1_HUMAN	Q86V48	ELsPQHK	1	7638.01	9919.44	18845.2	4.37315	0.073577
Q9BRD0_S240	BUD13	sp|Q9BRD0|BUD13_HUMAN	Q9BRD0	HGsSDISsPR	0.9522	29323.8	36121.7	44610.9	0.361445	0.073665
O60832_S453	DKC1	sp|O60832|DKC1_HUMAN	O60832	KRESEsEsDETPPAAPQLIK;KREsEsESDETPPAAPQLIK	0.9691	37452.3	101151	20549.6	0.428118	0.0742549
O15042_S788	U2SURP	sp|O15042|SR140_HUMAN	O15042	WELFDQHEEsEEEENQNQEEEsEDEEDTQSSK	0.9535	22729.7	25383.9	15991.7	0.616301	0.0743147
O15042_S800	U2SURP	sp|O15042|SR140_HUMAN	O15042	WELFDQHEEsEEEENQNQEEEsEDEEDTQSSK	0.9569	22729.7	25383.9	15991.7	0.616301	0.0743147
Q9P1T7_S124	MDFIC	sp|Q9P1T7|MDFIC_HUMAN	Q9P1T7	KLsAPVSQK;KLsAPVsQK	1	4287.45	5114.19	4427.68	0.717307	0.0744012
Q9UQ35_S1842	SRRM2	sp|Q9UQ35|SRRM2_HUMAN	Q9UQ35	GRsRtPPTSR;sRtPPTSR	0.9763	310031	413592	269796	0.746237	0.0744324
Q9UQ35_T1844	SRRM2	sp|Q9UQ35|SRRM2_HUMAN	Q9UQ35	GRsRtPPTSR;sRtPPTSR	0.9763	310031	413592	269796	0.746237	0.0744324
O60293_S949	ZFC3H1	sp|O60293|ZC3H1_HUMAN	O60293	LDSsPVSSPR;LDSsPVSsPR;LDssPVSSPR	0.9592	19593.8	20776.6	25415.8	0.735439	0.0746223
P51858_S132	HDGF	sp|P51858|HDGF_HUMAN	P51858	GNAEGsSDEEGKLVIDEPAK;GNAEGssDEEGKLVIDEPAK;GNAEGssDEEGKLVIDEPAKEK;KGNAEGsSDEEGKLVIDEPAK;KGNAEGssDEEGKLVIDEPAK	1	303362	311602	198263	0.709827	0.0746925
Q05519_S449	SRSF11	sp|Q05519|SRS11_HUMAN	Q05519	KPIETGsPK	0.9638	159101	157790	181532	0.675909	0.0747641
P78362_S494	SRPK2	sp|P78362|SRPK2_HUMAN	P78362	TVsASsTGDLPK;TVsAsSTGDLPK	0.9696	58231.1	62002.5	71250.9	1.17587	0.074807
Q9HCH0_S498	NCKAP5L	sp|Q9HCH0|NCK5L_HUMAN	Q9HCH0	NSGSDGSPsPLLAR	0.9749	0	5779.15	3820.05	0.412703	0.0748715
P18858_S201	LIG1	sp|P18858|DNLI1_HUMAN	P18858	AETPTESVsEPEVATK;AEtPTESVsEPEVATK	0.9748	34331.6	35376.3	37854.5	1.33526	0.0758321
Q13464_S1336	ROCK1	sp|Q13464|ROCK1_HUMAN	Q13464	sTANQsFRK	0.9475	3415.91	5695.15	3315.26	0.113529	0.0760689
Q13464_S1341	ROCK1	sp|Q13464|ROCK1_HUMAN	Q13464	sTANQsFRK	0.9464	3415.91	5695.15	3315.26	0.113529	0.0760689
Q9H1C4_S547	UNC93B1	sp|Q9H1C4|UN93B_HUMAN	Q9H1C4	YLEEDNsDEsDAEGEHGDGAEEEAPPAGPR	0.9692	38735.5	75006.5	22841.4	0.532285	0.076312
Q9H1C4_S550	UNC93B1	sp|Q9H1C4|UN93B_HUMAN	Q9H1C4	YLEEDNsDEsDAEGEHGDGAEEEAPPAGPR	0.9693	38735.5	75006.5	22841.4	0.532285	0.076312
Q99590_S774	SCAF11	sp|Q99590|SCAFB_HUMAN	Q99590	VETVSQPsESPKDTIDK;VETVSQPsEsPK;VETVsQPsESPKDTIDK	0.9254	31193.1	28776	20707.5	1.64454	0.0764941
Q96Q42_S1335	ALS2	sp|Q96Q42|ALS2_HUMAN	Q96Q42	QHRDsPEILSR	0.9755	6599.27	5969.21	3656.99	0.701821	0.0766108
Q15751_S2720	HERC1	sp|Q15751|HERC1_HUMAN	Q15751	RQsLTSPDSQSAR	0.9642	10016.1	9096.53	9188.77	0.881755	0.0767139
Q96B97_S230	SH3KBP1	sp|Q96B97|SH3K1_HUMAN	Q96B97	sIEVENDFLPVEK	1	18218.2	12604.8	10663.9	0.691435	0.0768231
Q13017_S1176	ARHGAP5	sp|Q13017|RHG05_HUMAN	Q13017	RTHsDAsDDEAFTTSK;THSDAsDDEAFTTSK;THsDAsDDEAFTTSK	0.9715	20140.4	23293.8	24149	0.847189	0.0769017
Q92766_S1175	RREB1	sp|Q92766|RREB1_HUMAN	Q92766	ANsGGVDLDSsGEFASIEK	0.9377	12314.2	16991.5	18512.3	3.56371	0.0771363
P62753_T241	RPS6	sp|P62753|RS6_HUMAN	P62753	LSsLRAStSK;LSsLRAStSKsESSQK;LSsLRAstSKSESSQK;RLssLRAStSK	0.8969	88982.9	0	0	0.289859	0.0771881
O14976_S826	GAK	sp|O14976|GAK_HUMAN	O14976	ESESALMEDRDEsEVsDEGGSPISSEGQEPR	0.9592	6125.5	13472.8	9843.4	0.485865	0.0771886
O14976_S829	GAK	sp|O14976|GAK_HUMAN	O14976	ESESALMEDRDEsEVsDEGGSPISSEGQEPR	0.9594	6125.5	13472.8	9843.4	0.485865	0.0771886
Q9UBW5_S273	BIN2	sp|Q9UBW5|BIN2_HUMAN	Q9UBW5	TATVSsPLTSPTSPSTLSLK;TATVSsPLTSPTsPSTLSLK;TATVSsPLTSPtSPSTLSLK;TATVSsPLTsPTSPSTLSLK	0.9711	23202.7	57522.6	45409	2.30365	0.0772745
P54274_S7	TERF1	sp|P54274|TERF1_HUMAN	P54274	AEDVSsAAPsPR	0.9741	0	6731.53	8551.2	0.442139	0.0773455
Q9UQ35_S1987	SRRM2	sp|Q9UQ35|SRRM2_HUMAN	Q9UQ35	SRTsPVTR;SRtsPVTR;sRTsPVTR;sRsRTsPVTR	0.9697	120775	590597	981777	0.457846	0.0774931
Q8NFC6_S537	BOD1L1	sp|Q8NFC6|BD1L1_HUMAN	Q8NFC6	sSVDLEESSTK	0.9609	17292.4	10181.3	14853.3	1.72457	0.0775242
Q9NV56_S195	MRGBP	sp|Q9NV56|MRGBP_HUMAN	Q9NV56	VLTANSNPSsPSAAK;VLTANsNPSsPSAAK	0.9719	11621.3	10478.5	8700.43	0.67013	0.0777786
P46013_S538	MKI67	sp|P46013|KI67_HUMAN	P46013	sLVMHTPPVLK	0.9715	9149.79	4825.91	3295.47	4.31543	0.0779144
P50402_S171	EMD	sp|P50402|EMD_HUMAN	P50402	DSAYQSITHYRPVsASR	0.9666	11353	19996.3	12493.5	0.609423	0.078053
Q5M775_S55	SPECC1	sp|Q5M775|CYTSB_HUMAN	Q5M775	ASsEDTLNKPGSTAASGVVR	0.9728	9026.56	8738.76	8478.21	1.15456	0.078143
P49736_S27	MCM2	sp|P49736|MCM2_HUMAN	P49736	GNDPLTSsPGR;GNDPLTSsPGRSsR;GNDPLTSsPGRsSR;GNDPLTssPGR;GNDPLTssPGRSSR;RGNDPLTSsPGR;RGNDPLTssPGR;RGNDPLtSsPGR	0.9746	523814	551882	492855	0.824726	0.0781877
Q5JTV8_S315	TOR1AIP1	sp|Q5JTV8|TOIP1_HUMAN	Q5JTV8	SELGNQsPSTSSR	0.9357	12151.9	9418.92	10742.6	2.24875	0.078259
O95251_S52	KAT7	sp|O95251|KAT7_HUMAN	O95251	LSQsSQDSSPVR;LSQsSQDSsPVR	0.9312	39613.3	44888.3	47811.5	3.33832	0.078267
Q9Y3Q8_S165	TSC22D4	sp|Q9Y3Q8|T22D4_HUMAN	Q9Y3Q8	sFTGGLGQLVVPSK	0.97	2228.38	7911.35	4193.72	0.324458	0.0783897
P19338_S206	NCL	sp|P19338|NUCL_HUMAN	P19338	AAAAAPASEDEDDEDDEDDEDDDDDEEDDsEEEAMETTPAK;AAAAAPASEDEDDEDDEDDEDDDDDEEDDsEEEAMEttPAK;AAAAAPAsEDEDDEDDEDDEDDDDDEEDDsEEEAMETTPAK;AAAAAPAsEDEDDEDDEDDEDDDDDEEDDsEEEAMETtPAK	0.9769	708214	665407	735985	0.848364	0.0785245
Q8TEA8_S205	DTD1	sp|Q8TEA8|DTD1_HUMAN	Q8TEA8	SASSGAEGDVSsEREP;SASsGAEGDVSsEREP;sASSGAEGDVSsEREP	0.9523	12394.9	13489.2	14191.7	0.773086	0.0787746
Q9H063_S75	MAF1	sp|Q9H063|MAF1_HUMAN	Q9H063	sQGGEEEGPLSDK	0.9764	47014	52043.5	41153.1	1.23375	0.0787923
Q9H0G5_S248	NSRP1	sp|Q9H0G5|NSRP1_HUMAN	Q9H0G5	VEENPDADsDFDAK	1	6080.1	6175.77	5347.04	1.27228	0.0788417
O15021_S1467	MAST4	sp|O15021|MAST4_HUMAN	O15021	KHsLEVTQEEVQR	0.9703	6301.55	6505.26	5382.77	1.21275	0.0789398
Q8N163_S675	CCAR2	sp|Q8N163|CCAR2_HUMAN	Q8N163	sVAsNQSEMEFSSLQDMPK	0.8123	0	0	0	0	0.0790398
Q96PC5_S1255	MIA2	sp|Q96PC5|MIA2_HUMAN	Q96PC5	SFNMPsLDK	0.9731	20455.1	17606.1	11884.2	1.57395	0.0794645
Q9NW75_S284	GPATCH2	sp|Q9NW75|GPTC2_HUMAN	Q9NW75	QGDDEQsDWFYEK	0.9738	3409.64	4341.13	2741.61	0.552267	0.0796948
Q86VZ1_S332	P2RY8	sp|Q86VZ1|P2RY8_HUMAN	Q86VZ1	TTsVRSEAGAHPEGMEGATR;TTsVRSEAGAHPEGMEGAtR;TTsVRsEAGAHPEGMEGATR;TTsVRsEAGAHPEGMEGATRPGLQR	0.9769	13860.2	32712.5	3792.57	0.397402	0.0798443
Q07866_S524	KLC1	sp|Q07866|KLC1_HUMAN	Q07866	sREsLNVDVVK	1	8017.58	10344.6	3880.39	0.603151	0.0799834
Q8NAV1_S209	PRPF38A	sp|Q8NAV1|PR38A_HUMAN	Q8NAV1	VPsPDHR	1	66077.2	39472.2	53884	0.558232	0.0801368
Q5TBA9_S2507	FRY	sp|Q5TBA9|FRY_HUMAN	Q5TBA9	QLSGsTPsLNK	0.9435	3250.36	8836.88	4443.95	0.483893	0.0802625
Q5TBA9_S2510	FRY	sp|Q5TBA9|FRY_HUMAN	Q5TBA9	QLSGsTPsLNK	0.9441	3250.36	8836.88	4443.95	0.483893	0.0802625
O95071_S2241	UBR5	sp|O95071|UBR5_HUMAN	O95071	DLsLEVDR	1	7432.77	7904.8	7416.18	1.24152	0.0803725
Q9UI08_S345	EVL	sp|Q9UI08|EVL_HUMAN	Q9UI08	TPsVAKsPEAK	0.9719	31224.2	32290.1	28690.9	3.34211	0.0805612
P23528_S3	CFL1	sp|P23528|COF1_HUMAN	P23528	AsGVAVSDGVIK;AsGVAVsDGVIK	1	1.8364e+06	1.6854e+06	2.13384e+06	0.81841	0.0808254
Q96PK6_S618	RBM14	sp|Q96PK6|RBM14_HUMAN	Q96PK6	LsESQLSFR;RLsESQLSFR	0.9704	12228.6	10973.8	11890.7	1.09218	0.081115
P51532_S1586	SMARCA4	sp|P51532|SMCA4_HUMAN	P51532	IEKEDDsEGEEsEEEEEGEEEGsESESR	0.9505	10049.4	13093.7	29358.8	0.545263	0.0812086
Q1KMD3_S185	HNRNPUL2	sp|Q1KMD3|HNRL2_HUMAN	Q1KMD3	AAEEQGDDQDsEKsKPAGSDGER	0.7838	4684.36	14428.7	0	0.346354	0.0813539
Q1KMD3_S188	HNRNPUL2	sp|Q1KMD3|HNRL2_HUMAN	Q1KMD3	AAEEQGDDQDsEKsKPAGSDGER	0.7838	4684.36	14428.7	0	0.346354	0.0813539
O43516_S234	WIPF1	sp|O43516|WIPF1_HUMAN	O43516	GTALGGGsIR	0.9741	9589.69	5274.09	6267.8	0.428674	0.081672
Q14978_S643	NOLC1	sp|Q14978|NOLC1_HUMAN	Q14978	VADNsFDAK	1	30138.3	24015.3	28035.9	1.29254	0.0817253
P27816_S825	MAP4	sp|P27816|MAP4_HUMAN	P27816	sPSTLLPK	0.9724	19374.1	19218.5	14393.9	1.28003	0.0817745
Q96JM3_S275	CHAMP1	sp|Q96JM3|CHAP1_HUMAN	Q96JM3	TTsPEPR	0.969	3611.16	7354.17	11898.9	5.81087	0.0820428
Q9Y613_S523	FHOD1	sp|Q9Y613|FHOD1_HUMAN	Q9Y613	EPLIPAsPK	1	8188.91	9268.19	8256.73	1.21032	0.0820943
P51608_S80	MECP2	sp|P51608|MECP2_HUMAN	P51608	AETSEGSGSAPAVPEASAsPK	0.9739	17125.7	15030.2	12452	0.796141	0.0821951
Q92738_S391	USP6NL	sp|Q92738|US6NL_HUMAN	Q92738	sVGRPsPLASGR	0.9706	4015.99	9081.93	6846.05	0.609996	0.0822026
Q92738_S396	USP6NL	sp|Q92738|US6NL_HUMAN	Q92738	sVGRPsPLASGR	0.9711	4015.99	9081.93	6846.05	0.609996	0.0822026
P02769_S133	ALB	contam_sp|P02769|ALBU_BOVIN	P02769	DDsPDLPK	1	28610	20922.7	10917	2.50882	0.0822968
Q5VSL9_S335	STRIP1	sp|Q5VSL9|STRP1_HUMAN	Q5VSL9	AAsPPASASDLIEQQQK	0.9759	42543.4	50550.6	49879.7	1.14396	0.0823077
Q7Z5L9_S175	IRF2BP2	sp|Q7Z5L9|I2BP2_HUMAN	Q7Z5L9	LEEPPELNRQsPNPR	1	38003	67091.2	30412.2	0.626579	0.0824899
Q9H2K8_S324	TAOK3	sp|Q9H2K8|TAOK3_HUMAN	Q9H2K8	NGPLNEsQEDEEDSEHGTSLNR	0.9753	22405.3	33190.9	19242.7	1.67425	0.0825882
O75694_S992	NUP155	sp|O75694|NU155_HUMAN	O75694	AAPQsPSVPK	0.9722	41428.9	28602.2	36481.1	1.35778	0.0825896
O75122_S455	CLASP2	sp|O75122|CLAP2_HUMAN	O75122	MVSQsQPGsR	0.9619	5619.45	13113.6	8263.66	0.339327	0.0826394
Q08170_S288	SRSF4	sp|Q08170|SRSF4_HUMAN	Q08170	sRsPSRHK	0.9448	3088.02	11707	8437.47	0.52613	0.0827392
Q08170_S290	SRSF4	sp|Q08170|SRSF4_HUMAN	Q08170	sRsPSRHK	0.9446	3088.02	11707	8437.47	0.52613	0.0827392
Q9H6S0_S1090	YTHDC2	sp|Q9H6S0|YTDC2_HUMAN	Q9H6S0	VDGIPNDSsDSEMEDK	0.9501	15626.2	16457	10939.7	2.35775	0.0828499
P18858_T195	LIG1	sp|P18858|DNLI1_HUMAN	P18858	AEtPTESVSEPEVATK;AEtPTESVsEPEVATK;AEtPTEsVSEPEVATK	0.9759	33606.3	40589.7	39419.7	1.15614	0.0830158
Q13112_T433	CHAF1B	sp|Q13112|CAF1B_HUMAN	Q13112	TQDPSsPGTtPPQAR;TQDPsSPGTtPPQAR	0.9728	81140.4	93941.6	80232.7	0.838179	0.083147
O15021_S355	MAST4	sp|O15021|MAST4_HUMAN	O15021	SRsLsPGR;sRsLSPGR	0.9681	59506	151892	107017	0.549226	0.0833488
P62805_Y73	H4C1	sp|P62805|H4_HUMAN	P62805	DAVTyTEHAK	0.9084	7401.91	6016.56	12292.7	2.06742	0.0834543
Q9ULX3_S201	NOB1	sp|Q9ULX3|NOB1_HUMAN	Q9ULX3	KDDsDDDGGGWITPSNIK	0.9764	77398.5	66085.7	40967.1	0.703878	0.0836609
Q13057_S178	COASY	sp|Q13057|COASY_HUMAN	Q13057	PAsPVAGSPK	0.9745	14766.1	15517.6	13438.3	1.17686	0.0837755
Q15154_S1730	PCM1	sp|Q15154|PCM1_HUMAN	Q15154	ILEDHGsPAGEIDDEDKDKDETETVK	0.9758	11906.5	14426.5	8225.85	0.730776	0.0838209
Q92974_S932	ARHGEF2	sp|Q92974|ARHG2_HUMAN	Q92974	ERQELGsPEER;QELGsPEER	1	55548.2	40172	50486.5	1.33916	0.0842658
O60885_S1045	BRD4	sp|O60885|BRD4_HUMAN	O60885	PQQVIQHHHsPR	1	1514.66	2821.69	2038.26	0.47869	0.0842993
Q8NEY8_S205	PPHLN1	sp|Q8NEY8|PPHLN_HUMAN	Q8NEY8	DTsPSSGSAVSSSK;TSRDTsPSSGSAVSSSK;TSRDtsPSSGSAVSSSK	0.9743	33538.7	61223.6	74177.3	0.640315	0.0846717
O60832_S451	DKC1	sp|O60832|DKC1_HUMAN	O60832	KREsESEsDETPPAAPQLIK;KREsEsESDETPPAAPQLIK	0.9691	18465.5	77029.7	23036	0.466099	0.084727
Q9Y2U8_S144	LEMD3	sp|Q9Y2U8|MAN1_HUMAN	Q9Y2U8	VLLGFSSDEsDVEASPR	0.9724	9627.93	12334.9	12736.9	0.692346	0.0848382
Q9Y2W1_S243	THRAP3	sp|Q9Y2W1|TR150_HUMAN	Q9Y2W1	ASAVSELsPR;AsAVSELsPR	0.9743	230891	240564	290200	0.824868	0.0849658
Q8IYB3_S725	SRRM1	sp|Q8IYB3|SRRM1_HUMAN	Q8IYB3	RVsRtPEPK;VsRtPEPK	1	686439	605302	551858	0.711569	0.0850431
O75379_S30	VAMP4	sp|O75379|VAMP4_HUMAN	O75379	NLLEDDsDEEEDFFLR	1	14723.6	18001.2	7840.1	0.624271	0.0850789
P49006_S104	MARCKSL1	sp|P49006|MRP_HUMAN	P49006	LSGLsFK;LSGLsFKR	0.9713	9025.02	10214.4	8516.35	0.827368	0.0852528
Q9UQ35_S2581	SRRM2	sp|Q9UQ35|SRRM2_HUMAN	Q9UQ35	RVPsPTPAPK;VPsPTPAPK	0.9751	77707.5	59487.8	70946.1	1.22133	0.0853607
O75533_S242	SF3B1	sp|O75533|SF3B1_HUMAN	O75533	GsETPGAtPGSK	0.9558	6060.77	36254.3	18307.6	0.483291	0.0854947
Q9UKJ3_S1009	GPATCH8	sp|Q9UKJ3|GPTC8_HUMAN	Q9UKJ3	KRsWGHEsPEER;sWGHEsPEER	1	16234.8	31462.8	15480.8	0.637072	0.0855041
[truncated: 4,913 more rows]
